# Supplementary material
Source: publisher figshare collection journal article supplement (https://tandf.figshare.com/articles/dataset/_/13259017)
Supplement: Supplementary file 1 [file 1]

**Supplemental Table 1.** Response of parental genotypes to stem rust assessed from 2008 to 2011 in Njoro, Kenya and Morden, Canada

| Stem rust reaction           | Parental genotype | Njoro, Kenya <sup>#</sup> |      |      | Morden, Canada <sup>\$</sup> |      |
|------------------------------|-------------------|---------------------------|------|------|------------------------------|------|
|                              |                   | 2008                      | 2009 | 2010 | 2011                         | 2010 |
| Infection Response (IR)      | Strongfield       | MS                        | MSS  | RMR  | MSS                          | -    |
|                              | A9919-BY5C        | -                         | R    | R    | R                            | -    |
| Severity (%)                 | Strongfield       | 60                        | 20   | 5    | 40                           | -    |
|                              | A9919-BY5C        | -                         | 1    | 0    | 10                           | -    |
| Seedling Infection Type (IT) | Strongfield       | -                         | -    | -    | -                            | 0    |
|                              | A9919-BY5C        | -                         | -    | -    | -                            | 1-1  |

<sup>#</sup>Ug99-type races (predominately TTKST, but also TTKSK and TTTSK in low proportions)

<sup>\$</sup>Ug99 race TTKSK (isolate SA31)
