# Supplementary material
Source: publisher figshare collection journal article supplement (https://tandf.figshare.com/articles/dataset/_/13259017)
Supplement: Supplementary file 2 [file 1]

**Supplemental Table 2.** Genetic map of A9919-BY5C/Strongfield. Summary of the 4,721 SNP and DArT markers mapped in the Strongfield and A9919-BY5C doubled haploid population and a subset of 613 markers selected for QTL analysis.

| Linkage group | Marker code | Marker name             | Position (cM) | Interval (cM) | Used for QTL analysis |
|---------------|-------------|-------------------------|---------------|---------------|-----------------------|
| 1A_1          | wPt-6530    | wPt-6530                | 0.0           | 0.7           | Yes                   |
| 1A_1          | wPt-8838    | wPt-8838                | 0.7           | 4.0           | Yes                   |
| 1A_1          | 39626453    | TA005181-0473           | 4.6           | 0.0           | Yes                   |
| 1A_1          | 65689362    | BobWhite_c13039_184     | 4.6           | 0.0           | Yes                   |
| 1A_1          | 57744391    | BobWhite_c18184_107     | 4.6           | 0.0           | No                    |
| 1A_1          | 15750464    | BobWhite_c26122_129     | 4.6           | 0.0           | No                    |
| 1A_1          | 61726344    | BobWhite_c28971_184     | 4.6           | 0.0           | No                    |
| 1A_1          | 73705455    | BobWhite_c96_170        | 4.6           | 0.0           | No                    |
| 1A_1          | 54684445    | BS00012042_51           | 4.6           | 0.0           | No                    |
| 1A_1          | 20633491    | BS00028146_51           | 4.6           | 0.0           | No                    |
| 1A_1          | 59653326    | BS00065114_51           | 4.6           | 0.0           | No                    |
| 1A_1          | 43650374    | BS00087589_51           | 4.6           | 0.0           | No                    |
| 1A_1          | 72672414    | CAP7_c11581_78          | 4.6           | 0.0           | No                    |
| 1A_1          | 12787358    | CAP8_c2578_452          | 4.6           | 0.0           | No                    |
| 1A_1          | 64767333    | Excalibur_c14859_394    | 4.6           | 0.0           | No                    |
| 1A_1          | 10660375    | IAAV8743                | 4.6           | 0.0           | No                    |
| 1A_1          | 72692349    | IACX11345               | 4.6           | 0.0           | No                    |
| 1A_1          | 50747431    | IACX9046                | 4.6           | 0.0           | No                    |
| 1A_1          | 61749487    | Kukri_c10405_1277       | 4.6           | 0.0           | No                    |
| 1A_1          | 24741476    | Kukri_c43972_367        | 4.6           | 0.0           | No                    |
| 1A_1          | 73656347    | Kukri_c45512_193        | 4.6           | 0.0           | No                    |
| 1A_1          | 52668343    | RAC875_c15918_407       | 4.6           | 0.0           | No                    |
| 1A_1          | 12674346    | RAC875_c31031_387       | 4.6           | 0.0           | No                    |
| 1A_1          | 54779351    | RAC875_rep_c109970_73   | 4.6           | 0.0           | No                    |
| 1A_1          | 70630370    | RAC875_rep_c95460_302   | 4.6           | 0.0           | No                    |
| 1A_1          | 19615496    | TA005587-0433           | 4.6           | 0.0           | No                    |
| 1A_1          | 57626390    | Tdurum_contig29437_126  | 4.6           | 0.0           | No                    |
| 1A_1          | 69632335    | Tdurum_contig44112_1609 | 4.6           | 0.0           | No                    |
| 1A_1          | 41619431    | Tdurum_contig44112_1850 | 4.6           | 0.0           | No                    |
| 1A_1          | 32745501    | Tdurum_contig47620_592  | 4.6           | 0.0           | No                    |
| 1A_1          | 42704400    | Tdurum_contig48037_385  | 4.6           | 0.0           | No                    |
| 1A_1          | 17714339    | Tdurum_contig48037_499  | 4.6           | 0.0           | No                    |
| 1A_1          | 58727454    | Tdurum_contig57566_1035 | 4.6           | 0.0           | No                    |
| 1A_1          | 26797313    | Tdurum_contig57566_1653 | 4.6           | 0.0           | No                    |
| 1A_1          | 67736338    | Tdurum_contig57566_1755 | 4.6           | 0.0           | No                    |
| 1A_1          | 61706485    | Tdurum_contig57566_809  | 4.6           | 0.0           | No                    |
| 1A_1          | 56600321    | Tdurum_contig57566_827  | 4.6           | 0.0           | No                    |
| 1A_1          | 15627430    | Tdurum_contig79608_369  | 4.6           | 0.0           | No                    |
| 1A_1          | 48626364    | Tdurum_contig79608_437  | 4.6           | 0.0           | No                    |

|      |                          |                            |      |      |     |
|------|--------------------------|----------------------------|------|------|-----|
| 1A_1 | 15794492                 | wsnp_BG263358A_Ta_2_3      | 4.6  | 0.0  | No  |
| 1A_1 | 36784475                 | wsnp_Ex_c5060_8985678      | 4.6  | 0.0  | No  |
| 1A_1 | 25682393                 | wsnp_Ex_c6563_11378632     | 4.6  | 0.0  | No  |
| 1A_1 | 29805342                 | wsnp_Ku_c33917_43336069    | 4.6  | 0.0  | No  |
| 1A_1 | 66622366                 | wsnp_RFL_Contig1109_136771 | 4.6  | 2.6  | No  |
| 1A_1 | 41642475                 | BS00022239_51              | 7.2  | 0.0  | Yes |
| 1A_1 | 64675446                 | BS00081002_51              | 7.2  | 0.0  | No  |
| 1A_1 | 29651467                 | Excalibur_c45861_189       | 7.2  | 0.0  | No  |
| 1A_1 | 48751333                 | Tdurum_contig21329_326     | 7.2  | 1.4  | No  |
| 1A_1 | 58794377                 | BS00022261_51              | 8.6  | 0.0  | Yes |
| 1A_1 | 72658344                 | BS00022848_51              | 8.6  | 0.0  | No  |
| 1A_1 | 72746411                 | BS00109991_51              | 8.6  | 0.0  | No  |
| 1A_1 | 29775466                 | GENE-0262_431              | 8.6  | 0.0  | No  |
| 1A_1 | 24706370                 | RAC875_c6798_467           | 8.6  | 5.5  | No  |
| 1A_1 | 65639344                 | BS00088136_51              | 14.1 | 0.0  | Yes |
| 1A_1 | 60677431                 | Excalibur_c1845_4911       | 14.1 | 0.0  | No  |
| 1A_1 | 43771335                 | Excalibur_c1845_718        | 14.1 | 0.0  | No  |
| 1A_1 | 62722455                 | Excalibur_c52725_585       | 14.1 | 0.0  | No  |
| 1A_1 | 17725310                 | Excalibur_c65755_51        | 14.1 | 0.0  | No  |
| 1A_1 | 27600331                 | Kukri_c28695_269           | 14.1 | 0.0  | No  |
| 1A_1 | 38602388                 | RAC875_c12993_127          | 14.1 | 0.0  | No  |
| 1A_1 | 68810422                 | RAC875_c12993_201          | 14.1 | 0.0  | No  |
| 1A_1 | 59809361                 | RAC875_c45115_340          | 14.1 | 0.0  | No  |
| 1A_1 | 66784350                 | RAC875_c45115_509          | 14.1 | 0.0  | No  |
| 1A_1 | 32785466                 | wsnp_Ex_c1845_3472790      | 14.1 | 15.1 | No  |
| 1A_1 | <a href="#">wPt-6074</a> | <a href="#">wPt-6074</a>   | 29.2 | 2.6  | Yes |
| 1A_1 | 18799347                 | BobWhite_c12568_900        | 31.8 | 0.0  | Yes |
| 1A_1 | 36793427                 | BobWhite_c5356_1272        | 31.8 | 0.0  | No  |
| 1A_1 | 53634349                 | BobWhite_rep_c49207_243    | 31.8 | 0.0  | No  |
| 1A_1 | 32632380                 | BobWhite_rep_c63278_349    | 31.8 | 0.0  | No  |
| 1A_1 | 52675336                 | BobWhite_rep_c63819_182    | 31.8 | 0.0  | No  |
| 1A_1 | 20654376                 | BS00002216_51              | 31.8 | 0.0  | No  |
| 1A_1 | 63753473                 | BS00021714_51              | 31.8 | 0.0  | No  |
| 1A_1 | 59680384                 | BS00021889_51              | 31.8 | 0.0  | No  |
| 1A_1 | 23674463                 | BS00022698_51              | 31.8 | 0.0  | No  |
| 1A_1 | 28629365                 | BS00033469_51              | 31.8 | 0.0  | No  |
| 1A_1 | 11610496                 | BS00063068_51              | 31.8 | 0.0  | No  |
| 1A_1 | 32793362                 | BS00065676_51              | 31.8 | 0.0  | No  |
| 1A_1 | 69795445                 | BS00073585_51              | 31.8 | 0.0  | No  |
| 1A_1 | 16695343                 | Ex_c5192_943               | 31.8 | 0.0  | No  |
| 1A_1 | 64650479                 | Excalibur_c10167_1028      | 31.8 | 0.0  | No  |
| 1A_1 | 22644345                 | Excalibur_c34697_831       | 31.8 | 0.0  | No  |
| 1A_1 | 30684341                 | Excalibur_c49421_443       | 31.8 | 0.0  | No  |
| 1A_1 | 43696313                 | Excalibur_rep_c112145_271  | 31.8 | 0.0  | No  |

|      |          |                             |      |     |     |
|------|----------|-----------------------------|------|-----|-----|
| 1A_1 | 31729419 | Excalibur_rep_c66449_1588   | 31.8 | 0.0 | No  |
| 1A_1 | 64701487 | GENE-0112_64                | 31.8 | 0.0 | No  |
| 1A_1 | 51755344 | IAAV1225                    | 31.8 | 0.0 | No  |
| 1A_1 | 73736483 | IAAV2072                    | 31.8 | 0.0 | No  |
| 1A_1 | 18710440 | Kukri_c10065_415            | 31.8 | 0.0 | No  |
| 1A_1 | 19637484 | Kukri_c10239_2186           | 31.8 | 0.0 | No  |
| 1A_1 | 16764323 | Kukri_c25215_124            | 31.8 | 0.0 | No  |
| 1A_1 | 14643361 | Kukri_c26093_861            | 31.8 | 0.0 | No  |
| 1A_1 | 51708387 | Kukri_c3582_87              | 31.8 | 0.0 | No  |
| 1A_1 | 38705475 | Ra_c4159_2716               | 31.8 | 0.0 | No  |
| 1A_1 | 47699432 | Ra_c58315_265               | 31.8 | 0.0 | No  |
| 1A_1 | 44764361 | Ra_c6038_588                | 31.8 | 0.0 | No  |
| 1A_1 | 51657427 | RAC875_c16080_777           | 31.8 | 0.0 | No  |
| 1A_1 | 21683451 | RAC875_c23081_141           | 31.8 | 0.0 | No  |
| 1A_1 | 55662342 | RAC875_c25507_551           | 31.8 | 0.0 | No  |
| 1A_1 | 40619408 | RAC875_c2734_135            | 31.8 | 0.0 | No  |
| 1A_1 | 48606368 | RAC875_c31276_1128          | 31.8 | 0.0 | No  |
| 1A_1 | 55663302 | RAC875_c41275_131           | 31.8 | 0.0 | No  |
| 1A_1 | 58697313 | RAC875_c43643_176           | 31.8 | 0.0 | No  |
| 1A_1 | 65809475 | RFL_Contig3203_1971         | 31.8 | 0.0 | No  |
| 1A_1 | 15717375 | Tdurum_contig31304_527      | 31.8 | 0.0 | No  |
| 1A_1 | 25628321 | wsnp_Ex_c12165_19452361     | 31.8 | 0.0 | No  |
| 1A_1 | 26801345 | wsnp_Ex_c12336_19686808     | 31.8 | 0.0 | No  |
| 1A_1 | 32688412 | wsnp_Ex_c16592_25117132     | 31.8 | 0.0 | No  |
| 1A_1 | 50645321 | wsnp_Ex_c21193_30320134     | 31.8 | 0.0 | No  |
| 1A_1 | 23696337 | wsnp_Ex_c21336_30465618     | 31.8 | 0.0 | No  |
| 1A_1 | 31681367 | wsnp_Ex_c34344_42677360     | 31.8 | 0.0 | No  |
| 1A_1 | 49760309 | wsnp_Ex_c5192_9203100       | 31.8 | 0.0 | No  |
| 1A_1 | 20748366 | wsnp_Ex_c5192_9203682       | 31.8 | 0.0 | No  |
| 1A_1 | 18603508 | wsnp_Ex_c534_1058778        | 31.8 | 0.0 | No  |
| 1A_1 | 18680391 | wsnp_Ex_c56097_58352130     | 31.8 | 0.0 | No  |
| 1A_1 | 45623485 | wsnp_JD_c13903_13781269     | 31.8 | 0.0 | No  |
| 1A_1 | 59727349 | wsnp_Ku_c21356_31093507     | 31.8 | 0.0 | No  |
| 1A_1 | 36767440 | wsnp_Ku_c24239_34199356     | 31.8 | 0.0 | No  |
| 1A_1 | 21729357 | wsnp_Ku_c2815_5317230       | 31.8 | 0.0 | No  |
| 1A_1 | 38743479 | wsnp_Ra_c37745_45806931     | 31.8 | 0.0 | No  |
| 1A_1 | 71689351 | wsnp_Ra_c7818_13376644      | 31.8 | 0.5 | No  |
| 1A_1 | 67752328 | IACX4386                    | 32.2 | 1.0 | Yes |
| 1A_1 | 58728356 | IAAV213                     | 33.3 | 0.0 | Yes |
| 1A_1 | 61660371 | wsnp_Ex_c25734_34995416     | 33.3 | 0.0 | No  |
| 1A_1 | 11790437 | wsnp_Ex_rep_c73818_71733737 | 33.3 | 0.0 | No  |
| 1A_1 | 51717319 | wsnp_Ku_c557_1166684        | 33.3 | 1.4 | No  |
| 1A_1 | 21642326 | IAAV4099                    | 34.7 | 0.0 | Yes |
| 1A_1 | 19642410 | IAAV7203                    | 34.7 | 0.0 | No  |

|      |                          |                          |      |     |     |
|------|--------------------------|--------------------------|------|-----|-----|
| 1A_1 | 28745340                 | Kukri_c22434_513         | 34.7 | 0.0 | No  |
| 1A_1 | 15800471                 | Ra_c2895_591             | 34.7 | 0.0 | No  |
| 1A_1 | 34743372                 | wsnp_Ex_c572_1138339     | 34.7 | 0.0 | No  |
| 1A_1 | 51765355                 | wsnp_Ex_c572_1138770     | 34.7 | 0.0 | No  |
| 1A_1 | 12803398                 | wsnp_Ra_c2895_5488879    | 34.7 | 4.1 | No  |
| 1A_1 | <a href="#">wPt-4886</a> | <a href="#">wPt-4886</a> | 38.8 | 0.9 | Yes |
| 1A_1 | <a href="#">wPt-7074</a> | <a href="#">wPt-7074</a> | 39.7 | 0.5 | Yes |
| 1A_1 | 15646417                 | Excalibur_c5606_1192     | 40.3 | 0.0 | Yes |
| 1A_1 | 69612362                 | Tdurum_contig16812_256   | 40.3 | 2.3 | No  |
| 1A_1 | 24638426                 | Ku_c11769_252            | 42.5 | 1.0 | Yes |
| 1A_1 | 34614324                 | Kukri_c7579_443          | 43.5 | 0.0 | Yes |
| 1A_1 | 38742487                 | RAC875_c10090_963        | 43.5 | 0.0 | No  |
| 1A_1 | 47768469                 | RAC875_c14066_452        | 43.5 | 0.0 | No  |
| 1A_1 | 20636476                 | RAC875_rep_c111911_116   | 43.5 | 0.0 | No  |
| 1A_1 | 10623303                 | Tdurum_contig11004_400   | 43.5 | 0.0 | No  |
| 1A_1 | 15626445                 | Tdurum_contig11004_613   | 43.5 | 0.0 | No  |
| 1A_1 | 72782314                 | Tdurum_contig34019_260   | 43.5 | 0.0 | No  |
| 1A_1 | 26680320                 | Tdurum_contig56382_747   | 43.5 | 0.0 | No  |
| 1A_1 | 72748493                 | Tdurum_contig61515_259   | 43.5 | 0.0 | No  |
| 1A_1 | 48726377                 | Tdurum_contig61515_522   | 43.5 | 0.6 | No  |
| 1A_1 | <a href="#">wPt-8478</a> | <a href="#">wPt-8478</a> | 44.1 | 0.1 | Yes |
| 1A_1 | <a href="#">wPt-5968</a> | <a href="#">wPt-5968</a> | 44.3 | 1.2 | Yes |
| 1A_1 | 52616361                 | Excalibur_rep_c77404_218 | 45.4 | 0.2 | Yes |
| 1A_1 | 70788380                 | Kukri_c46010_146         | 45.6 | 0.0 | Yes |
| 1A_1 | 30754343                 | Kukri_c82555_88          | 45.6 | 0.0 | No  |
| 1A_1 | 61693455                 | Ra_c22663_367            | 45.6 | 0.0 | No  |
| 1A_1 | 16775476                 | Tdurum_contig13946_241   | 45.6 | 0.0 | No  |
| 1A_1 | 46638437                 | Tdurum_contig13946_329   | 45.6 | 0.0 | No  |
| 1A_1 | 32755503                 | Tdurum_contig29280_216   | 45.6 | 0.0 | No  |
| 1A_1 | 11713430                 | Tdurum_contig50355_269   | 45.6 | 0.0 | No  |
| 1A_1 | 26764360                 | Tdurum_contig50355_685   | 45.6 | 0.0 | No  |
| 1A_1 | 26675318                 | Tdurum_contig77289_179   | 45.6 | 0.0 | No  |
| 1A_1 | 34658330                 | wsnp_Ex_c31983_40709607  | 45.6 | 0.0 | No  |
| 1A_1 | 36719316                 | wsnp_Ex_c31983_40709866  | 45.6 | 2.4 | No  |
| 1A_1 | <a href="#">wPt-3698</a> | <a href="#">wPt-3698</a> | 48.0 | 0.7 | Yes |
| 1A_1 | 69634410                 | BobWhite_c4384_262       | 48.8 | 0.0 | Yes |
| 1A_1 | 34729477                 | BobWhite_c48591_394      | 48.8 | 0.0 | No  |
| 1A_1 | 44727502                 | Excalibur_c7026_2635     | 48.8 | 0.0 | No  |
| 1A_1 | 69669448                 | Kukri_c12534_559         | 48.8 | 0.0 | No  |
| 1A_1 | 36720409                 | Kukri_c13136_1363        | 48.8 | 0.0 | No  |
| 1A_1 | 26733495                 | Kukri_c31964_109         | 48.8 | 0.0 | No  |
| 1A_1 | 22674464                 | Kukri_c31964_56          | 48.8 | 0.0 | No  |
| 1A_1 | 56722431                 | Tdurum_contig13937_2280  | 48.8 | 0.0 | No  |
| 1A_1 | 45645320                 | Tdurum_contig41233_94    | 48.8 | 0.0 | No  |

|      |                          |                          |      |     |     |
|------|--------------------------|--------------------------|------|-----|-----|
| 1A_1 | 14608437                 | Tdurum_contig8382_300    | 48.8 | 0.0 | No  |
| 1A_1 | 41701471                 | wsnp_Ex_c15717_24067142  | 48.8 | 0.0 | No  |
| 1A_1 | 16747335                 | wsnp_JD_c9290_10155594   | 48.8 | 7.0 | No  |
| 1A_1 | <a href="#">wPt-4735</a> | <a href="#">wPt-4735</a> | 55.7 | 0.4 | Yes |
| 1A_1 | <a href="#">wPt-3560</a> | <a href="#">wPt-3560</a> | 56.2 | 0.9 | Yes |
| 1A_1 | 15605483                 | Tdurum_contig75476_167   | 57.1 | 0.1 | Yes |
| 1A_1 | 55804396                 | BobWhite_c3661_88        | 57.1 | 0.0 | Yes |
| 1A_1 | 43646336                 | BobWhite_c46501_92       | 57.1 | 0.0 | No  |
| 1A_1 | 60674407                 | BS00003761_51            | 57.1 | 0.0 | No  |
| 1A_1 | 29645378                 | BS00003802_51            | 57.1 | 0.0 | No  |
| 1A_1 | 48725343                 | BS00022443_51            | 57.1 | 0.0 | No  |
| 1A_1 | 50616307                 | BS00022738_51            | 57.1 | 0.0 | No  |
| 1A_1 | 51685417                 | BS00022977_51            | 57.1 | 0.0 | No  |
| 1A_1 | 49633498                 | BS00026453_51            | 57.1 | 0.0 | No  |
| 1A_1 | 16633399                 | BS00026917_51            | 57.1 | 0.0 | No  |
| 1A_1 | 44608335                 | BS00077492_51            | 57.1 | 0.0 | No  |
| 1A_1 | 60612385                 | BS00082266_51            | 57.1 | 0.0 | No  |
| 1A_1 | 33610325                 | BS00100287_51            | 57.1 | 0.0 | No  |
| 1A_1 | 58655300                 | CAP7_c1645_359           | 57.1 | 0.0 | No  |
| 1A_1 | 47707373                 | Ex_c27351_850            | 57.1 | 0.0 | No  |
| 1A_1 | 42677363                 | Excalibur_c105151_200    | 57.1 | 0.0 | No  |
| 1A_1 | 16647363                 | Excalibur_c20777_315     | 57.1 | 0.0 | No  |
| 1A_1 | 42799471                 | Excalibur_c20777_428     | 57.1 | 0.0 | No  |
| 1A_1 | 43742451                 | GENE-0211_139            | 57.1 | 0.0 | No  |
| 1A_1 | 40755329                 | IAAV1469                 | 57.1 | 0.0 | No  |
| 1A_1 | 54787428                 | IAAV6899                 | 57.1 | 0.0 | No  |
| 1A_1 | 34744373                 | IACX5892                 | 57.1 | 0.0 | No  |
| 1A_1 | 65633318                 | Kukri_c11891_1015        | 57.1 | 0.0 | No  |
| 1A_1 | 25629497                 | Kukri_c18434_200         | 57.1 | 0.0 | No  |
| 1A_1 | 55700381                 | RAC875_c108229_54        | 57.1 | 0.0 | No  |
| 1A_1 | 21730501                 | RAC875_c2122_159         | 57.1 | 0.0 | No  |
| 1A_1 | 69734437                 | RAC875_c29598_147        | 57.1 | 0.0 | No  |
| 1A_1 | 53650429                 | RAC875_c54245_88         | 57.1 | 0.0 | No  |
| 1A_1 | 59718477                 | RAC875_c59712_105        | 57.1 | 0.0 | No  |
| 1A_1 | 48768438                 | Tdurum_contig11756_1415  | 57.1 | 0.0 | No  |
| 1A_1 | 45666351                 | Tdurum_contig11756_264   | 57.1 | 0.0 | No  |
| 1A_1 | 64717383                 | Tdurum_contig11756_458   | 57.1 | 0.0 | No  |
| 1A_1 | 46801356                 | Tdurum_contig15335_452   | 57.1 | 0.0 | No  |
| 1A_1 | 10656301                 | Tdurum_contig20965_1446  | 57.1 | 0.0 | No  |
| 1A_1 | 35608309                 | Tdurum_contig29484_628   | 57.1 | 0.0 | No  |
| 1A_1 | 20636403                 | Tdurum_contig30956_537   | 57.1 | 0.0 | No  |
| 1A_1 | 11728508                 | Tdurum_contig50845_215   | 57.1 | 0.0 | No  |
| 1A_1 | 63791319                 | Tdurum_contig50845_82    | 57.1 | 0.0 | No  |
| 1A_1 | 15662319                 | Tdurum_contig52332_94    | 57.1 | 0.0 | No  |

|      |                          |                          |      |      |     |
|------|--------------------------|--------------------------|------|------|-----|
| 1A_1 | 41660381                 | Tdurum_contig61492_458   | 57.1 | 0.0  | No  |
| 1A_1 | 56653315                 | Tdurum_contig61492_684   | 57.1 | 0.0  | No  |
| 1A_1 | 20762469                 | Tdurum_contig75476_721   | 57.1 | 0.0  | No  |
| 1A_1 | 73800311                 | Tdurum_contig83113_134   | 57.1 | 0.0  | No  |
| 1A_1 | 44696466                 | tplb0034h06_391          | 57.1 | 0.0  | No  |
| 1A_1 | 18771424                 | wsnp_Ex_c5780_10154132   | 57.1 | 0.6  | No  |
| 1A_1 | 43603325                 | D_GDEEGVY02H7D8K_299     | 57.7 | 0.6  | Yes |
| 1A_1 | 28656406                 | RAC875_c20875_753        | 58.3 | 0.2  | Yes |
| 1A_1 | 43688410                 | Kukri_c4126_240          | 58.5 | 0.0  | Yes |
| 1A_1 | 71740379                 | BobWhite_c1265_247       | 58.5 | 0.0  | Yes |
| 1A_1 | 65606465                 | BS00023485_51            | 58.5 | 0.0  | No  |
| 1A_1 | 31717432                 | BS00065909_51            | 58.5 | 0.0  | No  |
| 1A_1 | 41791494                 | BS00081680_51            | 58.5 | 0.0  | No  |
| 1A_1 | 26798436                 | BS00103478_51            | 58.5 | 0.0  | No  |
| 1A_1 | 42755420                 | Ex_c4876_1221            | 58.5 | 0.0  | No  |
| 1A_1 | 51770302                 | Excalibur_c101903_902    | 58.5 | 0.0  | No  |
| 1A_1 | 22780317                 | Excalibur_c25891_1402    | 58.5 | 0.0  | No  |
| 1A_1 | 30785426                 | IAAV3809                 | 58.5 | 0.0  | No  |
| 1A_1 | 34785374                 | IACX11001                | 58.5 | 0.0  | No  |
| 1A_1 | 48690431                 | IACX6155                 | 58.5 | 0.0  | No  |
| 1A_1 | 58670488                 | IACX9458                 | 58.5 | 0.0  | No  |
| 1A_1 | 51801361                 | Jagger_rep_c10343_173    | 58.5 | 0.0  | No  |
| 1A_1 | 23727442                 | Kukri_c2121_1334         | 58.5 | 0.0  | No  |
| 1A_1 | 47684331                 | Kukri_c2121_2345         | 58.5 | 0.0  | No  |
| 1A_1 | 15745473                 | Kukri_c37592_531         | 58.5 | 0.0  | No  |
| 1A_1 | 62659369                 | RAC875_c23587_271        | 58.5 | 0.0  | No  |
| 1A_1 | 26622333                 | RAC875_c50463_808        | 58.5 | 0.0  | No  |
| 1A_1 | 34680487                 | Tdurum_contig42479_1624  | 58.5 | 0.0  | No  |
| 1A_1 | 25776468                 | Tdurum_contig42479_2158  | 58.5 | 0.0  | No  |
| 1A_1 | 23772370                 | Tdurum_contig42479_3110  | 58.5 | 0.0  | No  |
| 1A_1 | 47601471                 | Tdurum_contig42479_3800  | 58.5 | 0.0  | No  |
| 1A_1 | 14782497                 | Tdurum_contig44809_1626  | 58.5 | 0.0  | No  |
| 1A_1 | 20800400                 | wsnp_Ex_c1137_2183772    | 58.5 | 0.0  | No  |
| 1A_1 | 54689418                 | wsnp_Ex_c4876_8692783    | 58.5 | 0.0  | No  |
| 1A_1 | 37701397                 | wsnp_Ex_c7965_13520238   | 58.5 | 0.1  | No  |
| 1A_1 | 38661351                 | wsnp_Ex_c7252_12452995   | 58.6 |      | Yes |
| 1A_2 | <a href="#">wPt-5577</a> | <a href="#">wPt-5577</a> | 0.0  | 0.0  | Yes |
| 1A_2 | <a href="#">wPt-8245</a> | <a href="#">wPt-8245</a> | 0.0  | 12.9 | Yes |
| 1A_2 | 45703322                 | BS00032855_51            | 12.9 | 0.0  | Yes |
| 1A_2 | 53803419                 | Excalibur_rep_c71271_247 | 12.9 | 0.0  | No  |
| 1A_2 | 57795383                 | Tdurum_contig47006_1105  | 12.9 | 0.0  | No  |
| 1A_2 | 58634428                 | Tdurum_contig47006_1641  | 12.9 | 0.0  | No  |
| 1A_2 | 56629477                 | Tdurum_contig47006_2711  | 12.9 | 0.0  | No  |
| 1A_2 | 74647506                 | Tdurum_contig9144_1571   | 12.9 | 0.0  | No  |

|      |                          |                           |      |     |     |
|------|--------------------------|---------------------------|------|-----|-----|
| 1A_2 | 15649491                 | tplb0059i08_441           | 12.9 | 0.0 | No  |
| 1A_2 | 31635360                 | wsnp_Ex_c2918_5381441     | 12.9 | 0.0 | No  |
| 1A_2 | 32752313                 | wsnp_Ex_c34694_42959047   | 12.9 | 4.2 | No  |
| 1A_2 | <a href="#">wPt-4709</a> | <a href="#">wPt-4709</a>  | 17.1 | 0.0 | Yes |
| 1A_2 | <a href="#">wPt-6754</a> | <a href="#">wPt-6754</a>  | 17.1 | 0.0 | No  |
| 1A_2 | <a href="#">wPt-3934</a> | <a href="#">wPt-3934</a>  | 17.1 | 0.3 | No  |
| 1A_2 | <a href="#">wPt-6853</a> | <a href="#">wPt-6853</a>  | 17.4 | 0.0 | Yes |
| 1A_2 | <a href="#">wPt-1310</a> | <a href="#">wPt-1310</a>  | 17.4 | 0.0 | No  |
| 1A_2 | 71714499                 | BobWhite_c1027_1127       | 17.5 | 0.0 | Yes |
| 1A_2 | 20667410                 | BobWhite_c44947_277       | 17.5 | 0.0 | No  |
| 1A_2 | 18740464                 | BS00021990_51             | 17.5 | 0.0 | No  |
| 1A_2 | 48624416                 | BS00035273_51             | 17.5 | 0.0 | No  |
| 1A_2 | 45618509                 | BS00036189_51             | 17.5 | 0.0 | No  |
| 1A_2 | 44693466                 | BS00056823_51             | 17.5 | 0.0 | No  |
| 1A_2 | 41782316                 | BS00063847_51             | 17.5 | 0.0 | No  |
| 1A_2 | 51639445                 | BS00064087_51             | 17.5 | 0.0 | No  |
| 1A_2 | 14682327                 | BS00070695_51             | 17.5 | 0.0 | No  |
| 1A_2 | 23638305                 | BS00070991_51             | 17.5 | 0.0 | No  |
| 1A_2 | 55729317                 | BS00075271_51             | 17.5 | 0.0 | No  |
| 1A_2 | 54742356                 | D_contig14466_410         | 17.5 | 0.0 | No  |
| 1A_2 | 60795497                 | Excalibur_c10538_1153     | 17.5 | 0.0 | No  |
| 1A_2 | 29708399                 | Excalibur_c12932_2102     | 17.5 | 0.0 | No  |
| 1A_2 | 29779358                 | Excalibur_c27376_74       | 17.5 | 0.0 | No  |
| 1A_2 | 24691324                 | Excalibur_c46365_304      | 17.5 | 0.0 | No  |
| 1A_2 | 42602322                 | Excalibur_c46365_442      | 17.5 | 0.0 | No  |
| 1A_2 | 60647505                 | Excalibur_rep_c67492_1119 | 17.5 | 0.0 | No  |
| 1A_2 | 38806444                 | GENE-0543_1074            | 17.5 | 0.0 | No  |
| 1A_2 | 48686457                 | GENE-0543_113             | 17.5 | 0.0 | No  |
| 1A_2 | 18609402                 | GENE-0543_577             | 17.5 | 0.0 | No  |
| 1A_2 | 58801392                 | IAAV2162                  | 17.5 | 0.0 | No  |
| 1A_2 | 19807301                 | IAAV4238                  | 17.5 | 0.0 | No  |
| 1A_2 | 25664352                 | IAAV4435                  | 17.5 | 0.0 | No  |
| 1A_2 | 51759499                 | IAAV8446                  | 17.5 | 0.0 | No  |
| 1A_2 | 64725372                 | Ku_c32704_43              | 17.5 | 0.0 | No  |
| 1A_2 | 25681485                 | Kukri_c4204_1346          | 17.5 | 0.0 | No  |
| 1A_2 | 62760340                 | Kukri_c4204_1673          | 17.5 | 0.0 | No  |
| 1A_2 | 24796455                 | Kukri_c4204_1946          | 17.5 | 0.0 | No  |
| 1A_2 | 17735324                 | Kukri_c44201_497          | 17.5 | 0.0 | No  |
| 1A_2 | 18710406                 | Kukri_c47559_289          | 17.5 | 0.0 | No  |
| 1A_2 | 70797509                 | Kukri_c65610_572          | 17.5 | 0.0 | No  |
| 1A_2 | 71780488                 | Kukri_c8527_53            | 17.5 | 0.0 | No  |
| 1A_2 | 18725415                 | Kukri_rep_c115657_255     | 17.5 | 0.0 | No  |
| 1A_2 | 22602372                 | Kukri_rep_c69829_150      | 17.5 | 0.0 | No  |
| 1A_2 | 30718499                 | RAC875_c26801_179         | 17.5 | 0.0 | No  |

|      |                          |                             |      |     |     |
|------|--------------------------|-----------------------------|------|-----|-----|
| 1A_2 | 22601461                 | RAC875_c43002_382           | 17.5 | 0.0 | No  |
| 1A_2 | 16748469                 | RAC875_c5119_2696           | 17.5 | 0.0 | No  |
| 1A_2 | 11606334                 | RAC875_c51346_99            | 17.5 | 0.0 | No  |
| 1A_2 | 16627361                 | RAC875_c52947_84            | 17.5 | 0.0 | No  |
| 1A_2 | 41747469                 | RAC875_c57566_61            | 17.5 | 0.0 | No  |
| 1A_2 | 64737310                 | RAC875_c62550_470           | 17.5 | 0.0 | No  |
| 1A_2 | 64684349                 | RAC875_c63359_1446          | 17.5 | 0.0 | No  |
| 1A_2 | 59788428                 | Tdurum_contig11349_810      | 17.5 | 0.0 | No  |
| 1A_2 | 16695449                 | Tdurum_contig29886_139      | 17.5 | 0.0 | No  |
| 1A_2 | 72617476                 | Tdurum_contig70803_475      | 17.5 | 0.0 | No  |
| 1A_2 | 41600409                 | Tdurum_contig84252_155      | 17.5 | 0.0 | No  |
| 1A_2 | 25654461                 | wsnp_Ex_c11939_19147421     | 17.5 | 0.0 | No  |
| 1A_2 | 23627463                 | wsnp_Ex_c11939_19147514     | 17.5 | 0.0 | No  |
| 1A_2 | 65791428                 | wsnp_Ex_c11939_19147602     | 17.5 | 0.0 | No  |
| 1A_2 | 23699323                 | wsnp_Ex_c11939_19147790     | 17.5 | 0.0 | No  |
| 1A_2 | 18707407                 | wsnp_Ex_c12932_20486842     | 17.5 | 0.0 | No  |
| 1A_2 | 12720366                 | wsnp_Ex_c1557_2973321       | 17.5 | 0.0 | No  |
| 1A_2 | 21789500                 | wsnp_Ex_c1861_3507281       | 17.5 | 0.0 | No  |
| 1A_2 | 26752462                 | wsnp_Ex_c271_521429         | 17.5 | 0.0 | No  |
| 1A_2 | 15651460                 | wsnp_Ex_rep_c67492_66096650 | 17.5 | 0.0 | No  |
| 1A_2 | 23709468                 | wsnp_Ku_c12441_20092792     | 17.5 | 0.0 | No  |
| 1A_2 | 23682314                 | wsnp_Ku_c5687_10068945      | 17.5 | 0.0 | No  |
| 1A_2 | 49688432                 | wsnp_Ku_c754_1557338        | 17.5 | 0.0 | No  |
| 1A_2 | 44804502                 | wsnp_Ra_c59303_60669172     | 17.5 | 0.0 | No  |
| 1A_2 | 66772335                 | wsnp_RFL_Contig3850_4199825 | 17.5 | 0.0 | No  |
| 1A_2 | 56720494                 | wsnp_RFL_Contig3881_4265086 | 17.5 | 0.0 | No  |
| 1A_2 | <a href="#">wPt-0497</a> | <a href="#">wPt-0497</a>    | 17.5 | 0.0 | Yes |
| 1A_2 | <a href="#">wPt-1011</a> | <a href="#">wPt-1011</a>    | 17.5 | 0.0 | Yes |
| 1A_2 | <a href="#">wPt-8644</a> | <a href="#">wPt-8644</a>    | 17.5 | 0.0 | Yes |
| 1A_2 | <a href="#">wPt-6274</a> | <a href="#">wPt-6274</a>    | 17.5 | 0.0 | Yes |
| 1A_2 | <a href="#">wPt-5077</a> | <a href="#">wPt-5077</a>    | 17.5 | 0.0 | Yes |
| 1A_2 | <a href="#">wPt-9985</a> | <a href="#">wPt-9985</a>    | 17.6 | 0.1 | Yes |
| 1A_2 | <a href="#">wPt-1010</a> | <a href="#">wPt-1010</a>    | 17.7 | 0.0 | Yes |
| 1A_2 | <a href="#">tPt-1419</a> | <a href="#">tPt-1419</a>    | 17.7 | 0.1 | Yes |
| 1A_2 | 13633462                 | BS00084995_51               | 17.8 | 1.2 | Yes |
| 1A_2 | <a href="#">tPt-7724</a> | <a href="#">tPt-7724</a>    | 19.0 | 0.4 | Yes |
| 1A_2 | 64695411                 | BS00011521_51               | 19.5 | 0.0 | Yes |
| 1A_2 | 36774301                 | BS00022824_51               | 19.5 | 0.0 | No  |
| 1A_2 | 29727381                 | BS00068074_51               | 19.5 | 0.0 | No  |
| 1A_2 | 38643481                 | BS00106641_51               | 19.5 | 0.0 | No  |
| 1A_2 | 13760348                 | Kukri_c17324_261            | 19.5 | 0.0 | No  |
| 1A_2 | 55807505                 | Kukri_c47669_204            | 19.5 | 0.0 | No  |
| 1A_2 | 69647505                 | RAC875_c68350_61            | 19.5 | 0.0 | No  |
| 1A_2 | 60743409                 | wsnp_Ex_c18499_27344859     | 19.5 | 0.0 | No  |



|      |          |                         |      |     |     |
|------|----------|-------------------------|------|-----|-----|
| 1A_2 | 53720314 | wsnp_Ex_c9918_16332583  | 19.5 |     | No  |
| 1B_1 | 35646347 | BS00022022_51           | 0.0  | 0.0 | Yes |
| 1B_1 | 60677411 | BS00022343_51           | 0.0  | 0.0 | No  |
| 1B_1 | 34732303 | BS00022619_51           | 0.0  | 0.0 | No  |
| 1B_1 | 19712348 | BS00022878_51           | 0.0  | 0.0 | No  |
| 1B_1 | 26640360 | BS00022920_51           | 0.0  | 0.0 | No  |
| 1B_1 | 55720311 | BS00085546_51           | 0.0  | 0.0 | No  |
| 1B_1 | 58672440 | BS00090201_51           | 0.0  | 0.0 | No  |
| 1B_1 | 33761427 | BS00107799_51           | 0.0  | 0.0 | No  |
| 1B_1 | 10615389 | Excalibur_c14801_451    | 0.0  | 0.0 | No  |
| 1B_1 | 34603436 | GENE-0107_807           | 0.0  | 0.0 | No  |
| 1B_1 | 23692363 | IACX3408                | 0.0  | 0.0 | No  |
| 1B_1 | 45808418 | JD_c3116_778            | 0.0  | 0.0 | No  |
| 1B_1 | 26603328 | Ku_c20478_390           | 0.0  | 0.0 | No  |
| 1B_1 | 25646335 | Kukri_c13188_256        | 0.0  | 0.0 | No  |
| 1B_1 | 59662471 | Kukri_c7905_226         | 0.0  | 0.0 | No  |
| 1B_1 | 49668320 | RAC875_c19014_725       | 0.0  | 0.0 | No  |
| 1B_1 | 30607335 | RAC875_c87890_234       | 0.0  | 0.0 | No  |
| 1B_1 | 70758384 | RAC875_rep_c119728_146  | 0.0  | 0.0 | No  |
| 1B_1 | 69730489 | TA003238-0490           | 0.0  | 0.0 | No  |
| 1B_1 | 72680412 | TA003725-0553           | 0.0  | 0.0 | No  |
| 1B_1 | 60794344 | Tdurum_contig10026_1493 | 0.0  | 0.0 | No  |
| 1B_1 | 34796371 | Tdurum_contig29363_461  | 0.0  | 0.0 | No  |
| 1B_1 | 67785333 | Tdurum_contig29363_511  | 0.0  | 0.0 | No  |
| 1B_1 | 13668440 | Tdurum_contig30195_318  | 0.0  | 0.0 | No  |
| 1B_1 | 46785360 | Tdurum_contig31094_386  | 0.0  | 0.0 | No  |
| 1B_1 | 14627472 | Tdurum_contig32584_219  | 0.0  | 0.0 | No  |
| 1B_1 | 42719430 | Tdurum_contig44232_132  | 0.0  | 0.0 | No  |
| 1B_1 | 45640485 | Tdurum_contig59449_1462 | 0.0  | 0.0 | No  |
| 1B_1 | 16631411 | Tdurum_contig59449_249  | 0.0  | 0.0 | No  |
| 1B_1 | 29626491 | Tdurum_contig59449_400  | 0.0  | 0.0 | No  |
| 1B_1 | 42706445 | Tdurum_contig60509_232  | 0.0  | 0.0 | No  |
| 1B_1 | 70613477 | Tdurum_contig81102_102  | 0.0  | 0.0 | No  |
| 1B_1 | 44794349 | Tdurum_contig83937_560  | 0.0  | 0.0 | No  |
| 1B_1 | 35677402 | Tdurum_contig9506_524   | 0.0  | 0.0 | No  |
| 1B_1 | 40617376 | Tdurum_contig98080_171  | 0.0  | 0.0 | No  |
| 1B_1 | 35743455 | wsnp_Ex_c4561_8184576   | 0.0  | 0.0 | No  |
| 1B_1 | 33659480 | wsnp_Ex_c5679_9976893   | 0.0  | 0.0 | No  |
| 1B_1 | 24750315 | wsnp_Ex_c6611_11451949  | 0.0  | 0.0 | No  |
| 1B_1 | 47651362 | wsnp_Ex_c6611_11452297  | 0.0  | 0.0 | No  |
| 1B_1 | 55608502 | wsnp_Ra_c19148_28288923 | 0.0  | 2.0 | No  |
| 1B_1 | wPt-2389 | wPt-2389                | 2.0  | 1.5 | Yes |
| 1B_1 | wPt-3451 | wPt-3451                | 3.5  | 1.2 | Yes |
| 1B_1 | 15663311 | BobWhite_c346_253       | 4.7  | 0.0 | Yes |

|      |          |                             |     |     |     |
|------|----------|-----------------------------|-----|-----|-----|
| 1B_1 | 55607329 | BS00069723_51               | 4.7 | 0.0 | No  |
| 1B_1 | 45690460 | GENE-0505_443               | 4.7 | 0.0 | No  |
| 1B_1 | 48706507 | Kukri_c27851_69             | 4.7 | 0.0 | No  |
| 1B_1 | 56748340 | Kukri_c51474_334            | 4.7 | 0.0 | No  |
| 1B_1 | 72779318 | Kukri_c62050_194            | 4.7 | 0.0 | No  |
| 1B_1 | 64617498 | Ra_c3083_982                | 4.7 | 0.0 | No  |
| 1B_1 | 38807409 | RAC875_c865_1936            | 4.7 | 0.0 | No  |
| 1B_1 | 17727358 | RAC875_s105188_92           | 4.7 | 0.0 | No  |
| 1B_1 | 57612350 | Tdurum_contig115_131        | 4.7 | 0.0 | No  |
| 1B_1 | 51784443 | Tdurum_contig20191_171      | 4.7 | 0.0 | No  |
| 1B_1 | 64792441 | Tdurum_contig63335_321      | 4.7 | 0.0 | No  |
| 1B_1 | 47640345 | Tdurum_contig68228_206      | 4.7 | 0.0 | No  |
| 1B_1 | 50670331 | wsnp_CAP11_c4558_2144436    | 4.7 | 0.0 | No  |
| 1B_1 | 26656428 | wsnp_Ex_c2025_3799847       | 4.7 | 0.0 | No  |
| 1B_1 | 21637398 | wsnp_Ex_c3681_6715277       | 4.7 | 0.0 | No  |
| 1B_1 | 74678507 | wsnp_Ex_c3681_6716255       | 4.7 | 0.0 | No  |
| 1B_1 | 28686327 | wsnp_Ex_rep_c66846_65240088 | 4.7 | 0.0 | No  |
| 1B_1 | 51632392 | wsnp_Ra_c2027_3943938       | 4.7 | 0.0 | No  |
| 1B_1 | 65786326 | wsnp_Ra_c2027_3945713       | 4.7 | 0.0 | No  |
| 1B_1 | 26758443 | wsnp_Ra_c23758_33291657     | 4.7 | 0.8 | No  |
| 1B_1 | 35651359 | Kukri_rep_c69810_502        | 5.6 | 0.0 | Yes |
| 1B_1 | 52746436 | BobWhite_c1967_175          | 5.6 | 0.0 | Yes |
| 1B_1 | 15687442 | BobWhite_c1967_388          | 5.6 | 0.0 | No  |
| 1B_1 | 52765302 | BS00011918_51               | 5.6 | 0.0 | No  |
| 1B_1 | 70745412 | BS00023142_51               | 5.6 | 0.0 | No  |
| 1B_1 | 23619423 | BS00034925_51               | 5.6 | 0.0 | No  |
| 1B_1 | 28679504 | BS00071465_51               | 5.6 | 0.0 | No  |
| 1B_1 | 50746407 | BS00078431_51               | 5.6 | 0.0 | No  |
| 1B_1 | 66725472 | BS00107420_51               | 5.6 | 0.0 | No  |
| 1B_1 | 71692392 | CAP7_c3456_113              | 5.6 | 0.0 | No  |
| 1B_1 | 28803308 | Excalibur_c50665_1323       | 5.6 | 0.0 | No  |
| 1B_1 | 16768491 | Excalibur_rep_c105376_485   | 5.6 | 0.0 | No  |
| 1B_1 | 71719510 | GENE-0142_178               | 5.6 | 0.0 | No  |
| 1B_1 | 42606341 | IAAV7383                    | 5.6 | 0.0 | No  |
| 1B_1 | 55701475 | IAAV8763                    | 5.6 | 0.0 | No  |
| 1B_1 | 48721450 | IACX15424                   | 5.6 | 0.0 | No  |
| 1B_1 | 41787337 | Kukri_c667_1073             | 5.6 | 0.0 | No  |
| 1B_1 | 71657486 | Kukri_c67707_114            | 5.6 | 0.0 | No  |
| 1B_1 | 51703394 | Ra_c26829_375               | 5.6 | 0.0 | No  |
| 1B_1 | 36614467 | RAC875_c3617_396            | 5.6 | 0.0 | No  |
| 1B_1 | 45742414 | RAC875_c56417_377           | 5.6 | 0.0 | No  |
| 1B_1 | 67801469 | TA001197-0204               | 5.6 | 0.0 | No  |
| 1B_1 | 69621413 | Tdurum_contig15593_407      | 5.6 | 0.0 | No  |
| 1B_1 | 32690478 | Tdurum_contig28316_228      | 5.6 | 0.0 | No  |

|      |          |                         |      |     |     |
|------|----------|-------------------------|------|-----|-----|
| 1B_1 | 43710338 | Tdurum_contig28316_243  | 5.6  | 0.0 | No  |
| 1B_1 | 72751327 | Tdurum_contig28316_442  | 5.6  | 0.0 | No  |
| 1B_1 | 24758365 | Tdurum_contig44255_814  | 5.6  | 0.0 | No  |
| 1B_1 | 73620300 | Tdurum_contig53864_617  | 5.6  | 0.0 | No  |
| 1B_1 | 48687502 | Tdurum_contig56873_1237 | 5.6  | 0.0 | No  |
| 1B_1 | 31678329 | Tdurum_contig56874_562  | 5.6  | 0.0 | No  |
| 1B_1 | 15725507 | Tdurum_contig57183_368  | 5.6  | 0.0 | No  |
| 1B_1 | 35646494 | Tdurum_contig57183_581  | 5.6  | 0.0 | No  |
| 1B_1 | 42690342 | Tdurum_contig60052_184  | 5.6  | 0.0 | No  |
| 1B_1 | 25778440 | Tdurum_contig76481_798  | 5.6  | 0.0 | No  |
| 1B_1 | 71659408 | wsnp_BE446240B_Ta_2_1   | 5.6  | 0.0 | No  |
| 1B_1 | 45788478 | wsnp_BE446240B_Ta_2_3   | 5.6  | 0.0 | No  |
| 1B_1 | 17634427 | wsnp_Ku_c20139_29729256 | 5.6  | 0.0 | No  |
| 1B_1 | 54644413 | wsnp_Ku_c24323_34285350 | 5.6  | 1.1 | No  |
| 1B_1 | 14767431 | Tdurum_contig10217_1081 | 6.7  | 4.3 | Yes |
| 1B_1 | 56631345 | BS00071082_51           | 10.9 | 0.0 | Yes |
| 1B_1 | 12765501 | BS00087015_51           | 10.9 | 0.0 | No  |
| 1B_1 | 56763456 | RAC875_c24337_1280      | 10.9 | 0.0 | No  |
| 1B_1 | 22621499 | Tdurum_contig25434_209  | 10.9 | 1.3 | No  |
| 1B_1 | 53654304 | BS00062740_51           | 12.2 | 0.0 | Yes |
| 1B_1 | 11619400 | Excalibur_c29029_424    | 12.2 | 0.0 | No  |
| 1B_1 | 34654371 | Excalibur_c39191_82     | 12.2 | 0.0 | No  |
| 1B_1 | 68786360 | Kukri_rep_c108436_534   | 12.2 | 0.0 | No  |
| 1B_1 | 13733383 | RAC875_c22350_1108      | 12.2 | 0.0 | No  |
| 1B_1 | 72672331 | RAC875_c39721_709       | 12.2 | 0.0 | No  |
| 1B_1 | 19758492 | Tdurum_contig52053_149  | 12.2 | 0.0 | No  |
| 1B_1 | 12751435 | Tdurum_contig57247_383  | 12.2 | 0.0 | No  |
| 1B_1 | 72626353 | Tdurum_contig57247_482  | 12.2 | 0.2 | No  |
| 1B_1 | 65728455 | BS00065117_51           | 12.4 | 0.7 | Yes |
| 1B_1 | 39714370 | wsnp_Ex_c24700_33953160 | 13.1 | 0.0 | Yes |
| 1B_1 | 29702343 | BobWhite_c1456_615      | 13.1 | 0.0 | Yes |
| 1B_1 | 46691309 | BobWhite_c15603_69      | 13.1 | 0.0 | No  |
| 1B_1 | 16727510 | BobWhite_c18583_280     | 13.1 | 0.0 | No  |
| 1B_1 | 27728422 | BobWhite_c22981_218     | 13.1 | 0.0 | No  |
| 1B_1 | 74764364 | BobWhite_c3669_329      | 13.1 | 0.0 | No  |
| 1B_1 | 71673408 | BobWhite_c7333_76       | 13.1 | 0.0 | No  |
| 1B_1 | 62656468 | BobWhite_rep_c66146_237 | 13.1 | 0.0 | No  |
| 1B_1 | 49668308 | BS00003600_51           | 13.1 | 0.0 | No  |
| 1B_1 | 29613350 | BS00009731_51           | 13.1 | 0.0 | No  |
| 1B_1 | 11742331 | BS00011333_51           | 13.1 | 0.0 | No  |
| 1B_1 | 26671469 | BS00018461_51           | 13.1 | 0.0 | No  |
| 1B_1 | 24726408 | BS00022023_51           | 13.1 | 0.0 | No  |
| 1B_1 | 67667349 | BS00022085_51           | 13.1 | 0.0 | No  |
| 1B_1 | 31615463 | BS00022722_51           | 13.1 | 0.0 | No  |

|      |          |                       |      |     |    |
|------|----------|-----------------------|------|-----|----|
| 1B_1 | 26701468 | BS00023302_51         | 13.1 | 0.0 | No |
| 1B_1 | 72635403 | BS00029345_51         | 13.1 | 0.0 | No |
| 1B_1 | 38670447 | BS00034018_51         | 13.1 | 0.0 | No |
| 1B_1 | 74638307 | BS00036121_51         | 13.1 | 0.0 | No |
| 1B_1 | 64615443 | BS00036333_51         | 13.1 | 0.0 | No |
| 1B_1 | 17743365 | BS00037306_51         | 13.1 | 0.0 | No |
| 1B_1 | 39649386 | BS00038778_51         | 13.1 | 0.0 | No |
| 1B_1 | 58673346 | BS00041010_51         | 13.1 | 0.0 | No |
| 1B_1 | 51741348 | BS00047700_51         | 13.1 | 0.0 | No |
| 1B_1 | 24773378 | BS00050126_51         | 13.1 | 0.0 | No |
| 1B_1 | 49753429 | BS00050457_51         | 13.1 | 0.0 | No |
| 1B_1 | 71784323 | BS00052089_51         | 13.1 | 0.0 | No |
| 1B_1 | 33701308 | BS00062770_51         | 13.1 | 0.0 | No |
| 1B_1 | 47756432 | BS00062942_51         | 13.1 | 0.0 | No |
| 1B_1 | 38800331 | BS00063866_51         | 13.1 | 0.0 | No |
| 1B_1 | 22650468 | BS00065139_51         | 13.1 | 0.0 | No |
| 1B_1 | 65650376 | BS00066040_51         | 13.1 | 0.0 | No |
| 1B_1 | 42724496 | BS00068779_51         | 13.1 | 0.0 | No |
| 1B_1 | 38640474 | BS00070623_51         | 13.1 | 0.0 | No |
| 1B_1 | 47620484 | BS00073373_51         | 13.1 | 0.0 | No |
| 1B_1 | 53808387 | BS00073603_51         | 13.1 | 0.0 | No |
| 1B_1 | 56616506 | BS00077353_51         | 13.1 | 0.0 | No |
| 1B_1 | 63622481 | BS00087451_51         | 13.1 | 0.0 | No |
| 1B_1 | 51751355 | BS00088264_51         | 13.1 | 0.0 | No |
| 1B_1 | 70608496 | BS00091640_51         | 13.1 | 0.0 | No |
| 1B_1 | 43765346 | BS00101500_51         | 13.1 | 0.0 | No |
| 1B_1 | 52610315 | CAP12_c3646_110       | 13.1 | 0.0 | No |
| 1B_1 | 67611465 | CAP7_rep_c12580_266   | 13.1 | 0.0 | No |
| 1B_1 | 13632336 | CAP7_rep_c7114_55     | 13.1 | 0.0 | No |
| 1B_1 | 53688424 | CAP8_c4506_82         | 13.1 | 0.0 | No |
| 1B_1 | 37644441 | Ex_c19477_336         | 13.1 | 0.0 | No |
| 1B_1 | 60663454 | Ex_c2051_225          | 13.1 | 0.0 | No |
| 1B_1 | 38746347 | Ex_c34070_464         | 13.1 | 0.0 | No |
| 1B_1 | 51673310 | Excalibur_c15885_1145 | 13.1 | 0.0 | No |
| 1B_1 | 11663305 | Excalibur_c1729_841   | 13.1 | 0.0 | No |
| 1B_1 | 46629453 | Excalibur_c20228_135  | 13.1 | 0.0 | No |
| 1B_1 | 17741338 | Excalibur_c23779_474  | 13.1 | 0.0 | No |
| 1B_1 | 43728319 | Excalibur_c27675_912  | 13.1 | 0.0 | No |
| 1B_1 | 69726492 | Excalibur_c3140_697   | 13.1 | 0.0 | No |
| 1B_1 | 27774368 | Excalibur_c33494_224  | 13.1 | 0.0 | No |
| 1B_1 | 29786473 | Excalibur_c40240_78   | 13.1 | 0.0 | No |
| 1B_1 | 43805338 | Excalibur_c4082_370   | 13.1 | 0.0 | No |
| 1B_1 | 25803503 | Excalibur_c41211_311  | 13.1 | 0.0 | No |
| 1B_1 | 50696416 | Excalibur_c5052_151   | 13.1 | 0.0 | No |

|      |          |                          |      |     |    |
|------|----------|--------------------------|------|-----|----|
| 1B_1 | 50620406 | Excalibur_c55805_316     | 13.1 | 0.0 | No |
| 1B_1 | 16671392 | Excalibur_c6497_535      | 13.1 | 0.0 | No |
| 1B_1 | 45807398 | Excalibur_rep_c66306_499 | 13.1 | 0.0 | No |
| 1B_1 | 21672454 | Excalibur_rep_c74235_231 | 13.1 | 0.0 | No |
| 1B_1 | 23701508 | GENE-0116_102            | 13.1 | 0.0 | No |
| 1B_1 | 43782391 | GENE-1214_159            | 13.1 | 0.0 | No |
| 1B_1 | 25688325 | IAAV2546                 | 13.1 | 0.0 | No |
| 1B_1 | 40792467 | IAAV4491                 | 13.1 | 0.0 | No |
| 1B_1 | 39727493 | IAAV5269                 | 13.1 | 0.0 | No |
| 1B_1 | 17687316 | IAAV6919                 | 13.1 | 0.0 | No |
| 1B_1 | 42627300 | IAAV7757                 | 13.1 | 0.0 | No |
| 1B_1 | 42728364 | IAAV8440                 | 13.1 | 0.0 | No |
| 1B_1 | 67742342 | IAAV8661                 | 13.1 | 0.0 | No |
| 1B_1 | 41677463 | IACX1008                 | 13.1 | 0.0 | No |
| 1B_1 | 19786432 | IACX8452                 | 13.1 | 0.0 | No |
| 1B_1 | 21653300 | IACX9203                 | 13.1 | 0.0 | No |
| 1B_1 | 19764305 | JD_c10376_670            | 13.1 | 0.0 | No |
| 1B_1 | 63607400 | JD_c29157_213            | 13.1 | 0.0 | No |
| 1B_1 | 45763384 | Ku_c12031_980            | 13.1 | 0.0 | No |
| 1B_1 | 17765392 | Ku_c20833_518            | 13.1 | 0.0 | No |
| 1B_1 | 16707350 | Ku_c28949_178            | 13.1 | 0.0 | No |
| 1B_1 | 21719483 | Ku_c31251_565            | 13.1 | 0.0 | No |
| 1B_1 | 17713489 | Ku_c56327_481            | 13.1 | 0.0 | No |
| 1B_1 | 36714412 | Ku_c62848_956            | 13.1 | 0.0 | No |
| 1B_1 | 17658449 | Kukri_c100591_224        | 13.1 | 0.0 | No |
| 1B_1 | 51665469 | Kukri_c10308_342         | 13.1 | 0.0 | No |
| 1B_1 | 27649302 | Kukri_c10593_1064        | 13.1 | 0.0 | No |
| 1B_1 | 56795437 | Kukri_c11580_451         | 13.1 | 0.0 | No |
| 1B_1 | 62619345 | Kukri_c11580_818         | 13.1 | 0.0 | No |
| 1B_1 | 69774380 | Kukri_c12063_1652        | 13.1 | 0.0 | No |
| 1B_1 | 34635449 | Kukri_c13156_129         | 13.1 | 0.0 | No |
| 1B_1 | 47808466 | Kukri_c13349_176         | 13.1 | 0.0 | No |
| 1B_1 | 33713439 | Kukri_c13976_96          | 13.1 | 0.0 | No |
| 1B_1 | 34805328 | Kukri_c19641_477         | 13.1 | 0.0 | No |
| 1B_1 | 60777432 | Kukri_c21709_185         | 13.1 | 0.0 | No |
| 1B_1 | 44654366 | Kukri_c2297_181          | 13.1 | 0.0 | No |
| 1B_1 | 58613498 | Kukri_c2535_98           | 13.1 | 0.0 | No |
| 1B_1 | 23696319 | Kukri_c27690_411         | 13.1 | 0.0 | No |
| 1B_1 | 56707493 | Kukri_c28541_635         | 13.1 | 0.0 | No |
| 1B_1 | 43759446 | Kukri_c30982_1173        | 13.1 | 0.0 | No |
| 1B_1 | 48756309 | Kukri_c49091_415         | 13.1 | 0.0 | No |
| 1B_1 | 41787386 | Kukri_c5398_1061         | 13.1 | 0.0 | No |
| 1B_1 | 37771338 | Kukri_c62285_336         | 13.1 | 0.0 | No |
| 1B_1 | 62624384 | Kukri_c62848_106         | 13.1 | 0.0 | No |

|      |          |                       |      |     |    |
|------|----------|-----------------------|------|-----|----|
| 1B_1 | 15802325 | Kukri_c62848_1581     | 13.1 | 0.0 | No |
| 1B_1 | 15690350 | Kukri_c62848_1632     | 13.1 | 0.0 | No |
| 1B_1 | 52759426 | Kukri_c65759_98       | 13.1 | 0.0 | No |
| 1B_1 | 51762376 | Kukri_c7428_604       | 13.1 | 0.0 | No |
| 1B_1 | 73767352 | Kukri_c78742_146      | 13.1 | 0.0 | No |
| 1B_1 | 17695313 | Kukri_c7902_438       | 13.1 | 0.0 | No |
| 1B_1 | 41610479 | Kukri_c8308_245       | 13.1 | 0.0 | No |
| 1B_1 | 53798314 | Kukri_rep_c101550_113 | 13.1 | 0.0 | No |
| 1B_1 | 71647495 | Kukri_rep_c104432_114 | 13.1 | 0.0 | No |
| 1B_1 | 41762412 | Kukri_rep_c104432_409 | 13.1 | 0.0 | No |
| 1B_1 | 63717383 | Kukri_rep_c106406_265 | 13.1 | 0.0 | No |
| 1B_1 | 13805483 | Kukri_rep_c107366_103 | 13.1 | 0.0 | No |
| 1B_1 | 61704337 | Kukri_rep_c111517_289 | 13.1 | 0.0 | No |
| 1B_1 | 41723440 | Kukri_rep_c68583_931  | 13.1 | 0.0 | No |
| 1B_1 | 49772492 | Kukri_rep_c69383_56   | 13.1 | 0.0 | No |
| 1B_1 | 41764348 | Kukri_rep_c70738_896  | 13.1 | 0.0 | No |
| 1B_1 | 16637500 | Kukri_rep_c71291_155  | 13.1 | 0.0 | No |
| 1B_1 | 34732469 | Kukri_rep_c88171_730  | 13.1 | 0.0 | No |
| 1B_1 | 12740447 | Kukri_rep_c91496_1320 | 13.1 | 0.0 | No |
| 1B_1 | 67668327 | Kukri_rep_c95031_104  | 13.1 | 0.0 | No |
| 1B_1 | 35638360 | Ra_c1195_200          | 13.1 | 0.0 | No |
| 1B_1 | 51740351 | Ra_c33845_794         | 13.1 | 0.0 | No |
| 1B_1 | 10673413 | Ra_c4348_920          | 13.1 | 0.0 | No |
| 1B_1 | 22809436 | RAC875_c11749_97      | 13.1 | 0.0 | No |
| 1B_1 | 38687425 | RAC875_c16677_56      | 13.1 | 0.0 | No |
| 1B_1 | 71746472 | RAC875_c18282_1390    | 13.1 | 0.0 | No |
| 1B_1 | 67768392 | RAC875_c20420_87      | 13.1 | 0.0 | No |
| 1B_1 | 36724419 | RAC875_c21131_3615    | 13.1 | 0.0 | No |
| 1B_1 | 14772432 | RAC875_c21274_235     | 13.1 | 0.0 | No |
| 1B_1 | 53782388 | RAC875_c22244_61      | 13.1 | 0.0 | No |
| 1B_1 | 50715466 | RAC875_c2331_2570     | 13.1 | 0.0 | No |
| 1B_1 | 38693379 | RAC875_c24109_600     | 13.1 | 0.0 | No |
| 1B_1 | 14794374 | RAC875_c25708_503     | 13.1 | 0.0 | No |
| 1B_1 | 27725330 | RAC875_c2972_225      | 13.1 | 0.0 | No |
| 1B_1 | 11743304 | RAC875_c3457_303      | 13.1 | 0.0 | No |
| 1B_1 | 64668346 | RAC875_c3457_65       | 13.1 | 0.0 | No |
| 1B_1 | 21684355 | RAC875_c36442_127     | 13.1 | 0.0 | No |
| 1B_1 | 15612385 | RAC875_c42206_305     | 13.1 | 0.0 | No |
| 1B_1 | 50728306 | RAC875_c44575_396     | 13.1 | 0.0 | No |
| 1B_1 | 26661488 | RAC875_c44575_561     | 13.1 | 0.0 | No |
| 1B_1 | 33719451 | RAC875_c49601_837     | 13.1 | 0.0 | No |
| 1B_1 | 67726451 | RAC875_c50365_521     | 13.1 | 0.0 | No |
| 1B_1 | 44601377 | RAC875_c50514_88      | 13.1 | 0.0 | No |
| 1B_1 | 24714505 | RAC875_c5227_1385     | 13.1 | 0.0 | No |

|      |          |                         |      |     |    |
|------|----------|-------------------------|------|-----|----|
| 1B_1 | 45780403 | RAC875_c63421_83        | 13.1 | 0.0 | No |
| 1B_1 | 40802411 | RAC875_rep_c108085_570  | 13.1 | 0.0 | No |
| 1B_1 | 66608322 | RAC875_rep_c110216_250  | 13.1 | 0.0 | No |
| 1B_1 | 16636348 | RAC875_rep_c117462_124  | 13.1 | 0.0 | No |
| 1B_1 | 37779467 | RAC875_rep_c117617_183  | 13.1 | 0.0 | No |
| 1B_1 | 57613348 | RAC875_rep_c70803_1442  | 13.1 | 0.0 | No |
| 1B_1 | 10637318 | RAC875_rep_c75762_175   | 13.1 | 0.0 | No |
| 1B_1 | 31603328 | RAC875_rep_c87552_86    | 13.1 | 0.0 | No |
| 1B_1 | 18672453 | RFL_Contig1354_484      | 13.1 | 0.0 | No |
| 1B_1 | 32795404 | RFL_Contig1354_663      | 13.1 | 0.0 | No |
| 1B_1 | 55731416 | RFL_Contig2784_641      | 13.1 | 0.0 | No |
| 1B_1 | 57630348 | TA001643-0728           | 13.1 | 0.0 | No |
| 1B_1 | 47667491 | TA003659-1136           | 13.1 | 0.0 | No |
| 1B_1 | 28751364 | TA004184-0525           | 13.1 | 0.0 | No |
| 1B_1 | 56672327 | Tdurum_contig10326_151  | 13.1 | 0.0 | No |
| 1B_1 | 23691384 | Tdurum_contig11660_200  | 13.1 | 0.0 | No |
| 1B_1 | 57636308 | Tdurum_contig11692_131  | 13.1 | 0.0 | No |
| 1B_1 | 32647488 | Tdurum_contig11877_414  | 13.1 | 0.0 | No |
| 1B_1 | 45629331 | Tdurum_contig11877_429  | 13.1 | 0.0 | No |
| 1B_1 | 71630348 | Tdurum_contig11877_785  | 13.1 | 0.0 | No |
| 1B_1 | 51682447 | Tdurum_contig13391_680  | 13.1 | 0.0 | No |
| 1B_1 | 55644336 | Tdurum_contig13405_483  | 13.1 | 0.0 | No |
| 1B_1 | 34687340 | Tdurum_contig14650_689  | 13.1 | 0.0 | No |
| 1B_1 | 40614391 | Tdurum_contig19102_84   | 13.1 | 0.0 | No |
| 1B_1 | 63781466 | Tdurum_contig20752_248  | 13.1 | 0.0 | No |
| 1B_1 | 58627431 | Tdurum_contig25337_77   | 13.1 | 0.0 | No |
| 1B_1 | 15702486 | Tdurum_contig288_253    | 13.1 | 0.0 | No |
| 1B_1 | 60627481 | Tdurum_contig29712_129  | 13.1 | 0.0 | No |
| 1B_1 | 39782322 | Tdurum_contig29769_202  | 13.1 | 0.0 | No |
| 1B_1 | 69707362 | Tdurum_contig31201_201  | 13.1 | 0.0 | No |
| 1B_1 | 62806418 | Tdurum_contig31201_380  | 13.1 | 0.0 | No |
| 1B_1 | 65698324 | Tdurum_contig31624_230  | 13.1 | 0.0 | No |
| 1B_1 | 58688468 | Tdurum_contig42182_6396 | 13.1 | 0.0 | No |
| 1B_1 | 70639498 | Tdurum_contig42289_1857 | 13.1 | 0.0 | No |
| 1B_1 | 65662494 | Tdurum_contig42289_936  | 13.1 | 0.0 | No |
| 1B_1 | 66609376 | Tdurum_contig42856_1271 | 13.1 | 0.0 | No |
| 1B_1 | 22803497 | Tdurum_contig46780_203  | 13.1 | 0.0 | No |
| 1B_1 | 41762331 | Tdurum_contig47035_428  | 13.1 | 0.0 | No |
| 1B_1 | 31803334 | Tdurum_contig47456_182  | 13.1 | 0.0 | No |
| 1B_1 | 18781446 | Tdurum_contig48959_515  | 13.1 | 0.0 | No |
| 1B_1 | 60684416 | Tdurum_contig51348_327  | 13.1 | 0.0 | No |
| 1B_1 | 59773412 | Tdurum_contig53888_107  | 13.1 | 0.0 | No |
| 1B_1 | 43777427 | Tdurum_contig53888_350  | 13.1 | 0.0 | No |
| 1B_1 | 46607499 | Tdurum_contig60809_255  | 13.1 | 0.0 | No |

|      |          |                             |      |      |     |
|------|----------|-----------------------------|------|------|-----|
| 1B_1 | 48633505 | Tdurum_contig60809_268      | 13.1 | 0.0  | No  |
| 1B_1 | 37664308 | Tdurum_contig63991_186      | 13.1 | 0.0  | No  |
| 1B_1 | 43715302 | Tdurum_contig63991_280      | 13.1 | 0.0  | No  |
| 1B_1 | 21731394 | Tdurum_contig63991_404      | 13.1 | 0.0  | No  |
| 1B_1 | 70759502 | Tdurum_contig65023_587      | 13.1 | 0.0  | No  |
| 1B_1 | 39732469 | Tdurum_contig6949_697       | 13.1 | 0.0  | No  |
| 1B_1 | 40766362 | Tdurum_contig76507_442      | 13.1 | 0.0  | No  |
| 1B_1 | 24675318 | Tdurum_contig83096_345      | 13.1 | 0.0  | No  |
| 1B_1 | 54705475 | Tdurum_contig83096_388      | 13.1 | 0.0  | No  |
| 1B_1 | 39716505 | Tdurum_contig83763_107      | 13.1 | 0.0  | No  |
| 1B_1 | 44622452 | Tdurum_contig84184_124      | 13.1 | 0.0  | No  |
| 1B_1 | 28600447 | tplb0024i16_1177            | 13.1 | 0.0  | No  |
| 1B_1 | 24654501 | tplb0024i16_800             | 13.1 | 0.0  | No  |
| 1B_1 | 31665424 | tplb0030i08_367             | 13.1 | 0.0  | No  |
| 1B_1 | 72760474 | tplb0059c20_2221            | 13.1 | 0.0  | No  |
| 1B_1 | 35670496 | wsnp_be443797B_Ta_2_1       | 13.1 | 0.0  | No  |
| 1B_1 | 33691473 | wsnp_BE497109B_Ta_2_5       | 13.1 | 0.0  | No  |
| 1B_1 | 48608491 | wsnp_BG607036B_Ta_1_1       | 13.1 | 0.0  | No  |
| 1B_1 | 40621386 | wsnp_CAP11_c1043_618449     | 13.1 | 0.0  | No  |
| 1B_1 | 14804331 | wsnp_Ex_c10233_16784994     | 13.1 | 0.0  | No  |
| 1B_1 | 63673450 | wsnp_Ex_c11177_18096010     | 13.1 | 0.0  | No  |
| 1B_1 | 62790372 | wsnp_Ex_c14_27570           | 13.1 | 0.0  | No  |
| 1B_1 | 41703508 | wsnp_Ex_c1429_2744367       | 13.1 | 0.0  | No  |
| 1B_1 | 25718416 | wsnp_Ex_c15934_24341135     | 13.1 | 0.0  | No  |
| 1B_1 | 28603322 | wsnp_Ex_c30805_39678077     | 13.1 | 0.0  | No  |
| 1B_1 | 34606451 | wsnp_Ex_c38116_45719983     | 13.1 | 0.0  | No  |
| 1B_1 | 46635328 | wsnp_Ex_c6022_10552811      | 13.1 | 0.0  | No  |
| 1B_1 | 30610420 | wsnp_Ex_c9979_16421462      | 13.1 | 0.0  | No  |
| 1B_1 | 27649456 | wsnp_Ex_rep_c68573_67416138 | 13.1 | 0.0  | No  |
| 1B_1 | 35750434 | wsnp_Ex_rep_c69266_68192766 | 13.1 | 0.0  | No  |
| 1B_1 | 73766392 | wsnp_JD_c8926_9848514       | 13.1 | 0.0  | No  |
| 1B_1 | 34800337 | wsnp_Ku_c1772_3465811       | 13.1 | 0.0  | No  |
| 1B_1 | 49734344 | wsnp_Ku_c30982_40765254     | 13.1 | 0.0  | No  |
| 1B_1 | 30608335 | wsnp_Ku_c30982_40765341     | 13.1 | 0.0  | No  |
| 1B_1 | 14716471 | wsnp_Ku_c3710_6836438       | 13.1 | 0.0  | No  |
| 1B_1 | 13804371 | wsnp_Ku_c62848_63784645     | 13.1 | 0.0  | No  |
| 1B_1 | 64752461 | wsnp_Ku_c66585_65967792     | 13.1 | 0.0  | No  |
| 1B_1 | 74690481 | wsnp_RFL_Contig4726_5654774 | 13.1 | 0.0  | No  |
| 1B_1 | 61765495 | TA013374-0567               | 13.2 | 0.0  | Yes |
| 1B_1 | 58695430 | GENE-4465_342               | 13.2 | 0.0  | Yes |
| 1B_1 | 74704311 | Ku_c8767_1245               | 13.2 | 1.2  | Yes |
| 1B_1 | 19699505 | Tdurum_contig97143_402      | 14.4 | 1.3  | Yes |
| 1B_1 | 35609456 | Kukri_c51268_248            | 15.7 | 13.7 | Yes |
| 1B_1 | 30781435 | Tdurum_contig604_71         | 29.4 | 0.5  | Yes |



|      |                          |                          |      |      |     |
|------|--------------------------|--------------------------|------|------|-----|
| 1B_1 | 61640428                 | BS00009699_51            | 29.8 | 0.0  | Yes |
| 1B_1 | 74747491                 | Kukri_c33670_506         | 29.8 | 0.0  | No  |
| 1B_1 | 11773424                 | Tdurum_contig12598_378   | 29.8 | 0.0  | No  |
| 1B_1 | 30672389                 | Tdurum_contig12598_408   | 29.8 | 0.0  | No  |
| 1B_1 | 30740352                 | Tdurum_contig13608_195   | 29.8 | 0.0  | No  |
| 1B_1 | 59799504                 | Tdurum_contig42446_1915  | 29.8 | 0.0  | No  |
| 1B_1 | 74808387                 | Tdurum_contig42446_1999  | 29.8 | 1.6  | No  |
| 1B_1 | 43781489                 | BS00067012_51            | 31.4 | 0.0  | Yes |
| 1B_1 | 46678449                 | Ex_c64327_523            | 31.4 | 0.0  | No  |
| 1B_1 | 72700310                 | Excalibur_c14273_1928    | 31.4 | 0.0  | No  |
| 1B_1 | 20617445                 | IAAV468                  | 31.4 | 0.0  | No  |
| 1B_1 | 43749361                 | RAC875_c51663_87         | 31.4 | 0.0  | No  |
| 1B_1 | 22725311                 | Tdurum_contig61410_59    | 31.4 | 0.0  | No  |
| 1B_1 | 46678463                 | wsnp_BE405834B_Ta_2_2    | 31.4 | 0.0  | No  |
| 1B_1 | 71763325                 | wsnp_BE405834B_Ta_2_3    | 31.4 | 0.1  | No  |
| 1B_1 | 40644458                 | Excalibur_c34148_481     | 31.5 | 0.0  | Yes |
| 1B_1 | 18693324                 | RAC875_c41129_455        | 31.5 | 6.7  | No  |
| 1B_1 | <a href="#">wPt-9864</a> | <a href="#">wPt-9864</a> | 38.2 | 5.4  | Yes |
| 1B_1 | 40707404                 | D_contig70818_696        | 43.6 | 0.0  | Yes |
| 1B_1 | 35795483                 | Tdurum_contig41904_446   | 43.6 | 10.8 | No  |
| 1B_1 | 21697486                 | BS00030948_51            | 54.4 | 0.0  | Yes |
| 1B_1 | 68614470                 | Excalibur_c10065_570     | 54.4 | 0.0  | No  |
| 1B_1 | 12769495                 | Excalibur_c23515_1177    | 54.4 | 0.0  | No  |
| 1B_1 | 53623446                 | Excalibur_c44711_453     | 54.4 | 0.0  | No  |
| 1B_1 | 73632484                 | Jagger_c8952_170         | 54.4 | 0.0  | No  |
| 1B_1 | 72710465                 | Kukri_c2464_592          | 54.4 | 0.0  | No  |
| 1B_1 | 23614385                 | Kukri_c79135_136         | 54.4 | 1.1  | No  |
| 1B_1 | 19608410                 | TA015410-0477            | 55.5 | 5.9  | Yes |
| 1B_1 | 52674305                 | BobWhite_c28295_256      | 61.4 | 0.0  | Yes |
| 1B_1 | 45614367                 | BS00064398_51            | 61.4 | 0.0  | No  |
| 1B_1 | 45660475                 | BS00105846_51            | 61.4 | 0.0  | No  |
| 1B_1 | 67698482                 | GENE-0387_81             | 61.4 | 0.0  | No  |
| 1B_1 | 19601508                 | Kukri_c34536_259         | 61.4 | 0.0  | No  |
| 1B_1 | 46702348                 | Kukri_c8211_761          | 61.4 | 0.0  | No  |
| 1B_1 | 43727495                 | Tdurum_contig50555_1144  | 61.4 | 0.0  | No  |
| 1B_1 | 66760403                 | Tdurum_contig50555_632   | 61.4 | 0.0  | No  |
| 1B_1 | 24700328                 | Tdurum_contig58525_304   | 61.4 | 0.0  | No  |
| 1B_1 | 67701303                 | wsnp_Ex_c1493_2862065    | 61.4 | 2.8  | No  |
| 1B_1 | 61629397                 | BS00062727_51            | 64.2 | 0.1  | Yes |
| 1B_1 | 48785372                 | BS00029539_51            | 64.3 | 0.0  | Yes |
| 1B_1 | 45692333                 | BS00062726_51            | 64.3 | 0.0  | No  |
| 1B_1 | 62627346                 | BS00072113_51            | 64.3 | 0.0  | No  |
| 1B_1 | 70785458                 | Excalibur_c26496_352     | 64.3 | 0.0  | No  |
| 1B_1 | 26730461                 | Kukri_c7393_851          | 64.3 | 5.6  | No  |

|      |          |                           |      |     |     |
|------|----------|---------------------------|------|-----|-----|
| 1B_1 | tPt-5249 | tPt-5249                  | 69.9 | 2.3 | Yes |
| 1B_1 | 55795400 | BS00022323_51             | 72.1 | 0.0 | Yes |
| 1B_1 | 65690363 | BS00023004_51             | 72.1 | 0.0 | No  |
| 1B_1 | 49733364 | BS00023084_51             | 72.1 | 0.0 | No  |
| 1B_1 | 37610342 | BS00030768_51             | 72.1 | 0.0 | No  |
| 1B_1 | 59756341 | BS00074511_51             | 72.1 | 0.0 | No  |
| 1B_1 | 34662428 | BS00095286_51             | 72.1 | 0.0 | No  |
| 1B_1 | 72666366 | BS00100994_51             | 72.1 | 0.0 | No  |
| 1B_1 | 54628315 | BS00105813_51             | 72.1 | 0.0 | No  |
| 1B_1 | 59711491 | BS00108242_51             | 72.1 | 0.0 | No  |
| 1B_1 | 16740369 | Excalibur_c28255_430      | 72.1 | 0.0 | No  |
| 1B_1 | 70725311 | Excalibur_c28255_482      | 72.1 | 0.0 | No  |
| 1B_1 | 66684461 | Excalibur_c2868_1808      | 72.1 | 0.0 | No  |
| 1B_1 | 19688483 | Excalibur_c2868_486       | 72.1 | 0.0 | No  |
| 1B_1 | 45658508 | Excalibur_c43567_679      | 72.1 | 0.0 | No  |
| 1B_1 | 48806361 | Excalibur_c43567_913      | 72.1 | 0.0 | No  |
| 1B_1 | 31657337 | Excalibur_c54611_735      | 72.1 | 0.0 | No  |
| 1B_1 | 37627401 | Excalibur_rep_c105429_528 | 72.1 | 0.0 | No  |
| 1B_1 | 21682503 | Excalibur_rep_c110294_82  | 72.1 | 0.0 | No  |
| 1B_1 | 30681388 | GENE-1118_58              | 72.1 | 0.0 | No  |
| 1B_1 | 47740397 | IAAV3773                  | 72.1 | 0.0 | No  |
| 1B_1 | 51703351 | IAAV392                   | 72.1 | 0.0 | No  |
| 1B_1 | 40606456 | IAAV423                   | 72.1 | 0.0 | No  |
| 1B_1 | 31689394 | IAAV8117                  | 72.1 | 0.0 | No  |
| 1B_1 | 17609456 | Ku_c17846_363             | 72.1 | 0.0 | No  |
| 1B_1 | 53796318 | Ku_c17846_781             | 72.1 | 0.0 | No  |
| 1B_1 | 16751368 | Ku_c36151_460             | 72.1 | 0.0 | No  |
| 1B_1 | 19700315 | Kukri_c35451_437          | 72.1 | 0.0 | No  |
| 1B_1 | 14755405 | Ra_c6355_647              | 72.1 | 0.0 | No  |
| 1B_1 | 51646322 | RAC875_c11276_340         | 72.1 | 0.0 | No  |
| 1B_1 | 69719367 | RAC875_c11782_701         | 72.1 | 0.0 | No  |
| 1B_1 | 24683381 | RAC875_c1471_566          | 72.1 | 0.0 | No  |
| 1B_1 | 14654435 | RAC875_c16981_691         | 72.1 | 0.0 | No  |
| 1B_1 | 16662370 | RAC875_c3692_2287         | 72.1 | 0.0 | No  |
| 1B_1 | 58743305 | RAC875_c5016_314          | 72.1 | 0.0 | No  |
| 1B_1 | 55692455 | RAC875_c62503_372         | 72.1 | 0.0 | No  |
| 1B_1 | 22671446 | RAC875_c8222_773          | 72.1 | 0.0 | No  |
| 1B_1 | 32635476 | RAC875_c9457_457          | 72.1 | 0.0 | No  |
| 1B_1 | 60729480 | RAC875_rep_c104133_1757   | 72.1 | 0.0 | No  |
| 1B_1 | 12770435 | RAC875_rep_c74067_541     | 72.1 | 0.0 | No  |
| 1B_1 | 45796474 | TA006040-0724             | 72.1 | 0.0 | No  |
| 1B_1 | 23721435 | Tdurum_contig10767_538    | 72.1 | 0.0 | No  |
| 1B_1 | 29744445 | Tdurum_contig31941_276    | 72.1 | 0.0 | No  |
| 1B_1 | 28783422 | Tdurum_contig8791_415     | 72.1 | 0.0 | No  |

|      |          |                          |      |     |     |
|------|----------|--------------------------|------|-----|-----|
| 1B_1 | 16752342 | wsnp_Ku_c13229_21142792  | 72.1 | 0.0 | No  |
| 1B_1 | 63774326 | Ku_c28007_1398           | 72.1 | 0.1 | Yes |
| 1B_1 | 38800415 | wsnp_Ex_c2868_5293485    | 72.2 | 1.0 | Yes |
| 1B_1 | 39668402 | BobWhite_c65478_119      | 73.3 | 0.0 | Yes |
| 1B_1 | 58608431 | BS00012321_51            | 73.3 | 0.0 | No  |
| 1B_1 | 19795491 | BS00022820_51            | 73.3 | 0.0 | No  |
| 1B_1 | 53723451 | BS00026180_51            | 73.3 | 0.0 | No  |
| 1B_1 | 20746313 | BS00050522_51            | 73.3 | 0.0 | No  |
| 1B_1 | 34743454 | BS00067201_51            | 73.3 | 0.0 | No  |
| 1B_1 | 29663390 | BS00071161_51            | 73.3 | 0.0 | No  |
| 1B_1 | 39600498 | BS00071333_51            | 73.3 | 0.0 | No  |
| 1B_1 | 48687369 | BS00076192_51            | 73.3 | 0.0 | No  |
| 1B_1 | 15690446 | BS00083177_51            | 73.3 | 0.0 | No  |
| 1B_1 | 27645338 | BS00093336_51            | 73.3 | 0.0 | No  |
| 1B_1 | 39804357 | CAP11_rep_c7878_143      | 73.3 | 0.0 | No  |
| 1B_1 | 51639352 | Excalibur_c12376_569     | 73.3 | 0.0 | No  |
| 1B_1 | 54662348 | Excalibur_c29707_318     | 73.3 | 0.0 | No  |
| 1B_1 | 13609478 | Excalibur_c35316_388     | 73.3 | 0.0 | No  |
| 1B_1 | 49786457 | GENE-0014_474            | 73.3 | 0.0 | No  |
| 1B_1 | 26668498 | GENE-0412_338            | 73.3 | 0.0 | No  |
| 1B_1 | 69647494 | IACX11116                | 73.3 | 0.0 | No  |
| 1B_1 | 11810408 | Jagger_c5878_119         | 73.3 | 0.0 | No  |
| 1B_1 | 73615362 | Kukri_c26168_423         | 73.3 | 0.0 | No  |
| 1B_1 | 40618375 | Kukri_c44369_131         | 73.3 | 0.0 | No  |
| 1B_1 | 39708408 | Kukri_c54820_382         | 73.3 | 0.0 | No  |
| 1B_1 | 42600431 | Kukri_c64049_279         | 73.3 | 0.0 | No  |
| 1B_1 | 48801319 | Kukri_rep_c103804_203    | 73.3 | 0.0 | No  |
| 1B_1 | 47677332 | Kukri_rep_c68121_88      | 73.3 | 0.0 | No  |
| 1B_1 | 13737498 | RAC875_c30138_595        | 73.3 | 0.0 | No  |
| 1B_1 | 21751428 | RAC875_c400_1363         | 73.3 | 0.0 | No  |
| 1B_1 | 66710373 | RAC875_c79514_853        | 73.3 | 0.0 | No  |
| 1B_1 | 67607416 | TA002086-0901            | 73.3 | 0.0 | No  |
| 1B_1 | 14608376 | Tdurum_contig35757_161   | 73.3 | 0.0 | No  |
| 1B_1 | 51761436 | tplb0025b13_2792         | 73.3 | 0.0 | No  |
| 1B_1 | 13732472 | tplb0028p02_562          | 73.3 | 0.0 | No  |
| 1B_1 | 10683381 | wsnp_CAP12_c55_32598     | 73.3 | 0.0 | No  |
| 1B_1 | 26805440 | wsnp_JD_c5316_6447231    | 73.3 | 0.2 | No  |
| 1B_1 | 21642480 | BS00065167_51            | 73.5 | 0.0 | Yes |
| 1B_1 | 43698368 | Excalibur_rep_c111074_76 | 73.5 | 0.0 | No  |
| 1B_1 | 23725330 | IACX9264                 | 73.5 | 0.3 | No  |
| 1B_1 | wPt-0983 | wPt-0983                 | 73.8 | 0.2 | Yes |
| 1B_1 | wPt-3411 | wPt-3411                 | 74.0 | 0.3 | Yes |
| 1B_1 | wPt-1238 | wPt-1238                 | 74.2 | 0.0 | Yes |
| 1B_1 | wPt-1912 | wPt-1912                 | 74.2 | 0.1 | No  |

|      |          |                         |      |     |     |
|------|----------|-------------------------|------|-----|-----|
| 1B_1 | wPt-7138 | wPt-7138                | 74.3 | 0.0 | Yes |
| 1B_1 | tPt-1772 | tPt-1772                | 74.4 | 0.2 | Yes |
| 1B_1 | wPt-0308 | wPt-0308                | 74.6 | 1.1 | Yes |
| 1B_1 | 16672359 | BS00011824_51           | 75.7 |     | Yes |
| 1B_2 | wPt-5253 | wPt-5253                | 0.0  | 1.7 | Yes |
| 1B_2 | wPt-2968 | wPt-2968                | 1.7  | 0.2 | Yes |
| 1B_2 | wPt-9028 | wPt-9028                | 1.9  | 0.1 | Yes |
| 1B_2 | 67730310 | BobWhite_c34379_178     | 1.9  | 0.0 | Yes |
| 1B_2 | 17748418 | BobWhite_c7691_195      | 1.9  | 0.0 | No  |
| 1B_2 | 47716439 | BS00001128_51           | 1.9  | 0.0 | No  |
| 1B_2 | 37609362 | BS00021667_51           | 1.9  | 0.0 | No  |
| 1B_2 | 30627334 | BS00064948_51           | 1.9  | 0.0 | No  |
| 1B_2 | 30690327 | BS00066805_51           | 1.9  | 0.0 | No  |
| 1B_2 | 69601478 | BS00082577_51           | 1.9  | 0.0 | No  |
| 1B_2 | 35614432 | Excalibur_c39284_949    | 1.9  | 0.0 | No  |
| 1B_2 | 54765439 | Excalibur_c5888_169     | 1.9  | 0.0 | No  |
| 1B_2 | 65614327 | Excalibur_c5888_641     | 1.9  | 0.0 | No  |
| 1B_2 | 11707412 | Excalibur_c62139_215    | 1.9  | 0.0 | No  |
| 1B_2 | 43614407 | Excalibur_rep_c69522_83 | 1.9  | 0.0 | No  |
| 1B_2 | 36688437 | Ku_c11537_539           | 1.9  | 0.0 | No  |
| 1B_2 | 53756345 | Kukri_c16608_761        | 1.9  | 0.0 | No  |
| 1B_2 | 40613463 | Kukri_c29687_369        | 1.9  | 0.0 | No  |
| 1B_2 | 31742455 | Kukri_c59535_186        | 1.9  | 0.0 | No  |
| 1B_2 | 32694400 | Kukri_c59535_393        | 1.9  | 0.0 | No  |
| 1B_2 | 64653508 | Kukri_c94613_316        | 1.9  | 0.0 | No  |
| 1B_2 | 55626488 | Kukri_c94613_637        | 1.9  | 0.0 | No  |
| 1B_2 | 53711460 | Kukri_rep_c110309_69    | 1.9  | 0.0 | No  |
| 1B_2 | 27783352 | Kukri_rep_c111174_132   | 1.9  | 0.0 | No  |
| 1B_2 | 48692353 | Ra_c109187_371          | 1.9  | 0.0 | No  |
| 1B_2 | 58761410 | RAC875_c26801_129       | 1.9  | 0.0 | No  |
| 1B_2 | 10606387 | RAC875_c5882_307        | 1.9  | 0.0 | No  |
| 1B_2 | 18791488 | RAC875_rep_c109804_216  | 1.9  | 0.0 | No  |
| 1B_2 | 59747453 | RFL_Contig2550_679      | 1.9  | 0.0 | No  |
| 1B_2 | 61686422 | Tdurum_contig13879_352  | 1.9  | 0.0 | No  |
| 1B_2 | 46642426 | Tdurum_contig13879_429  | 1.9  | 0.0 | No  |
| 1B_2 | 14637444 | Tdurum_contig13879_520  | 1.9  | 0.0 | No  |
| 1B_2 | 29694378 | Tdurum_contig13879_919  | 1.9  | 0.0 | No  |
| 1B_2 | 44787503 | Tdurum_contig1631_240   | 1.9  | 0.0 | No  |
| 1B_2 | 19800401 | Tdurum_contig29915_167  | 1.9  | 0.0 | No  |
| 1B_2 | 29757478 | Tdurum_contig42108_958  | 1.9  | 0.0 | No  |
| 1B_2 | 12640317 | Tdurum_contig42960_865  | 1.9  | 0.0 | No  |
| 1B_2 | 38786352 | Tdurum_contig49509_456  | 1.9  | 0.0 | No  |
| 1B_2 | 16635458 | Tdurum_contig51922_676  | 1.9  | 0.0 | No  |
| 1B_2 | 68676381 | Tdurum_contig58710_411  | 1.9  | 0.0 | No  |

|      |                          |                             |      |     |     |
|------|--------------------------|-----------------------------|------|-----|-----|
| 1B_2 | 52810302                 | Tdurum_contig58710_516      | 1.9  | 0.0 | No  |
| 1B_2 | 32631382                 | Tdurum_contig60566_269      | 1.9  | 0.0 | No  |
| 1B_2 | 53697357                 | Tdurum_contig80264_1014     | 1.9  | 0.0 | No  |
| 1B_2 | 72725302                 | Tdurum_contig9144_222       | 1.9  | 0.0 | No  |
| 1B_2 | 70602492                 | Tdurum_contig92835_177      | 1.9  | 0.0 | No  |
| 1B_2 | 35760374                 | wsnp_BE446672B_Ta_2_1       | 1.9  | 0.0 | No  |
| 1B_2 | 26780455                 | wsnp_BG274687B_Ta_2_1       | 1.9  | 0.0 | No  |
| 1B_2 | 42770510                 | wsnp_Ex_c750_1474184        | 1.9  | 0.0 | No  |
| 1B_2 | 50622429                 | wsnp_Ex_c955_1827567        | 1.9  | 0.0 | No  |
| 1B_2 | 50709395                 | wsnp_Ku_c11807_19204597     | 1.9  | 1.6 | No  |
| 1B_2 | 26714508                 | D_contig03023_692           | 3.5  | 4.6 | Yes |
| 1B_2 | <a href="#">wPt-1786</a> | <a href="#">wPt-1786</a>    | 8.1  | 0.0 | Yes |
| 1B_2 | <a href="#">tPt-6091</a> | <a href="#">tPt-6091</a>    | 8.2  | 0.0 | Yes |
| 1B_2 | 55628463                 | Kukri_c15691_151            | 8.2  | 0.0 | Yes |
| 1B_2 | <a href="#">wPt-1672</a> | <a href="#">wPt-1672</a>    | 8.2  | 0.0 | Yes |
| 1B_2 | 60701386                 | BobWhite_c12960_168         | 8.2  | 0.0 | Yes |
| 1B_2 | 57601344                 | BobWhite_c32659_88          | 8.2  | 0.0 | No  |
| 1B_2 | 31611357                 | BobWhite_c34125_183         | 8.2  | 0.0 | No  |
| 1B_2 | 67733477                 | BS00024107_51               | 8.2  | 0.0 | No  |
| 1B_2 | 52805480                 | BS00033776_51               | 8.2  | 0.0 | No  |
| 1B_2 | 50689369                 | BS00063302_51               | 8.2  | 0.0 | No  |
| 1B_2 | 33644429                 | BS00093275_51               | 8.2  | 0.0 | No  |
| 1B_2 | 48756379                 | CAP11_c7969_315             | 8.2  | 0.0 | No  |
| 1B_2 | 74791354                 | Excalibur_c38500_494        | 8.2  | 0.0 | No  |
| 1B_2 | 34727411                 | IAAV8347                    | 8.2  | 0.0 | No  |
| 1B_2 | 11686500                 | Kukri_c18749_968            | 8.2  | 0.0 | No  |
| 1B_2 | 17613419                 | Kukri_c32122_257            | 8.2  | 0.0 | No  |
| 1B_2 | 59663404                 | Tdurum_contig43162_244      | 8.2  | 0.0 | No  |
| 1B_2 | 32615328                 | Tdurum_contig52086_108      | 8.2  | 0.0 | No  |
| 1B_2 | 64793360                 | Tdurum_contig52086_129      | 8.2  | 0.0 | No  |
| 1B_2 | 22808326                 | Tdurum_contig52086_264      | 8.2  | 0.0 | No  |
| 1B_2 | 45763334                 | Tdurum_contig52086_488      | 8.2  | 0.0 | No  |
| 1B_2 | 10794409                 | Tdurum_contig52086_524      | 8.2  | 0.0 | No  |
| 1B_2 | 65770440                 | tplb0049h18_765             | 8.2  | 0.0 | No  |
| 1B_2 | 64776382                 | wsnp_Ex_rep_c88749_79992654 | 8.2  | 0.0 | No  |
| 1B_2 | 44800381                 | Tdurum_contig52086_342      | 8.2  | 1.7 | Yes |
| 1B_2 | <a href="#">wPt-1973</a> | <a href="#">wPt-1973</a>    | 9.9  | 3.6 | Yes |
| 1B_2 | 49616444                 | D_GBUVHFX01AHO3C_336        | 13.5 | 1.5 | Yes |
| 1B_2 | 23720402                 | BobWhite_c16824_151         | 15.0 | 0.0 | Yes |
| 1B_2 | 49658452                 | BobWhite_rep_c50057_164     | 15.0 | 0.0 | No  |
| 1B_2 | 63612335                 | BobWhite_s64871_104         | 15.0 | 0.0 | No  |
| 1B_2 | 65635338                 | BS00000010_51               | 15.0 | 0.0 | No  |
| 1B_2 | 16721309                 | BS00023105_51               | 15.0 | 0.0 | No  |
| 1B_2 | 43715450                 | BS00036439_51               | 15.0 | 0.0 | No  |

|      |                          |                          |      |      |     |
|------|--------------------------|--------------------------|------|------|-----|
| 1B_2 | 71651430                 | BS00060686_51            | 15.0 | 0.0  | No  |
| 1B_2 | 55695435                 | BS00065694_51            | 15.0 | 0.0  | No  |
| 1B_2 | 26796350                 | BS00066052_51            | 15.0 | 0.0  | No  |
| 1B_2 | 13765498                 | BS00073763_51            | 15.0 | 0.0  | No  |
| 1B_2 | 39652412                 | BS00084990_51            | 15.0 | 0.0  | No  |
| 1B_2 | 46774335                 | BS00089959_51            | 15.0 | 0.0  | No  |
| 1B_2 | 54719454                 | BS00103710_51            | 15.0 | 0.0  | No  |
| 1B_2 | 56737405                 | BS00107837_51            | 15.0 | 0.0  | No  |
| 1B_2 | 22704372                 | CAP7_c1788_66            | 15.0 | 0.0  | No  |
| 1B_2 | 34785408                 | D_GCE8AKX01BOGN5_399     | 15.0 | 0.0  | No  |
| 1B_2 | 31609371                 | Excalibur_c11190_617     | 15.0 | 0.0  | No  |
| 1B_2 | 41667355                 | IAAV5776                 | 15.0 | 0.0  | No  |
| 1B_2 | 23617489                 | IAAV6011                 | 15.0 | 0.0  | No  |
| 1B_2 | 17704359                 | IACX17310                | 15.0 | 0.0  | No  |
| 1B_2 | 23657367                 | Kukri_c15757_1117        | 15.0 | 0.0  | No  |
| 1B_2 | 15653484                 | Kukri_c376_3063          | 15.0 | 0.0  | No  |
| 1B_2 | 39765425                 | Kukri_c44604_203         | 15.0 | 0.0  | No  |
| 1B_2 | 53658438                 | Kukri_c5873_645          | 15.0 | 0.0  | No  |
| 1B_2 | 23763311                 | RAC875_rep_c118984_119   | 15.0 | 0.0  | No  |
| 1B_2 | 31772468                 | TA002645-0060            | 15.0 | 0.0  | No  |
| 1B_2 | 50618434                 | Tdurum_contig42558_134   | 15.0 | 0.0  | No  |
| 1B_2 | 14658478                 | Tdurum_contig46647_623   | 15.0 | 0.0  | No  |
| 1B_2 | 41671394                 | Tdurum_contig62905_165   | 15.0 | 0.0  | No  |
| 1B_2 | 28774445                 | Tdurum_contig62905_530   | 15.0 | 0.0  | No  |
| 1B_2 | 47791346                 | Tdurum_contig84791_198   | 15.0 | 0.0  | No  |
| 1B_2 | 51690496                 | Tdurum_contig8669_131    | 15.0 | 0.0  | No  |
| 1B_2 | 29639357                 | Tdurum_contig8669_296    | 15.0 | 0.1  | No  |
| 1B_2 | 40796301                 | Ku_c26_547               | 15.0 | 0.0  | Yes |
| 1B_2 | <a href="#">wPt-1770</a> | <a href="#">wPt-1770</a> | 15.0 | 0.0  | Yes |
| 1B_2 | <a href="#">wPt-1313</a> | <a href="#">wPt-1313</a> | 15.0 | 0.1  | No  |
| 1B_2 | 69727475                 | IAAV1913                 | 15.1 | 11.0 | Yes |
| 1B_2 | <a href="#">wPt-4651</a> | <a href="#">wPt-4651</a> | 26.1 |      | Yes |
| 1B_3 | 70640446                 | Excalibur_c8585_561      | 0.0  | 0.0  | Yes |
| 1B_3 | 23674376                 | BobWhite_c23617_167      | 0.0  | 0.0  | Yes |
| 1B_3 | 48645474                 | BS00002484_51            | 0.0  | 0.0  | No  |
| 1B_3 | 56607317                 | BS00021934_51            | 0.0  | 0.0  | No  |
| 1B_3 | 66754322                 | BS00064944_51            | 0.0  | 0.0  | No  |
| 1B_3 | 28640326                 | BS00065396_51            | 0.0  | 0.0  | No  |
| 1B_3 | 43804486                 | BS00070285_51            | 0.0  | 0.0  | No  |
| 1B_3 | 57727446                 | BS00099794_51            | 0.0  | 0.0  | No  |
| 1B_3 | 23777360                 | BS00109244_51            | 0.0  | 0.0  | No  |
| 1B_3 | 36670439                 | CAP7_c199_62             | 0.0  | 0.0  | No  |
| 1B_3 | 46689426                 | Excalibur_c8585_701      | 0.0  | 0.0  | No  |
| 1B_3 | 16732399                 | Jagger_c3757_131         | 0.0  | 0.0  | No  |

|      |          |                              |     |     |     |
|------|----------|------------------------------|-----|-----|-----|
| 1B_3 | 64797339 | Kukri_c57725_146             | 0.0 | 0.0 | No  |
| 1B_3 | 19693332 | RFL_Contig1823_1044          | 0.0 | 0.0 | No  |
| 1B_3 | 52624477 | Tdurum_contig11216_942       | 0.0 | 0.0 | No  |
| 1B_3 | 63643414 | Tdurum_contig30664_181       | 0.0 | 0.0 | No  |
| 1B_3 | 49762312 | Tdurum_contig50988_500       | 0.0 | 0.0 | No  |
| 1B_3 | 42741502 | wsnp_CAP11_c1902_1022590     | 0.0 | 0.0 | No  |
| 1B_3 | 23746385 | wsnp_RFL_Contig3951_4390396  | 0.0 | 3.0 | No  |
| 1B_3 | 24699324 | BS00064943_51                | 3.0 |     | Yes |
| 2A_1 | 32788463 | wsnp_CAP11_rep_c6137_2841945 | 0.0 | 0.0 | Yes |
| 2A_1 | 72774394 | Kukri_rep_c82871_113         | 0.0 | 0.0 | Yes |
| 2A_1 | 13780481 | BS00060653_51                | 0.0 | 0.0 | Yes |
| 2A_1 | 11795376 | BobWhite_c14425_216          | 0.0 | 0.0 | Yes |
| 2A_1 | 63616314 | BobWhite_c44175_495          | 0.0 | 0.0 | No  |
| 2A_1 | 35777422 | BobWhite_c9626_246           | 0.0 | 0.0 | No  |
| 2A_1 | 40680495 | BS00010932_51                | 0.0 | 0.0 | No  |
| 2A_1 | 65677326 | BS00011045_51                | 0.0 | 0.0 | No  |
| 2A_1 | 12770428 | BS00023953_51                | 0.0 | 0.0 | No  |
| 2A_1 | 51626408 | BS00031140_51                | 0.0 | 0.0 | No  |
| 2A_1 | 50641417 | BS00032606_51                | 0.0 | 0.0 | No  |
| 2A_1 | 10774365 | BS00034382_51                | 0.0 | 0.0 | No  |
| 2A_1 | 26738343 | BS00039489_51                | 0.0 | 0.0 | No  |
| 2A_1 | 20603489 | BS00039797_51                | 0.0 | 0.0 | No  |
| 2A_1 | 59798497 | BS00063298_51                | 0.0 | 0.0 | No  |
| 2A_1 | 17628307 | BS00063599_51                | 0.0 | 0.0 | No  |
| 2A_1 | 43687428 | BS00066748_51                | 0.0 | 0.0 | No  |
| 2A_1 | 48792412 | BS00073720_51                | 0.0 | 0.0 | No  |
| 2A_1 | 16768510 | BS00077693_51                | 0.0 | 0.0 | No  |
| 2A_1 | 36809438 | BS00078923_51                | 0.0 | 0.0 | No  |
| 2A_1 | 11618300 | BS00080997_51                | 0.0 | 0.0 | No  |
| 2A_1 | 72601336 | BS00097263_51                | 0.0 | 0.0 | No  |
| 2A_1 | 20664453 | BS00100472_51                | 0.0 | 0.0 | No  |
| 2A_1 | 70725319 | CAP11_c1716_97               | 0.0 | 0.0 | No  |
| 2A_1 | 17635499 | CAP11_s9154_121              | 0.0 | 0.0 | No  |
| 2A_1 | 71645325 | CAP7_rep_c6939_197           | 0.0 | 0.0 | No  |
| 2A_1 | 53736311 | Ex_c12563_1279               | 0.0 | 0.0 | No  |
| 2A_1 | 28706423 | Ex_c39005_750                | 0.0 | 0.0 | No  |
| 2A_1 | 18783410 | Ex_c5366_1904                | 0.0 | 0.0 | No  |
| 2A_1 | 10757395 | Excalibur_c56144_207         | 0.0 | 0.0 | No  |
| 2A_1 | 11641466 | Excalibur_c640_464           | 0.0 | 0.0 | No  |
| 2A_1 | 66784474 | Excalibur_c7154_886          | 0.0 | 0.0 | No  |
| 2A_1 | 73717436 | Excalibur_rep_c67434_73      | 0.0 | 0.0 | No  |
| 2A_1 | 53747371 | GENE-0940_83                 | 0.0 | 0.0 | No  |
| 2A_1 | 19602348 | GENE-0976_223                | 0.0 | 0.0 | No  |
| 2A_1 | 56718420 | GENE-1326_350                | 0.0 | 0.0 | No  |

|      |          |                              |     |     |    |
|------|----------|------------------------------|-----|-----|----|
| 2A_1 | 73635377 | IAAV1587                     | 0.0 | 0.0 | No |
| 2A_1 | 44609415 | IAAV3570                     | 0.0 | 0.0 | No |
| 2A_1 | 43614332 | IAAV359                      | 0.0 | 0.0 | No |
| 2A_1 | 41618338 | IAAV444                      | 0.0 | 0.0 | No |
| 2A_1 | 17710460 | IAAV6661                     | 0.0 | 0.0 | No |
| 2A_1 | 53743369 | IAAV7492                     | 0.0 | 0.0 | No |
| 2A_1 | 18621351 | IAAV9024                     | 0.0 | 0.0 | No |
| 2A_1 | 57610416 | IAAV9197                     | 0.0 | 0.0 | No |
| 2A_1 | 22798487 | JD_c14920_380                | 0.0 | 0.0 | No |
| 2A_1 | 71689489 | JD_c3358_1128                | 0.0 | 0.0 | No |
| 2A_1 | 44648444 | Ku_c13599_707                | 0.0 | 0.0 | No |
| 2A_1 | 16713405 | Ku_c27939_333                | 0.0 | 0.0 | No |
| 2A_1 | 12758474 | Ku_c6019_806                 | 0.0 | 0.0 | No |
| 2A_1 | 66677301 | Kukri_c11705_767             | 0.0 | 0.0 | No |
| 2A_1 | 37740358 | Kukri_c12194_1322            | 0.0 | 0.0 | No |
| 2A_1 | 19732433 | Kukri_c15325_1360            | 0.0 | 0.0 | No |
| 2A_1 | 25713446 | Kukri_c20280_325             | 0.0 | 0.0 | No |
| 2A_1 | 45725474 | Kukri_c34097_494             | 0.0 | 0.0 | No |
| 2A_1 | 69619397 | Kukri_c38852_100             | 0.0 | 0.0 | No |
| 2A_1 | 74619450 | Kukri_c4213_2363             | 0.0 | 0.0 | No |
| 2A_1 | 50756413 | Kukri_c4213_2733             | 0.0 | 0.0 | No |
| 2A_1 | 69737327 | Kukri_c42406_313             | 0.0 | 0.0 | No |
| 2A_1 | 64635446 | Kukri_c5358_1252             | 0.0 | 0.0 | No |
| 2A_1 | 35774386 | Kukri_c93735_119             | 0.0 | 0.0 | No |
| 2A_1 | 12714313 | Kukri_rep_c102166_1016       | 0.0 | 0.0 | No |
| 2A_1 | 44754314 | Kukri_rep_c105807_101        | 0.0 | 0.0 | No |
| 2A_1 | 59622339 | Ra_c11553_1115               | 0.0 | 0.0 | No |
| 2A_1 | 29645429 | Ra_c15292_990                | 0.0 | 0.0 | No |
| 2A_1 | 17713475 | RAC875_c2054_191             | 0.0 | 0.0 | No |
| 2A_1 | 11640383 | RAC875_c4267_1269            | 0.0 | 0.0 | No |
| 2A_1 | 70656394 | RAC875_rep_c101788_71        | 0.0 | 0.0 | No |
| 2A_1 | 22627442 | TA001220-1276                | 0.0 | 0.0 | No |
| 2A_1 | 43720339 | TA001801-0524                | 0.0 | 0.0 | No |
| 2A_1 | 43717452 | Tdurum_contig10356_818       | 0.0 | 0.0 | No |
| 2A_1 | 55702363 | Tdurum_contig10385_477       | 0.0 | 0.0 | No |
| 2A_1 | 62678484 | Tdurum_contig10910_1662      | 0.0 | 0.0 | No |
| 2A_1 | 22690457 | Tdurum_contig12179_239       | 0.0 | 0.0 | No |
| 2A_1 | 23604360 | Tdurum_contig12179_270       | 0.0 | 0.0 | No |
| 2A_1 | 13765369 | Tdurum_contig12179_75        | 0.0 | 0.0 | No |
| 2A_1 | 60620428 | Tdurum_contig27794_724       | 0.0 | 0.0 | No |
| 2A_1 | 61731416 | wsnp_BE399936A_Ta_2_1        | 0.0 | 0.0 | No |
| 2A_1 | 47646508 | wsnp_BG263263A_Ta_2_1        | 0.0 | 0.0 | No |
| 2A_1 | 10802434 | wsnp_CAP11_rep_c8681_3747503 | 0.0 | 0.0 | No |
| 2A_1 | 24781464 | wsnp_Ex_c1064_2034518        | 0.0 | 0.0 | No |



|      |                          |                             |      |      |     |
|------|--------------------------|-----------------------------|------|------|-----|
| 2A_1 | 46748420                 | wsnp_Ex_c14760_22866930     | 0.0  | 0.0  | No  |
| 2A_1 | 24683485                 | wsnp_Ex_c21786_30948397     | 0.0  | 0.0  | No  |
| 2A_1 | 66682426                 | wsnp_Ex_c23720_32957892     | 0.0  | 0.0  | No  |
| 2A_1 | 26601383                 | wsnp_Ex_c25057_34318425     | 0.0  | 0.0  | No  |
| 2A_1 | 62772418                 | wsnp_Ex_c45617_51361414     | 0.0  | 0.0  | No  |
| 2A_1 | 65761377                 | wsnp_Ku_c30418_40245121     | 0.0  | 0.0  | No  |
| 2A_1 | 16661422                 | wsnp_Ku_c38662_47257696     | 0.0  | 0.0  | No  |
| 2A_1 | 36790393                 | wsnp_Ku_c4213_7674814       | 0.0  | 0.0  | No  |
| 2A_1 | 63794395                 | wsnp_Ra_c10861_17763060     | 0.0  | 0.0  | No  |
| 2A_1 | 65641490                 | wsnp_Ra_c18391_27447178     | 0.0  | 0.0  | No  |
| 2A_1 | 19652399                 | wsnp_Ra_c58188_60005934     | 0.0  | 0.0  | No  |
| 2A_1 | 37734304                 | wsnp_Ra_rep_c88200_80168527 | 0.0  | 1.0  | No  |
| 2A_1 | 17682328                 | Excalibur_c6027_1035        | 1.0  | 0.0  | Yes |
| 2A_1 | 70794460                 | Kukri_c7169_105             | 1.0  | 0.0  | No  |
| 2A_1 | 27755336                 | RAC875_rep_c89170_572       | 1.0  | 0.0  | No  |
| 2A_1 | 19747476                 | Tdurum_contig10696_458      | 1.0  | 0.0  | No  |
| 2A_1 | 50644461                 | Tdurum_contig31600_293      | 1.0  | 0.0  | No  |
| 2A_1 | 26684306                 | Tdurum_contig33419_124      | 1.0  | 0.0  | No  |
| 2A_1 | 58689345                 | Tdurum_contig33419_337      | 1.0  | 0.0  | No  |
| 2A_1 | 52737459                 | Tdurum_contig42331_2843     | 1.0  | 0.0  | No  |
| 2A_1 | 39633361                 | Tdurum_contig47103_94       | 1.0  | 0.0  | No  |
| 2A_1 | 25749442                 | Tdurum_contig55145_180      | 1.0  | 0.0  | No  |
| 2A_1 | 21685361                 | Tdurum_contig93152_81       | 1.0  | 4.0  | No  |
| 2A_1 | 52760352                 | BS00028481_51               | 5.0  | 0.0  | Yes |
| 2A_1 | 12736508                 | BS00036985_51               | 5.0  | 0.0  | No  |
| 2A_1 | 23754450                 | BS00038871_51               | 5.0  | 0.0  | No  |
| 2A_1 | 60728306                 | BS00055512_51               | 5.0  | 0.0  | No  |
| 2A_1 | 32770361                 | BS00055514_51               | 5.0  | 0.0  | No  |
| 2A_1 | 57703424                 | BS00062756_51               | 5.0  | 0.0  | No  |
| 2A_1 | 25650449                 | BS00062757_51               | 5.0  | 0.0  | No  |
| 2A_1 | 66723439                 | D_contig58311_469           | 5.0  | 0.0  | No  |
| 2A_1 | 27700322                 | Excalibur_rep_c103924_189   | 5.0  | 0.0  | No  |
| 2A_1 | 50684497                 | Kukri_c58791_906            | 5.0  | 0.0  | No  |
| 2A_1 | 31758429                 | RAC875_c39665_175           | 5.0  | 0.0  | No  |
| 2A_1 | 60799359                 | Tdurum_contig31316_197      | 5.0  | 9.3  | No  |
| 2A_1 | 40785477                 | Tdurum_contig5114_319       | 14.3 | 16.1 | Yes |
| 2A_1 | <a href="#">wPt-7466</a> | <a href="#">wPt-7466</a>    | 30.4 |      | Yes |
| 2A_2 | 12687490                 | RAC875_c56095_66            | 0.0  | 3.9  | Yes |
| 2A_2 | <a href="#">tPt-6105</a> | <a href="#">tPt-6105</a>    | 3.9  | 1.6  | Yes |
| 2A_2 | 62801364                 | BS00028935_51               | 5.5  | 0.0  | Yes |
| 2A_2 | 45757373                 | BS00054751_51               | 5.5  | 0.0  | No  |
| 2A_2 | 64623336                 | Excalibur_c28710_490        | 5.5  | 0.0  | No  |
| 2A_2 | 20628323                 | Ku_c68139_836               | 5.5  | 0.0  | No  |
| 2A_2 | 14732324                 | RAC875_c104604_86           | 5.5  | 0.0  | No  |

|      |          |                             |      |     |     |
|------|----------|-----------------------------|------|-----|-----|
| 2A_2 | 72781355 | RAC875_c48891_476           | 5.5  | 0.0 | No  |
| 2A_2 | 26770422 | Tdurum_contig67879_504      | 5.5  | 0.7 | No  |
| 2A_2 | 72802312 | GENE-0361_558               | 6.2  | 0.4 | Yes |
| 2A_2 | 53608491 | BS00101944_51               | 6.6  | 0.0 | Yes |
| 2A_2 | 29796437 | BobWhite_c1477_315          | 6.6  | 0.0 | Yes |
| 2A_2 | 33650474 | BobWhite_c18406_110         | 6.6  | 0.0 | No  |
| 2A_2 | 64601402 | BobWhite_c5756_163          | 6.6  | 0.0 | No  |
| 2A_2 | 70630336 | BS00011599_51               | 6.6  | 0.0 | No  |
| 2A_2 | 65798322 | BS00022287_51               | 6.6  | 0.0 | No  |
| 2A_2 | 66659360 | BS00094172_51               | 6.6  | 0.0 | No  |
| 2A_2 | 28630489 | BS00095525_51               | 6.6  | 0.0 | No  |
| 2A_2 | 44725499 | D_GA8KES401D9BT5_335        | 6.6  | 0.0 | No  |
| 2A_2 | 74680431 | Excalibur_c1999_1178        | 6.6  | 0.0 | No  |
| 2A_2 | 69798300 | Excalibur_c28710_103        | 6.6  | 0.0 | No  |
| 2A_2 | 49653447 | Excalibur_c97347_55         | 6.6  | 0.0 | No  |
| 2A_2 | 41757346 | GENE-0361_416               | 6.6  | 0.0 | No  |
| 2A_2 | 15740306 | GENE-0361_486               | 6.6  | 0.0 | No  |
| 2A_2 | 69796312 | IAAV2607                    | 6.6  | 0.0 | No  |
| 2A_2 | 52809353 | IAAV2847                    | 6.6  | 0.0 | No  |
| 2A_2 | 34767440 | IAAV5548                    | 6.6  | 0.0 | No  |
| 2A_2 | 59804418 | Kukri_rep_c110277_268       | 6.6  | 0.0 | No  |
| 2A_2 | 10754360 | Ra_c72517_981               | 6.6  | 0.0 | No  |
| 2A_2 | 42668479 | RAC875_c21405_591           | 6.6  | 0.0 | No  |
| 2A_2 | 67743442 | RAC875_c2538_206            | 6.6  | 0.0 | No  |
| 2A_2 | 58740323 | RAC875_c35873_1828          | 6.6  | 0.0 | No  |
| 2A_2 | 55740323 | RAC875_c35873_1894          | 6.6  | 0.0 | No  |
| 2A_2 | 54752374 | RAC875_c43810_265           | 6.6  | 0.0 | No  |
| 2A_2 | 35747369 | RAC875_c63917_698           | 6.6  | 0.0 | No  |
| 2A_2 | 68788418 | RAC875_c68649_457           | 6.6  | 0.0 | No  |
| 2A_2 | 72653433 | RAC875_rep_c69643_488       | 6.6  | 0.0 | No  |
| 2A_2 | 28795373 | RAC875_rep_c72517_1215      | 6.6  | 0.0 | No  |
| 2A_2 | 42757341 | Tdurum_contig10209_925      | 6.6  | 0.0 | No  |
| 2A_2 | 41657335 | Tdurum_contig60619_283      | 6.6  | 0.0 | No  |
| 2A_2 | 17627350 | wsnp_Ex_rep_c66356_64538896 | 6.6  | 0.0 | No  |
| 2A_2 | 64645504 | wsnp_Ex_rep_c70934_69795145 | 6.6  | 0.0 | No  |
| 2A_2 | 28712441 | wsnp_JD_c30_49876           | 6.6  | 0.1 | No  |
| 2A_2 | 30735370 | BS00067603_51               | 6.8  | 5.8 | Yes |
| 2A_2 | 31617487 | BS00022467_51               | 12.6 | 0.0 | Yes |
| 2A_2 | 64698409 | BS00069105_51               | 12.6 | 0.0 | No  |
| 2A_2 | 67657411 | BS00082153_51               | 12.6 | 0.0 | No  |
| 2A_2 | 45773506 | Excalibur_c33560_256        | 12.6 | 0.0 | No  |
| 2A_2 | 30741404 | Kukri_c408_154              | 12.6 | 0.0 | No  |
| 2A_2 | 30642485 | tplb0060e06_691             | 12.6 | 1.5 | No  |
| 2A_2 | 44697487 | BS00009594_51               | 14.1 | 0.0 | Yes |

|      |          |                         |      |     |     |
|------|----------|-------------------------|------|-----|-----|
| 2A_2 | 46701396 | BS00012942_51           | 14.1 | 0.0 | No  |
| 2A_2 | 16719330 | IAAV7742                | 14.1 | 0.0 | No  |
| 2A_2 | 31645439 | JD_c10324_88            | 14.1 | 0.0 | No  |
| 2A_2 | 32697331 | Ku_c68144_387           | 14.1 | 0.0 | No  |
| 2A_2 | 26688469 | Ku_c68144_972           | 14.1 | 0.0 | No  |
| 2A_2 | 15673367 | Ra_c1757_256            | 14.1 | 0.0 | No  |
| 2A_2 | 52795409 | RAC875_c1757_1183       | 14.1 | 0.0 | No  |
| 2A_2 | 48799356 | RAC875_c29056_261       | 14.1 | 0.0 | No  |
| 2A_2 | 72710375 | RAC875_c29056_299       | 14.1 | 0.0 | No  |
| 2A_2 | 56734412 | RAC875_c35807_1110      | 14.1 | 0.0 | No  |
| 2A_2 | 29766494 | Tdurum_contig42937_1564 | 14.1 | 0.0 | No  |
| 2A_2 | 42713505 | Tdurum_contig45196_487  | 14.1 | 1.5 | No  |
| 2A_2 | 40631417 | BS00032383_51           | 15.6 | 0.0 | Yes |
| 2A_2 | 69665444 | D_GBUVHFX02GKWUA_343    | 15.6 | 0.0 | No  |
| 2A_2 | 25742471 | Tdurum_contig92425_1324 | 15.6 | 0.0 | No  |
| 2A_2 | 39777486 | Tdurum_contig92425_801  | 15.6 | 0.0 | No  |
| 2A_2 | 60607474 | Tdurum_contig92425_992  | 15.6 | 0.7 | No  |
| 2A_2 | 18691337 | Tdurum_contig92425_1612 | 16.4 | 0.0 | Yes |
| 2A_2 | 54630357 | Tdurum_contig92425_296  | 16.4 | 0.0 | No  |
| 2A_2 | 53753419 | Tdurum_contig92425_908  | 16.4 | 0.5 | No  |
| 2A_2 | 56790507 | Tdurum_contig92425_1126 | 16.8 | 0.0 | Yes |
| 2A_2 | 74760413 | Tdurum_contig92425_224  | 16.8 | 0.0 | No  |
| 2A_2 | 27633451 | Tdurum_contig92425_431  | 16.8 | 1.4 | No  |
| 2A_2 | 40647320 | BS00021937_51           | 18.2 | 0.0 | Yes |
| 2A_2 | 41800396 | GENE-0918_140           | 18.2 | 0.0 | No  |
| 2A_2 | 35780334 | Kukri_c16094_289        | 18.2 | 0.0 | No  |
| 2A_2 | 48681408 | Kukri_c16094_799        | 18.2 | 0.0 | No  |
| 2A_2 | 54664437 | Kukri_c36985_104        | 18.2 | 0.0 | No  |
| 2A_2 | 22760483 | Kukri_rep_c104451_213   | 18.2 | 0.0 | No  |
| 2A_2 | 32677374 | RAC875_c22214_142       | 18.2 | 0.0 | No  |
| 2A_2 | 26638455 | Tdurum_contig50839_279  | 18.2 | 0.0 | No  |
| 2A_2 | 34742374 | Tdurum_contig50839_593  | 18.2 | 0.0 | No  |
| 2A_2 | 29738401 | Tdurum_contig62210_229  | 18.2 | 0.0 | No  |
| 2A_2 | 15627422 | Tdurum_contig64286_182  | 18.2 | 0.0 | No  |
| 2A_2 | 74663355 | Tdurum_contig64286_268  | 18.2 | 0.1 | No  |
| 2A_2 | 35751318 | BS00007689_51           | 18.3 | 1.3 | Yes |
| 2A_2 | 30669333 | BobWhite_c7551_418      | 19.6 | 0.0 | Yes |
| 2A_2 | 53682421 | BobWhite_rep_c64068_213 | 19.6 | 0.0 | No  |
| 2A_2 | 15710333 | BS00000479_51           | 19.6 | 0.0 | No  |
| 2A_2 | 44713412 | BS00010760_51           | 19.6 | 0.0 | No  |
| 2A_2 | 19714437 | BS00011539_51           | 19.6 | 0.0 | No  |
| 2A_2 | 24772471 | BS00062869_51           | 19.6 | 0.0 | No  |
| 2A_2 | 68776415 | BS00077504_51           | 19.6 | 0.0 | No  |
| 2A_2 | 49659454 | BS00087929_51           | 19.6 | 0.0 | No  |

|      |          |                          |      |     |    |
|------|----------|--------------------------|------|-----|----|
| 2A_2 | 69671477 | BS00087932_51            | 19.6 | 0.0 | No |
| 2A_2 | 66721324 | BS00097473_51            | 19.6 | 0.0 | No |
| 2A_2 | 52731374 | BS00098033_51            | 19.6 | 0.0 | No |
| 2A_2 | 32642357 | CAP12_c1380_238          | 19.6 | 0.0 | No |
| 2A_2 | 14601325 | Ex_c36309_435            | 19.6 | 0.0 | No |
| 2A_2 | 23685338 | Excalibur_c17000_557     | 19.6 | 0.0 | No |
| 2A_2 | 38672488 | Excalibur_c20478_641     | 19.6 | 0.0 | No |
| 2A_2 | 71740479 | Excalibur_c27142_67      | 19.6 | 0.0 | No |
| 2A_2 | 54711340 | Excalibur_c30571_95      | 19.6 | 0.0 | No |
| 2A_2 | 50621322 | Excalibur_c4372_262      | 19.6 | 0.0 | No |
| 2A_2 | 42728332 | Excalibur_c62106_387     | 19.6 | 0.0 | No |
| 2A_2 | 64655304 | Excalibur_c63622_125     | 19.6 | 0.0 | No |
| 2A_2 | 39712483 | Excalibur_c7971_712      | 19.6 | 0.0 | No |
| 2A_2 | 53691484 | GENE-1294_101            | 19.6 | 0.0 | No |
| 2A_2 | 74654320 | GENE-1294_339            | 19.6 | 0.0 | No |
| 2A_2 | 31782370 | GENE-1303_118            | 19.6 | 0.0 | No |
| 2A_2 | 49637488 | IAAV4880                 | 19.6 | 0.0 | No |
| 2A_2 | 21629357 | IAAV5232                 | 19.6 | 0.0 | No |
| 2A_2 | 51622474 | IAAV6102                 | 19.6 | 0.0 | No |
| 2A_2 | 63770311 | IAAV7287                 | 19.6 | 0.0 | No |
| 2A_2 | 40734468 | Kukri_c11099_1198        | 19.6 | 0.0 | No |
| 2A_2 | 19756378 | Kukri_c21008_657         | 19.6 | 0.0 | No |
| 2A_2 | 34605355 | Kukri_c25632_86          | 19.6 | 0.0 | No |
| 2A_2 | 20631308 | Kukri_c37366_95          | 19.6 | 0.0 | No |
| 2A_2 | 13771418 | Kukri_c44231_1576        | 19.6 | 0.0 | No |
| 2A_2 | 31712370 | Kukri_c50116_107         | 19.6 | 0.0 | No |
| 2A_2 | 45723498 | Kukri_c62704_192         | 19.6 | 0.0 | No |
| 2A_2 | 64623455 | Kukri_c89717_64          | 19.6 | 0.0 | No |
| 2A_2 | 55710334 | Kukri_rep_c71154_1562    | 19.6 | 0.0 | No |
| 2A_2 | 45701329 | RAC875_c22328_1356       | 19.6 | 0.0 | No |
| 2A_2 | 10699363 | RAC875_c259_1339         | 19.6 | 0.0 | No |
| 2A_2 | 53618364 | RAC875_c27530_860        | 19.6 | 0.0 | No |
| 2A_2 | 53695366 | RAC875_c35688_382        | 19.6 | 0.0 | No |
| 2A_2 | 11682354 | RAC875_c37413_569        | 19.6 | 0.0 | No |
| 2A_2 | 18799499 | RAC875_c68651_391        | 19.6 | 0.0 | No |
| 2A_2 | 69622414 | RFL_Contig5122_974       | 19.6 | 0.0 | No |
| 2A_2 | 52726303 | Tdurum_contig10048_207   | 19.6 | 0.0 | No |
| 2A_2 | 12792387 | Tdurum_contig12556_431   | 19.6 | 0.0 | No |
| 2A_2 | 20679320 | Tdurum_contig14482_1073  | 19.6 | 0.0 | No |
| 2A_2 | 68606312 | Tdurum_contig16904_167   | 19.6 | 0.0 | No |
| 2A_2 | 11730442 | Tdurum_contig25539_248   | 19.6 | 0.0 | No |
| 2A_2 | 28772434 | Tdurum_contig42282_10323 | 19.6 | 0.0 | No |
| 2A_2 | 32774307 | Tdurum_contig42282_11463 | 19.6 | 0.0 | No |
| 2A_2 | 56633397 | Tdurum_contig49366_118   | 19.6 | 0.0 | No |

|      |                          |                          |      |     |     |
|------|--------------------------|--------------------------|------|-----|-----|
| 2A_2 | 18655461                 | Tdurum_contig50720_204   | 19.6 | 0.0 | No  |
| 2A_2 | 43611302                 | Tdurum_contig50720_354   | 19.6 | 0.0 | No  |
| 2A_2 | 46647476                 | Tdurum_contig50720_482   | 19.6 | 0.0 | No  |
| 2A_2 | 24725433                 | Tdurum_contig50755_190   | 19.6 | 0.0 | No  |
| 2A_2 | 10781405                 | Tdurum_contig50755_97    | 19.6 | 0.0 | No  |
| 2A_2 | 58699349                 | Tdurum_contig52350_170   | 19.6 | 0.0 | No  |
| 2A_2 | 69631509                 | Tdurum_contig52350_296   | 19.6 | 0.0 | No  |
| 2A_2 | 47724490                 | Tdurum_contig52350_588   | 19.6 | 0.0 | No  |
| 2A_2 | 74628380                 | Tdurum_contig52350_636   | 19.6 | 0.0 | No  |
| 2A_2 | 14796404                 | Tdurum_contig52350_902   | 19.6 | 0.0 | No  |
| 2A_2 | 37660510                 | Tdurum_contig53038_1287  | 19.6 | 0.0 | No  |
| 2A_2 | 20630482                 | Tdurum_contig53038_684   | 19.6 | 0.0 | No  |
| 2A_2 | 58709480                 | Tdurum_contig53038_714   | 19.6 | 0.0 | No  |
| 2A_2 | 53617455                 | Tdurum_contig56321_179   | 19.6 | 0.0 | No  |
| 2A_2 | 29762384                 | Tdurum_contig56321_232   | 19.6 | 0.0 | No  |
| 2A_2 | 25617360                 | Tdurum_contig66353_358   | 19.6 | 0.0 | No  |
| 2A_2 | 58603392                 | Tdurum_contig8350_243    | 19.6 | 0.0 | No  |
| 2A_2 | 66644476                 | Tdurum_contig8350_350    | 19.6 | 0.0 | No  |
| 2A_2 | 47718389                 | Tdurum_contig9224_402    | 19.6 | 0.0 | No  |
| 2A_2 | 50719449                 | Tdurum_contig92425_3144  | 19.6 | 0.0 | No  |
| 2A_2 | 72773503                 | tplb0021g21_595          | 19.6 | 0.0 | No  |
| 2A_2 | 23678484                 | tplb0025l18_1788         | 19.6 | 0.0 | No  |
| 2A_2 | 65621355                 | tplb0057b09_367          | 19.6 | 0.0 | No  |
| 2A_2 | 54795491                 | wsnp_BE498892A_Ta_2_1    | 19.6 | 0.0 | No  |
| 2A_2 | 46654387                 | wsnp_BE498892A_Ta_2_25   | 19.6 | 0.0 | No  |
| 2A_2 | 19795442                 | wsnp_CAP11_c3226_1588070 | 19.6 | 0.0 | No  |
| 2A_2 | 29754448                 | wsnp_Ex_c10555_17235832  | 19.6 | 0.0 | No  |
| 2A_2 | 35746432                 | wsnp_Ex_c10555_17236072  | 19.6 | 0.0 | No  |
| 2A_2 | 62702502                 | wsnp_Ex_c3695_6740063    | 19.6 | 0.0 | No  |
| 2A_2 | 50722472                 | wsnp_Ex_c3695_6740111    | 19.6 | 0.0 | No  |
| 2A_2 | 42717410                 | wsnp_Ex_c3695_6740339    | 19.6 | 0.0 | No  |
| 2A_2 | 60615347                 | wsnp_Ku_c16547_25454123  | 19.6 | 0.0 | No  |
| 2A_2 | 68741369                 | wsnp_Ku_c2838_5354231    | 19.6 | 0.0 | No  |
| 2A_2 | 73789363                 | wsnp_Ku_c2838_5355065    | 19.6 | 0.0 | No  |
| 2A_2 | 25689339                 | BS00010477_51            | 19.6 | 0.0 | Yes |
| 2A_2 | 49681420                 | Kukri_rep_c95118_467     | 19.6 | 0.7 | Yes |
| 2A_2 | <a href="#">wPt-9793</a> | <a href="#">wPt-9793</a> | 20.3 | 0.9 | Yes |
| 2A_2 | 61787461                 | wsnp_Ex_c14639_22695091  | 21.2 | 1.7 | Yes |
| 2A_2 | <a href="#">wPt-9277</a> | <a href="#">wPt-9277</a> | 22.9 | 1.8 | Yes |
| 2A_2 | 47654375                 | BS00023075_51            | 24.7 | 0.0 | Yes |
| 2A_2 | 36673416                 | Excalibur_c35919_107     | 24.7 | 0.0 | No  |
| 2A_2 | 57713477                 | RAC875_c1706_1888        | 24.7 | 0.0 | No  |
| 2A_2 | 13624387                 | RAC875_c6586_946         | 24.7 | 0.0 | No  |
| 2A_2 | 29624442                 | Tdurum_contig10287_329   | 24.7 | 0.0 | No  |

|      |                          |                           |      |     |     |
|------|--------------------------|---------------------------|------|-----|-----|
| 2A_2 | 44636348                 | Tdurum_contig47508_250    | 24.7 | 0.0 | No  |
| 2A_2 | 12613392                 | Tdurum_contig61938_424    | 24.7 | 0.0 | No  |
| 2A_2 | 20690440                 | wsnp_Ex_c2137_4014287     | 24.7 | 0.0 | No  |
| 2A_2 | 74606404                 | wsnp_Ra_c6586_11477949    | 24.7 | 0.1 | No  |
| 2A_2 | 34779482                 | Tdurum_contig54056_501    | 24.8 |     | Yes |
| 2B_1 | <a href="#">wPt-0891</a> | <a href="#">wPt-0891</a>  | 0.0  | 9.7 | Yes |
| 2B_1 | <a href="#">wPt-2929</a> | <a href="#">wPt-2929</a>  | 9.7  | 0.0 | Yes |
| 2B_1 | <a href="#">wPt-4892</a> | <a href="#">wPt-4892</a>  | 9.7  | 0.2 | No  |
| 2B_1 | <a href="#">wPt-4426</a> | <a href="#">wPt-4426</a>  | 9.8  | 1.6 | Yes |
| 2B_1 | 69655337                 | IAAV1535                  | 11.5 | 0.0 | Yes |
| 2B_1 | 13731333                 | CAP7_c16_300              | 11.5 | 0.0 | Yes |
| 2B_1 | <a href="#">wPt-3632</a> | <a href="#">wPt-3632</a>  | 11.5 | 0.1 | Yes |
| 2B_1 | 50694416                 | BobWhite_c24069_152       | 11.6 | 0.0 | Yes |
| 2B_1 | 32750357                 | BobWhite_c24069_257       | 11.6 | 0.0 | No  |
| 2B_1 | 14680386                 | BobWhite_c7274_197        | 11.6 | 0.0 | No  |
| 2B_1 | 28705400                 | BobWhite_c7274_333        | 11.6 | 0.0 | No  |
| 2B_1 | 41672487                 | BS00072349_51             | 11.6 | 0.0 | No  |
| 2B_1 | 46738405                 | CAP7_c16_483              | 11.6 | 0.0 | No  |
| 2B_1 | 59746452                 | Excalibur_c26527_82       | 11.6 | 0.0 | No  |
| 2B_1 | 44732390                 | Excalibur_c74622_265      | 11.6 | 0.0 | No  |
| 2B_1 | 39736350                 | Excalibur_c910_946        | 11.6 | 0.0 | No  |
| 2B_1 | 65621346                 | Excalibur_rep_c109577_191 | 11.6 | 0.0 | No  |
| 2B_1 | 15745504                 | GENE-1056_55              | 11.6 | 0.0 | No  |
| 2B_1 | 34786315                 | Ku_c67680_195             | 11.6 | 0.0 | No  |
| 2B_1 | 46682331                 | Ra_c12604_447             | 11.6 | 0.0 | No  |
| 2B_1 | 41742345                 | RAC875_c19685_944         | 11.6 | 0.0 | No  |
| 2B_1 | 24677389                 | RAC875_c21269_1225        | 11.6 | 0.0 | No  |
| 2B_1 | 32699430                 | RFL_Contig1307_328        | 11.6 | 0.0 | No  |
| 2B_1 | 49660402                 | RFL_Contig1307_382        | 11.6 | 0.0 | No  |
| 2B_1 | 49742392                 | Tdurum_contig10048_447    | 11.6 | 0.0 | No  |
| 2B_1 | 23618503                 | Tdurum_contig10048_61     | 11.6 | 0.0 | No  |
| 2B_1 | 57610447                 | Tdurum_contig52627_496    | 11.6 | 0.0 | No  |
| 2B_1 | 14688315                 | Tdurum_contig52627_726    | 11.6 | 0.0 | No  |
| 2B_1 | 60653416                 | Tdurum_contig9071_215     | 11.6 | 0.0 | No  |
| 2B_1 | 25635449                 | wsnp_Ex_c34303_42642389   | 11.6 | 0.0 | No  |
| 2B_1 | 38722338                 | wsnp_Ra_c17622_26522072   | 11.6 | 1.0 | No  |
| 2B_1 | 39684500                 | Kukri_c4235_764           | 12.5 | 1.4 | Yes |
| 2B_1 | <a href="#">wPt-6643</a> | <a href="#">wPt-6643</a>  | 13.9 | 0.1 | Yes |
| 2B_1 | 17801487                 | Kukri_c17_1246            | 14.0 | 0.0 | Yes |
| 2B_1 | 10785347                 | BobWhite_c20158_834       | 14.1 | 0.0 | Yes |
| 2B_1 | 28642306                 | BobWhite_c928_311         | 14.1 | 0.0 | No  |
| 2B_1 | 26669360                 | BS00007384_51             | 14.1 | 0.0 | No  |
| 2B_1 | 23753503                 | BS00022252_51             | 14.1 | 0.0 | No  |
| 2B_1 | 50627321                 | BS00025106_51             | 14.1 | 0.0 | No  |

|      |          |                          |      |      |     |
|------|----------|--------------------------|------|------|-----|
| 2B_1 | 20626471 | BS00026408_51            | 14.1 | 0.0  | No  |
| 2B_1 | 32642370 | BS00026409_51            | 14.1 | 0.0  | No  |
| 2B_1 | 44745444 | BS00032381_51            | 14.1 | 0.0  | No  |
| 2B_1 | 28806412 | BS00066148_51            | 14.1 | 0.0  | No  |
| 2B_1 | 45688362 | BS00067878_51            | 14.1 | 0.0  | No  |
| 2B_1 | 29782485 | BS00100117_51            | 14.1 | 0.0  | No  |
| 2B_1 | 12787323 | CAP7_c2746_331           | 14.1 | 0.0  | No  |
| 2B_1 | 20707303 | CAP7_c4827_53            | 14.1 | 0.0  | No  |
| 2B_1 | 23623439 | CAP7_c4827_78            | 14.1 | 0.0  | No  |
| 2B_1 | 31629365 | D_contig17550_189        | 14.1 | 0.0  | No  |
| 2B_1 | 69801437 | Excalibur_c12675_1147    | 14.1 | 0.0  | No  |
| 2B_1 | 58704485 | Excalibur_c12675_1395    | 14.1 | 0.0  | No  |
| 2B_1 | 32613498 | Excalibur_c12675_1789    | 14.1 | 0.0  | No  |
| 2B_1 | 58726362 | Excalibur_c2993_457      | 14.1 | 0.0  | No  |
| 2B_1 | 13663316 | Excalibur_c33525_279     | 14.1 | 0.0  | No  |
| 2B_1 | 27702432 | Excalibur_c48404_59      | 14.1 | 0.0  | No  |
| 2B_1 | 34689486 | Excalibur_c73791_215     | 14.1 | 0.0  | No  |
| 2B_1 | 16646387 | Excalibur_c73791_296     | 14.1 | 0.0  | No  |
| 2B_1 | 50744440 | Excalibur_c8919_345      | 14.1 | 0.0  | No  |
| 2B_1 | 19647408 | Excalibur_rep_c67599_677 | 14.1 | 0.0  | No  |
| 2B_1 | 55692471 | Excalibur_rep_c76271_351 | 14.1 | 0.0  | No  |
| 2B_1 | 43732448 | GENE-1119_104            | 14.1 | 0.0  | No  |
| 2B_1 | 39810508 | GENE-1136_260            | 14.1 | 0.0  | No  |
| 2B_1 | 22728388 | GENE-1258_152            | 14.1 | 0.0  | No  |
| 2B_1 | 20618478 | IAAV1798                 | 14.1 | 0.0  | No  |
| 2B_1 | 32777468 | IAAV5401                 | 14.1 | 0.0  | No  |
| 2B_1 | 23801412 | IAAV8570                 | 14.1 | 0.0  | No  |
| 2B_1 | 50626505 | Kukri_c17_967            | 14.1 | 0.0  | No  |
| 2B_1 | 34643454 | Kukri_c3501_1175         | 14.1 | 0.0  | No  |
| 2B_1 | 47661469 | Kukri_c38413_121         | 14.1 | 0.0  | No  |
| 2B_1 | 34768371 | Kukri_c60352_344         | 14.1 | 0.0  | No  |
| 2B_1 | 24662403 | Kukri_c94792_127         | 14.1 | 0.0  | No  |
| 2B_1 | 29623301 | RAC875_c12741_101        | 14.1 | 0.0  | No  |
| 2B_1 | 13614463 | RAC875_c319_1776         | 14.1 | 0.0  | No  |
| 2B_1 | 21698302 | RAC875_c59976_291        | 14.1 | 0.0  | No  |
| 2B_1 | 52672423 | RAC875_c63343_52         | 14.1 | 0.0  | No  |
| 2B_1 | 49753455 | RAC875_c999_612          | 14.1 | 0.0  | No  |
| 2B_1 | 33715361 | Tdurum_contig10295_374   | 14.1 | 0.0  | No  |
| 2B_1 | 23741436 | Tdurum_contig21786_270   | 14.1 | 0.0  | No  |
| 2B_1 | 32633477 | Tdurum_contig27848_179   | 14.1 | 0.0  | No  |
| 2B_1 | 59785412 | Tdurum_contig42064_2318  | 14.1 | 0.0  | No  |
| 2B_1 | 27628332 | wsnp_Ex_c15646_23969140  | 14.1 | 0.0  | No  |
| 2B_1 | 33787433 | wsnp_Ex_c73454_71499715  | 14.1 | 1.0  | No  |
| 2B_1 | 27726461 | BS00098042_51            | 15.0 | 10.4 | Yes |

|      |                          |                              |      |     |     |
|------|--------------------------|------------------------------|------|-----|-----|
| 2B_1 | 26739421                 | RAC875_c21680_1023           | 25.4 | 0.0 | Yes |
| 2B_1 | <a href="#">wPt-8776</a> | <a href="#">wPt-8776</a>     | 25.4 | 0.0 | Yes |
| 2B_1 | 61602385                 | BobWhite_c17767_396          | 25.4 | 0.0 | Yes |
| 2B_1 | 50743508                 | BS00080318_51                | 25.4 | 0.0 | Yes |
| 2B_1 | 15745476                 | BobWhite_rep_c50285_700      | 25.4 | 0.0 | Yes |
| 2B_1 | 50631300                 | BS00003673_51                | 25.5 | 0.0 | Yes |
| 2B_1 | 65606459                 | BS00074091_51                | 25.5 | 0.0 | No  |
| 2B_1 | 71697480                 | BS00102709_51                | 25.5 | 0.0 | No  |
| 2B_1 | 32739390                 | BS00108288_51                | 25.5 | 0.0 | No  |
| 2B_1 | 64703470                 | CAP7_c6910_523               | 25.5 | 0.0 | No  |
| 2B_1 | 57746300                 | Excalibur_c16679_215         | 25.5 | 0.0 | No  |
| 2B_1 | 18808431                 | Excalibur_c9752_619          | 25.5 | 0.0 | No  |
| 2B_1 | 34640333                 | IACX8202                     | 25.5 | 0.0 | No  |
| 2B_1 | 23769304                 | Kukri_c7579_749              | 25.5 | 0.0 | No  |
| 2B_1 | 24676463                 | Kukri_c78358_129             | 25.5 | 0.0 | No  |
| 2B_1 | 33649433                 | Ra_c23972_327                | 25.5 | 0.0 | No  |
| 2B_1 | 52755306                 | Ra_c69149_345                | 25.5 | 0.0 | No  |
| 2B_1 | 54630428                 | RAC875_c31606_234            | 25.5 | 0.0 | No  |
| 2B_1 | 21731393                 | RAC875_c37473_384            | 25.5 | 0.0 | No  |
| 2B_1 | 30623451                 | RAC875_c5673_1209            | 25.5 | 0.0 | No  |
| 2B_1 | 55768354                 | RAC875_c65882_668            | 25.5 | 0.0 | No  |
| 2B_1 | 19756357                 | RFL_Contig5240_1987          | 25.5 | 0.0 | No  |
| 2B_1 | 51694508                 | Tdurum_contig49532_368       | 25.5 | 0.0 | No  |
| 2B_1 | 21645337                 | Tdurum_contig49532_53        | 25.5 | 0.0 | No  |
| 2B_1 | 32679487                 | Tdurum_contig67827_89        | 25.5 | 0.0 | No  |
| 2B_1 | 22752418                 | wsnp_Ex_c10441_17078853      | 25.5 | 0.0 | No  |
| 2B_1 | 42620382                 | wsnp_Ex_rep_c101342_86720058 | 25.5 | 1.5 | No  |
| 2B_1 | 39636318                 | BobWhite_c31708_99           | 26.9 | 6.0 | Yes |
| 2B_1 | <a href="#">wPt-4223</a> | <a href="#">wPt-4223</a>     | 33.0 | 0.0 | Yes |
| 2B_1 | <a href="#">wPt-0510</a> | <a href="#">wPt-0510</a>     | 33.0 | 0.0 | Yes |
| 2B_1 | 60681330                 | Jagger_c914_155              | 33.0 | 0.0 | Yes |
| 2B_1 | 34706422                 | BobWhite_c232_563            | 33.1 | 0.0 | Yes |
| 2B_1 | 21700347                 | BobWhite_c232_625            | 33.1 | 0.0 | No  |
| 2B_1 | 38606365                 | BS00009060_51                | 33.1 | 0.0 | No  |
| 2B_1 | 44610483                 | BS00100981_51                | 33.1 | 0.0 | No  |
| 2B_1 | 42679301                 | Excalibur_c10637_515         | 33.1 | 0.0 | No  |
| 2B_1 | 13682398                 | Excalibur_c91034_141         | 33.1 | 0.0 | No  |
| 2B_1 | 19688410                 | IAAV6288                     | 33.1 | 0.0 | No  |
| 2B_1 | 35610456                 | RAC875_c35399_497            | 33.1 | 1.3 | No  |
| 2B_1 | 58688435                 | BS00043338_51                | 34.3 | 0.5 | Yes |
| 2B_1 | 40638446                 | RAC875_c26697_589            | 34.8 | 0.0 | Yes |
| 2B_1 | 46602308                 | BobWhite_c7050_564           | 34.8 | 0.0 | Yes |
| 2B_1 | 22743493                 | BobWhite_c7050_792           | 34.8 | 0.0 | No  |
| 2B_1 | 15653411                 | BobWhite_c9690_94            | 34.8 | 0.0 | No  |



|      |                          |                             |      |     |     |
|------|--------------------------|-----------------------------|------|-----|-----|
| 2B_1 | 29766476                 | Excalibur_c17745_493        | 34.8 | 0.0 | No  |
| 2B_1 | 24611371                 | Excalibur_c2157_173         | 34.8 | 0.0 | No  |
| 2B_1 | 52659439                 | Excalibur_c37753_655        | 34.8 | 0.0 | No  |
| 2B_1 | 27784362                 | Excalibur_c37753_754        | 34.8 | 0.0 | No  |
| 2B_1 | 21781447                 | RAC875_c16752_283           | 34.8 | 0.0 | No  |
| 2B_1 | 36601300                 | RAC875_c20979_234           | 34.8 | 0.0 | No  |
| 2B_1 | 23633335                 | RAC875_c40992_113           | 34.8 | 0.0 | No  |
| 2B_1 | 52808489                 | RAC875_c40992_68            | 34.8 | 0.0 | No  |
| 2B_1 | 59772405                 | RAC875_c51420_237           | 34.8 | 0.0 | No  |
| 2B_1 | 10770468                 | RAC875_c66695_560           | 34.8 | 0.0 | No  |
| 2B_1 | 29697352                 | RAC875_rep_c83093_126       | 34.8 | 0.0 | No  |
| 2B_1 | 39681367                 | Tdurum_contig15649_215      | 34.8 | 0.0 | No  |
| 2B_1 | 32602398                 | Tdurum_contig28795_219      | 34.8 | 0.0 | No  |
| 2B_1 | 36631436                 | Tdurum_contig28795_273      | 34.8 | 0.0 | No  |
| 2B_1 | 70728339                 | Tdurum_contig28795_322      | 34.8 | 0.0 | No  |
| 2B_1 | 65687358                 | Tdurum_contig28795_381      | 34.8 | 0.0 | No  |
| 2B_1 | 73636380                 | Tdurum_contig59546_695      | 34.8 | 0.0 | No  |
| 2B_1 | 48663490                 | Tdurum_contig9214_279       | 34.8 | 0.0 | No  |
| 2B_1 | 64778463                 | wsnp_Ex_c13865_21720307     | 34.8 | 0.0 | No  |
| 2B_1 | 46690369                 | wsnp_Ex_rep_c67838_66536117 | 34.8 | 0.0 | No  |
| 2B_1 | 37748429                 | wsnp_JD_c12346_12606967     | 34.8 | 0.0 | No  |
| 2B_1 | 24630359                 | wsnp_RFL_Contig3273_3319580 | 34.8 | 0.0 | No  |
| 2B_1 | 26730364                 | wsnp_RFL_Contig3917_4326857 | 34.8 | 1.6 | No  |
| 2B_1 | 36709371                 | BS00039766_51               | 36.4 | 0.0 | Yes |
| 2B_1 | 52753407                 | Excalibur_c33221_681        | 36.4 | 0.0 | No  |
| 2B_1 | 31753300                 | Tdurum_contig28980_211      | 36.4 | 0.0 | No  |
| 2B_1 | 67719486                 | Tdurum_contig47_148         | 36.4 | 0.0 | No  |
| 2B_1 | 13718425                 | Tdurum_contig71365_233      | 36.4 | 0.0 | No  |
| 2B_1 | 34655309                 | Tdurum_contig77036_338      | 36.4 | 0.0 | No  |
| 2B_1 | 17624400                 | Tdurum_contig93103_284      | 36.4 | 0.0 | No  |
| 2B_1 | 30765353                 | tplb0024e19_1029            | 36.4 | 0.0 | No  |
| 2B_1 | 36639495                 | Tdurum_contig67254_504      | 36.4 | 3.1 | Yes |
| 2B_1 | 47726391                 | BS00065327_51               | 39.5 | 0.0 | Yes |
| 2B_1 | 73690361                 | BS00065471_51               | 39.5 | 0.0 | No  |
| 2B_1 | 26690509                 | D_GCE8AKX01DSI7J_273        | 39.5 | 0.0 | No  |
| 2B_1 | 50794327                 | Excalibur_c32980_169        | 39.5 | 0.0 | No  |
| 2B_1 | 74786353                 | RAC875_c59799_932           | 39.5 | 0.0 | No  |
| 2B_1 | 72755454                 | RAC875_rep_c69762_300       | 39.5 | 0.1 | Yes |
| 2B_1 | <a href="#">wPt-0694</a> | <a href="#">wPt-0694</a>    | 39.6 | 1.4 | Yes |
| 2B_1 | 60639321                 | BS00022674_51               | 41.0 | 0.0 | Yes |
| 2B_1 | 20685369                 | Ku_c4168_1399               | 41.0 | 0.0 | No  |
| 2B_1 | 16707455                 | Tdurum_contig17826_338      | 41.0 | 0.0 | No  |
| 2B_1 | 15700467                 | Tdurum_contig45468_674      | 41.0 | 0.0 | No  |
| 2B_1 | 67766365                 | Tdurum_contig56876_1078     | 41.0 | 0.0 | No  |

|      |          |                              |      |     |     |
|------|----------|------------------------------|------|-----|-----|
| 2B_1 | 17718449 | Tdurum_contig56876_365       | 41.0 | 0.0 | No  |
| 2B_1 | 72729495 | Tdurum_contig56876_449       | 41.0 | 0.0 | No  |
| 2B_1 | 57805364 | tplb0040p24_838              | 41.0 | 2.9 | No  |
| 2B_1 | 51630457 | RAC875_c13240_96             | 43.9 | 0.0 | Yes |
| 2B_1 | 52748434 | Tdurum_contig48260_249       | 43.9 | 0.0 | No  |
| 2B_1 | 35795369 | Tdurum_contig64795_494       | 43.9 | 0.0 | No  |
| 2B_1 | 39624360 | wsnp_CAP7_c1592_791887       | 43.9 | 0.0 | No  |
| 2B_1 | 48613443 | wsnp_Ex_c20029_29064315      | 43.9 | 0.0 | No  |
| 2B_1 | 72730302 | wsnp_Ra_c15621_24073604      | 43.9 | 0.0 | No  |
| 2B_1 | 22690425 | wsnp_Ra_c3955_7262354        | 43.9 | 1.4 | No  |
| 2B_1 | 50688426 | BS00063365_51                | 45.3 | 0.0 | Yes |
| 2B_1 | 24613339 | Excalibur_c5801_177          | 45.3 | 0.0 | No  |
| 2B_1 | 30712413 | IAAV1401                     | 45.3 | 0.0 | No  |
| 2B_1 | 16699385 | Tdurum_contig78534_314       | 45.3 | 0.0 | No  |
| 2B_1 | 57734352 | wsnp_Ex_c29382_38422739      | 45.3 | 0.0 | No  |
| 2B_1 | 26702364 | wsnp_Ex_rep_c101581_86924089 | 45.3 | 0.0 | No  |
| 2B_1 | 70654439 | wsnp_Ra_c4660_8405634        | 45.3 | 0.8 | No  |
| 2B_1 | 58663351 | Excalibur_c42512_584         | 46.1 | 0.0 | Yes |
| 2B_1 | 26710506 | IACX6231                     | 46.2 | 0.6 | Yes |
| 2B_1 | 33702307 | BobWhite_c1472_59            | 46.8 | 0.0 | Yes |
| 2B_1 | 48778343 | BobWhite_c2244_314           | 46.8 | 0.0 | No  |
| 2B_1 | 23702409 | BobWhite_c2371_520           | 46.8 | 0.0 | No  |
| 2B_1 | 16699323 | BobWhite_c29596_649          | 46.8 | 0.0 | No  |
| 2B_1 | 20727444 | BobWhite_c32938_264          | 46.8 | 0.0 | No  |
| 2B_1 | 44794401 | BobWhite_c32938_366          | 46.8 | 0.0 | No  |
| 2B_1 | 59781400 | BobWhite_c38001_528          | 46.8 | 0.0 | No  |
| 2B_1 | 36686453 | BobWhite_c4704_304           | 46.8 | 0.0 | No  |
| 2B_1 | 67660499 | BobWhite_c8109_82            | 46.8 | 0.0 | No  |
| 2B_1 | 61697506 | BobWhite_rep_c66891_121      | 46.8 | 0.0 | No  |
| 2B_1 | 13621451 | BS00009511_51                | 46.8 | 0.0 | No  |
| 2B_1 | 35690488 | BS00021682_51                | 46.8 | 0.0 | No  |
| 2B_1 | 42674362 | BS00021896_51                | 46.8 | 0.0 | No  |
| 2B_1 | 49681331 | BS00025649_51                | 46.8 | 0.0 | No  |
| 2B_1 | 72617508 | BS00046164_51                | 46.8 | 0.0 | No  |
| 2B_1 | 45645475 | BS00046165_51                | 46.8 | 0.0 | No  |
| 2B_1 | 10654353 | BS00047070_51                | 46.8 | 0.0 | No  |
| 2B_1 | 24752475 | BS00047073_51                | 46.8 | 0.0 | No  |
| 2B_1 | 70740500 | BS00065136_51                | 46.8 | 0.0 | No  |
| 2B_1 | 66707314 | BS00083820_51                | 46.8 | 0.0 | No  |
| 2B_1 | 51681419 | Excalibur_c1140_1044         | 46.8 | 0.0 | No  |
| 2B_1 | 23795439 | Excalibur_c14988_388         | 46.8 | 0.0 | No  |
| 2B_1 | 10774413 | Excalibur_c14988_872         | 46.8 | 0.0 | No  |
| 2B_1 | 72790412 | Excalibur_c1625_1215         | 46.8 | 0.0 | No  |
| 2B_1 | 67664341 | Excalibur_c27629_473         | 46.8 | 0.0 | No  |

|      |          |                         |      |     |    |
|------|----------|-------------------------|------|-----|----|
| 2B_1 | 35786411 | Excalibur_c36280_764    | 46.8 | 0.0 | No |
| 2B_1 | 27618351 | Excalibur_c46178_303    | 46.8 | 0.0 | No |
| 2B_1 | 56634310 | Excalibur_c65341_303    | 46.8 | 0.0 | No |
| 2B_1 | 59798461 | Excalibur_c7449_587     | 46.8 | 0.0 | No |
| 2B_1 | 72710393 | Excalibur_c80601_278    | 46.8 | 0.0 | No |
| 2B_1 | 53664472 | Excalibur_c80601_308    | 46.8 | 0.0 | No |
| 2B_1 | 41789340 | Excalibur_c80601_83     | 46.8 | 0.0 | No |
| 2B_1 | 32760505 | GENE-0663_75            | 46.8 | 0.0 | No |
| 2B_1 | 33755337 | GENE-0663_864           | 46.8 | 0.0 | No |
| 2B_1 | 21674439 | IAAV2917                | 46.8 | 0.0 | No |
| 2B_1 | 17705500 | IAAV3100                | 46.8 | 0.0 | No |
| 2B_1 | 25750380 | IACX2142                | 46.8 | 0.0 | No |
| 2B_1 | 62612473 | IACX2158                | 46.8 | 0.0 | No |
| 2B_1 | 54665340 | IACX5941                | 46.8 | 0.0 | No |
| 2B_1 | 37718487 | IACX6309                | 46.8 | 0.0 | No |
| 2B_1 | 49617425 | Ku_c12447_2002          | 46.8 | 0.0 | No |
| 2B_1 | 31666342 | Ku_c9369_1965           | 46.8 | 0.0 | No |
| 2B_1 | 54734355 | Kukri_c1314_371         | 46.8 | 0.0 | No |
| 2B_1 | 48797319 | Kukri_c15498_1679       | 46.8 | 0.0 | No |
| 2B_1 | 56721473 | Kukri_c15498_657        | 46.8 | 0.0 | No |
| 2B_1 | 65779369 | Kukri_c84629_315        | 46.8 | 0.0 | No |
| 2B_1 | 30790480 | Kukri_rep_c74359_1069   | 46.8 | 0.0 | No |
| 2B_1 | 42655502 | Ra_c69196_575           | 46.8 | 0.0 | No |
| 2B_1 | 13695380 | RAC875_c10132_462       | 46.8 | 0.0 | No |
| 2B_1 | 50627403 | RAC875_c17455_152       | 46.8 | 0.0 | No |
| 2B_1 | 65798482 | RAC875_c17658_1419      | 46.8 | 0.0 | No |
| 2B_1 | 17619326 | RAC875_c3397_274        | 46.8 | 0.0 | No |
| 2B_1 | 22662381 | RAC875_c81984_707       | 46.8 | 0.0 | No |
| 2B_1 | 71673329 | RAC875_rep_c113405_148  | 46.8 | 0.0 | No |
| 2B_1 | 50725362 | RFL_Contig2577_435      | 46.8 | 0.0 | No |
| 2B_1 | 45662370 | RFL_Contig3044_346      | 46.8 | 0.0 | No |
| 2B_1 | 21746311 | RFL_Contig3172_1752     | 46.8 | 0.0 | No |
| 2B_1 | 17600377 | Tdurum_contig10219_295  | 46.8 | 0.0 | No |
| 2B_1 | 51653429 | Tdurum_contig10219_706  | 46.8 | 0.0 | No |
| 2B_1 | 52649476 | Tdurum_contig12879_1200 | 46.8 | 0.0 | No |
| 2B_1 | 68619428 | Tdurum_contig12879_1384 | 46.8 | 0.0 | No |
| 2B_1 | 65722473 | Tdurum_contig12879_201  | 46.8 | 0.0 | No |
| 2B_1 | 70693421 | Tdurum_contig12879_264  | 46.8 | 0.0 | No |
| 2B_1 | 70746420 | Tdurum_contig12879_320  | 46.8 | 0.0 | No |
| 2B_1 | 53764479 | Tdurum_contig21896_174  | 46.8 | 0.0 | No |
| 2B_1 | 33725324 | Tdurum_contig27907_216  | 46.8 | 0.0 | No |
| 2B_1 | 43735338 | Tdurum_contig27907_359  | 46.8 | 0.0 | No |
| 2B_1 | 56729476 | Tdurum_contig42046_1390 | 46.8 | 0.0 | No |
| 2B_1 | 47650443 | Tdurum_contig42046_1426 | 46.8 | 0.0 | No |

|      |          |                         |      |     |     |
|------|----------|-------------------------|------|-----|-----|
| 2B_1 | 16610365 | Tdurum_contig42046_597  | 46.8 | 0.0 | No  |
| 2B_1 | 47636424 | Tdurum_contig67613_465  | 46.8 | 0.0 | No  |
| 2B_1 | 65800344 | Tdurum_contig70558_492  | 46.8 | 0.0 | No  |
| 2B_1 | 60810394 | Tdurum_contig72054_94   | 46.8 | 0.0 | No  |
| 2B_1 | 63602367 | Tdurum_contig96648_102  | 46.8 | 0.0 | No  |
| 2B_1 | 41650460 | Tdurum_contig96648_192  | 46.8 | 0.0 | No  |
| 2B_1 | 18607311 | tplb0024l03_910         | 46.8 | 0.0 | No  |
| 2B_1 | 12791433 | wsnp_Ex_c13353_21046550 | 46.8 | 0.0 | No  |
| 2B_1 | 60746400 | wsnp_Ex_c19772_28771627 | 46.8 | 0.0 | No  |
| 2B_1 | 41772411 | wsnp_Ex_c24135_33382521 | 46.8 | 0.0 | No  |
| 2B_1 | 37659472 | wsnp_Ex_c24135_33382700 | 46.8 | 0.0 | No  |
| 2B_1 | 50720507 | wsnp_Ex_c28627_37743031 | 46.8 | 0.0 | No  |
| 2B_1 | 67629377 | wsnp_Ex_c3506_6414757   | 46.8 | 0.0 | No  |
| 2B_1 | 63797325 | wsnp_Ex_c3506_6415495   | 46.8 | 0.0 | No  |
| 2B_1 | 59760376 | wsnp_Ex_c3506_6415581   | 46.8 | 0.0 | No  |
| 2B_1 | 54622421 | wsnp_Ex_c5123_9087869   | 46.8 | 0.0 | No  |
| 2B_1 | 42775321 | wsnp_Ex_c5123_9088111   | 46.8 | 0.0 | No  |
| 2B_1 | 74664375 | wsnp_Ex_c5123_9089025   | 46.8 | 0.0 | No  |
| 2B_1 | 72770384 | wsnp_Ex_c5123_9089624   | 46.8 | 0.0 | No  |
| 2B_1 | 43702308 | wsnp_Ex_c9025_15039930  | 46.8 | 0.0 | No  |
| 2B_1 | 47757415 | wsnp_Ku_c15498_24122936 | 46.8 | 0.0 | No  |
| 2B_1 | 65753397 | wsnp_Ku_c7297_12596001  | 46.8 | 0.0 | No  |
| 2B_1 | 71719313 | wsnp_Ku_c9901_16493072  | 46.8 | 0.0 | No  |
| 2B_1 | 35777477 | wsnp_Ra_c16333_24961476 | 46.8 | 0.0 | No  |
| 2B_1 | 71808431 | Kukri_s110874_162       | 46.8 | 0.1 | Yes |
| 2B_1 | 65684320 | RAC875_c54927_238       | 46.8 | 0.0 | Yes |
| 2B_1 | 69617479 | RAC875_c77565_298       | 46.9 | 0.1 | Yes |
| 2B_1 | wPt-8460 | wPt-8460                | 46.9 | 1.6 | Yes |
| 2B_1 | wPt-3651 | wPt-3651                | 48.5 | 0.0 | Yes |
| 2B_1 | wPt-0489 | wPt-0489                | 48.5 | 3.0 | No  |
| 2B_1 | wPt-1646 | wPt-1646                | 51.6 |     | Yes |
| 2B_2 | wPt-9958 | wPt-9958                | 0.0  | 3.7 | Yes |
| 2B_2 | 21741330 | BS00010318_51           | 3.7  | 0.0 | Yes |
| 2B_2 | 57689460 | BS00070050_51           | 3.7  | 0.0 | No  |
| 2B_2 | 66805385 | BS00070051_51           | 3.7  | 0.0 | No  |
| 2B_2 | 39766453 | BS00070900_51           | 3.7  | 0.0 | No  |
| 2B_2 | 62638305 | BS00072619_51           | 3.7  | 0.0 | No  |
| 2B_2 | 37641457 | BS00072620_51           | 3.7  | 0.0 | No  |
| 2B_2 | 26655504 | BS00075303_51           | 3.7  | 0.0 | No  |
| 2B_2 | 70796398 | D_F5XZDLF01CFO7W_135    | 3.7  | 0.0 | No  |
| 2B_2 | 27677385 | GENE-1343_556           | 3.7  | 3.6 | No  |
| 2B_2 | 41745453 | BobWhite_c11397_231     | 7.3  | 0.0 | Yes |
| 2B_2 | 48767343 | BobWhite_c17047_268     | 7.3  | 0.0 | No  |
| 2B_2 | 64642414 | BobWhite_c39433_450     | 7.3  | 0.0 | No  |

|      |                          |                          |      |     |     |
|------|--------------------------|--------------------------|------|-----|-----|
| 2B_2 | 18636303                 | BS00099465_51            | 7.3  | 0.0 | No  |
| 2B_2 | 24797430                 | RAC875_c16656_406        | 7.3  | 0.0 | No  |
| 2B_2 | 21801508                 | Tdurum_contig10208_447   | 7.3  | 0.0 | No  |
| 2B_2 | 47616439                 | Tdurum_contig10208_452   | 7.3  | 6.3 | No  |
| 2B_2 | 56664430                 | BobWhite_c23828_341      | 13.6 | 0.0 | Yes |
| 2B_2 | 52693464                 | BS00013534_51            | 13.6 | 0.0 | No  |
| 2B_2 | 26667460                 | BS00028092_51            | 13.6 | 0.0 | No  |
| 2B_2 | 61731506                 | BS00044806_51            | 13.6 | 0.0 | No  |
| 2B_2 | 52694499                 | BS00086125_51            | 13.6 | 0.0 | No  |
| 2B_2 | 22626378                 | Excalibur_c22179_206     | 13.6 | 0.0 | No  |
| 2B_2 | 65620361                 | Excalibur_c41959_546     | 13.6 | 0.0 | No  |
| 2B_2 | 15737342                 | Excalibur_c841_609       | 13.6 | 0.0 | No  |
| 2B_2 | 22683483                 | IAAV8700                 | 13.6 | 0.0 | No  |
| 2B_2 | 12784390                 | Kukri_c16758_443         | 13.6 | 0.0 | No  |
| 2B_2 | 33674347                 | Kukri_c19815_969         | 13.6 | 0.0 | No  |
| 2B_2 | 10749357                 | Kukri_c41556_619         | 13.6 | 0.0 | No  |
| 2B_2 | 63690352                 | RAC875_c9543_99          | 13.6 | 0.0 | No  |
| 2B_2 | 20676441                 | Tdurum_contig12711_264   | 13.6 | 0.0 | No  |
| 2B_2 | 41611497                 | Tdurum_contig49144_321   | 13.6 | 0.0 | No  |
| 2B_2 | 64701393                 | Tdurum_contig51145_187   | 13.6 | 0.0 | No  |
| 2B_2 | 61677412                 | Tdurum_contig51145_476   | 13.6 | 0.0 | No  |
| 2B_2 | 20680425                 | Tdurum_contig54649_798   | 13.6 | 0.0 | No  |
| 2B_2 | 49747371                 | Tdurum_contig54649_915   | 13.6 | 0.0 | No  |
| 2B_2 | 35678315                 | Tdurum_contig93602_268   | 13.6 | 0.0 | No  |
| 2B_2 | 48705437                 | Tdurum_contig93602_338   | 13.6 | 0.6 | No  |
| 2B_2 | 15751334                 | BS00043055_51            | 14.2 | 0.0 | Yes |
| 2B_2 | 43804354                 | Excalibur_c22179_119     | 14.2 | 0.0 | No  |
| 2B_2 | 26686323                 | wsnp_Ex_c18354_27181431  | 14.2 | 0.0 | No  |
| 2B_2 | 66657505                 | BobWhite_c15035_469      | 14.2 | 0.0 | Yes |
| 2B_2 | 24669449                 | BS00085748_51            | 14.2 | 0.0 | No  |
| 2B_2 | 44730476                 | BS00086109_51            | 14.2 | 0.0 | No  |
| 2B_2 | 35707472                 | BS00100466_51            | 14.2 | 0.0 | No  |
| 2B_2 | 72687471                 | BS00108016_51            | 14.2 | 0.0 | No  |
| 2B_2 | 37707385                 | Excalibur_c1787_1037     | 14.2 | 0.0 | No  |
| 2B_2 | 14720403                 | Kukri_c12804_620         | 14.2 | 0.0 | No  |
| 2B_2 | 36787389                 | Kukri_c22513_1780        | 14.2 | 0.0 | No  |
| 2B_2 | 11620340                 | Kukri_rep_c92967_369     | 14.2 | 0.0 | No  |
| 2B_2 | 15605329                 | wsnp_Ex_c18354_27181086  | 14.2 | 0.2 | No  |
| 2B_2 | 37723456                 | Tdurum_contig48835_437   | 14.4 | 0.0 | Yes |
| 2B_2 | <a href="#">wPt-2106</a> | <a href="#">wPt-2106</a> | 14.4 | 0.3 | Yes |
| 2B_2 | 21800346                 | RAC875_rep_c69222_996    | 14.7 | 3.5 | Yes |
| 2B_2 | 10764355                 | BS00023068_51            | 18.2 | 0.0 | Yes |
| 2B_2 | 24643394                 | BS00027693_51            | 18.2 | 0.0 | No  |
| 2B_2 | 53720394                 | Excalibur_c10406_1949    | 18.2 | 0.0 | No  |

|      |                          |                          |      |     |     |
|------|--------------------------|--------------------------|------|-----|-----|
| 2B_2 | 33794395                 | Excalibur_c34937_710     | 18.2 | 0.0 | No  |
| 2B_2 | 49766350                 | Excalibur_c34937_734     | 18.2 | 0.0 | No  |
| 2B_2 | 47773390                 | GENE-1230_189            | 18.2 | 0.0 | No  |
| 2B_2 | 28808481                 | Kukri_c7339_1716         | 18.2 | 0.0 | No  |
| 2B_2 | 23784373                 | Kukri_rep_c110389_569    | 18.2 | 0.0 | No  |
| 2B_2 | 38692329                 | Kukri_rep_c117487_334    | 18.2 | 0.0 | No  |
| 2B_2 | 66797388                 | RAC875_c38665_247        | 18.2 | 0.0 | No  |
| 2B_2 | 16758425                 | RAC875_c5577_1682        | 18.2 | 2.7 | No  |
| 2B_2 | 37809448                 | wsnp_Ku_c3663_6748611    | 20.9 |     | Yes |
| 2B_3 | 61699435                 | Kukri_c8177_718          | 0.0  | 0.0 | Yes |
| 2B_3 | 65704370                 | Tdurum_contig27880_199   | 0.0  | 0.0 | No  |
| 2B_3 | 10695335                 | Tdurum_contig27880_75    | 0.0  | 0.0 | No  |
| 2B_3 | 18618450                 | Tdurum_contig42504_1634  | 0.0  | 0.0 | No  |
| 2B_3 | 64639491                 | Tdurum_contig48833_736   | 0.0  | 0.0 | No  |
| 2B_3 | 38739342                 | Tdurum_contig62998_380   | 0.0  | 0.0 | No  |
| 2B_3 | 53722380                 | wsnp_Ex_c29445_38480890  | 0.0  | 0.2 | No  |
| 2B_3 | 12770423                 | Tdurum_contig64416_441   | 0.2  | 4.3 | Yes |
| 2B_3 | 48621301                 | Excalibur_c22285_762     | 4.4  | 0.0 | Yes |
| 2B_3 | 45671323                 | Excalibur_rep_c86787_98  | 4.4  | 8.7 | No  |
| 2B_3 | 32645403                 | BobWhite_c8113_532       | 13.2 | 0.0 | Yes |
| 2B_3 | 65809315                 | wsnp_Ex_c7003_12065642   | 13.2 | 0.0 | No  |
| 2B_3 | 22660468                 | wsnp_Ex_c7003_12065828   | 13.2 | 3.0 | No  |
| 2B_3 | 58615442                 | RAC875_rep_c96091_211    | 16.2 |     | Yes |
| 3A   | <a href="#">wPt-8362</a> | <a href="#">wPt-8362</a> | 0.0  | 4.3 | Yes |
| 3A   | 69631338                 | Tdurum_contig29045_84    | 4.3  | 0.0 | Yes |
| 3A   | 54672504                 | Tdurum_contig48522_227   | 4.3  | 0.0 | No  |
| 3A   | 45724455                 | Tdurum_contig48522_295   | 4.3  | 0.0 | No  |
| 3A   | 25789348                 | Tdurum_contig48522_635   | 4.3  | 1.3 | No  |
| 3A   | 28803467                 | BobWhite_c716_644        | 5.6  | 0.0 | Yes |
| 3A   | 56801435                 | BobWhite_c8674_595       | 5.6  | 0.0 | No  |
| 3A   | 36656442                 | BS00064445_51            | 5.6  | 0.0 | No  |
| 3A   | 70784423                 | CAP7_rep_c12940_130      | 5.6  | 0.0 | No  |
| 3A   | 33745405                 | Excalibur_c18747_1292    | 5.6  | 0.0 | No  |
| 3A   | 58655318                 | IAAV969                  | 5.6  | 0.0 | No  |
| 3A   | 24794331                 | Kukri_c15102_505         | 5.6  | 0.0 | No  |
| 3A   | 67790477                 | Kukri_c27572_1338        | 5.6  | 0.0 | No  |
| 3A   | 46754407                 | RAC875_c14370_1319       | 5.6  | 0.0 | No  |
| 3A   | 63707393                 | RAC875_c62012_382        | 5.6  | 0.0 | No  |
| 3A   | 71767426                 | RAC875_c947_383          | 5.6  | 0.0 | No  |
| 3A   | 22704344                 | Tdurum_contig42150_2422  | 5.6  | 0.0 | No  |
| 3A   | 69758398                 | Tdurum_contig42150_3190  | 5.6  | 0.0 | No  |
| 3A   | 19657446                 | Tdurum_contig42150_3198  | 5.6  | 0.0 | No  |
| 3A   | 38646431                 | Tdurum_contig42150_3348  | 5.6  | 0.0 | No  |
| 3A   | 27636311                 | Tdurum_contig42150_3417  | 5.6  | 0.0 | No  |

|    |                          |                              |      |     |     |
|----|--------------------------|------------------------------|------|-----|-----|
| 3A | 22610342                 | Tdurum_contig42150_3440      | 5.6  | 0.0 | No  |
| 3A | 58638463                 | Tdurum_contig42647_1727      | 5.6  | 0.0 | No  |
| 3A | 74803455                 | Tdurum_contig49022_293       | 5.6  | 0.0 | No  |
| 3A | 29601457                 | Tdurum_contig55560_972       | 5.6  | 0.0 | No  |
| 3A | 23700493                 | Tdurum_contig57552_327       | 5.6  | 0.0 | No  |
| 3A | 10751415                 | Tdurum_contig61190_271       | 5.6  | 0.0 | No  |
| 3A | 60795494                 | wsnp_Ex_c18747_27625264      | 5.6  | 0.0 | No  |
| 3A | 65726404                 | wsnp_Ex_c35861_43926854      | 5.6  | 0.0 | No  |
| 3A | 28638482                 | wsnp_Ex_rep_c104327_89077792 | 5.6  | 0.0 | No  |
| 3A | 17658459                 | wsnp_Ex_rep_c69919_68881108  | 5.6  | 0.5 | No  |
| 3A | <a href="#">wPt-1119</a> | <a href="#">wPt-1119</a>     | 6.0  | 3.7 | Yes |
| 3A | 17766473                 | BS00047668_51                | 9.7  | 0.0 | Yes |
| 3A | 52648401                 | BS00048355_51                | 9.7  | 0.0 | No  |
| 3A | 59712366                 | Excalibur_c60581_62          | 9.7  | 0.0 | No  |
| 3A | 58640508                 | GENE-1634_405                | 9.7  | 0.0 | No  |
| 3A | 13629447                 | Kukri_rep_c72850_358         | 9.7  | 0.0 | No  |
| 3A | 48640431                 | RAC875_c53238_455            | 9.7  | 0.0 | No  |
| 3A | 64756488                 | RAC875_c57977_121            | 9.7  | 0.0 | No  |
| 3A | 34683459                 | TA001383-0516                | 9.7  | 0.0 | No  |
| 3A | 22806469                 | Tdurum_contig13671_297       | 9.7  | 0.0 | No  |
| 3A | 73777333                 | Tdurum_contig34453_179       | 9.7  | 0.0 | No  |
| 3A | 22702507                 | Tdurum_contig47186_1848      | 9.7  | 0.0 | No  |
| 3A | 21682306                 | Tdurum_contig47186_1897      | 9.7  | 0.0 | No  |
| 3A | 22652317                 | Tdurum_contig51341_630       | 9.7  | 0.0 | No  |
| 3A | 30694359                 | Tdurum_contig83333_238       | 9.7  | 6.2 | No  |
| 3A | 54735391                 | BS00066319_51                | 15.9 | 0.0 | Yes |
| 3A | 26736331                 | RAC875_rep_c109433_782       | 15.9 | 0.0 | No  |
| 3A | 68756308                 | Tdurum_contig12557_1382      | 15.9 | 0.0 | No  |
| 3A | 38689445                 | Tdurum_contig76105_124       | 15.9 | 0.0 | No  |
| 3A | 27650509                 | Tdurum_contig76105_201       | 15.9 | 1.5 | No  |
| 3A | 41755404                 | Tdurum_contig27968_156       | 17.4 | 0.0 | Yes |
| 3A | 15631456                 | Tdurum_contig42827_1693      | 17.4 | 0.0 | No  |
| 3A | 46650488                 | Tdurum_contig47509_93        | 17.4 | 0.0 | No  |
| 3A | 36756372                 | Tdurum_contig64606_1104      | 17.4 | 0.0 | No  |
| 3A | 53803498                 | Tdurum_contig64606_1106      | 17.4 | 0.0 | No  |
| 3A | 20679356                 | Tdurum_contig64606_1309      | 17.4 | 0.0 | No  |
| 3A | 46673342                 | Tdurum_contig76296_461       | 17.4 | 2.9 | No  |
| 3A | 49641502                 | BobWhite_c2868_183           | 20.3 | 0.0 | Yes |
| 3A | 28648318                 | Ex_c22149_916                | 20.3 | 0.0 | No  |
| 3A | 45740461                 | Excalibur_c38597_243         | 20.3 | 0.0 | No  |
| 3A | 53700300                 | Kukri_rep_c111139_338        | 20.3 | 4.2 | No  |
| 3A | 62755505                 | BS00031289_51                | 24.6 | 0.0 | Yes |
| 3A | 52780390                 | IAAV902                      | 24.6 | 0.0 | No  |
| 3A | 40687387                 | IACX787                      | 24.6 | 0.0 | No  |

|    |          |                             |      |      |     |
|----|----------|-----------------------------|------|------|-----|
| 3A | 63644328 | Kukri_c37815_53             | 24.6 | 0.0  | No  |
| 3A | 54627378 | Kukri_c41296_172            | 24.6 | 0.0  | No  |
| 3A | 66706397 | RAC875_c744_1935            | 24.6 | 0.0  | No  |
| 3A | 38736451 | Tdurum_contig11714_304      | 24.6 | 0.0  | No  |
| 3A | 64775465 | Tdurum_contig43475_978      | 24.6 | 0.0  | No  |
| 3A | 63609438 | Tdurum_contig61819_115      | 24.6 | 0.0  | No  |
| 3A | 63615432 | wsnp_Ex_c1039_1990833       | 24.6 | 0.0  | No  |
| 3A | 38689417 | wsnp_Ra_c744_1535534        | 24.6 | 1.2  | No  |
| 3A | 13623337 | RAC875_s120038_124          | 25.7 | 0.3  | Yes |
| 3A | 53667447 | BS00003971_51               | 26.1 | 0.0  | Yes |
| 3A | 45751329 | BS00064039_51               | 26.1 | 0.0  | No  |
| 3A | 52614321 | Excalibur_c33545_134        | 26.1 | 0.0  | No  |
| 3A | 52659487 | IACX6277                    | 26.1 | 0.0  | No  |
| 3A | 12611357 | Ku_c70534_1215              | 26.1 | 0.0  | No  |
| 3A | 62626480 | Kukri_rep_c87640_135        | 26.1 | 0.0  | No  |
| 3A | 45623326 | RAC875_c58159_521           | 26.1 | 0.0  | No  |
| 3A | 19735399 | Tdurum_contig98188_239      | 26.1 | 0.0  | No  |
| 3A | 19790464 | wsnp_Ex_c12750_20243224     | 26.1 | 0.0  | No  |
| 3A | 38604331 | wsnp_Ex_c28930_38008757     | 26.1 | 0.0  | No  |
| 3A | 65618393 | wsnp_Ex_rep_c66685_65003087 | 26.1 | 0.0  | No  |
| 3A | 14627315 | wsnp_Ex_rep_c69864_68823765 | 26.1 | 0.0  | No  |
| 3A | 62662440 | wsnp_Ex_rep_c69864_68824236 | 26.1 | 0.0  | No  |
| 3A | 45683390 | wsnp_Ex_rep_c69864_68824319 | 26.1 | 0.0  | No  |
| 3A | 54744349 | wsnp_Ku_c23901_33846711     | 26.1 | 0.0  | No  |
| 3A | 57707371 | wsnp_Ku_c5378_9559013       | 26.1 | 0.0  | No  |
| 3A | 74709325 | wsnp_Ra_c34117_42876812     | 26.1 | 16.1 | No  |
| 3A | 47655304 | BS00067215_51               | 42.2 | 0.0  | Yes |
| 3A | 32695491 | BS00067216_51               | 42.2 | 0.0  | No  |
| 3A | 25717488 | Kukri_rep_c70575_722        | 42.2 | 0.0  | No  |
| 3A | 61680502 | Tdurum_contig56960_109      | 42.2 | 0.0  | No  |
| 3A | 10614475 | Tdurum_contig9063_299       | 42.2 | 1.6  | No  |
| 3A | 73626376 | RAC875_rep_c109288_122      | 43.8 | 0.0  | Yes |
| 3A | 40781328 | RFL_Contig1170_1827         | 43.8 | 0.0  | No  |
| 3A | 16796370 | Tdurum_contig44029_144      | 43.8 | 0.0  | No  |
| 3A | 13620387 | Tdurum_contig44029_158      | 43.8 | 0.0  | No  |
| 3A | 36637307 | Tdurum_contig44029_621      | 43.8 | 0.0  | No  |
| 3A | 32622505 | Tdurum_contig44029_66       | 43.8 | 5.1  | No  |
| 3A | 13747438 | Excalibur_c6852_799         | 48.9 | 1.2  | Yes |
| 3A | 47620366 | wsnp_Ex_c15674_24005648     | 50.0 | 0.0  | Yes |
| 3A | 58796306 | BobWhite_c20673_447         | 50.1 | 0.0  | Yes |
| 3A | 27733302 | BobWhite_c29419_116         | 50.1 | 0.0  | No  |
| 3A | 15767467 | BS00048757_51               | 50.1 | 0.0  | No  |
| 3A | 10710416 | BS00065956_51               | 50.1 | 0.0  | No  |
| 3A | 52688441 | Excalibur_c25239_283        | 50.1 | 0.0  | No  |



|      |          |                           |      |      |     |
|------|----------|---------------------------|------|------|-----|
| 3A   | 57606487 | Excalibur_c27972_320      | 50.1 | 0.0  | No  |
| 3A   | 32784402 | Excalibur_c47078_512      | 50.1 | 0.0  | No  |
| 3A   | 53652341 | Kukri_c4568_1708          | 50.1 | 0.0  | No  |
| 3A   | 17810490 | Kukri_c47091_511          | 50.1 | 0.0  | No  |
| 3A   | 34717477 | Kukri_c80974_619          | 50.1 | 0.0  | No  |
| 3A   | 13780446 | RAC875_c37084_107         | 50.1 | 0.0  | No  |
| 3A   | 11677367 | wsnp_Ex_c15674_24004513   | 50.1 | 0.0  | No  |
| 3A   | 52605411 | wsnp_Ex_c15674_24004810   | 50.1 | 1.3  | No  |
| 3A   | 25750351 | Tdurum_contig45380_92     | 51.4 | 0.0  | Yes |
| 3A   | 47775460 | BobWhite_c11997_246       | 51.4 | 0.0  | Yes |
| 3A   | 16688467 | Excalibur_c11594_497      | 51.4 | 0.0  | No  |
| 3A   | 53654390 | Excalibur_c1806_1285      | 51.4 | 0.0  | No  |
| 3A   | 23686458 | Excalibur_c34472_211      | 51.4 | 0.0  | No  |
| 3A   | 15626411 | Excalibur_c64214_703      | 51.4 | 0.0  | No  |
| 3A   | 14804374 | Kukri_c32377_237          | 51.4 | 0.0  | No  |
| 3A   | 66619323 | Kukri_c32377_399          | 51.4 | 0.0  | No  |
| 3A   | 17753434 | Kukri_c32377_557          | 51.4 | 0.0  | No  |
| 3A   | 35663342 | Kukri_c56638_212          | 51.4 | 0.0  | No  |
| 3A   | 39801401 | RAC875_c584_303           | 51.4 | 0.0  | No  |
| 3A   | 58612324 | RAC875_c64107_404         | 51.4 | 0.0  | No  |
| 3A   | 57675320 | RAC875_rep_c109701_76     | 51.4 | 0.0  | No  |
| 3A   | 20744403 | TA015264-0958             | 51.4 | 0.0  | No  |
| 3A   | 35644506 | Tdurum_contig12371_132    | 51.4 | 0.0  | No  |
| 3A   | 37686410 | Tdurum_contig12371_197    | 51.4 | 0.0  | No  |
| 3A   | 50662311 | Tdurum_contig29847_479    | 51.4 | 0.0  | No  |
| 3A   | 12736430 | Tdurum_contig30718_308    | 51.4 | 0.0  | No  |
| 3A   | 37807482 | Tdurum_contig30718_383    | 51.4 | 0.0  | No  |
| 3A   | 44649395 | Tdurum_contig59358_392    | 51.4 | 0.0  | No  |
| 3A   | 65739441 | Tdurum_contig5961_2764    | 51.4 | 0.0  | No  |
| 3A   | 15656351 | Tdurum_contig60260_89     | 51.4 | 0.0  | No  |
| 3A   | 35658391 | Tdurum_contig74920_757    | 51.4 | 0.0  | No  |
| 3A   | 16772374 | Tdurum_contig91865_242    | 51.4 | 0.0  | No  |
| 3A   | 58717351 | Tdurum_contig99640_243    | 51.4 | 0.1  | No  |
| 3A   | 12614475 | Tdurum_contig12371_248    | 51.5 | 2.4  | Yes |
| 3A   | 20685407 | BS00021981_51             | 53.9 | 0.0  | Yes |
| 3A   | 32700373 | Kukri_rep_c102953_304     | 53.9 | 0.0  | No  |
| 3A   | 46614379 | wsnp_Ex_c742_1458033      | 53.9 |      | No  |
| 3B_1 | 28698354 | Excalibur_rep_c104387_443 | 0.0  | 12.3 | Yes |
| 3B_1 | 18723442 | Kukri_c22235_1547         | 12.3 | 0.0  | Yes |
| 3B_1 | 30704353 | wsnp_Ex_c2500_4671165     | 12.3 | 0.1  | No  |
| 3B_1 | 18702365 | Excalibur_c27057_401      | 12.4 | 4.4  | Yes |
| 3B_1 | 32737338 | BS00010277_51             | 16.8 | 0.0  | Yes |
| 3B_1 | 48630476 | BS00064896_51             | 16.8 | 0.0  | No  |
| 3B_1 | 59797441 | Kukri_rep_c114800_56      | 16.8 | 0.0  | No  |

|      |                          |                              |      |      |     |
|------|--------------------------|------------------------------|------|------|-----|
| 3B_1 | 55762454                 | Tdurum_contig45817_193       | 16.8 | 3.0  | No  |
| 3B_1 | 20688474                 | BS00021992_51                | 19.8 | 0.0  | Yes |
| 3B_1 | 69689427                 | BS00068473_51                | 19.8 | 0.0  | No  |
| 3B_1 | 64717480                 | TA009924-0526                | 19.8 | 0.0  | No  |
| 3B_1 | 15766400                 | Tdurum_contig44221_1085      | 19.8 | 0.0  | No  |
| 3B_1 | 56622341                 | wsnp_CAP7_c5097_2266314      | 19.8 | 1.4  | No  |
| 3B_1 | 53695414                 | Excalibur_c50953_96          | 21.2 | 0.0  | Yes |
| 3B_1 | 10637452                 | Kukri_c24007_83              | 21.2 | 1.6  | No  |
| 3B_1 | 33717308                 | BobWhite_c13381_101          | 22.8 | 0.0  | Yes |
| 3B_1 | 47782463                 | GENE-1512_152                | 22.8 | 0.0  | No  |
| 3B_1 | 30784390                 | Kukri_c668_316               | 22.8 | 0.0  | No  |
| 3B_1 | 37689441                 | Tdurum_contig60330_1230      | 22.8 | 0.0  | No  |
| 3B_1 | 31787395                 | Tdurum_contig60330_126       | 22.8 | 0.0  | No  |
| 3B_1 | 17714376                 | wsnp_Ra_c67016_65144188      | 22.8 | 1.2  | No  |
| 3B_1 | 42772488                 | Tdurum_contig15928_135       | 24.0 | 0.0  | Yes |
| 3B_1 | 10693444                 | Tdurum_contig46030_580       | 24.0 | 0.3  | No  |
| 3B_1 | <a href="#">wPt-9049</a> | <a href="#">wPt-9049</a>     | 24.3 | 0.8  | Yes |
| 3B_1 | 51780351                 | Kukri_c35451_857             | 25.1 | 1.7  | Yes |
| 3B_1 | <a href="#">wPt-2698</a> | <a href="#">wPt-2698</a>     | 26.8 | 12.1 | Yes |
| 3B_1 | 26651478                 | GENE-2105_409                | 38.9 | 0.0  | Yes |
| 3B_1 | 66750499                 | Kukri_c41129_344             | 38.9 | 0.0  | No  |
| 3B_1 | 39805406                 | Kukri_rep_c93484_422         | 38.9 | 2.8  | No  |
| 3B_1 | 55609449                 | Ra_c35_3184                  | 41.7 | 0.0  | Yes |
| 3B_1 | 33800419                 | RFL_Contig679_784            | 41.7 | 0.0  | No  |
| 3B_1 | 22761426                 | Tdurum_contig48528_144       | 41.7 | 0.0  | No  |
| 3B_1 | 12619370                 | Tdurum_contig48528_320       | 41.7 | 0.0  | No  |
| 3B_1 | 16738367                 | wsnp_JD_c4413_5541190        | 41.7 | 1.8  | No  |
| 3B_1 | 47643464                 | RAC875_c65295_290            | 43.5 | 1.3  | Yes |
| 3B_1 | 58673391                 | Excalibur_c33274_498         | 44.8 | 0.0  | Yes |
| 3B_1 | 63608350                 | Tdurum_contig11443_1022      | 44.8 | 0.0  | No  |
| 3B_1 | 66746403                 | Tdurum_contig11443_978       | 44.8 | 0.0  | No  |
| 3B_1 | 31800387                 | Tdurum_contig12643_514       | 44.8 | 0.0  | No  |
| 3B_1 | 20628306                 | Tdurum_contig67350_494       | 44.8 | 0.0  | No  |
| 3B_1 | 59785402                 | Tdurum_contig67350_771       | 44.8 | 0.0  | No  |
| 3B_1 | 66747440                 | Tdurum_contig93431_129       | 44.8 | 0.0  | No  |
| 3B_1 | 29709317                 | Tdurum_contig93431_485       | 44.8 | 0.0  | No  |
| 3B_1 | 55764410                 | wsnp_Ex_c19778_28779907      | 44.8 | 0.0  | No  |
| 3B_1 | 37787404                 | wsnp_Ex_rep_c101457_86817938 | 44.8 | 3.6  | No  |
| 3B_1 | 51725372                 | BobWhite_c33344_143          | 48.4 | 0.0  | Yes |
| 3B_1 | 56649386                 | IAAV6566                     | 48.4 | 0.0  | No  |
| 3B_1 | 48801360                 | RAC875_c42186_335            | 48.4 | 0.0  | No  |
| 3B_1 | 57715474                 | Tdurum_contig8365_319        | 48.4 | 0.0  | No  |
| 3B_1 | 70798451                 | Tdurum_contig8365_433        | 48.4 | 5.2  | No  |
| 3B_1 | 29786484                 | Tdurum_contig66511_957       | 53.6 | 0.1  | Yes |

|      |          |                              |      |     |     |
|------|----------|------------------------------|------|-----|-----|
| 3B_1 | 60794449 | BobWhite_c22794_470          | 53.6 | 0.0 | Yes |
| 3B_1 | 14790458 | BobWhite_rep_c66990_212      | 53.6 | 0.0 | No  |
| 3B_1 | 70704318 | BobWhite_rep_c66990_294      | 53.6 | 0.0 | No  |
| 3B_1 | 47602326 | BS00031402_51                | 53.6 | 0.0 | No  |
| 3B_1 | 11635307 | Ex_c25520_449                | 53.6 | 0.0 | No  |
| 3B_1 | 36766472 | Excalibur_c35526_537         | 53.6 | 0.0 | No  |
| 3B_1 | 15725480 | Excalibur_c60319_127         | 53.6 | 0.0 | No  |
| 3B_1 | 33722324 | Excalibur_c8998_469          | 53.6 | 0.0 | No  |
| 3B_1 | 19658302 | GENE-1167_104                | 53.6 | 0.0 | No  |
| 3B_1 | 38606445 | IAAV3519                     | 53.6 | 0.0 | No  |
| 3B_1 | 47729463 | IAAV4125                     | 53.6 | 0.0 | No  |
| 3B_1 | 49778449 | IAAV8554                     | 53.6 | 0.0 | No  |
| 3B_1 | 17711472 | Ku_c12345_328                | 53.6 | 0.0 | No  |
| 3B_1 | 66667378 | Kukri_c11147_22              | 53.6 | 0.0 | No  |
| 3B_1 | 30697489 | Kukri_c14832_407             | 53.6 | 0.0 | No  |
| 3B_1 | 59792383 | Ra_c44591_213                | 53.6 | 0.0 | No  |
| 3B_1 | 53661500 | RAC875_c19810_278            | 53.6 | 0.0 | No  |
| 3B_1 | 39629370 | Tdurum_contig76671_435       | 53.6 | 0.0 | No  |
| 3B_1 | 67672417 | wsnp_Ex_c3040_5615597        | 53.6 | 2.8 | No  |
| 3B_1 | 66607435 | Excalibur_c34754_108         | 56.4 | 0.0 | Yes |
| 3B_1 | 61625482 | RAC875_c65292_58             | 56.4 | 3.3 | No  |
| 3B_1 | 55761400 | BS00032926_51                | 59.8 | 0.0 | Yes |
| 3B_1 | 25753437 | Ex_c4757_695                 | 59.8 | 8.6 | No  |
| 3B_1 | 15638485 | Tdurum_contig49991_103       | 68.4 | 0.0 | Yes |
| 3B_1 | 33808302 | wsnp_Ex_c11313_18277285      | 68.4 | 0.0 | No  |
| 3B_1 | 13771400 | wsnp_Ex_c11313_18277396      | 68.4 | 3.1 | No  |
| 3B_1 | 32748374 | BS00087278_51                | 71.5 | 0.1 | Yes |
| 3B_1 | 36722411 | BobWhite_c21036_213          | 71.5 | 0.0 | Yes |
| 3B_1 | 50704359 | BS00005265_51                | 71.5 | 0.0 | No  |
| 3B_1 | 67801480 | BS00087279_51                | 71.5 | 0.0 | No  |
| 3B_1 | 30808364 | CAP7_c3667_77                | 71.5 | 0.0 | No  |
| 3B_1 | 72738345 | Excalibur_c18060_449         | 71.5 | 0.0 | No  |
| 3B_1 | 47677321 | Excalibur_c6325_949          | 71.5 | 0.0 | No  |
| 3B_1 | 58800347 | Excalibur_rep_c106935_390    | 71.5 | 0.0 | No  |
| 3B_1 | 22628396 | Jagger_c5649_59              | 71.5 | 0.0 | No  |
| 3B_1 | 65677451 | Kukri_rep_c107421_115        | 71.5 | 0.0 | No  |
| 3B_1 | 22750491 | RAC875_c20275_1619           | 71.5 | 0.0 | No  |
| 3B_1 | 59670466 | RAC875_c50661_279            | 71.5 | 0.0 | No  |
| 3B_1 | 21802410 | RAC875_rep_c116515_181       | 71.5 | 0.0 | No  |
| 3B_1 | 53745482 | wsnp_Ex_c12887_20427158      | 71.5 | 0.0 | No  |
| 3B_1 | 37656475 | wsnp_Ex_rep_c110375_92775402 | 71.5 | 6.2 | No  |
| 3B_1 | 63681357 | BS00068494_51                | 77.7 | 0.0 | Yes |
| 3B_1 | 60720480 | Tdurum_contig49477_548       | 77.7 | 0.1 | No  |
| 3B_1 | 69788382 | Excalibur_c5416_846          | 77.8 | 0.0 | Yes |

|      |          |                             |      |     |     |
|------|----------|-----------------------------|------|-----|-----|
| 3B_1 | 35631318 | Ku_c71049_1180              | 77.8 | 0.0 | No  |
| 3B_1 | 25607393 | TA002266-1244               | 77.8 | 0.0 | No  |
| 3B_1 | 31754310 | Tdurum_contig48224_272      | 77.8 | 0.0 | No  |
| 3B_1 | 60603486 | Tdurum_contig49477_187      | 77.8 | 0.0 | No  |
| 3B_1 | 65624454 | Tdurum_contig63110_433      | 77.8 | 0.0 | No  |
| 3B_1 | 69788323 | wsnp_RFL_Contig383_4163148  | 77.8 | 1.5 | No  |
| 3B_1 | 34761381 | BS00037536_51               | 79.3 | 0.0 | Yes |
| 3B_1 | 47765308 | BS00089166_51               | 79.3 | 0.0 | No  |
| 3B_1 | 39733361 | Ex_c5074_1539               | 79.3 | 0.0 | No  |
| 3B_1 | 33647370 | Excalibur_c5921_1315        | 79.3 | 0.0 | No  |
| 3B_1 | 23744320 | Excalibur_c80041_400        | 79.3 | 0.0 | No  |
| 3B_1 | 33646407 | GENE-1455_114               | 79.3 | 0.0 | No  |
| 3B_1 | 52781325 | IAAV1382                    | 79.3 | 0.0 | No  |
| 3B_1 | 31660486 | IAAV2739                    | 79.3 | 0.0 | No  |
| 3B_1 | 14685388 | Ku_c101932_436              | 79.3 | 0.0 | No  |
| 3B_1 | 18753390 | Kukri_rep_c108929_91        | 79.3 | 0.0 | No  |
| 3B_1 | 44661468 | wsnp_Ex_c5074_9009245       | 79.3 | 0.0 | No  |
| 3B_1 | 67615408 | wsnp_Ku_rep_c73198_72796386 | 79.3 | 0.0 | No  |
| 3B_1 | 71767349 | wsnp_Ra_rep_c74606_72470419 | 79.3 | 1.4 | No  |
| 3B_1 | 59694507 | BS00011869_51               | 80.8 | 0.0 | Yes |
| 3B_1 | 69783490 | wsnp_Ku_c93664_84327484     | 80.8 | 1.4 | No  |
| 3B_1 | 26650310 | Excalibur_c11242_301        | 82.1 | 0.0 | Yes |
| 3B_1 | 59653470 | Kukri_c21818_519            | 82.1 | 0.0 | No  |
| 3B_1 | 68628353 | TA001464-0572               | 82.1 | 0.0 | No  |
| 3B_1 | 43665307 | wsnp_Ku_c21818_31604716     | 82.1 | 0.0 | No  |
| 3B_1 | 40695489 | wsnp_Ku_c4078_7436510       | 82.1 | 7.7 | No  |
| 3B_1 | 43604471 | BobWhite_c1196_297          | 89.9 | 0.0 | Yes |
| 3B_1 | 42654349 | BobWhite_c14606_452         | 89.9 | 0.0 | No  |
| 3B_1 | 73653397 | BobWhite_c42781_98          | 89.9 | 0.0 | No  |
| 3B_1 | 45709447 | BS00023645_51               | 89.9 | 0.0 | No  |
| 3B_1 | 48681316 | BS00033737_51               | 89.9 | 0.0 | No  |
| 3B_1 | 38669378 | BS00036352_51               | 89.9 | 0.0 | No  |
| 3B_1 | 13654321 | BS00037898_51               | 89.9 | 0.0 | No  |
| 3B_1 | 71781468 | BS00043730_51               | 89.9 | 0.0 | No  |
| 3B_1 | 41620326 | BS00045330_51               | 89.9 | 0.0 | No  |
| 3B_1 | 38714467 | BS00053566_51               | 89.9 | 0.0 | No  |
| 3B_1 | 59648339 | BS00053568_51               | 89.9 | 0.0 | No  |
| 3B_1 | 44754307 | BS00073825_51               | 89.9 | 0.0 | No  |
| 3B_1 | 32649505 | BS00074997_51               | 89.9 | 0.0 | No  |
| 3B_1 | 66662462 | Excalibur_c14999_712        | 89.9 | 0.0 | No  |
| 3B_1 | 11666389 | Excalibur_c16842_743        | 89.9 | 0.0 | No  |
| 3B_1 | 39786325 | Excalibur_c29625_222        | 89.9 | 0.0 | No  |
| 3B_1 | 25787318 | Excalibur_c29625_243        | 89.9 | 0.0 | No  |
| 3B_1 | 50640488 | Excalibur_c33550_75         | 89.9 | 0.0 | No  |

|      |          |                           |      |     |     |
|------|----------|---------------------------|------|-----|-----|
| 3B_1 | 56771491 | Excalibur_c46052_695      | 89.9 | 0.0 | No  |
| 3B_1 | 32612320 | Excalibur_c77101_90       | 89.9 | 0.0 | No  |
| 3B_1 | 34668494 | Excalibur_rep_c100805_157 | 89.9 | 0.0 | No  |
| 3B_1 | 39721498 | Excalibur_rep_c111297_98  | 89.9 | 0.0 | No  |
| 3B_1 | 51771437 | GENE-1966_110             | 89.9 | 0.0 | No  |
| 3B_1 | 26667475 | IAAV4105                  | 89.9 | 0.0 | No  |
| 3B_1 | 26734435 | IACX11401                 | 89.9 | 0.0 | No  |
| 3B_1 | 21712316 | Kukri_rep_c70198_1436     | 89.9 | 0.0 | No  |
| 3B_1 | 62785364 | Kukri_rep_c73303_688      | 89.9 | 0.0 | No  |
| 3B_1 | 20743508 | RAC875_c10203_2620        | 89.9 | 0.0 | No  |
| 3B_1 | 53605332 | RAC875_c19030_112         | 89.9 | 0.0 | No  |
| 3B_1 | 55627426 | RAC875_c46237_294         | 89.9 | 0.0 | No  |
| 3B_1 | 40790387 | RAC875_c8081_435          | 89.9 | 0.0 | No  |
| 3B_1 | 70717385 | RAC875_rep_c82061_78      | 89.9 | 0.0 | No  |
| 3B_1 | 49654324 | RAC875_rep_c83245_239     | 89.9 | 0.0 | No  |
| 3B_1 | 35720454 | RFL_Contig1945_110        | 89.9 | 0.0 | No  |
| 3B_1 | 16806305 | RFL_Contig5758_757        | 89.9 | 0.0 | No  |
| 3B_1 | 52748430 | RFL_Contig622_1601        | 89.9 | 0.0 | No  |
| 3B_1 | 10664434 | RFL_Contig622_381         | 89.9 | 0.0 | No  |
| 3B_1 | 65711504 | RFL_Contig873_566         | 89.9 | 0.0 | No  |
| 3B_1 | 50644328 | TA002241-1114             | 89.9 | 0.0 | No  |
| 3B_1 | 42734420 | TA002954-0682             | 89.9 | 0.0 | No  |
| 3B_1 | 45753391 | Tdurum_contig12540_72     | 89.9 | 0.0 | No  |
| 3B_1 | 11775445 | Tdurum_contig12941_1413   | 89.9 | 0.0 | No  |
| 3B_1 | 68727418 | Tdurum_contig31586_197    | 89.9 | 0.0 | No  |
| 3B_1 | 14749497 | Tdurum_contig42234_4440   | 89.9 | 0.0 | No  |
| 3B_1 | 15805318 | Tdurum_contig42234_6222   | 89.9 | 0.0 | No  |
| 3B_1 | 27655447 | Tdurum_contig54463_316    | 89.9 | 0.0 | No  |
| 3B_1 | 44761437 | Tdurum_contig75784_771    | 89.9 | 0.0 | No  |
| 3B_1 | 12769382 | wsnp_BG263758B_Ta_2_1     | 89.9 | 0.0 | No  |
| 3B_1 | 41781441 | wsnp_Ex_c3227_5948436     | 89.9 | 0.0 | No  |
| 3B_1 | 50735310 | wsnp_Ex_c5378_9505533     | 89.9 | 0.0 | No  |
| 3B_1 | 29605316 | wsnp_Ex_c5457_9631220     | 89.9 | 0.0 | No  |
| 3B_1 | 13673417 | wsnp_Ex_c5457_9632050     | 89.9 | 0.0 | No  |
| 3B_1 | 54788469 | wsnp_JD_c1316_1891903     | 89.9 | 0.0 | No  |
| 3B_1 | 13725473 | wsnp_JD_c1816_2522844     | 89.9 | 0.0 | No  |
| 3B_1 | 21706316 | wsnp_Ra_c10203_16850924   | 89.9 | 0.0 | No  |
| 3B_1 | 60648457 | wsnp_Ra_c38981_46788555   | 89.9 | 0.2 | No  |
| 3B_1 | wPt-6047 | wPt-6047                  | 90.0 | 0.4 | Yes |
| 3B_1 | 56778330 | Tdurum_contig75688_884    | 90.4 | 2.1 | Yes |
| 3B_1 | 42665484 | BobWhite_c5968_868        | 92.5 | 0.0 | Yes |
| 3B_1 | 40792376 | Kukri_c4074_463           | 92.5 | 2.6 | No  |
| 3B_1 | 26614475 | BobWhite_rep_c50834_145   | 95.0 | 0.0 | Yes |
| 3B_1 | 67678509 | BS00022741_51             | 95.0 | 0.0 | No  |

|      |          |                         |       |     |     |
|------|----------|-------------------------|-------|-----|-----|
| 3B_1 | 45709413 | BS00075108_51           | 95.0  | 0.0 | No  |
| 3B_1 | 36768505 | Excalibur_c21372_142    | 95.0  | 0.0 | No  |
| 3B_1 | 48682313 | Excalibur_c2492_1750    | 95.0  | 0.0 | No  |
| 3B_1 | 26791370 | Excalibur_c52783_67     | 95.0  | 0.0 | No  |
| 3B_1 | 38617328 | Kukri_c10511_94         | 95.0  | 0.0 | No  |
| 3B_1 | 60619390 | Kukri_c32046_493        | 95.0  | 0.0 | No  |
| 3B_1 | 33735456 | Kukri_c48750_1372       | 95.0  | 0.0 | No  |
| 3B_1 | 22747370 | Kukri_c48750_1416       | 95.0  | 0.0 | No  |
| 3B_1 | 35611319 | RAC875_c35355_777       | 95.0  | 0.0 | No  |
| 3B_1 | 11770473 | Tdurum_contig51993_52   | 95.0  | 0.0 | No  |
| 3B_1 | 11781345 | wsnp_Ex_c44447_50496676 | 95.0  | 0.0 | No  |
| 3B_1 | 18719502 | wsnp_Ku_c13069_20938717 | 95.0  | 0.0 | No  |
| 3B_1 | 14785414 | Tdurum_contig81690_353  | 95.0  | 0.7 | Yes |
| 3B_1 | 27670387 | Excalibur_c36626_228    | 95.8  | 0.0 | Yes |
| 3B_1 | 27717440 | RAC875_c49822_111       | 95.8  | 4.9 | No  |
| 3B_1 | wPt-8140 | wPt-8140                | 100.7 | 7.4 | Yes |
| 3B_1 | wPt-8686 | wPt-8686                | 108.0 | 0.0 | Yes |
| 3B_1 | wPt-1349 | wPt-1349                | 108.0 | 0.3 | No  |
| 3B_1 | 25773506 | BobWhite_c12360_401     | 108.4 | 0.0 | Yes |
| 3B_1 | 33780472 | BobWhite_c2957_369      | 108.4 | 0.0 | No  |
| 3B_1 | 38669350 | BS00022242_51           | 108.4 | 0.0 | No  |
| 3B_1 | 21733356 | D_contig23666_332       | 108.4 | 0.0 | No  |
| 3B_1 | 60639446 | Excalibur_c25515_95     | 108.4 | 0.0 | No  |
| 3B_1 | 47660493 | Excalibur_c47078_1842   | 108.4 | 0.0 | No  |
| 3B_1 | 31606460 | Excalibur_c47078_1918   | 108.4 | 0.0 | No  |
| 3B_1 | 74635484 | Excalibur_c48030_405    | 108.4 | 0.0 | No  |
| 3B_1 | 14795307 | Ku_c17747_568           | 108.4 | 0.0 | No  |
| 3B_1 | 26775420 | Ku_c1976_663            | 108.4 | 0.0 | No  |
| 3B_1 | 44793413 | Kukri_c17063_548        | 108.4 | 0.0 | No  |
| 3B_1 | 38762492 | Kukri_c24606_98         | 108.4 | 0.0 | No  |
| 3B_1 | 16729497 | Kukri_c27565_61         | 108.4 | 0.0 | No  |
| 3B_1 | 29654465 | Kukri_c50943_853        | 108.4 | 0.0 | No  |
| 3B_1 | 60669313 | Kukri_c54561_272        | 108.4 | 0.0 | No  |
| 3B_1 | 47781326 | Ra_c21068_1260          | 108.4 | 0.0 | No  |
| 3B_1 | 69754371 | Tdurum_contig28784_225  | 108.4 | 0.0 | No  |
| 3B_1 | 35697446 | Tdurum_contig31379_183  | 108.4 | 0.0 | No  |
| 3B_1 | 42749374 | Tdurum_contig31498_210  | 108.4 | 0.0 | No  |
| 3B_1 | 62808477 | Tdurum_contig41261_243  | 108.4 | 0.0 | No  |
| 3B_1 | 26644338 | Tdurum_contig42485_1862 | 108.4 | 0.0 | No  |
| 3B_1 | 35731457 | Tdurum_contig4951_694   | 108.4 | 0.0 | No  |
| 3B_1 | 65639333 | Tdurum_contig60949_306  | 108.4 | 0.0 | No  |
| 3B_1 | 65758417 | Tdurum_contig64530_267  | 108.4 | 0.0 | No  |
| 3B_1 | 37686421 | Tdurum_contig97412_270  | 108.4 | 0.0 | No  |
| 3B_1 | 26726464 | Tdurum_contig97412_402  | 108.4 | 0.0 | No  |

|      |                          |                          |       |     |     |
|------|--------------------------|--------------------------|-------|-----|-----|
| 3B_1 | 50731434                 | wsnp_Ex_c47078_52393295  | 108.4 | 0.0 | No  |
| 3B_1 | 38727390                 | Excalibur_c42314_1152    | 108.4 | 0.2 | Yes |
| 3B_1 | <a href="#">wPt-8592</a> | <a href="#">wPt-8592</a> | 108.6 | 0.1 | Yes |
| 3B_1 | <a href="#">wPt-6239</a> | <a href="#">wPt-6239</a> | 108.7 | 0.3 | Yes |
| 3B_1 | 53665310                 | BS00065927_51            | 108.9 | 0.0 | Yes |
| 3B_1 | 64711311                 | BS00067499_51            | 108.9 | 0.0 | No  |
| 3B_1 | 64715393                 | D_F5XZDLF02HWOJZ_227     | 108.9 | 0.0 | No  |
| 3B_1 | 67789368                 | Excalibur_c8284_580      | 108.9 | 0.0 | No  |
| 3B_1 | 27624465                 | Ku_c14750_566            | 108.9 | 0.0 | No  |
| 3B_1 | 12680507                 | Kukri_c14140_347         | 108.9 | 0.0 | No  |
| 3B_1 | 66636417                 | Kukri_c46948_558         | 108.9 | 0.0 | No  |
| 3B_1 | 34765506                 | Kukri_c73725_218         | 108.9 | 0.0 | No  |
| 3B_1 | 62627503                 | RAC875_rep_c110663_1499  | 108.9 | 0.0 | No  |
| 3B_1 | 65666338                 | RAC875_rep_c111648_86    | 108.9 | 0.0 | No  |
| 3B_1 | 65668370                 | Tdurum_contig19977_210   | 108.9 | 2.1 | No  |
| 3B_1 | 55723469                 | TA002541-0818            | 111.0 | 5.7 | Yes |
| 3B_1 | <a href="#">wPt-6802</a> | <a href="#">wPt-6802</a> | 116.7 |     | Yes |
| 3B_2 | <a href="#">wPt-7225</a> | <a href="#">wPt-7225</a> | 0.0   | 0.2 | Yes |
| 3B_2 | <a href="#">wPt-7264</a> | <a href="#">wPt-7264</a> | 0.2   | 0.4 | Yes |
| 3B_2 | 74750498                 | BS00042999_51            | 0.6   | 0.0 | Yes |
| 3B_2 | 64604478                 | BS00045156_51            | 0.6   | 0.0 | No  |
| 3B_2 | 45710464                 | BS00075934_51            | 0.6   | 0.0 | No  |
| 3B_2 | 51632351                 | Kukri_c17082_378         | 0.6   | 0.0 | No  |
| 3B_2 | 47677424                 | RAC875_c46415_638        | 0.6   | 0.0 | No  |
| 3B_2 | 66738435                 | RAC875_c4907_474         | 0.6   | 0.0 | No  |
| 3B_2 | 43771312                 | RFL_Contig3626_521       | 0.6   | 0.0 | No  |
| 3B_2 | 15790431                 | Tdurum_contig44344_346   | 0.6   | 0.0 | No  |
| 3B_2 | 14771468                 | Tdurum_contig46443_1505  | 0.6   | 0.0 | No  |
| 3B_2 | 23777327                 | Tdurum_contig6356_150    | 0.6   | 0.0 | No  |
| 3B_2 | 66626488                 | Tdurum_contig7623_392    | 0.6   | 0.0 | No  |
| 3B_2 | 37629351                 | wsnp_JD_c5170_6293946    | 0.6   | 1.2 | No  |
| 3B_2 | 32724480                 | RAC875_c4954_331         | 1.8   | 0.0 | Yes |
| 3B_2 | 66613420                 | GENE-3869_603            | 1.8   | 0.3 | Yes |
| 3B_2 | <a href="#">wPt-7984</a> | <a href="#">wPt-7984</a> | 2.0   | 0.0 | Yes |
| 3B_2 | <a href="#">wPt-3921</a> | <a href="#">wPt-3921</a> | 2.1   | 0.1 | Yes |
| 3B_2 | 21783371                 | BobWhite_c4864_326       | 2.2   | 0.0 | Yes |
| 3B_2 | 31718370                 | BobWhite_c54480_387      | 2.2   | 0.0 | No  |
| 3B_2 | 51752448                 | BobWhite_c6016_715       | 2.2   | 0.0 | No  |
| 3B_2 | 31621367                 | BobWhite_c6016_805       | 2.2   | 0.0 | No  |
| 3B_2 | 10709425                 | BS00001335_51            | 2.2   | 0.0 | No  |
| 3B_2 | 34615359                 | BS00004358_51            | 2.2   | 0.0 | No  |
| 3B_2 | 51674415                 | BS00011532_51            | 2.2   | 0.0 | No  |
| 3B_2 | 36705476                 | BS00022229_51            | 2.2   | 0.0 | No  |
| 3B_2 | 17810459                 | BS00022669_51            | 2.2   | 0.0 | No  |

|      |          |                           |     |     |    |
|------|----------|---------------------------|-----|-----|----|
| 3B_2 | 27662483 | BS00025838_51             | 2.2 | 0.0 | No |
| 3B_2 | 56633467 | BS00036089_51             | 2.2 | 0.0 | No |
| 3B_2 | 35784471 | BS00058654_51             | 2.2 | 0.0 | No |
| 3B_2 | 47756461 | BS00058860_51             | 2.2 | 0.0 | No |
| 3B_2 | 60695433 | BS00058861_51             | 2.2 | 0.0 | No |
| 3B_2 | 72646491 | BS00062676_51             | 2.2 | 0.0 | No |
| 3B_2 | 10767448 | BS00062677_51             | 2.2 | 0.0 | No |
| 3B_2 | 57719332 | BS00063443_51             | 2.2 | 0.0 | No |
| 3B_2 | 72658500 | BS00063445_51             | 2.2 | 0.0 | No |
| 3B_2 | 60760412 | BS00064776_51             | 2.2 | 0.0 | No |
| 3B_2 | 44708434 | BS00066754_51             | 2.2 | 0.0 | No |
| 3B_2 | 18635340 | BS00067275_51             | 2.2 | 0.0 | No |
| 3B_2 | 44680390 | BS00073658_51             | 2.2 | 0.0 | No |
| 3B_2 | 51628437 | BS00077449_51             | 2.2 | 0.0 | No |
| 3B_2 | 42678411 | BS00077909_51             | 2.2 | 0.0 | No |
| 3B_2 | 31646459 | BS00083706_51             | 2.2 | 0.0 | No |
| 3B_2 | 69601414 | BS00089530_51             | 2.2 | 0.0 | No |
| 3B_2 | 15675407 | BS00095247_51             | 2.2 | 0.0 | No |
| 3B_2 | 17667413 | BS00095248_51             | 2.2 | 0.0 | No |
| 3B_2 | 40685306 | BS00098161_51             | 2.2 | 0.0 | No |
| 3B_2 | 15606501 | BS00098759_51             | 2.2 | 0.0 | No |
| 3B_2 | 19601461 | BS00098760_51             | 2.2 | 0.0 | No |
| 3B_2 | 51724486 | BS00100706_51             | 2.2 | 0.0 | No |
| 3B_2 | 54732371 | BS00102648_51             | 2.2 | 0.0 | No |
| 3B_2 | 30756462 | Excalibur_c10014_307      | 2.2 | 0.0 | No |
| 3B_2 | 54726327 | Excalibur_c17599_988      | 2.2 | 0.0 | No |
| 3B_2 | 53778444 | Excalibur_c19743_1714     | 2.2 | 0.0 | No |
| 3B_2 | 47769497 | Excalibur_c3031_59        | 2.2 | 0.0 | No |
| 3B_2 | 54667345 | Excalibur_c30368_56       | 2.2 | 0.0 | No |
| 3B_2 | 19736439 | Excalibur_c31384_461      | 2.2 | 0.0 | No |
| 3B_2 | 16762457 | Excalibur_c35170_1610     | 2.2 | 0.0 | No |
| 3B_2 | 33714324 | Excalibur_c39985_68       | 2.2 | 0.0 | No |
| 3B_2 | 24734366 | Excalibur_c45695_253      | 2.2 | 0.0 | No |
| 3B_2 | 53746316 | Excalibur_c9430_1166      | 2.2 | 0.0 | No |
| 3B_2 | 34721433 | Excalibur_rep_c102055_320 | 2.2 | 0.0 | No |
| 3B_2 | 59686341 | Excalibur_rep_c66331_1967 | 2.2 | 0.0 | No |
| 3B_2 | 38625425 | Excalibur_rep_c71060_78   | 2.2 | 0.0 | No |
| 3B_2 | 13629417 | GENE-3869_1166            | 2.2 | 0.0 | No |
| 3B_2 | 12807314 | IAAV4876                  | 2.2 | 0.0 | No |
| 3B_2 | 25702478 | Kukri_c12817_59           | 2.2 | 0.0 | No |
| 3B_2 | 46707459 | Kukri_c15654_309          | 2.2 | 0.0 | No |
| 3B_2 | 67648366 | Kukri_c3540_931           | 2.2 | 0.0 | No |
| 3B_2 | 44749415 | Kukri_c64588_229          | 2.2 | 0.0 | No |
| 3B_2 | 65708494 | Kukri_rep_c69663_846      | 2.2 | 0.0 | No |



|      |          |                         |     |     |    |
|------|----------|-------------------------|-----|-----|----|
| 3B_2 | 20775503 | RAC875_c101155_64       | 2.2 | 0.0 | No |
| 3B_2 | 61796373 | RAC875_c11409_550       | 2.2 | 0.0 | No |
| 3B_2 | 45649507 | RAC875_c14696_980       | 2.2 | 0.0 | No |
| 3B_2 | 38677330 | RAC875_c21604_1625      | 2.2 | 0.0 | No |
| 3B_2 | 22729492 | RAC875_c26767_158       | 2.2 | 0.0 | No |
| 3B_2 | 58664480 | RAC875_c3956_275        | 2.2 | 0.0 | No |
| 3B_2 | 40781407 | RAC875_c3956_659        | 2.2 | 0.0 | No |
| 3B_2 | 14706313 | RAC875_c4954_1419       | 2.2 | 0.0 | No |
| 3B_2 | 48621416 | RAC875_c4954_943        | 2.2 | 0.0 | No |
| 3B_2 | 19736335 | RAC875_c62483_112       | 2.2 | 0.0 | No |
| 3B_2 | 26804461 | RAC875_c98721_85        | 2.2 | 0.0 | No |
| 3B_2 | 69748352 | RAC875_rep_c118986_60   | 2.2 | 0.0 | No |
| 3B_2 | 54721312 | RAC875_rep_c69171_241   | 2.2 | 0.0 | No |
| 3B_2 | 46707381 | RAC875_rep_c69820_148   | 2.2 | 0.0 | No |
| 3B_2 | 13651400 | RFL_Contig1801_429      | 2.2 | 0.0 | No |
| 3B_2 | 18624509 | RFL_Contig3008_1370     | 2.2 | 0.0 | No |
| 3B_2 | 45627362 | RFL_Contig4531_1195     | 2.2 | 0.0 | No |
| 3B_2 | 70670413 | TA003763-0481           | 2.2 | 0.0 | No |
| 3B_2 | 28693395 | Tdurum_contig10352_373  | 2.2 | 0.0 | No |
| 3B_2 | 29629509 | Tdurum_contig11192_373  | 2.2 | 0.0 | No |
| 3B_2 | 65630463 | Tdurum_contig17943_547  | 2.2 | 0.0 | No |
| 3B_2 | 30773347 | Tdurum_contig25619_350  | 2.2 | 0.0 | No |
| 3B_2 | 70676347 | Tdurum_contig25619_416  | 2.2 | 0.0 | No |
| 3B_2 | 32678320 | Tdurum_contig34149_219  | 2.2 | 0.0 | No |
| 3B_2 | 54613468 | Tdurum_contig35799_208  | 2.2 | 0.0 | No |
| 3B_2 | 28788403 | Tdurum_contig47506_251  | 2.2 | 0.0 | No |
| 3B_2 | 30601358 | Tdurum_contig47506_269  | 2.2 | 0.0 | No |
| 3B_2 | 73715350 | Tdurum_contig47506_495  | 2.2 | 0.0 | No |
| 3B_2 | 57659505 | Tdurum_contig49804_392  | 2.2 | 0.0 | No |
| 3B_2 | 44612321 | Tdurum_contig50954_1095 | 2.2 | 0.0 | No |
| 3B_2 | 58644504 | Tdurum_contig50954_1264 | 2.2 | 0.0 | No |
| 3B_2 | 29764357 | Tdurum_contig50954_1393 | 2.2 | 0.0 | No |
| 3B_2 | 47685498 | Tdurum_contig50954_394  | 2.2 | 0.0 | No |
| 3B_2 | 46641410 | Tdurum_contig50954_475  | 2.2 | 0.0 | No |
| 3B_2 | 39620399 | Tdurum_contig50954_880  | 2.2 | 0.0 | No |
| 3B_2 | 10739474 | Tdurum_contig77551_586  | 2.2 | 0.0 | No |
| 3B_2 | 18677340 | Tdurum_contig77551_589  | 2.2 | 0.0 | No |
| 3B_2 | 45642359 | Tdurum_contig84762_189  | 2.2 | 0.0 | No |
| 3B_2 | 71709440 | Tdurum_contig84762_258  | 2.2 | 0.0 | No |
| 3B_2 | 34625324 | Tdurum_contig93830_1688 | 2.2 | 0.0 | No |
| 3B_2 | 53698357 | tplb0028p23_691         | 2.2 | 0.0 | No |
| 3B_2 | 62649451 | tplb0028p23_852         | 2.2 | 0.0 | No |
| 3B_2 | 64732379 | tplb0050o09_895         | 2.2 | 0.0 | No |
| 3B_2 | 57760367 | wsnp_BE446462D_Ta_2_3   | 2.2 | 0.0 | No |

|      |          |                              |     |     |     |
|------|----------|------------------------------|-----|-----|-----|
| 3B_2 | 31600353 | wsnp_Ex_c12875_20407926      | 2.2 | 0.0 | No  |
| 3B_2 | 27743453 | wsnp_Ex_c30368_39293103      | 2.2 | 0.0 | No  |
| 3B_2 | 26701502 | wsnp_Ex_c8360_14085858       | 2.2 | 0.0 | No  |
| 3B_2 | 61644412 | wsnp_Ex_rep_c66331_64502363  | 2.2 | 0.0 | No  |
| 3B_2 | 36729365 | wsnp_Ex_rep_c66331_64502558  | 2.2 | 0.0 | No  |
| 3B_2 | 47736395 | wsnp_Ex_rep_c66331_64503065  | 2.2 | 0.0 | No  |
| 3B_2 | 23725426 | wsnp_Ku_c12698_20441325      | 2.2 | 0.0 | No  |
| 3B_2 | 44645343 | wsnp_Ku_c1629_3206989        | 2.2 | 0.0 | No  |
| 3B_2 | 24798457 | wsnp_Ra_c41135_48426638      | 2.2 | 0.1 | No  |
| 3B_2 | wPt-9303 | wPt-9303                     | 2.2 | 0.0 | Yes |
| 3B_2 | wPt-8079 | wPt-8079                     | 2.2 | 0.0 | Yes |
| 3B_2 | tPt-1079 | tPt-1079                     | 2.2 | 0.0 | Yes |
| 3B_2 | wPt-1516 | wPt-1516                     | 2.3 | 1.0 | Yes |
| 3B_2 | 53697477 | Tdurum_contig7623_695        | 3.3 | 1.4 | Yes |
| 3B_2 | 20652373 | BobWhite_c3902_175           | 4.6 | 0.0 | Yes |
| 3B_2 | 58755453 | Ra_c17608_960                | 4.6 | 0.0 | No  |
| 3B_2 | 13715410 | Tdurum_contig61004_483       | 4.6 | 0.0 | No  |
| 3B_2 | 35681368 | Tdurum_contig94629_258       | 4.6 | 0.0 | No  |
| 3B_2 | 11711371 | tplb0059m03_1516             | 4.6 | 1.5 | No  |
| 3B_2 | 37744464 | BobWhite_c22126_94           | 6.2 | 0.0 | Yes |
| 3B_2 | 60741489 | BobWhite_c4249_174           | 6.2 | 0.0 | No  |
| 3B_2 | 53765342 | BS00022154_51                | 6.2 | 0.0 | No  |
| 3B_2 | 63760430 | CAP11_c2057_200              | 6.2 | 0.0 | No  |
| 3B_2 | 21787380 | CAP7_c1997_79                | 6.2 | 0.0 | No  |
| 3B_2 | 56642444 | Excalibur_c25195_1047        | 6.2 | 0.0 | No  |
| 3B_2 | 30655407 | Excalibur_c8314_405          | 6.2 | 0.0 | No  |
| 3B_2 | 66762490 | Excalibur_c8386_1009         | 6.2 | 0.0 | No  |
| 3B_2 | 40600481 | Tdurum_contig10608_948       | 6.2 | 0.0 | No  |
| 3B_2 | 54685400 | wsnp_Ex_c8386_14127329       | 6.2 | 0.0 | No  |
| 3B_2 | 43766401 | wsnp_Ex_c8386_14128029       | 6.2 | 0.0 | No  |
| 3B_2 | 42674480 | wsnp_Ex_rep_c103892_88739043 | 6.2 | 0.0 | No  |
| 3B_2 | 48780439 | wsnp_Ku_c55746_59522526      | 6.2 | 0.0 | No  |
| 3B_2 | 69615301 | wsnp_Ku_c6602_11531957       | 6.2 | 1.5 | No  |
| 3B_2 | 34645487 | BobWhite_c609_1239           | 7.7 | 0.0 | Yes |
| 3B_2 | 50718469 | BobWhite_c609_414            | 7.7 | 0.0 | No  |
| 3B_2 | 13638330 | BobWhite_c609_453            | 7.7 | 0.0 | No  |
| 3B_2 | 60750419 | BS00009393_51                | 7.7 | 0.0 | No  |
| 3B_2 | 72797386 | BS00017635_51                | 7.7 | 0.0 | No  |
| 3B_2 | 34645456 | BS00033209_51                | 7.7 | 0.0 | No  |
| 3B_2 | 70789468 | BS00065556_51                | 7.7 | 0.0 | No  |
| 3B_2 | 30644355 | BS00110822_51                | 7.7 | 0.0 | No  |
| 3B_2 | 66727311 | CAP11_c527_306               | 7.7 | 0.0 | No  |
| 3B_2 | 53701359 | CAP7_c1576_371               | 7.7 | 0.0 | No  |
| 3B_2 | 58794492 | CAP7_c455_467                | 7.7 | 0.0 | No  |

|      |          |                             |      |      |     |
|------|----------|-----------------------------|------|------|-----|
| 3B_2 | 37803328 | CAP8_rep_c3727_108          | 7.7  | 0.0  | No  |
| 3B_2 | 54733504 | Excalibur_rep_c104237_78    | 7.7  | 0.0  | No  |
| 3B_2 | 22769498 | GENE-1851_76                | 7.7  | 0.0  | No  |
| 3B_2 | 71612497 | IAAV4561                    | 7.7  | 0.0  | No  |
| 3B_2 | 20669431 | JD_c23336_253               | 7.7  | 0.0  | No  |
| 3B_2 | 22799338 | Ku_c23419_358               | 7.7  | 0.0  | No  |
| 3B_2 | 60622329 | Ku_c519_281                 | 7.7  | 0.0  | No  |
| 3B_2 | 71673428 | Kukri_rep_c96809_1043       | 7.7  | 0.0  | No  |
| 3B_2 | 55616354 | Kukri_rep_c96809_457        | 7.7  | 0.0  | No  |
| 3B_2 | 59790383 | RAC875_c16609_1134          | 7.7  | 0.0  | No  |
| 3B_2 | 38699494 | RAC875_c787_671             | 7.7  | 0.0  | No  |
| 3B_2 | 22681428 | RAC875_rep_c96490_105       | 7.7  | 0.0  | No  |
| 3B_2 | 20648426 | RFL_Contig2585_1174         | 7.7  | 0.0  | No  |
| 3B_2 | 53600346 | RFL_Contig2585_1280         | 7.7  | 0.0  | No  |
| 3B_2 | 27635467 | RFL_Contig2585_547          | 7.7  | 0.0  | No  |
| 3B_2 | 10700401 | RFL_Contig5709_3446         | 7.7  | 0.0  | No  |
| 3B_2 | 29729382 | Tdurum_contig11115_99       | 7.7  | 0.0  | No  |
| 3B_2 | 37760402 | Tdurum_contig31294_108      | 7.7  | 0.0  | No  |
| 3B_2 | 74715311 | Tdurum_contig402_129        | 7.7  | 0.0  | No  |
| 3B_2 | 21770418 | Tdurum_contig43378_256      | 7.7  | 0.0  | No  |
| 3B_2 | 36769451 | Tdurum_contig75400_998      | 7.7  | 0.0  | No  |
| 3B_2 | 53787309 | Tdurum_contig79629_538      | 7.7  | 0.0  | No  |
| 3B_2 | 57709499 | Tdurum_contig80344_144      | 7.7  | 0.0  | No  |
| 3B_2 | 23704496 | tplb0043c20_1046            | 7.7  | 0.0  | No  |
| 3B_2 | 69808362 | wsnp_CAP11_c3742_1796552    | 7.7  | 0.0  | No  |
| 3B_2 | 71796402 | wsnp_Ex_c22154_31342077     | 7.7  | 0.0  | No  |
| 3B_2 | 12656357 | wsnp_Ex_c23633_32868822     | 7.7  | 0.0  | No  |
| 3B_2 | 53784457 | wsnp_Ex_rep_c67033_65490126 | 7.7  | 0.0  | No  |
| 3B_2 | 39649391 | wsnp_JD_c222_352320         | 7.7  | 10.6 | No  |
| 3B_2 | 36613362 | GENE-1856_756               | 18.3 | 0.8  | Yes |
| 3B_2 | 48669407 | BS00064956_51               | 19.1 | 0.0  | Yes |
| 3B_2 | 39725491 | BS00088683_51               | 19.1 | 0.0  | No  |
| 3B_2 | 45754492 | BS00088684_51               | 19.1 | 0.0  | No  |
| 3B_2 | 13753381 | Excalibur_c9206_671         | 19.1 | 0.0  | No  |
| 3B_2 | 49698455 | IAAV4792                    | 19.1 | 0.0  | No  |
| 3B_2 | 39656434 | IAAV6442                    | 19.1 | 0.0  | No  |
| 3B_2 | 38611394 | Ku_c663_1896                | 19.1 | 0.0  | No  |
| 3B_2 | 10678368 | tplb0041e10_1230            | 19.1 | 0.0  | No  |
| 3B_2 | 66652487 | wsnp_Ex_c3005_5548573       | 19.1 |      | No  |
| 4A   | 18783508 | BobWhite_c23619_138         | 0.0  | 0.0  | Yes |
| 4A   | 39618399 | Excalibur_c39621_358        | 0.0  | 0.0  | No  |
| 4A   | 50624434 | Kukri_c2005_1312            | 0.0  | 0.0  | No  |
| 4A   | 55687434 | Kukri_c27901_685            | 0.0  | 0.0  | No  |
| 4A   | 61702346 | Kukri_c8815_531             | 0.0  | 0.0  | No  |

|    |          |                              |      |      |     |
|----|----------|------------------------------|------|------|-----|
| 4A | 42712504 | Kukri_c8815_619              | 0.0  | 0.0  | No  |
| 4A | 62667392 | Kukri_rep_c79597_513         | 0.0  | 0.0  | No  |
| 4A | 12789398 | TA001195-0515                | 0.0  | 3.8  | No  |
| 4A | 42635500 | BobWhite_c31621_148          | 3.8  | 0.0  | Yes |
| 4A | 27730364 | Excalibur_c10390_104         | 3.8  | 0.0  | No  |
| 4A | 16637480 | GENE-2570_298                | 3.8  | 0.0  | No  |
| 4A | 17773339 | GENE-2875_113                | 3.8  | 0.0  | No  |
| 4A | 56619347 | Ra_c108749_837               | 3.8  | 0.0  | No  |
| 4A | 23624395 | RAC875_c7325_407             | 3.8  | 0.0  | No  |
| 4A | 15764428 | Tdurum_contig13606_928       | 3.8  | 0.0  | No  |
| 4A | 45775410 | wsnp_Ex_c10390_17007929      | 3.8  | 0.0  | No  |
| 4A | 37606329 | wsnp_Ex_c4220_7623030        | 3.8  | 0.0  | No  |
| 4A | 61649321 | wsnp_Ex_rep_c66426_64644630  | 3.8  | 0.0  | No  |
| 4A | 61649429 | wsnp_Ex_rep_c66426_64645835  | 3.8  | 0.0  | No  |
| 4A | 31764451 | wsnp_Ku_c2114_4088504        | 3.8  | 0.0  | No  |
| 4A | 57743342 | wsnp_Ku_c49919_55679171      | 3.8  | 0.0  | No  |
| 4A | 18802418 | wsnp_Ku_rep_c102728_89637829 | 3.8  | 15.5 | No  |
| 4A | 11655504 | BobWhite_c4083_743           | 19.3 | 0.0  | Yes |
| 4A | 47735312 | BS00021752_51                | 19.3 | 0.0  | No  |
| 4A | 32732371 | BS00036493_51                | 19.3 | 0.0  | No  |
| 4A | 29623352 | Ex_c883_2618                 | 19.3 | 0.0  | No  |
| 4A | 40609445 | IAAV855                      | 19.3 | 0.0  | No  |
| 4A | 28685340 | Ku_c22706_1527               | 19.3 | 0.0  | No  |
| 4A | 61631458 | Kukri_c53787_620             | 19.3 | 0.0  | No  |
| 4A | 40804370 | Kukri_rep_c111543_206        | 19.3 | 0.0  | No  |
| 4A | 30810434 | RAC875_c1377_428             | 19.3 | 0.0  | No  |
| 4A | 30712424 | Tdurum_contig8061_56         | 19.3 | 0.0  | No  |
| 4A | 62607490 | tplb0030n07_390              | 19.3 | 0.0  | No  |
| 4A | 69807405 | wsnp_Ex_c4752_8482625        | 19.3 | 2.8  | No  |
| 4A | 42658481 | BS00089283_51                | 22.1 | 0.0  | Yes |
| 4A | 56622390 | Excalibur_c40618_182         | 22.1 | 0.0  | No  |
| 4A | 13751461 | Tdurum_contig11919_360       | 22.1 | 0.0  | No  |
| 4A | 63772306 | Tdurum_contig33628_129       | 22.1 | 0.0  | No  |
| 4A | 15739480 | wsnp_CAP8_c1013_646748       | 22.1 | 6.8  | No  |
| 4A | 54678302 | D_contig08728_654            | 28.9 | 9.5  | Yes |
| 4A | 23603411 | IACX2890                     | 38.4 | 0.0  | Yes |
| 4A | 47793452 | RAC875_c21369_425            | 38.4 | 0.0  | No  |
| 4A | 52631327 | wsnp_Ex_c13031_20625900      | 38.4 | 0.0  | No  |
| 4A | 57663506 | wsnp_Ku_c4342_7887834        | 38.4 | 2.1  | No  |
| 4A | wPt-7355 | wPt-7355                     | 40.5 | 3.7  | Yes |
| 4A | wPt-4660 | wPt-4660                     | 44.2 | 0.5  | Yes |
| 4A | 62725494 | BobWhite_c12128_187          | 44.7 | 0.0  | Yes |
| 4A | 58611346 | BobWhite_c35402_66           | 44.7 | 0.0  | No  |
| 4A | 37615506 | Ex_c675_2554                 | 44.7 | 0.0  | No  |

|    |          |                           |      |      |     |
|----|----------|---------------------------|------|------|-----|
| 4A | 64793344 | Excalibur_c24511_1196     | 44.7 | 0.0  | No  |
| 4A | 35605505 | Excalibur_c46394_497      | 44.7 | 0.0  | No  |
| 4A | 21611357 | Excalibur_c46394_762      | 44.7 | 0.0  | No  |
| 4A | 66716344 | Excalibur_rep_c102323_379 | 44.7 | 0.0  | No  |
| 4A | 21792311 | Excalibur_rep_c107908_308 | 44.7 | 0.0  | No  |
| 4A | 63751452 | IAAV7104                  | 44.7 | 0.0  | No  |
| 4A | 32743435 | Ku_c46953_153             | 44.7 | 0.0  | No  |
| 4A | 24614312 | Ra_c22675_581             | 44.7 | 0.0  | No  |
| 4A | 17651381 | Ra_c23848_305             | 44.7 | 0.0  | No  |
| 4A | 49764498 | RAC875_c17918_321         | 44.7 | 0.0  | No  |
| 4A | 26806347 | RAC875_c19919_724         | 44.7 | 0.0  | No  |
| 4A | 17775300 | RFL_Contig3679_315        | 44.7 | 0.0  | No  |
| 4A | 13719353 | Tdurum_contig42257_4485   | 44.7 | 0.0  | No  |
| 4A | 14740499 | Tdurum_contig42526_1331   | 44.7 | 0.0  | No  |
| 4A | 13631417 | Tdurum_contig42526_994    | 44.7 | 0.0  | No  |
| 4A | 35628314 | Tdurum_contig47148_651    | 44.7 | 0.0  | No  |
| 4A | 46654375 | Tdurum_contig6030_377     | 44.7 | 0.0  | No  |
| 4A | 52656487 | Tdurum_contig97887_268    | 44.7 | 0.0  | No  |
| 4A | 37785467 | tplb0031m13_2255          | 44.7 | 0.0  | No  |
| 4A | 55740463 | wsnp_Ku_c2317_4448102     | 44.7 | 0.0  | No  |
| 4A | 68654366 | wsnp_Ku_c4924_8816643     | 44.7 | 1.5  | No  |
| 4A | 14793436 | BobWhite_c15406_510       | 46.2 | 0.0  | Yes |
| 4A | 24809459 | Excalibur_c30378_673      | 46.2 | 0.0  | No  |
| 4A | 31762425 | wsnp_Ex_c612_1213451      | 46.2 | 0.0  | No  |
| 4A | 20622446 | wsnp_JD_c38619_27992279   | 46.2 | 0.1  | No  |
| 4A | 38692401 | Excalibur_c16188_531      | 46.3 | 1.3  | Yes |
| 4A | 30748344 | Excalibur_c21964_237      | 47.6 | 1.5  | Yes |
| 4A | 28795326 | BS00108849_51             | 49.1 | 4.0  | Yes |
| 4A | 15670400 | BobWhite_c18287_502       | 53.1 | 0.0  | Yes |
| 4A | 65660463 | Ex_c57499_418             | 53.1 | 0.0  | No  |
| 4A | 33747404 | Excalibur_rep_c114451_411 | 53.1 | 0.0  | No  |
| 4A | 45759362 | Kukri_c6224_492           | 53.1 | 1.4  | No  |
| 4A | 28649342 | Tdurum_contig22511_355    | 54.5 | 1.2  | Yes |
| 4A | 38787407 | Excalibur_c76268_300      | 55.7 | 0.0  | Yes |
| 4A | 45672307 | Tdurum_contig47858_1217   | 55.7 | 0.0  | No  |
| 4A | 70788346 | Tdurum_contig47858_908    | 55.7 | 7.3  | No  |
| 4A | 28699459 | BobWhite_c22176_230       | 63.0 | 0.0  | Yes |
| 4A | 14715408 | BobWhite_c22176_295       | 63.0 | 1.1  | No  |
| 4A | 32709356 | Excalibur_c4325_1440      | 64.1 | 0.0  | Yes |
| 4A | 25655379 | Kukri_c96159_197          | 64.1 | 5.9  | No  |
| 4A | 36611322 | RAC875_c24341_146         | 70.1 | 20.3 | Yes |
| 4A | 13727499 | Kukri_rep_c96828_86       | 90.3 | 0.9  | Yes |
| 4A | 27622339 | D_GBB4FNX02F8WWU_105      | 91.3 | 0.9  | Yes |
| 4A | 74656326 | Excalibur_c23264_122      | 92.2 | 0.0  | Yes |

|    |                          |                          |       |     |     |
|----|--------------------------|--------------------------|-------|-----|-----|
| 4A | 38793372                 | Excalibur_c25471_225     | 92.2  | 0.0 | No  |
| 4A | 17614440                 | Excalibur_rep_c68955_422 | 92.2  | 0.0 | No  |
| 4A | 64690429                 | IAAV1383                 | 92.2  | 0.0 | No  |
| 4A | 55789432                 | IAAV9183                 | 92.2  | 0.0 | No  |
| 4A | 30604310                 | JD_c4812_228             | 92.2  | 0.0 | No  |
| 4A | 64692365                 | Ku_c20453_883            | 92.2  | 0.0 | No  |
| 4A | 71603321                 | Ku_c7810_274             | 92.2  | 0.0 | No  |
| 4A | 25765476                 | Kukri_c17417_134         | 92.2  | 0.0 | No  |
| 4A | 57810345                 | Kukri_c17417_407         | 92.2  | 0.0 | No  |
| 4A | 32640474                 | Kukri_c50675_126         | 92.2  | 0.0 | No  |
| 4A | 15608468                 | RAC875_c85046_124        | 92.2  | 0.0 | No  |
| 4A | 23710313                 | RAC875_rep_c103774_289   | 92.2  | 0.0 | No  |
| 4A | 41801410                 | Tdurum_contig10064_204   | 92.2  | 0.0 | No  |
| 4A | 49791458                 | Tdurum_contig16541_78    | 92.2  | 1.4 | No  |
| 4A | 69686409                 | D_GBF1XID01EMISV_148     | 93.6  | 0.0 | Yes |
| 4A | 40674367                 | RAC875_c7734_411         | 93.6  | 1.6 | No  |
| 4A | <a href="#">wPt-3766</a> | <a href="#">wPt-3766</a> | 95.2  | 0.2 | Yes |
| 4A | <a href="#">wPt-6214</a> | <a href="#">wPt-6214</a> | 95.4  | 0.0 | Yes |
| 4A | <a href="#">wPt-0105</a> | <a href="#">wPt-0105</a> | 95.4  | 0.0 | No  |
| 4A | <a href="#">wPt-9833</a> | <a href="#">wPt-9833</a> | 95.4  | 0.0 | No  |
| 4A | <a href="#">wPt-5749</a> | <a href="#">wPt-5749</a> | 95.4  | 0.5 | Yes |
| 4A | 14669333                 | Tdurum_contig12838_193   | 95.9  | 0.0 | Yes |
| 4A | 61742377                 | Tdurum_contig17050_547   | 95.9  | 0.0 | No  |
| 4A | 22618316                 | Tdurum_contig9260_996    | 95.9  | 1.4 | No  |
| 4A | 18709407                 | IAAV3960                 | 97.4  | 1.4 | Yes |
| 4A | 30750383                 | BS00022929_51            | 98.8  | 0.0 | Yes |
| 4A | 46709317                 | BS00032622_51            | 98.8  | 0.0 | No  |
| 4A | 54742395                 | BS00080927_51            | 98.8  | 0.0 | No  |
| 4A | 36732393                 | Excalibur_c15222_313     | 98.8  | 0.0 | No  |
| 4A | 53765340                 | Excalibur_c7897_600      | 98.8  | 0.0 | No  |
| 4A | 62702501                 | Kukri_c40856_320         | 98.8  | 0.0 | No  |
| 4A | 43677370                 | Kukri_c45531_307         | 98.8  | 0.0 | No  |
| 4A | 53699415                 | RAC875_c33109_72         | 98.8  | 0.0 | No  |
| 4A | 41765407                 | Tdurum_contig12313_290   | 98.8  | 0.0 | No  |
| 4A | 44687323                 | Tdurum_contig31344_97    | 98.8  | 0.0 | No  |
| 4A | 38705320                 | Tdurum_contig54122_1095  | 98.8  | 0.0 | No  |
| 4A | 11775407                 | Tdurum_contig54122_594   | 98.8  | 0.0 | No  |
| 4A | 18740424                 | Tdurum_contig7992_173    | 98.8  | 0.0 | No  |
| 4A | 45624307                 | Tdurum_contig7992_254    | 98.8  | 0.0 | No  |
| 4A | 70796495                 | Tdurum_contig7992_605    | 98.8  | 0.0 | No  |
| 4A | 25726379                 | wsnp_Ra_c22775_32274079  | 98.8  | 0.1 | No  |
| 4A | 34713506                 | BS00078953_51            | 98.9  | 0.9 | Yes |
| 4A | <a href="#">wPt-4596</a> | <a href="#">wPt-4596</a> | 99.8  | 4.0 | Yes |
| 4A | <a href="#">wPt-5857</a> | <a href="#">wPt-5857</a> | 103.8 |     | Yes |

|      |          |                          |     |     |     |
|------|----------|--------------------------|-----|-----|-----|
| 4B_1 | 35626365 | Tdurum_contig26052_199   | 0.0 | 0.0 | Yes |
| 4B_1 | 70803429 | BS00029013_51            | 0.0 | 0.0 | Yes |
| 4B_1 | 31635303 | BS00030843_51            | 0.0 | 0.0 | No  |
| 4B_1 | 49675374 | BS00067786_51            | 0.0 | 0.0 | No  |
| 4B_1 | 60792484 | Excalibur_c8845_1531     | 0.0 | 0.0 | No  |
| 4B_1 | 15623413 | Excalibur_rep_c69304_402 | 0.0 | 0.0 | No  |
| 4B_1 | 70733474 | GENE-2913_148            | 0.0 | 0.0 | No  |
| 4B_1 | 18754472 | IACX69                   | 0.0 | 0.0 | No  |
| 4B_1 | 20760404 | Kukri_c47660_356         | 0.0 | 0.0 | No  |
| 4B_1 | 36719329 | Kukri_rep_c110025_90     | 0.0 | 0.0 | No  |
| 4B_1 | 18760462 | RAC875_c104483_216       | 0.0 | 0.0 | No  |
| 4B_1 | 72720452 | RAC875_c18732_193        | 0.0 | 0.0 | No  |
| 4B_1 | 11786360 | RAC875_c39524_181        | 0.0 | 0.0 | No  |
| 4B_1 | 19623497 | RAC875_rep_c105832_99    | 0.0 | 0.0 | No  |
| 4B_1 | 65784509 | RAC875_rep_c91551_80     | 0.0 | 0.0 | No  |
| 4B_1 | 10700353 | Tdurum_contig25698_123   | 0.0 | 0.0 | No  |
| 4B_1 | 35664444 | Tdurum_contig29989_74    | 0.0 | 0.0 | No  |
| 4B_1 | 10686340 | Tdurum_contig4842_650    | 0.0 | 0.0 | No  |
| 4B_1 | 57744323 | Tdurum_contig52356_517   | 0.0 | 0.0 | No  |
| 4B_1 | 32608471 | Tdurum_contig52805_183   | 0.0 | 0.0 | No  |
| 4B_1 | 19685378 | Tdurum_contig52805_250   | 0.0 | 0.0 | No  |
| 4B_1 | 66723333 | Tdurum_contig5562_441    | 0.0 | 0.0 | No  |
| 4B_1 | 10782406 | Tdurum_contig5562_730    | 0.0 | 0.0 | No  |
| 4B_1 | 52669402 | Tdurum_contig56402_57    | 0.0 | 0.0 | No  |
| 4B_1 | 35644483 | Tdurum_contig75734_623   | 0.0 | 0.0 | No  |
| 4B_1 | 65627300 | Tdurum_contig85933_153   | 0.0 | 0.0 | No  |
| 4B_1 | 11727461 | Tdurum_contig94032_1528  | 0.0 | 0.0 | No  |
| 4B_1 | 60735393 | Tdurum_contig94032_1688  | 0.0 | 0.0 | No  |
| 4B_1 | 19639510 | Tdurum_contig98478_400   | 0.0 | 0.0 | No  |
| 4B_1 | 26797422 | Tdurum_contig98478_494   | 0.0 | 1.5 | No  |
| 4B_1 | 71653500 | BobWhite_c38340_243      | 1.5 | 0.0 | Yes |
| 4B_1 | 17735453 | BS00063804_51            | 1.5 | 0.0 | No  |
| 4B_1 | 35765492 | BS00064884_51            | 1.5 | 0.0 | No  |
| 4B_1 | 52632337 | BS00064935_51            | 1.5 | 0.0 | No  |
| 4B_1 | 28792338 | BS00065555_51            | 1.5 | 0.0 | No  |
| 4B_1 | 35756357 | CAP8_c9887_106           | 1.5 | 0.0 | No  |
| 4B_1 | 69759404 | Excalibur_c26226_458     | 1.5 | 0.0 | No  |
| 4B_1 | 48716377 | IAAV8654                 | 1.5 | 0.0 | No  |
| 4B_1 | 19630494 | Ra_c59822_1439           | 1.5 | 0.0 | No  |
| 4B_1 | 17734386 | RAC875_c90425_234        | 1.5 | 0.0 | No  |
| 4B_1 | 50739492 | TA003665-0980            | 1.5 | 0.0 | No  |
| 4B_1 | 33723509 | TA004394-0527            | 1.5 | 0.0 | No  |
| 4B_1 | 62632434 | wsnp_BE405519B-Ta_1_1    | 1.5 | 0.0 | No  |
| 4B_1 | 60751398 | wsnp_Ra_c15715_24192817  | 1.5 | 1.2 | No  |

|      |          |                              |      |      |     |
|------|----------|------------------------------|------|------|-----|
| 4B_1 | 48777443 | Tdurum_contig98255_148       | 2.8  | 1.4  | Yes |
| 4B_1 | 50744413 | Tdurum_contig54854_547       | 4.2  | 8.9  | Yes |
| 4B_1 | 29717467 | Tdurum_contig11593_170       | 13.2 | 4.5  | Yes |
| 4B_1 | 64654325 | BS00022194_51                | 17.7 | 0.0  | Yes |
| 4B_1 | 59773471 | Tdurum_contig51818_145       | 17.7 | 0.8  | No  |
| 4B_1 | 20681436 | wsnp_JD_c10515_11167103      | 18.4 | 0.0  | Yes |
| 4B_1 | 73617362 | BobWhite_c17457_89           | 18.4 | 0.0  | Yes |
| 4B_1 | 71700332 | BobWhite_c665_296            | 18.4 | 0.0  | No  |
| 4B_1 | 14679447 | BS00010659_51                | 18.4 | 0.0  | No  |
| 4B_1 | 58798451 | BS00010940_51                | 18.4 | 0.0  | No  |
| 4B_1 | 28748346 | BS00032203_51                | 18.4 | 0.0  | No  |
| 4B_1 | 71730410 | BS00077411_51                | 18.4 | 0.0  | No  |
| 4B_1 | 65635376 | BS00087144_51                | 18.4 | 0.0  | No  |
| 4B_1 | 57723422 | BS00107247_51                | 18.4 | 0.0  | No  |
| 4B_1 | 28696304 | Excalibur_c57212_1167        | 18.4 | 0.0  | No  |
| 4B_1 | 46664462 | Excalibur_c5769_798          | 18.4 | 0.0  | No  |
| 4B_1 | 70802317 | GENE-2361_194                | 18.4 | 0.0  | No  |
| 4B_1 | 24792306 | IAAV3421                     | 18.4 | 0.0  | No  |
| 4B_1 | 34747390 | IAAV3896                     | 18.4 | 0.0  | No  |
| 4B_1 | 47803402 | IAAV4665                     | 18.4 | 0.0  | No  |
| 4B_1 | 46745417 | IACX1099                     | 18.4 | 0.0  | No  |
| 4B_1 | 19725376 | IACX5891                     | 18.4 | 0.0  | No  |
| 4B_1 | 31756391 | IACX9352                     | 18.4 | 0.0  | No  |
| 4B_1 | 63631319 | Ku_c3385_441                 | 18.4 | 0.0  | No  |
| 4B_1 | 62611374 | Kukri_c34453_332             | 18.4 | 0.0  | No  |
| 4B_1 | 36766348 | Kukri_rep_c115927_102        | 18.4 | 0.0  | No  |
| 4B_1 | 71665506 | RAC875_c5087_310             | 18.4 | 0.0  | No  |
| 4B_1 | 22633405 | RAC875_rep_c106177_206       | 18.4 | 0.0  | No  |
| 4B_1 | 13668498 | Tdurum_contig12453_246       | 18.4 | 0.0  | No  |
| 4B_1 | 47745443 | Tdurum_contig27809_177       | 18.4 | 0.0  | No  |
| 4B_1 | 64775463 | Tdurum_contig45550_570       | 18.4 | 0.0  | No  |
| 4B_1 | 40755497 | Tdurum_contig45550_918       | 18.4 | 0.0  | No  |
| 4B_1 | 73790340 | Tdurum_contig47552_957       | 18.4 | 0.0  | No  |
| 4B_1 | 17725384 | Tdurum_contig55374_309       | 18.4 | 0.0  | No  |
| 4B_1 | 36784500 | Tdurum_contig8068_517        | 18.4 | 0.0  | No  |
| 4B_1 | 69730339 | tplb0034b12_591              | 18.4 | 0.0  | No  |
| 4B_1 | 51770472 | wsnp_CAP12_rep_c4278_1949864 | 18.4 | 0.0  | No  |
| 4B_1 | 32665469 | wsnp_Ex_c22648_31848819      | 18.4 | 0.0  | No  |
| 4B_1 | 26642338 | wsnp_Ex_c40815_47789152      | 18.4 | 0.0  | No  |
| 4B_1 | 51602383 | wsnp_Ex_c5769_10136243       | 18.4 | 0.0  | No  |
| 4B_1 | 39680381 | wsnp_Ex_c5769_10136788       | 18.4 | 0.0  | No  |
| 4B_1 | 58716338 | wsnp_JD_c2488_3379427        | 18.4 | 0.0  | No  |
| 4B_1 | 24672509 | wsnp_Ku_rep_c104382_90867406 | 18.4 | 11.5 | No  |
| 4B_1 | 72691497 | BobWhite_rep_c66020_333      | 29.9 | 0.0  | Yes |



|      |          |                         |      |     |     |
|------|----------|-------------------------|------|-----|-----|
| 4B_1 | 10651419 | Excalibur_c27139_396    | 29.9 | 0.0 | No  |
| 4B_1 | 40777354 | RFL_Contig5869_863      | 29.9 | 0.0 | No  |
| 4B_1 | 26796309 | TA011763-0791           | 29.9 | 0.0 | No  |
| 4B_1 | 42634308 | Tdurum_contig42208_263  | 29.9 | 0.0 | No  |
| 4B_1 | 42600457 | Tdurum_contig44860_1171 | 29.9 | 0.0 | No  |
| 4B_1 | 26614487 | Tdurum_contig45927_1211 | 29.9 | 0.0 | No  |
| 4B_1 | 65624355 | Tdurum_contig45927_663  | 29.9 | 0.0 | No  |
| 4B_1 | 42650439 | Tdurum_contig45927_677  | 29.9 | 0.0 | No  |
| 4B_1 | 74685411 | Tdurum_contig5470_570   | 29.9 | 0.0 | No  |
| 4B_1 | 54662334 | Tdurum_contig82603_67   | 29.9 | 0.0 | No  |
| 4B_1 | 48801437 | Tdurum_contig920_126    | 29.9 | 0.0 | No  |
| 4B_1 | 10633384 | Tdurum_contig97499_167  | 29.9 | 0.0 | No  |
| 4B_1 | 67802439 | tplb0036a20_1295        | 29.9 | 0.0 | No  |
| 4B_1 | 27799409 | Tdurum_contig45927_968  | 29.9 | 0.0 | Yes |
| 4B_1 | 31736416 | Tdurum_contig95381_152  | 29.9 | 1.5 | Yes |
| 4B_1 | 14704301 | GENE-2566_317           | 31.4 | 0.0 | Yes |
| 4B_1 | 19700466 | wsnp_BE499546B_Ta_2_1   | 31.4 | 1.5 | No  |
| 4B_1 | 62672333 | Excalibur_c49297_159    | 32.9 | 2.8 | Yes |
| 4B_1 | 26626456 | Tdurum_contig8322_2041  | 35.8 | 7.8 | Yes |
| 4B_1 | 44643306 | BobWhite_c12593_361     | 43.5 | 0.0 | Yes |
| 4B_1 | 40645303 | Tdurum_contig56458_594  | 43.5 |     | No  |
| 4B_2 | 52724327 | BS00011148_51           | 0.0  | 0.0 | Yes |
| 4B_2 | 50645494 | CAP11_c864_214          | 0.0  | 0.0 | No  |
| 4B_2 | 38697331 | CAP11_rep_c4893_84      | 0.0  | 0.0 | No  |
| 4B_2 | 31646334 | Kukri_c8386_767         | 0.0  | 0.0 | No  |
| 4B_2 | 38718318 | RAC875_rep_c106667_302  | 0.0  | 0.0 | No  |
| 4B_2 | 67724335 | wsnp_BF483640B_Ta_2_2   | 0.0  | 1.5 | No  |
| 4B_2 | 16712419 | BobWhite_c46938_314     | 1.5  | 0.0 | Yes |
| 4B_2 | 66702354 | BS00063809_51           | 1.5  | 0.0 | No  |
| 4B_2 | 42806482 | Excalibur_c55463_232    | 1.5  | 0.0 | No  |
| 4B_2 | 73809340 | Kukri_rep_c104277_1326  | 1.5  | 0.0 | No  |
| 4B_2 | 13787463 | RAC875_c22142_333       | 1.5  | 0.0 | No  |
| 4B_2 | 12691466 | Tdurum_contig42083_1308 | 1.5  | 0.0 | No  |
| 4B_2 | 63795435 | Tdurum_contig42083_1539 | 1.5  | 0.0 | No  |
| 4B_2 | 67778389 | Tdurum_contig42083_691  | 1.5  | 0.0 | No  |
| 4B_2 | 27787341 | Tdurum_contig42083_757  | 1.5  | 0.0 | No  |
| 4B_2 | 16632435 | Tdurum_contig42083_890  | 1.5  | 0.0 | No  |
| 4B_2 | 62678322 | Tdurum_contig9072_88    | 1.5  | 0.0 | No  |
| 4B_2 | 58789345 | tplb0025f09_1052        | 1.5  | 0.0 | No  |
| 4B_2 | 41795317 | tplb0025f09_1853        | 1.5  | 0.0 | No  |
| 4B_2 | 37738328 | tplb0050b23_546         | 1.5  | 1.5 | No  |
| 4B_2 | 12691373 | BS00039935_51           | 2.9  | 0.0 | Yes |
| 4B_2 | 26773364 | BS00039936_51           | 2.9  | 0.0 | No  |
| 4B_2 | 18689465 | BS00063011_51           | 2.9  |     | No  |

|    |          |                             |      |      |     |
|----|----------|-----------------------------|------|------|-----|
| 5A | 54601407 | BS00079189_51               | 0.0  | 0.0  | Yes |
| 5A | 58762339 | wsnp_Ex_c9842_16228523      | 0.0  | 21.3 | No  |
| 5A | 73629406 | BobWhite_c4004_61           | 21.3 | 0.0  | Yes |
| 5A | 59756317 | Excalibur_c19267_919        | 21.3 | 0.0  | No  |
| 5A | 35710467 | Tdurum_contig11173_79       | 21.3 | 0.0  | No  |
| 5A | 53765359 | Tdurum_contig45977_1319     | 21.3 | 3.0  | No  |
| 5A | 59624342 | BS00041219_51               | 24.3 | 0.0  | Yes |
| 5A | 45649340 | BS00041220_51               | 24.3 | 0.0  | No  |
| 5A | 14803507 | BS00045473_51               | 24.3 | 0.0  | No  |
| 5A | 62680354 | BS00077990_51               | 24.3 | 0.0  | No  |
| 5A | 23604372 | Ra_c24707_827               | 24.3 | 0.0  | No  |
| 5A | 65609349 | wsnp_Ra_c24707_34262900     | 24.3 | 1.5  | No  |
| 5A | 47759479 | RAC875_c55661_677           | 25.8 | 0.0  | Yes |
| 5A | 24612436 | Tdurum_contig76578_537      | 25.8 | 0.0  | No  |
| 5A | 35643468 | wsnp_Ku_c1102_2211433       | 25.8 | 1.5  | No  |
| 5A | 63732345 | BobWhite_c5839_341          | 27.3 | 0.0  | Yes |
| 5A | 40660507 | BobWhite_rep_c49153_721     | 27.3 | 0.0  | No  |
| 5A | 25718321 | BobWhite_rep_c63777_325     | 27.3 | 0.0  | No  |
| 5A | 47609438 | CAP7_c6531_308              | 27.3 | 0.0  | No  |
| 5A | 15606364 | Excalibur_c4912_106         | 27.3 | 0.0  | No  |
| 5A | 70635332 | Excalibur_c64265_224        | 27.3 | 0.0  | No  |
| 5A | 27704301 | Tdurum_contig10398_2166     | 27.3 | 0.0  | No  |
| 5A | 70655385 | Tdurum_contig12465_596      | 27.3 | 0.0  | No  |
| 5A | 42618339 | Tdurum_contig42128_10375    | 27.3 | 0.0  | No  |
| 5A | 27680391 | Tdurum_contig52610_144      | 27.3 | 0.0  | No  |
| 5A | 46744473 | Tdurum_contig65805_1015     | 27.3 | 0.0  | No  |
| 5A | 32655399 | Tdurum_contig75624_375      | 27.3 | 0.0  | No  |
| 5A | 57643372 | Tdurum_contig77937_226      | 27.3 | 0.0  | No  |
| 5A | 60701339 | wsnp_RFL_Contig4307_5006558 | 27.3 | 1.9  | No  |
| 5A | 64676427 | BobWhite_c17170_99          | 29.1 | 0.0  | Yes |
| 5A | 74690424 | BS00032406_51               | 29.1 | 0.0  | No  |
| 5A | 56652400 | BS00051181_51               | 29.1 | 0.0  | No  |
| 5A | 60610438 | BS00062427_51               | 29.1 | 0.0  | No  |
| 5A | 10656403 | CAP11_c3113_79              | 29.1 | 0.0  | No  |
| 5A | 20649349 | CAP12_c667_143              | 29.1 | 0.0  | No  |
| 5A | 45636318 | Ku_c21587_754               | 29.1 | 0.0  | No  |
| 5A | 21804410 | Ra_c144_1023                | 29.1 | 0.0  | No  |
| 5A | 50670329 | Ra_c33743_472               | 29.1 | 0.0  | No  |
| 5A | 66750368 | RAC875_c55468_242           | 29.1 | 0.0  | No  |
| 5A | 56724443 | RAC875_c8895_1029           | 29.1 | 0.0  | No  |
| 5A | 30787323 | RAC875_c96615_107           | 29.1 | 0.0  | No  |
| 5A | 47764347 | Tdurum_contig15250_312      | 29.1 | 0.0  | No  |
| 5A | 44714374 | Tdurum_contig45240_1309     | 29.1 | 0.0  | No  |
| 5A | 25700406 | Tdurum_contig61258_264      | 29.1 | 4.6  | No  |

|    |          |                         |      |     |     |
|----|----------|-------------------------|------|-----|-----|
| 5A | wPt-5588 | wPt-5588                | 33.7 | 3.2 | Yes |
| 5A | 60634412 | RFL_Contig727_736       | 36.9 | 0.1 | Yes |
| 5A | 11780448 | Ex_c6161_335            | 37.0 | 0.1 | Yes |
| 5A | 32601419 | BS00022003_51           | 37.1 | 0.0 | Yes |
| 5A | 40732334 | BS00034101_51           | 37.1 | 0.0 | No  |
| 5A | 55624331 | BS00034704_51           | 37.1 | 0.0 | No  |
| 5A | 45629430 | BS00043474_51           | 37.1 | 0.0 | No  |
| 5A | 44661476 | BS00067453_51           | 37.1 | 0.0 | No  |
| 5A | 17679489 | BS00076190_51           | 37.1 | 0.0 | No  |
| 5A | 38756316 | BS00089966_51           | 37.1 | 0.0 | No  |
| 5A | 26786311 | BS00089967_51           | 37.1 | 0.0 | No  |
| 5A | 55788326 | BS00089968_51           | 37.1 | 0.0 | No  |
| 5A | 36716345 | IAAV3512                | 37.1 | 0.0 | No  |
| 5A | 51622368 | IAAV9057                | 37.1 | 0.0 | No  |
| 5A | 52808317 | IACX815                 | 37.1 | 0.0 | No  |
| 5A | 65665414 | Kukri_c27691_226        | 37.1 | 0.0 | No  |
| 5A | 51768318 | Kukri_c7633_724         | 37.1 | 0.0 | No  |
| 5A | 20643484 | RAC875_c4033_192        | 37.1 | 0.0 | No  |
| 5A | 26785401 | RAC875_c58966_471       | 37.1 | 0.0 | No  |
| 5A | 37734387 | RAC875_c7794_542        | 37.1 | 0.0 | No  |
| 5A | 48764510 | RAC875_c95309_460       | 37.1 | 0.0 | No  |
| 5A | 60678452 | Tdurum_contig12967_831  | 37.1 | 0.0 | No  |
| 5A | 44749424 | Tdurum_contig28306_292  | 37.1 | 0.0 | No  |
| 5A | 48685328 | Tdurum_contig43413_1432 | 37.1 | 0.0 | No  |
| 5A | 73679345 | Tdurum_contig48766_257  | 37.1 | 0.0 | No  |
| 5A | 23745395 | Tdurum_contig50282_211  | 37.1 | 0.0 | No  |
| 5A | 72794454 | Tdurum_contig50282_269  | 37.1 | 0.0 | No  |
| 5A | 32658456 | Tdurum_contig50282_516  | 37.1 | 0.0 | No  |
| 5A | 16720468 | Tdurum_contig54737_537  | 37.1 | 0.0 | No  |
| 5A | 22606498 | Tdurum_contig81510_198  | 37.1 | 0.0 | No  |
| 5A | 35644301 | Tdurum_contig88305_380  | 37.1 | 0.0 | No  |
| 5A | 48600375 | wsnp_Ex_c43578_49857984 | 37.1 | 0.6 | No  |
| 5A | 26693300 | Excalibur_c65171_418    | 37.7 | 0.0 | Yes |
| 5A | 65614480 | tplb0039m09_92          | 37.7 | 0.0 | No  |
| 5A | 25723353 | wsnp_JD_c1796_2496653   | 37.7 | 5.5 | No  |
| 5A | 46765398 | Tdurum_contig60405_714  | 43.1 | 9.6 | Yes |
| 5A | 55619327 | BS00003618_51           | 52.7 | 0.0 | Yes |
| 5A | 44767313 | Excalibur_c47321_138    | 52.7 | 0.0 | No  |
| 5A | 19638393 | GENE-3528_61            | 52.7 | 0.0 | No  |
| 5A | 36715448 | IACX5879                | 52.7 | 0.0 | No  |
| 5A | 18716414 | Kukri_rep_c77459_316    | 52.7 | 0.0 | No  |
| 5A | 67701360 | Tdurum_contig11933_1503 | 52.7 | 0.0 | No  |
| 5A | 20783361 | Tdurum_contig49187_601  | 52.7 | 0.0 | No  |
| 5A | 37701363 | wsnp_Ex_c31017_39858962 | 52.7 | 0.0 | No  |

|    |          |                           |       |      |     |
|----|----------|---------------------------|-------|------|-----|
| 5A | 42736366 | RAC875_c35993_308         | 52.7  | 17.6 | Yes |
| 5A | 62649398 | IACX1979                  | 70.3  | 2.9  | Yes |
| 5A | 57684495 | Tdurum_contig48760_112    | 73.2  | 2.8  | Yes |
| 5A | 53800402 | BS00068178_51             | 76.0  | 0.0  | Yes |
| 5A | 63629338 | BS00072155_51             | 76.0  | 0.0  | No  |
| 5A | 72645345 | BS00098207_51             | 76.0  | 0.0  | No  |
| 5A | 67624427 | GENE-3189_377             | 76.0  | 0.0  | No  |
| 5A | 31615346 | GENE-3318_556             | 76.0  | 0.0  | No  |
| 5A | 20753330 | Jagger_c4318_79           | 76.0  | 0.0  | No  |
| 5A | 61687427 | Jagger_c6106_119          | 76.0  | 0.0  | No  |
| 5A | 43635369 | Kukri_c14889_1086         | 76.0  | 0.0  | No  |
| 5A | 39690453 | Kukri_c14889_116          | 76.0  | 0.0  | No  |
| 5A | 29722311 | Kukri_c75754_239          | 76.0  | 0.0  | No  |
| 5A | 37784425 | Kukri_s112978_54          | 76.0  | 0.0  | No  |
| 5A | 48737452 | Tdurum_contig17500_876    | 76.0  | 1.5  | No  |
| 5A | 39767412 | Kukri_c25121_146          | 77.5  | 6.0  | Yes |
| 5A | 28616478 | BobWhite_rep_c63943_76    | 83.5  | 0.0  | Yes |
| 5A | 22636424 | Excalibur_c9210_168       | 83.5  | 0.0  | No  |
| 5A | 44789340 | Excalibur_rep_c68708_80   | 83.5  | 0.0  | No  |
| 5A | 57664457 | Kukri_c41594_74           | 83.5  | 0.0  | No  |
| 5A | 17687404 | Tdurum_contig10124_967    | 83.5  | 1.6  | No  |
| 5A | 15773324 | BobWhite_c14291_666       | 85.0  | 0.0  | Yes |
| 5A | 61622461 | BS00022215_51             | 85.0  | 0.0  | No  |
| 5A | 58809349 | BS00055981_51             | 85.0  | 0.0  | No  |
| 5A | 20621423 | D_GB5Y7FA02JGU4G_88       | 85.0  | 0.0  | No  |
| 5A | 65735461 | Excalibur_c45853_1161     | 85.0  | 0.0  | No  |
| 5A | 73769503 | Excalibur_c45894_344      | 85.0  | 0.0  | No  |
| 5A | 62628419 | Excalibur_rep_c106365_485 | 85.0  | 0.0  | No  |
| 5A | 48620447 | IAAV2542                  | 85.0  | 0.0  | No  |
| 5A | 44765506 | RAC875_c13164_695         | 85.0  | 0.0  | No  |
| 5A | 50683412 | Tdurum_contig10601_289    | 85.0  | 0.0  | No  |
| 5A | 66705466 | wsnp_Ku_c12211_19780409   | 85.0  | 9.2  | No  |
| 5A | 64738435 | BobWhite_c20974_103       | 94.2  | 0.0  | Yes |
| 5A | 19665304 | BS00065292_51             | 94.2  | 3.2  | No  |
| 5A | 58657364 | RFL_Contig2031_2040       | 97.4  | 4.7  | Yes |
| 5A | 32727485 | BS00035256_51             | 102.1 | 0.0  | Yes |
| 5A | 51611391 | Kukri_c54152_242          | 102.1 | 0.0  | No  |
| 5A | 16744480 | Ra_c22700_818             | 102.1 | 0.0  | No  |
| 5A | 66800427 | Ra_c22700_943             | 102.1 | 0.0  | No  |
| 5A | 14624459 | wsnp_Ku_c21275_31007309   | 102.1 | 13.0 | No  |
| 5A | 51782323 | BS00029871_51             | 115.1 | 0.0  | Yes |
| 5A | 64740437 | RAC875_c23775_406         | 115.1 | 0.0  | No  |
| 5A | 12630389 | Tdurum_contig36142_150    | 115.1 | 0.0  | No  |
| 5A | 30677387 | wsnp_Ex_c15342_23592789   | 115.1 | 4.2  | No  |

|    |          |                           |       |     |     |
|----|----------|---------------------------|-------|-----|-----|
| 5A | 45633326 | BobWhite_c21949_150       | 119.3 | 0.0 | Yes |
| 5A | 68706442 | BobWhite_c40643_370       | 119.3 | 0.0 | No  |
| 5A | 59736416 | BS00006196_51             | 119.3 | 0.0 | No  |
| 5A | 54614423 | BS00011360_51             | 119.3 | 0.0 | No  |
| 5A | 57644388 | BS00075959_51             | 119.3 | 0.0 | No  |
| 5A | 34701329 | BS00096940_51             | 119.3 | 0.0 | No  |
| 5A | 67758376 | BS00097986_51             | 119.3 | 0.0 | No  |
| 5A | 72801386 | Excalibur_c23354_306      | 119.3 | 0.0 | No  |
| 5A | 69625461 | Excalibur_c3743_1624      | 119.3 | 0.0 | No  |
| 5A | 10691459 | Excalibur_c7729_144       | 119.3 | 0.0 | No  |
| 5A | 73683480 | Excalibur_rep_c111129_125 | 119.3 | 0.0 | No  |
| 5A | 29752431 | GENE-2326_353             | 119.3 | 0.0 | No  |
| 5A | 54694482 | IAAV3043                  | 119.3 | 0.0 | No  |
| 5A | 74768451 | IAAV3365                  | 119.3 | 0.0 | No  |
| 5A | 46688401 | IAAV8669                  | 119.3 | 0.0 | No  |
| 5A | 33690483 | IACX10100                 | 119.3 | 0.0 | No  |
| 5A | 10810494 | JD_c889_708               | 119.3 | 0.0 | No  |
| 5A | 56714369 | Ku_c19858_2078            | 119.3 | 0.0 | No  |
| 5A | 19681499 | Kukri_c33022_198          | 119.3 | 0.0 | No  |
| 5A | 17668437 | Ra_c14657_678             | 119.3 | 0.0 | No  |
| 5A | 17755342 | Ra_c14657_919             | 119.3 | 0.0 | No  |
| 5A | 19742361 | Ra_c3838_1644             | 119.3 | 0.0 | No  |
| 5A | 14694372 | Ra_c3838_861              | 119.3 | 0.0 | No  |
| 5A | 22806346 | Ra_c7619_526              | 119.3 | 0.0 | No  |
| 5A | 37753420 | RAC875_c11404_610         | 119.3 | 0.0 | No  |
| 5A | 63717399 | RAC875_c3838_1378         | 119.3 | 0.0 | No  |
| 5A | 61794333 | RAC875_c5850_287          | 119.3 | 0.0 | No  |
| 5A | 18799431 | Tdurum_contig10759_260    | 119.3 | 0.0 | No  |
| 5A | 46792379 | Tdurum_contig56267_180    | 119.3 | 0.0 | No  |
| 5A | 60728509 | Tdurum_contig64587_107    | 119.3 | 0.0 | No  |
| 5A | 45655435 | Tdurum_contig67291_367    | 119.3 | 0.0 | No  |
| 5A | 42653500 | Tdurum_contig81424_675    | 119.3 | 0.0 | No  |
| 5A | 17733427 | wsnp_AJ612027A_Ta_2_5     | 119.3 | 0.0 | No  |
| 5A | 14719353 | wsnp_BF293620A_Ta_2_1     | 119.3 | 0.0 | No  |
| 5A | 40625459 | wsnp_Ex_c54193_57155537   | 119.3 | 0.0 | No  |
| 5A | 48751393 | wsnp_Ex_c54193_57155632   | 119.3 | 1.4 | No  |
| 5A | 41603352 | BS00041063_51             | 120.7 | 0.0 | Yes |
| 5A | 37715351 | RFL_Contig316_572         | 120.7 | 0.0 | No  |
| 5A | 60745328 | Tdurum_contig10843_745    | 120.7 | 0.0 | No  |
| 5A | 18698375 | Tdurum_contig47120_587    | 120.7 | 0.0 | No  |
| 5A | 67646501 | Tdurum_contig50175_875    | 120.7 | 0.0 | No  |
| 5A | 73613376 | Tdurum_contig69612_781    | 120.7 | 0.0 | No  |
| 5A | 64768438 | wsnp_Ex_c621_1231298      | 120.7 | 0.0 | No  |
| 5A | 70710376 | wsnp_Ex_c621_1231444      | 120.7 | 0.0 | No  |

|    |          |                         |       |     |     |
|----|----------|-------------------------|-------|-----|-----|
| 5A | 70782385 | wsnp_Ex_c8424_14192191  | 120.7 | 1.5 | No  |
| 5A | 73671327 | BS00073849_51           | 122.2 | 0.0 | Yes |
| 5A | 34741365 | Excalibur_c49550_97     | 122.2 | 0.0 | No  |
| 5A | 43730507 | Ku_c12469_983           | 122.2 | 0.0 | No  |
| 5A | 44731342 | Tdurum_contig10086_387  | 122.2 | 0.0 | No  |
| 5A | 20668451 | Tdurum_contig10587_601  | 122.2 | 0.0 | No  |
| 5A | 16732355 | Tdurum_contig29286_319  | 122.2 | 0.0 | No  |
| 5A | 29675416 | Tdurum_contig54543_1242 | 122.2 | 0.0 | No  |
| 5A | 66614404 | Tdurum_contig54543_173  | 122.2 | 0.0 | No  |
| 5A | 38602372 | Tdurum_contig54543_888  | 122.2 | 0.0 | No  |
| 5A | 29702375 | Tdurum_contig81907_126  | 122.2 | 1.3 | No  |
| 5A | 58667483 | Tdurum_contig85105_286  | 123.6 | 0.0 | Yes |
| 5A | 18631345 | wsnp_BF484028B_Td_2_1   | 123.6 | 1.5 | No  |
| 5A | 69610376 | Kukri_c49530_762        | 125.1 | 1.5 | Yes |
| 5A | 23632484 | RAC875_c19302_82        | 126.5 | 1.4 | Yes |
| 5A | 59714421 | RAC875_c65358_186       | 127.9 | 0.0 | Yes |
| 5A | 45748450 | Tdurum_contig54725_586  | 127.9 | 3.0 | No  |
| 5A | 29755395 | BS00026916_51           | 130.9 | 0.0 | Yes |
| 5A | 72773340 | GENE-2344_73            | 130.9 | 0.0 | No  |
| 5A | 18651498 | Ku_c6824_1023           | 130.9 | 0.0 | No  |
| 5A | 16690344 | Kukri_rep_c92945_759    | 130.9 | 0.0 | No  |
| 5A | 17733322 | RAC875_rep_c112818_307  | 130.9 | 0.0 | No  |
| 5A | 35652393 | Tdurum_contig47101_301  | 130.9 | 0.0 | No  |
| 5A | 26781479 | Tdurum_contig53340_355  | 130.9 | 0.0 | No  |
| 5A | 40618351 | Tdurum_contig53340_953  | 130.9 | 0.0 | No  |
| 5A | 70666406 | wsnp_Ex_c40019_47166980 | 130.9 | 1.5 | No  |
| 5A | 26786398 | BS00069739_51           | 132.4 | 0.0 | Yes |
| 5A | 40683367 | BobWhite_c14689_172     | 132.4 | 0.0 | Yes |
| 5A | 43742437 | BobWhite_c16397_524     | 132.4 | 0.0 | No  |
| 5A | 57729347 | IAAV8042                | 132.4 | 0.0 | No  |
| 5A | 50741393 | IACX2540                | 132.4 | 0.0 | No  |
| 5A | 16640343 | Ku_c21235_676           | 132.4 | 0.0 | No  |
| 5A | 30805496 | Ku_c5215_1361           | 132.4 | 0.0 | No  |
| 5A | 66601420 | Tdurum_contig50212_471  | 132.4 | 0.0 | No  |
| 5A | 44703427 | wsnp_BG607308A_Ta_2_1   | 132.4 | 0.0 | No  |
| 5A | 63672501 | wsnp_BG607308A_Ta_2_2   | 132.4 | 0.0 | No  |
| 5A | 49749362 | wsnp_Ex_c3772_6866645   | 132.4 | 1.2 | No  |
| 5A | 38795321 | Tdurum_contig42905_282  | 133.5 | 2.7 | Yes |
| 5A | 19769316 | CAP7_c2618_188          | 136.2 | 0.0 | Yes |
| 5A | 69744491 | RAC875_c62807_251       | 136.2 | 0.8 | No  |
| 5A | wPt-8155 | wPt-8155                | 137.0 | 0.7 | Yes |
| 5A | wPt-2070 | wPt-2070                | 137.7 | 2.0 | Yes |
| 5A | 15621365 | BobWhite_c42433_340     | 139.7 | 0.0 | Yes |
| 5A | 54758377 | BS00104432_51           | 139.7 | 0.0 | No  |

|      |                          |                          |       |     |     |
|------|--------------------------|--------------------------|-------|-----|-----|
| 5A   | 54603348                 | Tdurum_contig62330_431   | 139.7 | 0.0 | No  |
| 5A   | 60728397                 | Tdurum_contig62330_88    | 139.7 | 0.0 | No  |
| 5A   | 24638305                 | Tdurum_contig9074_2085   | 139.7 | 5.8 | No  |
| 5A   | 26650306                 | CAP12_c2984_189          | 145.5 | 7.8 | Yes |
| 5A   | 30793422                 | BS00028356_51            | 153.4 | 0.0 | Yes |
| 5A   | 56604460                 | RAC875_c34007_292        | 153.4 | 0.0 | No  |
| 5A   | 56810429                 | wsnp_Ex_c1481_2831499    | 153.4 | 1.5 | No  |
| 5A   | 67709480                 | BS00085711_51            | 154.9 | 0.0 | Yes |
| 5A   | 47779312                 | GENE-2890_445            | 154.9 | 0.0 | No  |
| 5A   | 54690476                 | IAAV3527                 | 154.9 | 0.0 | No  |
| 5A   | 74737373                 | RAC875_c55872_149        | 154.9 | 0.0 | No  |
| 5A   | 24753319                 | TA003720-0955            | 154.9 | 0.0 | No  |
| 5A   | 24664305                 | wsnp_CAP11_c923_558715   | 154.9 | 0.0 | No  |
| 5A   | 56713413                 | wsnp_Ex_c16295_24772663  | 154.9 | 0.0 | No  |
| 5A   | 66790432                 | wsnp_Ex_c23968_33209660  | 154.9 | 0.0 | No  |
| 5A   | 41650485                 | wsnp_Ex_c23968_33209733  | 154.9 | 0.0 | No  |
| 5A   | 66773324                 | wsnp_Ex_c23968_33210208  | 154.9 | 0.0 | No  |
| 5A   | 53794466                 | wsnp_Ex_c54655_57455110  | 154.9 | 0.0 | No  |
| 5A   | 55659337                 | wsnp_Ku_c3953_7233359    | 154.9 | 0.1 | No  |
| 5A   | 17682402                 | wsnp_Ex_c23968_33210344  | 155.0 | 1.5 | Yes |
| 5A   | 73701316                 | Tdurum_contig11774_1894  | 156.4 |     | Yes |
| 5B_1 | <a href="#">rPt-7889</a> | <a href="#">rPt-7889</a> | 0.0   | 1.5 | Yes |
| 5B_1 | <a href="#">tPt-1253</a> | <a href="#">tPt-1253</a> | 1.5   | 0.1 | Yes |
| 5B_1 | <a href="#">wPt-8931</a> | <a href="#">wPt-8931</a> | 1.7   | 1.4 | Yes |
| 5B_1 | 48610314                 | Tdurum_contig51422_127   | 3.1   | 0.1 | Yes |
| 5B_1 | 44664423                 | BobWhite_c22036_399      | 3.1   | 0.0 | Yes |
| 5B_1 | 27617475                 | BobWhite_c22572_782      | 3.1   | 0.0 | No  |
| 5B_1 | 39626376                 | BobWhite_c4905_267       | 3.1   | 0.0 | No  |
| 5B_1 | 54722466                 | BobWhite_c6017_1096      | 3.1   | 0.0 | No  |
| 5B_1 | 46800414                 | BobWhite_c6017_1147      | 3.1   | 0.0 | No  |
| 5B_1 | 51772393                 | BS00021960_51            | 3.1   | 0.0 | No  |
| 5B_1 | 47758372                 | BS00037103_51            | 3.1   | 0.0 | No  |
| 5B_1 | 67610444                 | BS00037104_51            | 3.1   | 0.0 | No  |
| 5B_1 | 65796447                 | BS00065029_51            | 3.1   | 0.0 | No  |
| 5B_1 | 31754383                 | CAP7_c1274_206           | 3.1   | 0.0 | No  |
| 5B_1 | 18693361                 | D_GDS7LZN02FRZ4J_84      | 3.1   | 0.0 | No  |
| 5B_1 | 40748380                 | Ex_c71558_391            | 3.1   | 0.0 | No  |
| 5B_1 | 13730491                 | Excalibur_c12395_467     | 3.1   | 0.0 | No  |
| 5B_1 | 13642310                 | Excalibur_c3350_265      | 3.1   | 0.0 | No  |
| 5B_1 | 22723318                 | Kukri_c10508_253         | 3.1   | 0.0 | No  |
| 5B_1 | 63688415                 | Kukri_c10508_438         | 3.1   | 0.0 | No  |
| 5B_1 | 55679382                 | Kukri_c10508_755         | 3.1   | 0.0 | No  |
| 5B_1 | 46696491                 | Kukri_c23743_112         | 3.1   | 0.0 | No  |
| 5B_1 | 12774435                 | Kukri_c25613_1347        | 3.1   | 0.0 | No  |

|      |                          |                              |     |     |     |
|------|--------------------------|------------------------------|-----|-----|-----|
| 5B_1 | 58795434                 | Kukri_c45951_367             | 3.1 | 0.0 | No  |
| 5B_1 | 70727310                 | RAC875_c10819_636            | 3.1 | 0.0 | No  |
| 5B_1 | 15659326                 | RAC875_c45114_564            | 3.1 | 0.0 | No  |
| 5B_1 | 37806359                 | RAC875_rep_c109634_90        | 3.1 | 0.0 | No  |
| 5B_1 | 55694502                 | RAC875_rep_c91630_132        | 3.1 | 0.0 | No  |
| 5B_1 | 44703428                 | Tdurum_contig11399_221       | 3.1 | 0.0 | No  |
| 5B_1 | 50788475                 | Tdurum_contig24416_284       | 3.1 | 0.0 | No  |
| 5B_1 | 37678303                 | Tdurum_contig25692_435       | 3.1 | 0.0 | No  |
| 5B_1 | 45763382                 | Tdurum_contig48335_209       | 3.1 | 0.0 | No  |
| 5B_1 | 53745330                 | Tdurum_contig57696_133       | 3.1 | 0.0 | No  |
| 5B_1 | 48744371                 | Tdurum_contig81548_426       | 3.1 | 0.0 | No  |
| 5B_1 | 39765313                 | Tdurum_contig82473_67        | 3.1 | 0.0 | No  |
| 5B_1 | 28776416                 | Tdurum_contig85060_121       | 3.1 | 0.0 | No  |
| 5B_1 | 53792410                 | Tdurum_contig85060_281       | 3.1 | 0.0 | No  |
| 5B_1 | 60668454                 | Tdurum_contig94033_487       | 3.1 | 0.0 | No  |
| 5B_1 | 25610309                 | Tdurum_contig94033_717       | 3.1 | 0.0 | No  |
| 5B_1 | 66616318                 | tplb0058f13_242              | 3.1 | 0.0 | No  |
| 5B_1 | 12643387                 | wsnp_Ex_c11070_17950604      | 3.1 | 0.0 | No  |
| 5B_1 | 20694305                 | wsnp_Ex_c32872_41456586      | 3.1 | 0.0 | No  |
| 5B_1 | 61659480                 | wsnp_Ex_c53426_56666463      | 3.1 | 0.0 | No  |
| 5B_1 | 27745317                 | wsnp_Ex_c53426_56666788      | 3.1 | 0.0 | No  |
| 5B_1 | 13706457                 | wsnp_Ex_c53426_56667282      | 3.1 | 0.0 | No  |
| 5B_1 | 64729450                 | wsnp_JD_c6562_7716133        | 3.1 | 0.0 | No  |
| 5B_1 | 59772379                 | wsnp_Ku_rep_c102339_89347150 | 3.1 | 1.4 | No  |
| 5B_1 | 21709402                 | Kukri_c20813_85              | 4.5 | 0.0 | Yes |
| 5B_1 | 36759348                 | Tdurum_contig68741_839       | 4.5 | 0.0 | No  |
| 5B_1 | 58669350                 | Tdurum_contig85339_162       | 4.5 | 0.0 | No  |
| 5B_1 | 31672460                 | wsnp_BG607308B_Ta_2_1        | 4.5 | 1.0 | No  |
| 5B_1 | <a href="#">rPt-3114</a> | <a href="#">rPt-3114</a>     | 5.5 | 0.4 | Yes |
| 5B_1 | 49623369                 | BS00035963_51                | 5.9 | 0.0 | Yes |
| 5B_1 | 42665471                 | Excalibur_c6279_381          | 5.9 | 0.0 | No  |
| 5B_1 | 53648405                 | Excalibur_rep_c104627_106    | 5.9 | 0.0 | No  |
| 5B_1 | 73684351                 | Excalibur_rep_c112275_315    | 5.9 | 0.0 | No  |
| 5B_1 | 66738433                 | GENE-0620_95                 | 5.9 | 0.0 | No  |
| 5B_1 | 68644302                 | Kukri_c718_285               | 5.9 | 0.0 | No  |
| 5B_1 | 39767309                 | RAC875_rep_c109097_771       | 5.9 | 0.0 | No  |
| 5B_1 | 73679329                 | RFL_Contig3835_2474          | 5.9 | 0.0 | No  |
| 5B_1 | 10638468                 | RFL_Contig3835_2578          | 5.9 | 0.0 | No  |
| 5B_1 | 62612369                 | RFL_Contig3835_475           | 5.9 | 0.0 | No  |
| 5B_1 | 37668463                 | Tdurum_contig14404_319       | 5.9 | 0.0 | No  |
| 5B_1 | 66769435                 | Tdurum_contig28272_126       | 5.9 | 0.0 | No  |
| 5B_1 | 51780451                 | Tdurum_contig28377_271       | 5.9 | 0.0 | No  |
| 5B_1 | 31809394                 | Tdurum_contig83644_276       | 5.9 | 0.0 | No  |
| 5B_1 | 17802339                 | Tdurum_contig83644_363       | 5.9 | 0.8 | No  |



|      |          |                           |      |     |     |
|------|----------|---------------------------|------|-----|-----|
| 5B_1 | 62655413 | BobWhite_c13340_412       | 6.7  | 0.0 | Yes |
| 5B_1 | 27679309 | BobWhite_rep_c60245_107   | 6.7  | 0.0 | No  |
| 5B_1 | 45711434 | BS00023064_51             | 6.7  | 0.0 | No  |
| 5B_1 | 29609334 | BS00023067_51             | 6.7  | 0.0 | No  |
| 5B_1 | 36663418 | BS00037487_51             | 6.7  | 0.0 | No  |
| 5B_1 | 14735484 | BS00048205_51             | 6.7  | 0.0 | No  |
| 5B_1 | 20803415 | BS00066039_51             | 6.7  | 0.0 | No  |
| 5B_1 | 42772501 | Excalibur_c15141_684      | 6.7  | 0.0 | No  |
| 5B_1 | 54661453 | GENE-2944_81              | 6.7  | 0.0 | No  |
| 5B_1 | 49626366 | IACX6070                  | 6.7  | 0.0 | No  |
| 5B_1 | 23629413 | Kukri_c3973_101           | 6.7  | 0.0 | No  |
| 5B_1 | 39644381 | Kukri_c44654_98           | 6.7  | 0.0 | No  |
| 5B_1 | 17777404 | Ra_c9527_234              | 6.7  | 0.0 | No  |
| 5B_1 | 40732355 | RFL_Contig1265_515        | 6.7  | 0.0 | No  |
| 5B_1 | 59771378 | RFL_Contig3885_1183       | 6.7  | 0.0 | No  |
| 5B_1 | 41676489 | Tdurum_contig14326_495    | 6.7  | 0.0 | No  |
| 5B_1 | 11678457 | Tdurum_contig14326_597    | 6.7  | 0.0 | No  |
| 5B_1 | 15640301 | Tdurum_contig19615_188    | 6.7  | 0.0 | No  |
| 5B_1 | 22669374 | Tdurum_contig29967_456    | 6.7  | 0.0 | No  |
| 5B_1 | 73641306 | Tdurum_contig31657_465    | 6.7  | 0.0 | No  |
| 5B_1 | 18794443 | Tdurum_contig47491_258    | 6.7  | 0.0 | No  |
| 5B_1 | 60805384 | Tdurum_contig62260_270    | 6.7  | 0.0 | No  |
| 5B_1 | 53616326 | Tdurum_contig70554_1004   | 6.7  | 0.0 | No  |
| 5B_1 | 44756351 | Tdurum_contig70554_1006   | 6.7  | 0.0 | No  |
| 5B_1 | 11785412 | Tdurum_contig82077_129    | 6.7  | 0.0 | No  |
| 5B_1 | 20639331 | Tdurum_contig82077_336    | 6.7  | 0.0 | No  |
| 5B_1 | 32670423 | Tdurum_contig85945_281    | 6.7  | 0.0 | No  |
| 5B_1 | 60640464 | Tdurum_contig92419_429    | 6.7  | 0.0 | No  |
| 5B_1 | 62704370 | wsnp_Ex_c12152_19429932   | 6.7  | 0.0 | No  |
| 5B_1 | 27793369 | wsnp_Ex_c12152_19431363   | 6.7  | 0.0 | No  |
| 5B_1 | 37680301 | wsnp_Ex_c3019_5578488     | 6.7  | 0.0 | No  |
| 5B_1 | 33603314 | wsnp_Ex_c6571_11387527    | 6.7  | 4.7 | No  |
| 5B_1 | 10737414 | Excalibur_c100531_251     | 11.5 | 0.0 | Yes |
| 5B_1 | 29616492 | Excalibur_rep_c106165_238 | 11.5 | 0.0 | No  |
| 5B_1 | 16711441 | Tdurum_contig10669_1535   | 11.5 | 0.0 | No  |
| 5B_1 | 50702389 | Tdurum_contig10669_1557   | 11.5 | 0.0 | No  |
| 5B_1 | 59641397 | Tdurum_contig10669_1621   | 11.5 | 0.0 | No  |
| 5B_1 | 69639461 | Tdurum_contig14490_593    | 11.5 | 0.0 | No  |
| 5B_1 | 10799336 | Tdurum_contig28353_1110   | 11.5 | 0.0 | No  |
| 5B_1 | 45636362 | Tdurum_contig28353_1628   | 11.5 | 0.0 | No  |
| 5B_1 | 36745385 | Tdurum_contig28353_1720   | 11.5 | 0.0 | No  |
| 5B_1 | 18715499 | Tdurum_contig98569_290    | 11.5 | 0.0 | No  |
| 5B_1 | 46800510 | Tdurum_contig98569_56     | 11.5 | 7.3 | No  |
| 5B_1 | wPt-6014 | wPt-6014                  | 18.8 | 1.1 | Yes |

|      |          |                          |      |     |     |
|------|----------|--------------------------|------|-----|-----|
| 5B_1 | 19758486 | BS00062762_51            | 19.9 | 0.0 | Yes |
| 5B_1 | 16677467 | IACX5702                 | 19.9 | 3.8 | No  |
| 5B_1 | wPt-3763 | wPt-3763                 | 23.7 | 1.2 | Yes |
| 5B_1 | wPt-8054 | wPt-8054                 | 24.9 | 0.0 | Yes |
| 5B_1 | wPt-5928 | wPt-5928                 | 24.9 | 1.8 | No  |
| 5B_1 | wPt-6989 | wPt-6989                 | 26.7 | 0.0 | Yes |
| 5B_1 | wPt-4367 | wPt-4367                 | 26.7 | 0.3 | No  |
| 5B_1 | 37796358 | BS00010311_51            | 27.0 | 0.0 | Yes |
| 5B_1 | 18714433 | BS00011453_51            | 27.0 | 0.0 | No  |
| 5B_1 | 33648371 | BS00036434_51            | 27.0 | 0.0 | No  |
| 5B_1 | 44694392 | BS00067331_51            | 27.0 | 0.0 | No  |
| 5B_1 | 22775459 | BS00093522_51            | 27.0 | 0.0 | No  |
| 5B_1 | 22648445 | Excalibur_c38433_291     | 27.0 | 0.0 | No  |
| 5B_1 | 11661412 | Excalibur_rep_c69730_391 | 27.0 | 0.0 | No  |
| 5B_1 | 52755489 | IAAV1148                 | 27.0 | 0.0 | No  |
| 5B_1 | 58685434 | IAAV475                  | 27.0 | 0.0 | No  |
| 5B_1 | 21637460 | IAAV5992                 | 27.0 | 0.0 | No  |
| 5B_1 | 40668413 | IACX10195                | 27.0 | 0.0 | No  |
| 5B_1 | 54769369 | Ku_c55173_549            | 27.0 | 0.0 | No  |
| 5B_1 | 15738345 | Kukri_c12910_214         | 27.0 | 0.0 | No  |
| 5B_1 | 66749385 | Kukri_c27720_274         | 27.0 | 0.0 | No  |
| 5B_1 | 19735394 | Kukri_c31599_1456        | 27.0 | 0.0 | No  |
| 5B_1 | 22646374 | Kukri_c8495_616          | 27.0 | 0.0 | No  |
| 5B_1 | 18650453 | RAC875_c28667_516        | 27.0 | 0.0 | No  |
| 5B_1 | 31729417 | RAC875_c3046_1764        | 27.0 | 0.0 | No  |
| 5B_1 | 25615358 | RAC875_c40254_116        | 27.0 | 0.0 | No  |
| 5B_1 | 34667451 | Tdurum_contig11228_274   | 27.0 | 0.0 | No  |
| 5B_1 | 16674320 | Tdurum_contig12995_722   | 27.0 | 0.0 | No  |
| 5B_1 | 53801487 | Tdurum_contig12995_792   | 27.0 | 0.0 | No  |
| 5B_1 | 36602321 | Tdurum_contig32812_255   | 27.0 | 0.0 | No  |
| 5B_1 | 28794420 | Tdurum_contig42008_7461  | 27.0 | 0.0 | No  |
| 5B_1 | 66632475 | Tdurum_contig44181_311   | 27.0 | 0.0 | No  |
| 5B_1 | 10803388 | Tdurum_contig44181_593   | 27.0 | 0.0 | No  |
| 5B_1 | 71600379 | Tdurum_contig44181_730   | 27.0 | 0.0 | No  |
| 5B_1 | 42663429 | Tdurum_contig58669_273   | 27.0 | 0.0 | No  |
| 5B_1 | 72694350 | wsnp_Ex_c17754_26503892  | 27.0 | 0.0 | No  |
| 5B_1 | 42653388 | wsnp_Ex_c27046_36265198  | 27.0 | 0.0 | No  |
| 5B_1 | 54675301 | wsnp_Ex_c33431_41918732  | 27.0 | 0.0 | No  |
| 5B_1 | 70779486 | wsnp_JD_c1358_1947464    | 27.0 | 0.0 | No  |
| 5B_1 | 50600341 | wsnp_JD_c1358_1947467    | 27.0 | 1.6 | No  |
| 5B_1 | 29807445 | BS00061326_51            | 28.5 | 0.0 | Yes |
| 5B_1 | 66618420 | BS00066345_51            | 28.5 | 0.0 | No  |
| 5B_1 | 14720425 | BS00073015_51            | 28.5 | 0.0 | No  |
| 5B_1 | 11748311 | RAC875_c103988_92        | 28.5 | 0.0 | No  |

|      |          |                        |      |     |     |
|------|----------|------------------------|------|-----|-----|
| 5B_1 | 12754339 | RAC875_c985_387        | 28.5 | 0.0 | No  |
| 5B_1 | 74790423 | Tdurum_contig44635_759 | 28.5 | 0.0 | No  |
| 5B_1 | 64633404 | wsnp_Ex_c2582_4804223  | 28.5 | 1.5 | No  |
| 5B_1 | 31801455 | BS00012038_51          | 30.1 | 0.0 | Yes |
| 5B_1 | 63790321 | BS00020982_51          | 30.1 | 0.0 | No  |
| 5B_1 | 45615342 | BS00049083_51          | 30.1 | 0.0 | No  |
| 5B_1 | 10789344 | BS00067841_51          | 30.1 | 0.0 | No  |
| 5B_1 | 69610452 | BS00068805_51          | 30.1 | 0.0 | No  |
| 5B_1 | 71623458 | BS00079316_51          | 30.1 | 0.0 | No  |
| 5B_1 | 32777370 | BS00087043_51          | 30.1 | 0.0 | No  |
| 5B_1 | 34720368 | BS00087696_51          | 30.1 | 0.0 | No  |
| 5B_1 | 54648403 | CAP12_c703_150         | 30.1 | 0.0 | No  |
| 5B_1 | 14719413 | CAP7_c12729_232        | 30.1 | 0.0 | No  |
| 5B_1 | 35724393 | Ex_c26924_745          | 30.1 | 0.0 | No  |
| 5B_1 | 74686309 | Excalibur_c33675_201   | 30.1 | 0.0 | No  |
| 5B_1 | 51726355 | Excalibur_c33675_410   | 30.1 | 0.0 | No  |
| 5B_1 | 46677498 | Excalibur_c52162_95    | 30.1 | 0.0 | No  |
| 5B_1 | 33661311 | Excalibur_c56310_57    | 30.1 | 0.0 | No  |
| 5B_1 | 44730498 | GENE-3383_162          | 30.1 | 0.0 | No  |
| 5B_1 | 55791362 | GENE-3383_710          | 30.1 | 0.0 | No  |
| 5B_1 | 42801420 | IAAV2426               | 30.1 | 0.0 | No  |
| 5B_1 | 42652408 | Jagger_c8122_111       | 30.1 | 0.0 | No  |
| 5B_1 | 53637370 | Kukri_c35352_483       | 30.1 | 0.0 | No  |
| 5B_1 | 54718460 | Kukri_c37692_347       | 30.1 | 0.0 | No  |
| 5B_1 | 35636374 | Kukri_c94990_140       | 30.1 | 0.0 | No  |
| 5B_1 | 16673420 | RAC875_c10139_92       | 30.1 | 0.0 | No  |
| 5B_1 | 43683433 | RAC875_c23289_303      | 30.1 | 0.0 | No  |
| 5B_1 | 67684366 | RAC875_c32320_88       | 30.1 | 0.0 | No  |
| 5B_1 | 42801364 | RAC875_c36779_148      | 30.1 | 0.0 | No  |
| 5B_1 | 20639404 | RAC875_c41100_175      | 30.1 | 0.0 | No  |
| 5B_1 | 23610443 | RAC875_c42281_475      | 30.1 | 0.0 | No  |
| 5B_1 | 71720461 | RAC875_c68413_74       | 30.1 | 0.0 | No  |
| 5B_1 | 59675303 | RAC875_c8757_589       | 30.1 | 0.0 | No  |
| 5B_1 | 70648502 | RAC875_c91986_410      | 30.1 | 0.0 | No  |
| 5B_1 | 66769418 | Tdurum_contig10210_428 | 30.1 | 0.0 | No  |
| 5B_1 | 36775457 | Tdurum_contig31075_260 | 30.1 | 0.0 | No  |
| 5B_1 | 51766305 | Tdurum_contig61623_129 | 30.1 | 0.0 | No  |
| 5B_1 | 66745365 | Tdurum_contig61623_570 | 30.1 | 0.0 | No  |
| 5B_1 | 58810450 | Tdurum_contig63272_105 | 30.1 | 0.0 | No  |
| 5B_1 | 60639416 | Tdurum_contig63997_587 | 30.1 | 0.0 | No  |
| 5B_1 | 15650409 | wsnp_Ex_c1838_3461594  | 30.1 | 0.0 | No  |
| 5B_1 | 49737469 | wsnp_Ku_c3294_6125586  | 30.1 | 0.0 | No  |
| 5B_1 | 60745421 | BS00099782_51          | 30.1 | 0.1 | Yes |
| 5B_1 | 28610379 | BS00017264_51          | 30.2 | 0.6 | Yes |

|      |          |                          |      |     |     |
|------|----------|--------------------------|------|-----|-----|
| 5B_1 | 30613337 | RAC875_c41057_202        | 30.9 | 1.0 | Yes |
| 5B_1 | 32797469 | Tdurum_contig50581_125   | 31.9 | 0.0 | Yes |
| 5B_1 | 63709362 | Tdurum_contig50581_379   | 31.9 | 7.5 | No  |
| 5B_1 | 73716353 | BobWhite_c48435_165      | 39.4 | 0.0 | Yes |
| 5B_1 | 25727419 | BS00010590_51            | 39.4 | 0.0 | No  |
| 5B_1 | 30656336 | Ex_c13277_2025           | 39.4 | 0.0 | No  |
| 5B_1 | 46652323 | Excalibur_c37642_1416    | 39.4 | 0.0 | No  |
| 5B_1 | 56732361 | GENE-3198_56             | 39.4 | 0.0 | No  |
| 5B_1 | 69657432 | Kukri_c17396_2448        | 39.4 | 0.0 | No  |
| 5B_1 | 17803405 | Kukri_c54078_114         | 39.4 | 0.0 | No  |
| 5B_1 | 14658370 | Kukri_c90424_72          | 39.4 | 0.0 | No  |
| 5B_1 | 26680348 | Kukri_rep_c113115_261    | 39.4 | 0.0 | No  |
| 5B_1 | 12792318 | Kukri_rep_c113115_424    | 39.4 | 0.0 | No  |
| 5B_1 | 67650433 | Ra_c38583_333            | 39.4 | 0.0 | No  |
| 5B_1 | 29805367 | Tdurum_contig12066_126   | 39.4 | 0.0 | No  |
| 5B_1 | 70620409 | Tdurum_contig12066_247   | 39.4 | 0.0 | No  |
| 5B_1 | 48799302 | Tdurum_contig25513_123   | 39.4 | 0.0 | No  |
| 5B_1 | 33741393 | Tdurum_contig25513_195   | 39.4 | 0.0 | No  |
| 5B_1 | 24619331 | Tdurum_contig57027_347   | 39.4 | 0.0 | No  |
| 5B_1 | 19735355 | tplb0027f13_1346         | 39.4 | 0.0 | No  |
| 5B_1 | 53713377 | tplb0027f13_1493         | 39.4 | 0.0 | No  |
| 5B_1 | 63752461 | wsnp_Ex_c13277_20936069  | 39.4 | 0.0 | No  |
| 5B_1 | 25657344 | wsnp_Ku_c40334_48581010  | 39.4 | 1.4 | No  |
| 5B_1 | 21619364 | wsnp_Ku_c3102_5810751    | 40.8 | 0.0 | Yes |
| 5B_1 | 15610394 | wsnp_Ku_c3102_5811860    | 40.8 | 1.1 | No  |
| 5B_1 | wPt-0498 | wPt-0498                 | 41.8 |     | Yes |
| 5B_2 | 46758315 | BS00068592_51            | 0.0  | 3.2 | Yes |
| 5B_2 | 35728444 | BS00035899_51            | 3.2  | 0.0 | Yes |
| 5B_2 | 49717383 | BS00063423_51            | 3.2  | 0.0 | No  |
| 5B_2 | 43674468 | wsnp_Ku_c28245_38183393  | 3.2  | 0.9 | No  |
| 5B_2 | 60606440 | Excalibur_rep_c70353_160 | 4.2  | 0.0 | Yes |
| 5B_2 | 35795366 | wsnp_Ku_c28491_38419391  | 4.2  | 0.0 | Yes |
| 5B_2 | 44644327 | BobWhite_c36054_53       | 4.2  | 0.0 | Yes |
| 5B_2 | 11629416 | BS00002208_51            | 4.2  | 0.0 | No  |
| 5B_2 | 16769311 | BS00023803_51            | 4.2  | 0.0 | No  |
| 5B_2 | 65711461 | BS00067072_51            | 4.2  | 0.0 | No  |
| 5B_2 | 28677460 | BS00089969_51            | 4.2  | 0.0 | No  |
| 5B_2 | 27721412 | BS00108062_51            | 4.2  | 0.0 | No  |
| 5B_2 | 10639315 | CAP12_c182_72            | 4.2  | 0.0 | No  |
| 5B_2 | 41790360 | Excalibur_c33031_1755    | 4.2  | 0.0 | No  |
| 5B_2 | 29633430 | IAAV850                  | 4.2  | 0.0 | No  |
| 5B_2 | 21703483 | IACX4548                 | 4.2  | 0.0 | No  |
| 5B_2 | 30801455 | IACX6007                 | 4.2  | 0.0 | No  |
| 5B_2 | 62758432 | Jagger_c505_141          | 4.2  | 0.0 | No  |

|      |          |                         |     |     |    |
|------|----------|-------------------------|-----|-----|----|
| 5B_2 | 36654403 | Ku_c33217_323           | 4.2 | 0.0 | No |
| 5B_2 | 53698365 | Ku_c6193_821            | 4.2 | 0.0 | No |
| 5B_2 | 73616329 | Kukri_c12490_766        | 4.2 | 0.0 | No |
| 5B_2 | 46606364 | Kukri_c13224_551        | 4.2 | 0.0 | No |
| 5B_2 | 15711439 | Kukri_c16197_1315       | 4.2 | 0.0 | No |
| 5B_2 | 52805327 | Kukri_c28117_583        | 4.2 | 0.0 | No |
| 5B_2 | 65803450 | Kukri_c40388_844        | 4.2 | 0.0 | No |
| 5B_2 | 19761409 | Kukri_c49151_139        | 4.2 | 0.0 | No |
| 5B_2 | 12754500 | Kukri_c73901_100        | 4.2 | 0.0 | No |
| 5B_2 | 15719356 | Kukri_c8428_403         | 4.2 | 0.0 | No |
| 5B_2 | 25625465 | Kukri_rep_c113387_369   | 4.2 | 0.0 | No |
| 5B_2 | 34650318 | RAC875_c103701_126      | 4.2 | 0.0 | No |
| 5B_2 | 10661349 | RAC875_c18048_105       | 4.2 | 0.0 | No |
| 5B_2 | 37766301 | RAC875_c29431_1849      | 4.2 | 0.0 | No |
| 5B_2 | 18637319 | RAC875_c378_310         | 4.2 | 0.0 | No |
| 5B_2 | 39739441 | RAC875_c51478_173       | 4.2 | 0.0 | No |
| 5B_2 | 43686414 | RAC875_c96137_101       | 4.2 | 0.0 | No |
| 5B_2 | 20688366 | RAC875_rep_c105322_99   | 4.2 | 0.0 | No |
| 5B_2 | 31798434 | RAC875_rep_c112125_305  | 4.2 | 0.0 | No |
| 5B_2 | 66624445 | RAC875_rep_c71474_66    | 4.2 | 0.0 | No |
| 5B_2 | 28692439 | RFL_Contig3811_3709     | 4.2 | 0.0 | No |
| 5B_2 | 59727411 | TA004005-0934           | 4.2 | 0.0 | No |
| 5B_2 | 41654426 | TA005344-0744           | 4.2 | 0.0 | No |
| 5B_2 | 73761454 | Tdurum_contig10191_996  | 4.2 | 0.0 | No |
| 5B_2 | 56713510 | Tdurum_contig10358_176  | 4.2 | 0.0 | No |
| 5B_2 | 16617438 | Tdurum_contig11649_320  | 4.2 | 0.0 | No |
| 5B_2 | 27644485 | Tdurum_contig11757_575  | 4.2 | 0.0 | No |
| 5B_2 | 57688462 | Tdurum_contig14784_676  | 4.2 | 0.0 | No |
| 5B_2 | 52685505 | Tdurum_contig16751_309  | 4.2 | 0.0 | No |
| 5B_2 | 57631370 | Tdurum_contig17230_619  | 4.2 | 0.0 | No |
| 5B_2 | 13650307 | Tdurum_contig25393_218  | 4.2 | 0.0 | No |
| 5B_2 | 26718478 | Tdurum_contig25393_269  | 4.2 | 0.0 | No |
| 5B_2 | 42793501 | Tdurum_contig28408_340  | 4.2 | 0.0 | No |
| 5B_2 | 21742447 | Tdurum_contig30065_537  | 4.2 | 0.0 | No |
| 5B_2 | 62767477 | Tdurum_contig30729_263  | 4.2 | 0.0 | No |
| 5B_2 | 10602366 | Tdurum_contig31131_198  | 4.2 | 0.0 | No |
| 5B_2 | 44665419 | Tdurum_contig354_149    | 4.2 | 0.0 | No |
| 5B_2 | 20620445 | Tdurum_contig42527_298  | 4.2 | 0.0 | No |
| 5B_2 | 12772406 | Tdurum_contig43677_338  | 4.2 | 0.0 | No |
| 5B_2 | 21657463 | Tdurum_contig46366_913  | 4.2 | 0.0 | No |
| 5B_2 | 20712393 | Tdurum_contig48658_1022 | 4.2 | 0.0 | No |
| 5B_2 | 31601475 | Tdurum_contig48658_794  | 4.2 | 0.0 | No |
| 5B_2 | 62610328 | Tdurum_contig48658_802  | 4.2 | 0.0 | No |
| 5B_2 | 49753321 | Tdurum_contig52439_196  | 4.2 | 0.0 | No |

|      |          |                              |     |     |     |
|------|----------|------------------------------|-----|-----|-----|
| 5B_2 | 65718405 | Tdurum_contig53235_475       | 4.2 | 0.0 | No  |
| 5B_2 | 17685505 | Tdurum_contig56973_413       | 4.2 | 0.0 | No  |
| 5B_2 | 11768418 | Tdurum_contig65246_303       | 4.2 | 0.0 | No  |
| 5B_2 | 12766372 | Tdurum_contig78069_514       | 4.2 | 0.0 | No  |
| 5B_2 | 40714352 | Tdurum_contig84745_267       | 4.2 | 0.0 | No  |
| 5B_2 | 42765404 | Tdurum_contig93270_1008      | 4.2 | 0.0 | No  |
| 5B_2 | 54672332 | Tdurum_contig98095_134       | 4.2 | 0.0 | No  |
| 5B_2 | 21748335 | Tdurum_contig99185_460       | 4.2 | 0.0 | No  |
| 5B_2 | 59780374 | wsnp_BE497820B_Ta_2_3        | 4.2 | 0.0 | No  |
| 5B_2 | 51728393 | wsnp_BQ166999B_Ta_2_1        | 4.2 | 0.0 | No  |
| 5B_2 | 26639381 | wsnp_CAP11_rep_c8668_3741698 | 4.2 | 0.0 | No  |
| 5B_2 | 63629486 | wsnp_Ex_c11275_18229524      | 4.2 | 0.0 | No  |
| 5B_2 | 26717484 | wsnp_Ex_c43518_49814933      | 4.2 | 0.0 | No  |
| 5B_2 | 14733485 | wsnp_Ex_c6100_10676217       | 4.2 | 0.0 | No  |
| 5B_2 | 67665307 | wsnp_Ex_c7483_12800686       | 4.2 | 0.0 | No  |
| 5B_2 | 29671414 | wsnp_Ex_c765_1506774         | 4.2 | 0.0 | No  |
| 5B_2 | 15711363 | wsnp_Ex_c8985_14979134       | 4.2 | 0.0 | No  |
| 5B_2 | 55685347 | wsnp_Ex_rep_c66651_64962429  | 4.2 | 0.0 | No  |
| 5B_2 | 59667334 | wsnp_Ex_rep_c66651_64963120  | 4.2 | 0.0 | No  |
| 5B_2 | 23796432 | wsnp_Ex_rep_c66921_65344887  | 4.2 | 0.0 | No  |
| 5B_2 | 55687436 | wsnp_Ku_c11721_19085513      | 4.2 | 0.0 | No  |
| 5B_2 | 73600441 | wsnp_Ku_c11980_19464222      | 4.2 | 0.0 | No  |
| 5B_2 | 15805376 | wsnp_Ku_c14332_22613741      | 4.2 | 0.0 | No  |
| 5B_2 | 29677414 | wsnp_Ku_c15630_24304828      | 4.2 | 0.0 | No  |
| 5B_2 | 43629326 | wsnp_Ku_c15630_24304954      | 4.2 | 0.0 | No  |
| 5B_2 | 13690397 | wsnp_Ku_c20701_30355248      | 4.2 | 0.0 | No  |
| 5B_2 | 64701311 | wsnp_Ku_c6464_11320381       | 4.2 | 0.0 | No  |
| 5B_2 | 46767300 | wsnp_Ra_c31894_40964279      | 4.2 | 0.0 | No  |
| 5B_2 | 57809388 | wsnp_RFL_Contig4574_5416228  | 4.2 | 0.6 | No  |
| 5B_2 | 12603491 | BobWhite_c10954_467          | 4.8 | 0.0 | Yes |
| 5B_2 | 55744499 | BobWhite_c15585_87           | 4.8 | 0.0 | No  |
| 5B_2 | 43703376 | BobWhite_c17133_107          | 4.8 | 0.0 | No  |
| 5B_2 | 69670434 | BobWhite_c17133_595          | 4.8 | 0.0 | No  |
| 5B_2 | 56749301 | BobWhite_c5564_86            | 4.8 | 0.0 | No  |
| 5B_2 | 54770377 | BS00041079_51                | 4.8 | 0.0 | No  |
| 5B_2 | 34774494 | D_contig19092_316            | 4.8 | 0.0 | No  |
| 5B_2 | 69687424 | Ex_c1846_1818                | 4.8 | 0.0 | No  |
| 5B_2 | 57693492 | Excalibur_c17843_812         | 4.8 | 0.0 | No  |
| 5B_2 | 62622382 | Excalibur_c38701_537         | 4.8 | 0.0 | No  |
| 5B_2 | 56806432 | Excalibur_c5540_1197         | 4.8 | 0.0 | No  |
| 5B_2 | 68745320 | IAAV2507                     | 4.8 | 0.0 | No  |
| 5B_2 | 32809331 | IAAV4252                     | 4.8 | 0.0 | No  |
| 5B_2 | 48678439 | Ku_c439_1308                 | 4.8 | 0.0 | No  |
| 5B_2 | 43808467 | Kukri_c10512_427             | 4.8 | 0.0 | No  |

|      |                          |                              |      |      |     |
|------|--------------------------|------------------------------|------|------|-----|
| 5B_2 | 58699420                 | Kukri_rep_c106411_137        | 4.8  | 0.0  | No  |
| 5B_2 | 47671446                 | Kukri_rep_c106665_549        | 4.8  | 0.0  | No  |
| 5B_2 | 20730307                 | RAC875_c2440_755             | 4.8  | 0.0  | No  |
| 5B_2 | 12643304                 | TA003794-1077                | 4.8  | 0.0  | No  |
| 5B_2 | 56675339                 | Tdurum_contig28482_427       | 4.8  | 0.0  | No  |
| 5B_2 | 52685441                 | Tdurum_contig44130_228       | 4.8  | 0.0  | No  |
| 5B_2 | 10623492                 | Tdurum_contig4708_1648       | 4.8  | 0.0  | No  |
| 5B_2 | 49637400                 | Tdurum_contig4708_684        | 4.8  | 0.0  | No  |
| 5B_2 | 56788498                 | Tdurum_contig62320_141       | 4.8  | 0.0  | No  |
| 5B_2 | 41623489                 | wsnp_CAP7_c3386_1586636      | 4.8  | 0.0  | No  |
| 5B_2 | 23764319                 | wsnp_CAP8_c2693_1401039      | 4.8  | 0.0  | No  |
| 5B_2 | 72804304                 | wsnp_Ex_c1498_2868339        | 4.8  | 0.0  | No  |
| 5B_2 | 41614361                 | wsnp_Ex_c5915_10378807       | 4.8  | 0.0  | No  |
| 5B_2 | 40670460                 | wsnp_Ex_rep_c103024_88075650 | 4.8  | 0.0  | No  |
| 5B_2 | 71633310                 | wsnp_Ex_rep_c68091_66846454  | 4.8  | 0.0  | No  |
| 5B_2 | 61610355                 | wsnp_Ku_c14252_22506286      | 4.8  | 0.0  | No  |
| 5B_2 | 61675430                 | wsnp_Ku_c27243_37190781      | 4.8  | 0.0  | No  |
| 5B_2 | 41681500                 | wsnp_Ku_c48254_54492007      | 4.8  | 1.0  | No  |
| 5B_2 | 14650319                 | GENE-3101_854                | 5.8  | 0.0  | Yes |
| 5B_2 | 62803335                 | IAAV5469                     | 5.8  | 0.0  | No  |
| 5B_2 | 57636315                 | Kukri_c22967_1272            | 5.8  | 0.0  | No  |
| 5B_2 | 49786476                 | RFL_Contig3192_1291          | 5.8  | 0.0  | No  |
| 5B_2 | 31673329                 | wsnp_Ex_rep_c75281_72691359  | 5.8  | 0.0  | No  |
| 5B_2 | 70742342                 | wsnp_RFL_Contig4565_5399994  | 5.8  | 1.7  | No  |
| 5B_2 | <a href="#">wPt-6902</a> | <a href="#">wPt-6902</a>     | 7.5  | 10.8 | Yes |
| 5B_2 | <a href="#">wPt-1261</a> | <a href="#">wPt-1261</a>     | 18.3 | 1.2  | Yes |
| 5B_2 | 74804315                 | Excalibur_c40676_447         | 19.5 | 0.0  | Yes |
| 5B_2 | 32602303                 | Kukri_c25747_894             | 19.5 | 0.0  | No  |
| 5B_2 | 51608479                 | Kukri_c37603_123             | 19.5 | 0.0  | No  |
| 5B_2 | 68603378                 | Tdurum_contig71099_245       | 19.5 | 0.0  | No  |
| 5B_2 | 48654384                 | wsnp_BE499835B_Ta_2_5        | 19.5 | 0.0  | No  |
| 5B_2 | 15732497                 | wsnp_BF201102B_Ta_2_1        | 19.5 | 0.0  | No  |
| 5B_2 | 50617403                 | Tdurum_contig9387_219        | 19.6 | 1.4  | Yes |
| 5B_2 | 66682425                 | BS00065543_51                | 20.9 | 0.0  | Yes |
| 5B_2 | 42778506                 | CAP12_c6289_70               | 20.9 | 0.0  | No  |
| 5B_2 | 16653360                 | Excalibur_c11605_156         | 20.9 | 0.0  | No  |
| 5B_2 | 70655326                 | Excalibur_c30273_138         | 20.9 | 0.0  | No  |
| 5B_2 | 10712498                 | GENE-3207_134                | 20.9 | 0.0  | No  |
| 5B_2 | 44642444                 | GENE-3207_610                | 20.9 | 0.0  | No  |
| 5B_2 | 23704491                 | Kukri_c23694_370             | 20.9 | 0.0  | No  |
| 5B_2 | 51766508                 | RAC875_c22387_117            | 20.9 | 0.0  | No  |
| 5B_2 | 40769453                 | RAC875_c54904_460            | 20.9 | 0.0  | No  |
| 5B_2 | 26775464                 | wsnp_Ex_rep_c110196_92676847 | 20.9 | 0.0  | No  |
| 5B_2 | 29696464                 | wsnp_JD_c4559_5692668        | 20.9 | 2.1  | No  |

|      |          |                              |      |     |     |
|------|----------|------------------------------|------|-----|-----|
| 5B_2 | wPt-3931 | wPt-3931                     | 23.0 | 7.1 | Yes |
| 5B_2 | 60738428 | IAAV731                      | 30.2 | 0.0 | Yes |
| 5B_2 | 32674430 | Tdurum_contig53796_360       | 30.2 | 0.0 | No  |
| 5B_2 | 63743350 | Tdurum_contig8695_379        | 30.2 | 0.0 | No  |
| 5B_2 | 20795408 | Tdurum_contig9291_438        | 30.2 | 0.0 | No  |
| 5B_2 | 60727362 | Tdurum_contig9291_553        | 30.2 | 0.0 | No  |
| 5B_2 | 25638301 | Tdurum_contig9291_744        | 30.2 | 0.9 | No  |
| 5B_2 | 34780347 | wsnp_Ku_c10586_17464696      | 31.1 | 0.6 | Yes |
| 5B_2 | 64683488 | BobWhite_c26680_62           | 31.7 | 0.0 | Yes |
| 5B_2 | 14643453 | BS00022525_51                | 31.7 | 0.0 | No  |
| 5B_2 | 64604429 | BS00063476_51                | 31.7 | 0.0 | No  |
| 5B_2 | 14795396 | BS00083715_51                | 31.7 | 0.0 | No  |
| 5B_2 | 12679365 | Excalibur_c74858_243         | 31.7 | 0.0 | No  |
| 5B_2 | 52728334 | Excalibur_rep_c102143_58     | 31.7 | 0.0 | No  |
| 5B_2 | 13660346 | Excalibur_rep_c110121_63     | 31.7 | 0.0 | No  |
| 5B_2 | 12752381 | Kukri_c25201_305             | 31.7 | 0.0 | No  |
| 5B_2 | 67750473 | Kukri_c37061_649             | 31.7 | 0.0 | No  |
| 5B_2 | 57603410 | RAC875_c28831_558            | 31.7 | 0.0 | No  |
| 5B_2 | 59665445 | RFL_Contig1899_2863          | 31.7 | 0.0 | No  |
| 5B_2 | 11810411 | Tdurum_contig14130_245       | 31.7 | 0.0 | No  |
| 5B_2 | 15736438 | Tdurum_contig14130_315       | 31.7 | 0.0 | No  |
| 5B_2 | 65735414 | wsnp_Ex_c2459_4591587        | 31.7 | 0.0 | No  |
| 5B_2 | 35784435 | wsnp_Ex_c33932_42333941      | 31.7 | 0.0 | No  |
| 5B_2 | 67624371 | wsnp_Ex_c56629_58677561      | 31.7 | 0.0 | No  |
| 5B_2 | 22770452 | wsnp_Ex_rep_c68504_67334656  | 31.7 | 0.0 | No  |
| 5B_2 | 47686481 | wsnp_Ku_rep_c103274_90057407 | 31.7 | 5.8 | No  |
| 5B_2 | 43603363 | BobWhite_c23714_130          | 37.5 | 0.0 | Yes |
| 5B_2 | 49602302 | BS00003643_51                | 37.5 | 0.0 | No  |
| 5B_2 | 70605484 | BS00010153_51                | 37.5 | 0.0 | No  |
| 5B_2 | 32745425 | BS00022115_51                | 37.5 | 0.0 | No  |
| 5B_2 | 13781404 | BS00024992_51                | 37.5 | 0.0 | No  |
| 5B_2 | 55761423 | BS00024993_51                | 37.5 | 0.0 | No  |
| 5B_2 | 71759490 | BS00060650_51                | 37.5 | 0.0 | No  |
| 5B_2 | 58760471 | BS00064297_51                | 37.5 | 0.0 | No  |
| 5B_2 | 10734479 | BS00064298_51                | 37.5 | 0.0 | No  |
| 5B_2 | 65635360 | BS00067985_51                | 37.5 | 0.0 | No  |
| 5B_2 | 54785392 | BS00079166_51                | 37.5 | 0.0 | No  |
| 5B_2 | 72676414 | BS00102828_51                | 37.5 | 0.0 | No  |
| 5B_2 | 42733454 | Excalibur_c25026_175         | 37.5 | 0.0 | No  |
| 5B_2 | 37665487 | Excalibur_c32189_941         | 37.5 | 0.0 | No  |
| 5B_2 | 41674311 | Excalibur_c32189_998         | 37.5 | 0.0 | No  |
| 5B_2 | 58679300 | Excalibur_c6967_1233         | 37.5 | 0.0 | No  |
| 5B_2 | 22683365 | Excalibur_c6967_1852         | 37.5 | 0.0 | No  |
| 5B_2 | 28601335 | Excalibur_c6967_553          | 37.5 | 0.0 | No  |



|      |          |                              |      |     |     |
|------|----------|------------------------------|------|-----|-----|
| 5B_2 | 38714363 | IACX5872                     | 37.5 | 0.0 | No  |
| 5B_2 | 35618330 | Kukri_c14683_65              | 37.5 | 0.0 | No  |
| 5B_2 | 73617495 | Kukri_c60115_164             | 37.5 | 0.0 | No  |
| 5B_2 | 16705506 | Kukri_c65921_274             | 37.5 | 0.0 | No  |
| 5B_2 | 37737380 | Kukri_rep_c70770_1937        | 37.5 | 0.0 | No  |
| 5B_2 | 16739423 | RFL_Contig4979_865           | 37.5 | 0.0 | No  |
| 5B_2 | 16755350 | RFL_Contig4979_965           | 37.5 | 0.0 | No  |
| 5B_2 | 21673349 | tplb0060p09_735              | 37.5 | 0.0 | No  |
| 5B_2 | 68769300 | wsnp_CAP11_rep_c4382_2067038 | 37.5 | 1.8 | No  |
| 5B_2 | wPt-1302 | wPt-1302                     | 39.3 |     | Yes |
| 5B_3 | wPt-0295 | wPt-0295                     | 0.0  | 2.3 | Yes |
| 5B_3 | wPt-0054 | wPt-0054                     | 2.3  | 1.2 | Yes |
| 5B_3 | 28716332 | Excalibur_c2207_1060         | 3.5  | 0.0 | Yes |
| 5B_3 | 15619460 | Excalibur_c47234_1012        | 3.5  | 0.0 | No  |
| 5B_3 | 53672473 | Kukri_c3734_400              | 3.5  | 0.0 | No  |
| 5B_3 | 47621357 | Kukri_c3734_438              | 3.5  | 0.0 | No  |
| 5B_3 | 44680307 | Kukri_c46310_84              | 3.5  | 0.0 | No  |
| 5B_3 | 11724498 | Kukri_c55885_110             | 3.5  | 0.0 | No  |
| 5B_3 | 29616467 | Kukri_c55885_139             | 3.5  | 0.0 | No  |
| 5B_3 | 15748378 | Kukri_c637_1679              | 3.5  | 0.0 | No  |
| 5B_3 | 54775396 | Kukri_c637_517               | 3.5  | 0.0 | No  |
| 5B_3 | 40784490 | Kukri_c637_583               | 3.5  | 0.0 | No  |
| 5B_3 | 39667351 | Kukri_c637_827               | 3.5  | 0.0 | No  |
| 5B_3 | 63655503 | Kukri_c637_974               | 3.5  | 0.0 | No  |
| 5B_3 | 18657304 | RAC875_rep_c105927_650       | 3.5  | 0.0 | No  |
| 5B_3 | 66772337 | tplb0048o03_953              | 3.5  | 0.0 | No  |
| 5B_3 | 71800312 | wsnp_Ex_c2207_4135530        | 3.5  | 0.0 | No  |
| 5B_3 | 45767369 | wsnp_Ex_c2207_4136036        | 3.5  | 0.0 | No  |
| 5B_3 | 52768307 | wsnp_Ku_c16116_24914891      | 3.5  | 0.0 | No  |
| 5B_3 | 27753465 | wsnp_Ku_c16116_24914991      | 3.5  | 1.4 | No  |
| 5B_3 | 15680482 | Ex_c34486_581                | 4.9  | 0.0 | Yes |
| 5B_3 | 58682336 | Excalibur_c71602_420         | 4.9  | 0.0 | Yes |
| 5B_3 | 17605488 | Excalibur_c71602_591         | 4.9  | 0.0 | No  |
| 5B_3 | 58689332 | Excalibur_c86388_413         | 4.9  | 0.0 | No  |
| 5B_3 | 36613388 | Excalibur_c96435_216         | 4.9  | 0.0 | No  |
| 5B_3 | 63693508 | Kukri_c21384_1758            | 4.9  | 1.3 | No  |
| 5B_3 | 40606486 | Tdurum_contig93435_1096      | 6.2  | 0.0 | Yes |
| 5B_3 | 10721350 | BobWhite_c31_3667            | 6.2  | 0.0 | Yes |
| 5B_3 | 22755487 | BobWhite_c31_2478            | 6.2  | 0.0 | Yes |
| 5B_3 | 48608497 | D_contig01224_479            | 6.2  | 0.0 | No  |
| 5B_3 | 49784494 | Excalibur_c31364_298         | 6.2  | 0.0 | No  |
| 5B_3 | 62703417 | Kukri_c5318_380              | 6.2  | 0.0 | No  |
| 5B_3 | 60726451 | RAC875_rep_c106589_784       | 6.2  | 0.0 | No  |
| 5B_3 | 49693412 | RAC875_rep_c69613_547        | 6.2  | 0.0 | No  |

|      |                          |                          |      |      |     |
|------|--------------------------|--------------------------|------|------|-----|
| 5B_3 | 72635468                 | Tdurum_contig28552_211   | 6.2  | 0.0  | No  |
| 5B_3 | 25716491                 | Tdurum_contig28552_88    | 6.2  | 0.0  | No  |
| 5B_3 | 36669355                 | Tdurum_contig43552_666   | 6.2  | 0.0  | No  |
| 5B_3 | 22681352                 | Tdurum_contig51416_414   | 6.2  | 0.0  | No  |
| 5B_3 | 13751405                 | Tdurum_contig54787_576   | 6.2  | 0.0  | No  |
| 5B_3 | 71635326                 | Tdurum_contig54787_931   | 6.2  | 0.0  | No  |
| 5B_3 | 17617427                 | Tdurum_contig92922_58    | 6.2  | 0.0  | No  |
| 5B_3 | 37626468                 | Tdurum_contig9749_66     | 6.2  | 11.0 | No  |
| 5B_3 | 54802470                 | Excalibur_c28091_279     | 17.2 | 3.9  | Yes |
| 5B_3 | <a href="#">wPt-4091</a> | <a href="#">wPt-4091</a> | 21.1 | 2.6  | Yes |
| 5B_3 | <a href="#">wPt-5118</a> | <a href="#">wPt-5118</a> | 23.7 | 0.6  | Yes |
| 5B_3 | 16601306                 | BS00068775_51            | 24.4 | 0.0  | Yes |
| 5B_3 | 54767467                 | BS00098432_51            | 24.4 | 0.0  | No  |
| 5B_3 | 31647398                 | D_contig61362_644        | 24.4 | 0.0  | No  |
| 5B_3 | 67726383                 | Excalibur_c146_170       | 24.4 | 0.0  | No  |
| 5B_3 | 28767366                 | Excalibur_c23433_338     | 24.4 | 0.0  | No  |
| 5B_3 | 55659386                 | Excalibur_c23801_115     | 24.4 | 0.0  | No  |
| 5B_3 | 63787425                 | Excalibur_c5055_1160     | 24.4 | 0.0  | No  |
| 5B_3 | 30767482                 | Excalibur_c6346_266      | 24.4 | 0.0  | No  |
| 5B_3 | 64607483                 | Kukri_c18410_193         | 24.4 | 0.0  | No  |
| 5B_3 | 38649476                 | Kukri_c18410_349         | 24.4 | 0.0  | No  |
| 5B_3 | 10681310                 | Kukri_c18410_409         | 24.4 | 0.0  | No  |
| 5B_3 | 54709458                 | Kukri_c84307_76          | 24.4 | 0.0  | No  |
| 5B_3 | 20643407                 | RAC875_c35495_796        | 24.4 | 0.0  | No  |
| 5B_3 | 61806355                 | RAC875_c82589_246        | 24.4 | 0.0  | No  |
| 5B_3 | 23728504                 | Tdurum_contig11758_295   | 24.4 | 0.0  | No  |
| 5B_3 | 31633355                 | Tdurum_contig60189_855   | 24.4 | 0.0  | No  |
| 5B_3 | 48674305                 | Tdurum_contig66604_927   | 24.4 | 0.0  | No  |
| 5B_3 | 27624367                 | BS00068776_51            | 24.4 | 1.4  | Yes |
| 5B_3 | 22701360                 | Tdurum_contig28868_84    | 25.8 | 0.0  | Yes |
| 5B_3 | 62683390                 | Tdurum_contig59965_403   | 25.8 | 0.0  | No  |
| 5B_3 | 19650432                 | Tdurum_contig59965_563   | 25.8 | 1.5  | No  |
| 5B_3 | 38704367                 | BS00013077_51            | 27.3 | 0.0  | Yes |
| 5B_3 | 31721471                 | CAP11_c2765_78           | 27.3 | 0.0  | No  |
| 5B_3 | 16640308                 | Tdurum_contig59631_198   | 27.3 | 0.0  | No  |
| 5B_3 | 44666327                 | Tdurum_contig59631_417   | 27.3 | 3.0  | No  |
| 5B_3 | 69737452                 | BS00060460_51            | 30.3 | 0.0  | Yes |
| 5B_3 | 51678437                 | BS00031338_51            | 30.4 | 0.0  | Yes |
| 5B_3 | 37759483                 | BS00031339_51            | 30.4 | 0.0  | No  |
| 5B_3 | 66707439                 | BS00097029_51            | 30.4 | 0.0  | No  |
| 5B_3 | 50761436                 | BS00097030_51            | 30.4 | 0.0  | No  |
| 5B_3 | 74722398                 | Ex_c20024_1452           | 30.4 | 0.0  | No  |
| 5B_3 | 55762343                 | Ex_c20606_800            | 30.4 | 0.0  | No  |
| 5B_3 | 41803310                 | Excalibur_c20024_806     | 30.4 | 0.0  | No  |

|      |           |                         |      |     |     |
|------|-----------|-------------------------|------|-----|-----|
| 5B_3 | 11685462  | Excalibur_c20606_871    | 30.4 | 0.0 | No  |
| 5B_3 | 10681381  | Excalibur_c2618_1412    | 30.4 | 0.0 | No  |
| 5B_3 | 30661474  | Excalibur_c2618_1723    | 30.4 | 0.0 | No  |
| 5B_3 | 58731494  | Excalibur_c63110_92     | 30.4 | 0.0 | No  |
| 5B_3 | 11663477  | IAAV1981                | 30.4 | 0.0 | No  |
| 5B_3 | 69733364  | Kukri_c52425_198        | 30.4 | 0.0 | No  |
| 5B_3 | 73690472  | RAC875_c20429_101       | 30.4 | 0.0 | No  |
| 5B_3 | 14666390  | RAC875_c20429_421       | 30.4 | 0.0 | No  |
| 5B_3 | 74753411  | Tdurum_contig13965_1223 | 30.4 | 0.0 | No  |
| 5B_3 | 35609320  | Tdurum_contig13965_452  | 30.4 | 0.0 | No  |
| 5B_3 | 61636447  | Tdurum_contig29123_351  | 30.4 | 0.0 | No  |
| 5B_3 | 69683331  | Tdurum_contig84832_110  | 30.4 | 0.0 | No  |
| 5B_3 | 74605493  | Tdurum_contig97942_163  | 30.4 | 0.0 | No  |
| 5B_3 | 28687303  | Tdurum_contig97942_51   | 30.4 | 0.8 | No  |
| 5B_3 | 35714398  | BobWhite_c7818_278      | 31.2 | 0.0 | Yes |
| 5B_3 | 16639325  | BS00090411_51           | 31.2 | 0.8 | No  |
| 5B_3 | wPt-6971  | wPt-6971                | 32.0 | 3.3 | Yes |
| 5B_3 | wPt-7665  | wPt-7665                | 35.3 | 0.0 | Yes |
| 5B_3 | wPt-11557 | wPt-11557               | 35.3 |     | Yes |
| 6A_1 | 61755380  | RAC875_c52504_215       | 0.0  | 3.5 | Yes |
| 6A_1 | wPt-8833  | wPt-8833                | 3.5  | 0.9 | Yes |
| 6A_1 | wPt-2563  | wPt-2563                | 4.4  | 0.0 | Yes |
| 6A_1 | wPt-0139  | wPt-0139                | 4.4  | 1.2 | No  |
| 6A_1 | wPt-7445  | wPt-7445                | 5.5  | 0.0 | Yes |
| 6A_1 | 23770349  | GENE-4099_228           | 5.6  | 0.1 | Yes |
| 6A_1 | 60707487  | BobWhite_c10740_179     | 5.6  | 0.0 | Yes |
| 6A_1 | 47781300  | BobWhite_c15870_540     | 5.6  | 0.0 | No  |
| 6A_1 | 17682332  | BobWhite_c27216_137     | 5.6  | 0.0 | No  |
| 6A_1 | 10621452  | BS00023140_51           | 5.6  | 0.0 | No  |
| 6A_1 | 37772311  | BS00066661_51           | 5.6  | 0.0 | No  |
| 6A_1 | 47707338  | BS00076530_51           | 5.6  | 0.0 | No  |
| 6A_1 | 46742492  | BS00091666_51           | 5.6  | 0.0 | No  |
| 6A_1 | 38661500  | BS00091668_51           | 5.6  | 0.0 | No  |
| 6A_1 | 26678504  | BS00109886_51           | 5.6  | 0.0 | No  |
| 6A_1 | 17746350  | BS00110316_51           | 5.6  | 0.0 | No  |
| 6A_1 | 26687437  | CAP7_rep_c13246_103     | 5.6  | 0.0 | No  |
| 6A_1 | 15807504  | CAP8_c3629_486          | 5.6  | 0.0 | No  |
| 6A_1 | 65705408  | Excalibur_c1708_1975    | 5.6  | 0.0 | No  |
| 6A_1 | 74785356  | Excalibur_c17274_263    | 5.6  | 0.0 | No  |
| 6A_1 | 26601489  | Excalibur_c25211_828    | 5.6  | 0.0 | No  |
| 6A_1 | 43747366  | Excalibur_c60006_452    | 5.6  | 0.0 | No  |
| 6A_1 | 72602460  | Excalibur_c60006_83     | 5.6  | 0.0 | No  |
| 6A_1 | 71770479  | Excalibur_c77210_167    | 5.6  | 0.0 | No  |

|      |          |                         |     |     |    |
|------|----------|-------------------------|-----|-----|----|
| 6A_1 | 44606323 | GENE-1530_1075          | 5.6 | 0.0 | No |
| 6A_1 | 44689472 | GENE-1530_263           | 5.6 | 0.0 | No |
| 6A_1 | 61664486 | IAAV7349                | 5.6 | 0.0 | No |
| 6A_1 | 65747381 | IAAV7418                | 5.6 | 0.0 | No |
| 6A_1 | 69712354 | IACX3415                | 5.6 | 0.0 | No |
| 6A_1 | 22727355 | IACX8337                | 5.6 | 0.0 | No |
| 6A_1 | 29743371 | Ku_c37893_495           | 5.6 | 0.0 | No |
| 6A_1 | 70602362 | Kukri_c18486_347        | 5.6 | 0.0 | No |
| 6A_1 | 31681334 | Kukri_c2357_152         | 5.6 | 0.0 | No |
| 6A_1 | 11713464 | Kukri_c264_438          | 5.6 | 0.0 | No |
| 6A_1 | 38772458 | Kukri_c264_539          | 5.6 | 0.0 | No |
| 6A_1 | 37659360 | Kukri_c35661_63         | 5.6 | 0.0 | No |
| 6A_1 | 74715380 | Kukri_rep_c104648_439   | 5.6 | 0.0 | No |
| 6A_1 | 23785416 | Kukri_rep_c113626_110   | 5.6 | 0.0 | No |
| 6A_1 | 13762313 | RAC875_c1215_1525       | 5.6 | 0.0 | No |
| 6A_1 | 45785402 | RAC875_c23490_622       | 5.6 | 0.0 | No |
| 6A_1 | 41635392 | RAC875_c34617_143       | 5.6 | 0.0 | No |
| 6A_1 | 14773430 | RAC875_c47243_145       | 5.6 | 0.0 | No |
| 6A_1 | 52659311 | RAC875_rep_c106439_1097 | 5.6 | 0.0 | No |
| 6A_1 | 48765385 | RAC875_rep_c108445_772  | 5.6 | 0.0 | No |
| 6A_1 | 43620473 | TA001668-0792           | 5.6 | 0.0 | No |
| 6A_1 | 49622421 | TA004624-0679           | 5.6 | 0.0 | No |
| 6A_1 | 15682336 | TA005058-0493           | 5.6 | 0.0 | No |
| 6A_1 | 69672505 | Tdurum_contig102404_127 | 5.6 | 0.0 | No |
| 6A_1 | 36777326 | Tdurum_contig102404_298 | 5.6 | 0.0 | No |
| 6A_1 | 55801300 | Tdurum_contig17950_455  | 5.6 | 0.0 | No |
| 6A_1 | 69667371 | Tdurum_contig25770_254  | 5.6 | 0.0 | No |
| 6A_1 | 56690306 | Tdurum_contig25770_308  | 5.6 | 0.0 | No |
| 6A_1 | 29775390 | Tdurum_contig25841_178  | 5.6 | 0.0 | No |
| 6A_1 | 48641499 | Tdurum_contig29033_75   | 5.6 | 0.0 | No |
| 6A_1 | 43687309 | Tdurum_contig33286_221  | 5.6 | 0.0 | No |
| 6A_1 | 25642388 | Tdurum_contig33313_101  | 5.6 | 0.0 | No |
| 6A_1 | 11733392 | Tdurum_contig42015_2187 | 5.6 | 0.0 | No |
| 6A_1 | 10692492 | Tdurum_contig42729_242  | 5.6 | 0.0 | No |
| 6A_1 | 64785360 | Tdurum_contig42729_380  | 5.6 | 0.0 | No |
| 6A_1 | 28777469 | Tdurum_contig42729_433  | 5.6 | 0.0 | No |
| 6A_1 | 19694442 | Tdurum_contig42906_732  | 5.6 | 0.0 | No |
| 6A_1 | 53697412 | Tdurum_contig47463_615  | 5.6 | 0.0 | No |
| 6A_1 | 46719385 | Tdurum_contig51780_159  | 5.6 | 0.0 | No |
| 6A_1 | 58691417 | Tdurum_contig61934_167  | 5.6 | 0.0 | No |
| 6A_1 | 24668309 | Tdurum_contig61934_60   | 5.6 | 0.0 | No |
| 6A_1 | 33606405 | Tdurum_contig62141_295  | 5.6 | 0.0 | No |
| 6A_1 | 29773398 | Tdurum_contig62141_496  | 5.6 | 0.0 | No |
| 6A_1 | 54653416 | Tdurum_contig62141_93   | 5.6 | 0.0 | No |

|      |                          |                             |      |     |     |
|------|--------------------------|-----------------------------|------|-----|-----|
| 6A_1 | 55807428                 | Tdurum_contig64407_187      | 5.6  | 0.0 | No  |
| 6A_1 | 50787420                 | Tdurum_contig64407_219      | 5.6  | 0.0 | No  |
| 6A_1 | 36753334                 | Tdurum_contig64407_297      | 5.6  | 0.0 | No  |
| 6A_1 | 13743395                 | Tdurum_contig64854_527      | 5.6  | 0.0 | No  |
| 6A_1 | 49662503                 | Tdurum_contig75292_933      | 5.6  | 0.0 | No  |
| 6A_1 | 27633454                 | Tdurum_contig9544_2126      | 5.6  | 0.0 | No  |
| 6A_1 | 45717497                 | Tdurum_contig9544_2233      | 5.6  | 0.0 | No  |
| 6A_1 | 64765333                 | Tdurum_contig9544_675       | 5.6  | 0.0 | No  |
| 6A_1 | 73648376                 | Tdurum_contig9544_978       | 5.6  | 0.0 | No  |
| 6A_1 | 34769343                 | tplb0048b19_119             | 5.6  | 0.0 | No  |
| 6A_1 | 47649468                 | wsnp_BQ167224A_Ta_2_1       | 5.6  | 0.0 | No  |
| 6A_1 | 72656304                 | wsnp_Ex_c17575_26299925     | 5.6  | 0.0 | No  |
| 6A_1 | 26789399                 | wsnp_Ex_c17575_26300030     | 5.6  | 0.0 | No  |
| 6A_1 | 67706475                 | wsnp_Ex_c31149_39975724     | 5.6  | 0.0 | No  |
| 6A_1 | 42772374                 | wsnp_Ex_c31149_39975883     | 5.6  | 0.0 | No  |
| 6A_1 | 57624462                 | wsnp_Ex_c31149_39976066     | 5.6  | 0.0 | No  |
| 6A_1 | 16646472                 | wsnp_Ex_c42945_49390254     | 5.6  | 0.0 | No  |
| 6A_1 | 15767315                 | wsnp_Ex_rep_c67468_66068537 | 5.6  | 0.0 | No  |
| 6A_1 | 14624397                 | wsnp_Ex_rep_c67468_66068960 | 5.6  | 0.0 | No  |
| 6A_1 | 70730334                 | wsnp_RFL_Contig3759_4027999 | 5.6  | 0.3 | No  |
| 6A_1 | <a href="#">wPt-7599</a> | <a href="#">wPt-7599</a>    | 5.9  | 0.7 | Yes |
| 6A_1 | <a href="#">wPt-0357</a> | <a href="#">wPt-0357</a>    | 6.5  | 1.3 | Yes |
| 6A_1 | 56615458                 | Kukri_c38599_63             | 7.9  | 0.0 | Yes |
| 6A_1 | 63773396                 | Kukri_c39863_225            | 7.9  | 2.7 | No  |
| 6A_1 | 11672462                 | BS00063990_51               | 10.6 | 0.0 | Yes |
| 6A_1 | 20750365                 | Excalibur_c9713_371         | 10.6 | 0.0 | No  |
| 6A_1 | 17690316                 | JD_c2846_753                | 10.6 | 0.0 | No  |
| 6A_1 | 21614384                 | Tdurum_contig51862_864      | 10.6 | 0.0 | No  |
| 6A_1 | 69610500                 | Tdurum_contig64047_213      | 10.6 | 0.0 | No  |
| 6A_1 | 53762463                 | Tdurum_contig64047_520      | 10.6 | 0.0 | No  |
| 6A_1 | 22789429                 | wsnp_JD_c2180_3000498       | 10.6 | 1.6 | No  |
| 6A_1 | 22612466                 | Tdurum_contig67686_633      | 12.2 | 1.0 | Yes |
| 6A_1 | 19644441                 | BobWhite_c4872_97           | 13.3 | 0.0 | Yes |
| 6A_1 | 61662360                 | BobWhite_c5782_825          | 13.3 | 0.0 | No  |
| 6A_1 | 56617324                 | BS00063296_51               | 13.3 | 0.0 | No  |
| 6A_1 | 49674371                 | BS00073124_51               | 13.3 | 0.0 | No  |
| 6A_1 | 37656394                 | Excalibur_c10263_218        | 13.3 | 0.0 | No  |
| 6A_1 | 30701428                 | IAAV4950                    | 13.3 | 0.0 | No  |
| 6A_1 | 10715321                 | Jagger_c2853_75             | 13.3 | 0.0 | No  |
| 6A_1 | 50694309                 | Tdurum_contig11413_700      | 13.3 | 0.0 | No  |
| 6A_1 | 65670452                 | Tdurum_contig11413_78       | 13.3 | 0.0 | No  |
| 6A_1 | 60794387                 | Tdurum_contig50698_250      | 13.3 | 0.0 | No  |
| 6A_1 | 14657335                 | Tdurum_contig58912_605      | 13.3 | 0.0 | No  |
| 6A_1 | 43632439                 | Tdurum_contig7557_723       | 13.3 | 0.0 | No  |

|      |          |                             |      |     |     |
|------|----------|-----------------------------|------|-----|-----|
| 6A_1 | 24614340 | Tdurum_contig92819_647      | 13.3 | 0.0 | No  |
| 6A_1 | 67772367 | wsnp_BE490604A_Ta_2_1       | 13.3 | 0.0 | No  |
| 6A_1 | 13690326 | wsnp_Ku_c26784_36748247     | 13.3 | 4.2 | No  |
| 6A_1 | 14662411 | BobWhite_c11312_346         | 17.4 | 0.0 | Yes |
| 6A_1 | 40810448 | BobWhite_c18017_209         | 17.4 | 0.0 | No  |
| 6A_1 | 56642495 | BobWhite_c23888_124         | 17.4 | 0.0 | No  |
| 6A_1 | 12754439 | BS00021747_51               | 17.4 | 0.0 | No  |
| 6A_1 | 63618429 | BS00023847_51               | 17.4 | 0.0 | No  |
| 6A_1 | 48709384 | BS00065851_51               | 17.4 | 0.0 | No  |
| 6A_1 | 46747504 | BS00072286_51               | 17.4 | 0.0 | No  |
| 6A_1 | 16624503 | BS00079942_51               | 17.4 | 0.0 | No  |
| 6A_1 | 64675414 | Excalibur_c61218_269        | 17.4 | 0.0 | No  |
| 6A_1 | 38618457 | Excalibur_rep_c82397_137    | 17.4 | 0.0 | No  |
| 6A_1 | 66679334 | GENE-3854_620               | 17.4 | 0.0 | No  |
| 6A_1 | 54605409 | IAAV8577                    | 17.4 | 0.0 | No  |
| 6A_1 | 61710390 | JD_c8888_741                | 17.4 | 0.0 | No  |
| 6A_1 | 10614354 | Kukri_c19338_413            | 17.4 | 0.0 | No  |
| 6A_1 | 51663388 | Kukri_c22149_276            | 17.4 | 0.0 | No  |
| 6A_1 | 55798326 | Kukri_c36476_559            | 17.4 | 0.0 | No  |
| 6A_1 | 19624426 | Kukri_rep_c68344_627        | 17.4 | 0.0 | No  |
| 6A_1 | 72649431 | RAC875_c28637_1004          | 17.4 | 0.0 | No  |
| 6A_1 | 54667316 | RAC875_c33523_648           | 17.4 | 0.0 | No  |
| 6A_1 | 23734508 | RAC875_c49875_405           | 17.4 | 0.0 | No  |
| 6A_1 | 68646384 | RAC875_c60695_112           | 17.4 | 0.0 | No  |
| 6A_1 | 61708323 | RAC875_rep_c73850_589       | 17.4 | 0.0 | No  |
| 6A_1 | 37686426 | RAC875_rep_c81239_73        | 17.4 | 0.0 | No  |
| 6A_1 | 31712474 | Tdurum_contig16290_156      | 17.4 | 0.0 | No  |
| 6A_1 | 29690461 | Tdurum_contig17126_1477     | 17.4 | 0.0 | No  |
| 6A_1 | 29742500 | Tdurum_contig42084_811      | 17.4 | 0.0 | No  |
| 6A_1 | 66801487 | Tdurum_contig48870_249      | 17.4 | 0.0 | No  |
| 6A_1 | 58701385 | Tdurum_contig55124_310      | 17.4 | 0.0 | No  |
| 6A_1 | 52773489 | Tdurum_contig70820_833      | 17.4 | 0.0 | No  |
| 6A_1 | 72740486 | wsnp_CAP7_c1839_907899      | 17.4 | 0.0 | No  |
| 6A_1 | 66668338 | wsnp_CAP7_c1839_908011      | 17.4 | 0.0 | No  |
| 6A_1 | 35649370 | wsnp_CAP7_c1839_908093      | 17.4 | 0.0 | No  |
| 6A_1 | 37707344 | wsnp_Ex_c10087_16579529     | 17.4 | 0.0 | No  |
| 6A_1 | 54721339 | wsnp_Ex_c12141_19415226     | 17.4 | 0.0 | No  |
| 6A_1 | 49739503 | wsnp_Ex_c14192_22135363     | 17.4 | 0.0 | No  |
| 6A_1 | 70630443 | wsnp_Ex_c14192_22135384     | 17.4 | 0.0 | No  |
| 6A_1 | 13661498 | wsnp_Ex_rep_c66433_64661643 | 17.4 | 0.0 | No  |
| 6A_1 | 26762321 | wsnp_Ex_rep_c66433_64662690 | 17.4 | 1.5 | No  |
| 6A_1 | 49662344 | Ku_c11950_931               | 18.9 | 1.2 | Yes |
| 6A_1 | 23669340 | Tdurum_contig10412_469      | 20.1 | 0.0 | Yes |
| 6A_1 | 42760463 | Tdurum_contig10412_650      | 20.1 | 1.3 | No  |

|      |                          |                              |      |     |     |
|------|--------------------------|------------------------------|------|-----|-----|
| 6A_1 | 30600447                 | Tdurum_contig42318_1372      | 21.5 | 1.4 | Yes |
| 6A_1 | 37622412                 | Tdurum_contig45504_166       | 22.9 | 2.3 | Yes |
| 6A_1 | 33656377                 | BS00010576_51                | 25.2 | 0.0 | Yes |
| 6A_1 | 49781460                 | Excalibur_rep_c68125_1097    | 25.2 | 0.0 | No  |
| 6A_1 | 32759502                 | Kukri_c14877_303             | 25.2 | 0.0 | No  |
| 6A_1 | 37675408                 | Kukri_c31048_186             | 25.2 | 0.0 | No  |
| 6A_1 | 64670433                 | Kukri_c4750_452              | 25.2 | 0.0 | No  |
| 6A_1 | 67798495                 | TA005759-0353                | 25.2 | 0.0 | No  |
| 6A_1 | 35617482                 | Tdurum_contig10205_807       | 25.2 | 0.0 | No  |
| 6A_1 | 51720318                 | Tdurum_contig10622_799       | 25.2 | 0.0 | No  |
| 6A_1 | 55736439                 | Tdurum_contig12033_275       | 25.2 | 0.0 | No  |
| 6A_1 | 47601447                 | Tdurum_contig13680_134       | 25.2 | 0.0 | No  |
| 6A_1 | 26687465                 | Tdurum_contig29774_603       | 25.2 | 0.0 | No  |
| 6A_1 | 54740384                 | Tdurum_contig43479_952       | 25.2 | 0.0 | No  |
| 6A_1 | 65656442                 | Tdurum_contig59351_418       | 25.2 | 0.0 | No  |
| 6A_1 | 29693497                 | Tdurum_contig59351_490       | 25.2 | 0.0 | No  |
| 6A_1 | 31625341                 | Tdurum_contig59599_1213      | 25.2 | 0.0 | No  |
| 6A_1 | 57677381                 | Tdurum_contig75737_1479      | 25.2 | 0.0 | No  |
| 6A_1 | 66800425                 | Tdurum_contig83570_288       | 25.2 | 0.0 | No  |
| 6A_1 | 35648432                 | Tdurum_contig83933_258       | 25.2 | 0.0 | No  |
| 6A_1 | 23786453                 | Tdurum_contig8896_296        | 25.2 | 0.7 | No  |
| 6A_1 | 55631459                 | BS00021376_51                | 25.9 | 0.0 | Yes |
| 6A_1 | 36672383                 | BS00023092_51                | 25.9 | 0.0 | No  |
| 6A_1 | 68652406                 | BS00036878_51                | 25.9 | 0.0 | No  |
| 6A_1 | 50775444                 | BS00059860_51                | 25.9 | 0.0 | No  |
| 6A_1 | 39780478                 | Excalibur_c56264_188         | 25.9 | 0.0 | No  |
| 6A_1 | 23781401                 | IAAV7384                     | 25.9 | 0.0 | No  |
| 6A_1 | 10625381                 | RAC875_c7804_236             | 25.9 | 0.0 | No  |
| 6A_1 | 53614423                 | RAC875_rep_c72499_697        | 25.9 | 0.0 | No  |
| 6A_1 | 69782324                 | Tdurum_contig27441_373       | 25.9 | 0.0 | No  |
| 6A_1 | 33706338                 | Tdurum_contig47663_321       | 25.9 | 0.0 | No  |
| 6A_1 | 39711447                 | Tdurum_contig48357_329       | 25.9 | 0.0 | No  |
| 6A_1 | 66770382                 | Tdurum_contig53138_302       | 25.9 | 0.0 | No  |
| 6A_1 | 16764361                 | Tdurum_contig76709_195       | 25.9 | 0.0 | No  |
| 6A_1 | 14765378                 | Tdurum_contig78006_158       | 25.9 | 0.2 | No  |
| 6A_1 | 22604400                 | wsnp_Ku_rep_c112734_95776957 | 26.1 | 5.2 | Yes |
| 6A_1 | <a href="#">wPt-2465</a> | <a href="#">wPt-2465</a>     | 31.3 | 7.4 | Yes |
| 6A_1 | <a href="#">wPt-2077</a> | <a href="#">wPt-2077</a>     | 38.7 |     | Yes |
| 6A_2 | 11637384                 | BS00029127_51                | 0.0  | 0.0 | Yes |
| 6A_2 | 23661403                 | BS00096240_51                | 0.0  | 0.0 | No  |
| 6A_2 | 39609405                 | GENE-4028_111                | 0.0  | 0.0 | No  |
| 6A_2 | 18626359                 | Tdurum_contig51566_561       | 0.0  | 0.0 | No  |
| 6A_2 | 51633421                 | wsnp_BE489894A_Ta_2_1        | 0.0  | 0.0 | No  |
| 6A_2 | 59751365                 | wsnp_Ku_c28854_38769308      | 0.0  | 1.5 | No  |

|      |                          |                              |      |      |     |
|------|--------------------------|------------------------------|------|------|-----|
| 6A_2 | 24662474                 | BobWhite_c27145_318          | 1.5  | 0.0  | Yes |
| 6A_2 | 33703326                 | BobWhite_c27145_731          | 1.5  | 0.0  | No  |
| 6A_2 | 41698509                 | Tdurum_contig75700_411       | 1.5  | 1.5  | No  |
| 6A_2 | 67688322                 | Kukri_c57452_1040            | 3.0  | 0.0  | Yes |
| 6A_2 | 22627504                 | Kukri_rep_c95718_868         | 3.0  | 0.0  | No  |
| 6A_2 | 22698476                 | Ra_c3533_880                 | 3.0  | 0.0  | No  |
| 6A_2 | 69646316                 | RAC875_c103443_475           | 3.0  | 0.0  | No  |
| 6A_2 | 52685379                 | RAC875_rep_c74051_276        | 3.0  | 0.0  | No  |
| 6A_2 | 70774343                 | RFL_Contig1715_631           | 3.0  | 0.0  | No  |
| 6A_2 | 30750317                 | RFL_Contig6053_2072          | 3.0  | 0.0  | No  |
| 6A_2 | 15695493                 | RFL_Contig6053_3082          | 3.0  | 0.0  | No  |
| 6A_2 | 31674394                 | Tdurum_contig28802_213       | 3.0  | 0.0  | No  |
| 6A_2 | 57783484                 | wsnp_Ex_c20457_29526260      | 3.0  | 0.0  | No  |
| 6A_2 | 40647399                 | wsnp_Ex_c20457_29526403      | 3.0  | 0.0  | No  |
| 6A_2 | 46615369                 | wsnp_Ex_c2236_4189774        | 3.0  | 0.0  | No  |
| 6A_2 | 72722317                 | wsnp_Ex_c34597_42879693      | 3.0  | 0.0  | No  |
| 6A_2 | 19789442                 | wsnp_Ex_c34597_42879718      | 3.0  | 0.0  | No  |
| 6A_2 | 23658413                 | wsnp_Ex_c8510_14306239       | 3.0  | 0.0  | No  |
| 6A_2 | 48651392                 | wsnp_Ex_rep_c101766_87073440 | 3.0  | 11.7 | No  |
| 6A_2 | 22693435                 | Tdurum_contig92441_354       | 14.7 | 2.1  | Yes |
| 6A_2 | 10777324                 | Tdurum_contig14676_637       | 16.8 | 0.2  | Yes |
| 6A_2 | 48678361                 | Tdurum_contig62599_415       | 16.9 | 4.9  | Yes |
| 6A_2 | 39791473                 | BS00074024_51                | 21.9 | 0.0  | Yes |
| 6A_2 | 13693382                 | Excalibur_c33709_68          | 21.9 | 2.7  | No  |
| 6A_2 | 56661502                 | Ku_c604_705                  | 24.5 | 0.0  | Yes |
| 6A_2 | 11612455                 | RFL_Contig5314_1147          | 24.5 | 0.0  | No  |
| 6A_2 | 12643375                 | Tdurum_contig27888_760       | 24.5 | 0.0  | No  |
| 6A_2 | 25722415                 | Tdurum_contig30251_210       | 24.5 | 0.0  | No  |
| 6A_2 | 48746309                 | Tdurum_contig7464_1168       | 24.5 |      | No  |
| 6A_3 | <a href="#">wPt-0562</a> | <a href="#">wPt-0562</a>     | 0.0  | 0.0  | Yes |
| 6A_3 | <a href="#">rPt-9065</a> | <a href="#">rPt-9065</a>     | 0.0  | 1.2  | No  |
| 6A_3 | 44677388                 | JD_c23_3032                  | 1.2  | 0.5  | Yes |
| 6A_3 | 73647386                 | BobWhite_c4142_91            | 1.7  | 0.0  | Yes |
| 6A_3 | 71788457                 | BS00010657_51                | 1.7  | 0.0  | No  |
| 6A_3 | 59625343                 | BS00010922_51                | 1.7  | 0.0  | No  |
| 6A_3 | 46797463                 | BS00022481_51                | 1.7  | 0.0  | No  |
| 6A_3 | 13704432                 | BS00075409_51                | 1.7  | 0.0  | No  |
| 6A_3 | 73636486                 | Excalibur_c4789_2748         | 1.7  | 0.0  | No  |
| 6A_3 | 22633505                 | Kukri_c11737_1241            | 1.7  | 0.0  | No  |
| 6A_3 | 19742453                 | Kukri_c7146_870              | 1.7  | 0.0  | No  |
| 6A_3 | 17793437                 | RAC875_rep_c112205_166       | 1.7  | 0.0  | No  |
| 6A_3 | 46686409                 | TA002381-0322                | 1.7  | 0.0  | No  |
| 6A_3 | 45767484                 | Tdurum_contig27939_357       | 1.7  | 0.0  | No  |
| 6A_3 | 60704377                 | Tdurum_contig44853_1083      | 1.7  | 0.5  | No  |



|      |          |                             |     |     |     |
|------|----------|-----------------------------|-----|-----|-----|
| 6A_3 | 55787349 | BobWhite_c15802_72          | 2.3 | 0.0 | Yes |
| 6A_3 | 28624486 | BS00003632_51               | 2.3 | 0.0 | No  |
| 6A_3 | 74806438 | BS00012150_51               | 2.3 | 0.0 | No  |
| 6A_3 | 30708455 | BS00036635_51               | 2.3 | 0.0 | No  |
| 6A_3 | 32747347 | BS00063903_51               | 2.3 | 0.0 | No  |
| 6A_3 | 14704411 | BS00064449_51               | 2.3 | 0.0 | No  |
| 6A_3 | 16689320 | BS00064453_51               | 2.3 | 0.0 | No  |
| 6A_3 | 74806492 | BS00065069_51               | 2.3 | 0.0 | No  |
| 6A_3 | 74653443 | BS00066872_51               | 2.3 | 0.0 | No  |
| 6A_3 | 16784373 | BS00068515_51               | 2.3 | 0.0 | No  |
| 6A_3 | 55730325 | BS00091538_51               | 2.3 | 0.0 | No  |
| 6A_3 | 45801420 | BS00107760_51               | 2.3 | 0.0 | No  |
| 6A_3 | 40771408 | Excalibur_c13_1799          | 2.3 | 0.0 | No  |
| 6A_3 | 41608325 | Excalibur_c13115_348        | 2.3 | 0.0 | No  |
| 6A_3 | 52760357 | Excalibur_c2978_667         | 2.3 | 0.0 | No  |
| 6A_3 | 16702435 | GENE-0345_707               | 2.3 | 0.0 | No  |
| 6A_3 | 12617362 | IACX8154                    | 2.3 | 0.0 | No  |
| 6A_3 | 37733505 | Kukri_c102502_261           | 2.3 | 0.0 | No  |
| 6A_3 | 30659415 | Kukri_c2040_624             | 2.3 | 0.0 | No  |
| 6A_3 | 46665450 | Kukri_c37937_351            | 2.3 | 0.0 | No  |
| 6A_3 | 32734487 | Kukri_c38982_246            | 2.3 | 0.0 | No  |
| 6A_3 | 58781391 | Kukri_c38982_516            | 2.3 | 0.0 | No  |
| 6A_3 | 70742487 | Kukri_c49017_404            | 2.3 | 0.0 | No  |
| 6A_3 | 58704375 | Kukri_c6364_578             | 2.3 | 0.0 | No  |
| 6A_3 | 65805436 | Kukri_c93507_110            | 2.3 | 0.0 | No  |
| 6A_3 | 47749444 | Kukri_rep_c101465_416       | 2.3 | 0.0 | No  |
| 6A_3 | 69768348 | RAC875_c12835_1335          | 2.3 | 0.0 | No  |
| 6A_3 | 26632406 | RAC875_rep_c79566_238       | 2.3 | 0.0 | No  |
| 6A_3 | 18687503 | RFL_Contig1622_1433         | 2.3 | 0.0 | No  |
| 6A_3 | 44688444 | RFL_Contig1622_1825         | 2.3 | 0.0 | No  |
| 6A_3 | 31689326 | RFL_Contig1622_923          | 2.3 | 0.0 | No  |
| 6A_3 | 19711475 | TA001907-0759               | 2.3 | 0.0 | No  |
| 6A_3 | 35650496 | Tdurum_contig29823_88       | 2.3 | 0.0 | No  |
| 6A_3 | 57616448 | Tdurum_contig42405_114      | 2.3 | 0.0 | No  |
| 6A_3 | 62809396 | Tdurum_contig42405_197      | 2.3 | 0.0 | No  |
| 6A_3 | 30638347 | Tdurum_contig54957_525      | 2.3 | 0.0 | No  |
| 6A_3 | 10647346 | Tdurum_contig62593_410      | 2.3 | 0.0 | No  |
| 6A_3 | 52720372 | Tdurum_contig97611_150      | 2.3 | 0.0 | No  |
| 6A_3 | 51809440 | wsnp_CAP8_c6680_3136899     | 2.3 | 0.0 | No  |
| 6A_3 | 14777486 | wsnp_Ku_c16572_25480808     | 2.3 | 0.0 | No  |
| 6A_3 | 16668429 | wsnp_Ku_c20866_30535750     | 2.3 | 0.0 | No  |
| 6A_3 | 60727385 | wsnp_Ku_c7471_12865307      | 2.3 | 0.0 | No  |
| 6A_3 | 37789321 | wsnp_Ku_c7471_12865509      | 2.3 | 0.0 | No  |
| 6A_3 | 38624464 | wsnp_Ku_rep_c69659_69084797 | 2.3 | 0.0 | No  |

|      |          |                             |     |     |     |
|------|----------|-----------------------------|-----|-----|-----|
| 6A_3 | 49687499 | wsnp_Ku_rep_c69924_69422461 | 2.3 | 0.1 | No  |
| 6A_3 | 38627474 | Tdurum_contig61363_249      | 2.4 | 0.2 | Yes |
| 6A_3 | 29624478 | tplb0042b08_1432            | 2.6 | 0.2 | Yes |
| 6A_3 | 54752441 | BS00082191_51               | 2.7 | 0.4 | Yes |
| 6A_3 | 37639364 | BS00009514_51               | 3.2 | 0.0 | Yes |
| 6A_3 | 59781508 | RAC875_c35198_418           | 3.2 | 0.0 | Yes |
| 6A_3 | 16760367 | BobWhite_c32973_167         | 3.2 | 0.0 | Yes |
| 6A_3 | 22778344 | BobWhite_rep_c52979_181     | 3.2 | 0.0 | No  |
| 6A_3 | 27759335 | BS00030219_51               | 3.2 | 0.0 | No  |
| 6A_3 | 19739360 | BS00071573_51               | 3.2 | 0.0 | No  |
| 6A_3 | 59673431 | BS00093037_51               | 3.2 | 0.0 | No  |
| 6A_3 | 30680486 | D_GCE8AKX01D9GOJ_39         | 3.2 | 0.0 | No  |
| 6A_3 | 44638443 | Excalibur_c12085_276        | 3.2 | 0.0 | No  |
| 6A_3 | 18707510 | Excalibur_c15851_566        | 3.2 | 0.0 | No  |
| 6A_3 | 69760331 | Excalibur_c15851_590        | 3.2 | 0.0 | No  |
| 6A_3 | 17637400 | Excalibur_c21794_383        | 3.2 | 0.0 | No  |
| 6A_3 | 31663508 | Excalibur_c431_1130         | 3.2 | 0.0 | No  |
| 6A_3 | 13756449 | Excalibur_c4483_1053        | 3.2 | 0.0 | No  |
| 6A_3 | 28796484 | Excalibur_c89674_134        | 3.2 | 0.0 | No  |
| 6A_3 | 62669444 | Kukri_c21384_1872           | 3.2 | 0.0 | No  |
| 6A_3 | 18645355 | Kukri_c3827_337             | 3.2 | 0.0 | No  |
| 6A_3 | 47646365 | Kukri_c39873_66             | 3.2 | 0.0 | No  |
| 6A_3 | 14671495 | Kukri_c9049_202             | 3.2 | 0.0 | No  |
| 6A_3 | 64659490 | Ra_c22493_190               | 3.2 | 0.0 | No  |
| 6A_3 | 19707376 | Ra_c22558_437               | 3.2 | 0.0 | No  |
| 6A_3 | 26714502 | Ra_c8975_168                | 3.2 | 0.0 | No  |
| 6A_3 | 31624383 | RAC875_c13610_2646          | 3.2 | 0.0 | No  |
| 6A_3 | 64628346 | RAC875_c23241_844           | 3.2 | 0.0 | No  |
| 6A_3 | 61608493 | RAC875_c67999_295           | 3.2 | 0.0 | No  |
| 6A_3 | 53715318 | RAC875_c68978_220           | 3.2 | 0.0 | No  |
| 6A_3 | 33789434 | RAC875_c6916_860            | 3.2 | 0.0 | No  |
| 6A_3 | 49670322 | RAC875_rep_c105500_301      | 3.2 | 0.0 | No  |
| 6A_3 | 36753351 | RAC875_rep_c108136_115      | 3.2 | 0.0 | No  |
| 6A_3 | 48798489 | TA002540-0938               | 3.2 | 0.0 | No  |
| 6A_3 | 21608320 | TA005787-0140               | 3.2 | 0.0 | No  |
| 6A_3 | 48627405 | Tdurum_contig12045_613      | 3.2 | 0.0 | No  |
| 6A_3 | 74772393 | Tdurum_contig12045_868      | 3.2 | 0.0 | No  |
| 6A_3 | 59626487 | Tdurum_contig12749_284      | 3.2 | 0.0 | No  |
| 6A_3 | 64695401 | Tdurum_contig63703_1305     | 3.2 | 0.0 | No  |
| 6A_3 | 49713311 | Tdurum_contig8345_1460      | 3.2 | 0.0 | No  |
| 6A_3 | 72722399 | wsnp_Ku_c39334_47795461     | 3.2 | 0.0 | No  |
| 6A_3 | 48681446 | wsnp_Ra_c3996_7334169       | 3.2 | 0.6 | No  |
| 6A_3 | 16697469 | BS00081603_51               | 3.8 | 0.0 | Yes |
| 6A_3 | 66675498 | RAC875_c16610_470           | 3.8 | 0.1 | No  |

|      |                          |                          |     |     |     |
|------|--------------------------|--------------------------|-----|-----|-----|
| 6A_3 | 63627352                 | BobWhite_rep_c65669_295  | 3.9 | 0.0 | Yes |
| 6A_3 | 67693457                 | BobWhite_rep_c65669_525  | 3.9 | 0.0 | No  |
| 6A_3 | 63778390                 | Kukri_rep_c116677_306    | 3.9 | 0.0 | No  |
| 6A_3 | 30799428                 | RFL_Contig2815_1764      | 3.9 | 0.0 | No  |
| 6A_3 | 20747502                 | Tdurum_contig44853_1539  | 3.9 | 0.0 | No  |
| 6A_3 | 21634385                 | wsnp_Ku_c26585_36553202  | 3.9 | 0.3 | No  |
| 6A_3 | 60649412                 | BS00074429_51            | 4.2 | 0.0 | Yes |
| 6A_3 | 14650444                 | BS00076455_51            | 4.2 | 0.0 | No  |
| 6A_3 | 20707360                 | BS00083630_51            | 4.2 | 0.0 | No  |
| 6A_3 | 36696397                 | IAAV9150                 | 4.2 | 0.0 | No  |
| 6A_3 | 67730387                 | Kukri_c3009_1702         | 4.2 | 0.0 | No  |
| 6A_3 | 31687303                 | Kukri_c3009_1822         | 4.2 | 0.0 | No  |
| 6A_3 | 28640361                 | Kukri_rep_c105406_308    | 4.2 | 0.0 | No  |
| 6A_3 | 37710307                 | RAC875_c4668_771         | 4.2 | 0.0 | No  |
| 6A_3 | 54742495                 | RAC875_rep_c70001_263    | 4.2 | 0.0 | No  |
| 6A_3 | 74707472                 | Tdurum_contig12749_255   | 4.2 | 0.0 | No  |
| 6A_3 | 63657379                 | Tdurum_contig55193_347   | 4.2 | 0.0 | No  |
| 6A_3 | 12737424                 | Tdurum_contig63703_1143  | 4.2 | 0.2 | No  |
| 6A_3 | <a href="#">wPt-9075</a> | <a href="#">wPt-9075</a> | 4.4 | 0.1 | Yes |
| 6A_3 | 35758486                 | IACX11098                | 4.4 | 0.0 | Yes |
| 6A_3 | 38698499                 | BS00003786_51            | 4.4 | 0.0 | Yes |
| 6A_3 | 55751303                 | BS00083640_51            | 4.4 | 0.0 | No  |
| 6A_3 | 70776317                 | BS00093317_51            | 4.4 | 0.0 | No  |
| 6A_3 | 27603446                 | Ex_c16090_1157           | 4.4 | 0.0 | No  |
| 6A_3 | 13603402                 | Excalibur_c27164_77      | 4.4 | 0.0 | No  |
| 6A_3 | 42770457                 | Excalibur_c31801_752     | 4.4 | 0.0 | No  |
| 6A_3 | 67764499                 | IAAV661                  | 4.4 | 0.0 | No  |
| 6A_3 | 23633462                 | Kukri_c143_1116          | 4.4 | 0.0 | No  |
| 6A_3 | 27787509                 | Kukri_c3009_1374         | 4.4 | 0.0 | No  |
| 6A_3 | 46746501                 | Kukri_c3009_157          | 4.4 | 0.0 | No  |
| 6A_3 | 62769392                 | Kukri_c6285_190          | 4.4 | 0.0 | No  |
| 6A_3 | 46702341                 | RFL_Contig5170_330       | 4.4 | 0.0 | No  |
| 6A_3 | 18619403                 | Tdurum_contig12045_1230  | 4.4 | 0.0 | No  |
| 6A_3 | 23642342                 | Tdurum_contig12045_246   | 4.4 | 0.0 | No  |
| 6A_3 | 55792403                 | Tdurum_contig12045_327   | 4.4 | 0.0 | No  |
| 6A_3 | 53728391                 | Tdurum_contig29878_59    | 4.4 | 0.0 | No  |
| 6A_3 | 21690381                 | Tdurum_contig63703_1237  | 4.4 | 0.3 | No  |
| 6A_3 | 43719439                 | IAAV8377                 | 4.8 | 0.2 | Yes |
| 6A_3 | 41781404                 | BobWhite_c5092_422       | 5.0 | 0.0 | Yes |
| 6A_3 | 42639465                 | BS00022032_51            | 5.0 | 0.0 | No  |
| 6A_3 | 42787319                 | BS00025560_51            | 5.0 | 0.0 | No  |
| 6A_3 | 29758465                 | BS00030455_51            | 5.0 | 0.0 | No  |
| 6A_3 | 32792374                 | BS00047085_51            | 5.0 | 0.0 | No  |
| 6A_3 | 22732436                 | BS00064730_51            | 5.0 | 0.0 | No  |

|      |          |                             |     |     |     |
|------|----------|-----------------------------|-----|-----|-----|
| 6A_3 | 65787459 | BS00096853_51               | 5.0 | 0.0 | No  |
| 6A_3 | 11604463 | BS00098857_51               | 5.0 | 0.0 | No  |
| 6A_3 | 32798333 | BS00105910_51               | 5.0 | 0.0 | No  |
| 6A_3 | 26746398 | BS00105913_51               | 5.0 | 0.0 | No  |
| 6A_3 | 64654340 | CAP7_rep_c5315_221          | 5.0 | 0.0 | No  |
| 6A_3 | 10724379 | Ex_c2978_643                | 5.0 | 0.0 | No  |
| 6A_3 | 46674508 | Ex_c3530_106                | 5.0 | 0.0 | No  |
| 6A_3 | 74657421 | Excalibur_c32710_68         | 5.0 | 0.0 | No  |
| 6A_3 | 41604302 | Excalibur_c4202_1326        | 5.0 | 0.0 | No  |
| 6A_3 | 45759509 | Jagger_c9118_62             | 5.0 | 0.0 | No  |
| 6A_3 | 50627510 | Kukri_c16030_275            | 5.0 | 0.0 | No  |
| 6A_3 | 47721361 | Kukri_c25244_199            | 5.0 | 0.0 | No  |
| 6A_3 | 26799419 | Kukri_rep_c69659_71         | 5.0 | 0.0 | No  |
| 6A_3 | 29626479 | Ra_c4286_1000               | 5.0 | 0.0 | No  |
| 6A_3 | 44623480 | RAC875_c28122_475           | 5.0 | 0.0 | No  |
| 6A_3 | 57631379 | RAC875_rep_c97032_73        | 5.0 | 0.0 | No  |
| 6A_3 | 47767438 | Tdurum_contig10580_316      | 5.0 | 0.0 | No  |
| 6A_3 | 28606470 | Tdurum_contig29823_203      | 5.0 | 0.0 | No  |
| 6A_3 | 43648417 | Tdurum_contig45243_188      | 5.0 | 0.0 | No  |
| 6A_3 | 17675413 | Tdurum_contig56431_637      | 5.0 | 0.0 | No  |
| 6A_3 | 35639332 | Tdurum_contig8849_343       | 5.0 | 0.0 | No  |
| 6A_3 | 65773443 | wsnp_Ex_c3530_6459532       | 5.0 | 0.0 | No  |
| 6A_3 | 15672408 | wsnp_Ex_c3530_6459643       | 5.0 | 0.0 | No  |
| 6A_3 | 24764396 | wsnp_Ex_rep_c68165_66935014 | 5.0 | 0.0 | No  |
| 6A_3 | 44619436 | wsnp_Ex_rep_c68165_66935041 | 5.0 | 0.0 | No  |
| 6A_3 | 39792333 | wsnp_Ex_rep_c68165_66935148 | 5.0 | 0.0 | No  |
| 6A_3 | 41652461 | wsnp_JD_c7718_8795833       | 5.0 | 0.0 | No  |
| 6A_3 | 24804448 | wsnp_Ku_c38351_47009610     | 5.0 | 0.3 | No  |
| 6A_3 | 44784388 | BobWhite_c13779_636         | 5.3 | 0.0 | Yes |
| 6A_3 | 20779375 | BobWhite_c15802_720         | 5.3 | 0.0 | No  |
| 6A_3 | 36797447 | BobWhite_c34318_375         | 5.3 | 0.0 | No  |
| 6A_3 | 50661359 | BobWhite_c6569_479          | 5.3 | 0.0 | No  |
| 6A_3 | 12734505 | BS00035056_51               | 5.3 | 0.0 | No  |
| 6A_3 | 51646364 | BS00035057_51               | 5.3 | 0.0 | No  |
| 6A_3 | 52791356 | BS00064485_51               | 5.3 | 0.0 | No  |
| 6A_3 | 22649431 | BS00067829_51               | 5.3 | 0.0 | No  |
| 6A_3 | 11755368 | CAP11_rep_c5191_192         | 5.3 | 0.0 | No  |
| 6A_3 | 55697331 | Excalibur_c18449_124        | 5.3 | 0.0 | No  |
| 6A_3 | 72803504 | Excalibur_c18449_304        | 5.3 | 0.0 | No  |
| 6A_3 | 52790321 | Excalibur_c38751_118        | 5.3 | 0.0 | No  |
| 6A_3 | 62646459 | Excalibur_c9048_1431        | 5.3 | 0.0 | No  |
| 6A_3 | 65604340 | Excalibur_c9779_465         | 5.3 | 0.0 | No  |
| 6A_3 | 70646423 | Kukri_c18361_614            | 5.3 | 0.0 | No  |
| 6A_3 | 41659365 | Kukri_c18361_650            | 5.3 | 0.0 | No  |

|      |          |                             |      |     |     |
|------|----------|-----------------------------|------|-----|-----|
| 6A_3 | 17800441 | Kukri_c21443_482            | 5.3  | 0.0 | No  |
| 6A_3 | 48732368 | Kukri_c38982_165            | 5.3  | 0.0 | No  |
| 6A_3 | 48732481 | Kukri_c38982_555            | 5.3  | 0.0 | No  |
| 6A_3 | 47786400 | Kukri_c6364_1243            | 5.3  | 0.0 | No  |
| 6A_3 | 51628387 | Kukri_c7508_805             | 5.3  | 0.0 | No  |
| 6A_3 | 34769390 | Kukri_rep_c102263_1262      | 5.3  | 0.0 | No  |
| 6A_3 | 50662372 | Kukri_rep_c110681_178       | 5.3  | 0.0 | No  |
| 6A_3 | 38724450 | RAC875_c106584_747          | 5.3  | 0.0 | No  |
| 6A_3 | 15685428 | RAC875_c2145_92             | 5.3  | 0.0 | No  |
| 6A_3 | 40626355 | RAC875_c29816_75            | 5.3  | 0.0 | No  |
| 6A_3 | 25749412 | RAC875_c38876_642           | 5.3  | 0.0 | No  |
| 6A_3 | 71652370 | TA001326-1839               | 5.3  | 0.0 | No  |
| 6A_3 | 70737320 | Tdurum_contig54957_624      | 5.3  | 0.0 | No  |
| 6A_3 | 10721322 | wsnp_Ex_c52849_56297163     | 5.3  | 0.0 | No  |
| 6A_3 | 29755387 | wsnp_Ex_c9779_16145653      | 5.3  | 0.0 | No  |
| 6A_3 | 18702464 | wsnp_Ku_c20866_30535489     | 5.3  | 0.0 | No  |
| 6A_3 | 12759300 | wsnp_Ku_rep_c71785_71517370 | 5.3  | 0.0 | No  |
| 6A_3 | 21693359 | wsnp_Ra_rep_c79566_75592262 | 5.3  | 1.0 | No  |
| 6A_3 | wPt-7330 | wPt-7330                    | 6.3  | 0.0 | Yes |
| 6A_3 | wPt-4016 | wPt-4016                    | 6.3  | 0.0 | Yes |
| 6A_3 | wPt-3468 | wPt-3468                    | 6.3  | 0.0 | Yes |
| 6A_3 | wPt-4017 | wPt-4017                    | 6.3  | 0.0 | Yes |
| 6A_3 | wPt-5395 | wPt-5395                    | 6.3  | 0.0 | Yes |
| 6A_3 | wPt-4270 | wPt-4270                    | 6.3  | 0.0 | Yes |
| 6A_3 | wPt-0864 | wPt-0864                    | 6.4  | 0.0 | Yes |
| 6A_3 | wPt-2636 | wPt-2636                    | 6.4  | 0.0 | No  |
| 6A_3 | wPt-6520 | wPt-6520                    | 6.4  | 0.0 | No  |
| 6A_3 | wPt-8006 | wPt-8006                    | 6.4  | 0.0 | No  |
| 6A_3 | wPt-7754 | wPt-7754                    | 6.4  | 0.4 | No  |
| 6A_3 | wPt-9280 | wPt-9280                    | 6.8  | 0.4 | Yes |
| 6A_3 | wPt-1742 | wPt-1742                    | 7.2  | 0.3 | Yes |
| 6A_3 | wPt-4589 | wPt-4589                    | 7.5  | 0.8 | Yes |
| 6A_3 | tPt-0877 | tPt-0877                    | 8.4  | 0.0 | Yes |
| 6A_3 | wPt-7663 | wPt-7663                    | 8.4  | 0.0 | No  |
| 6A_3 | wPt-8266 | wPt-8266                    | 8.4  | 0.0 | No  |
| 6A_3 | wPt-0689 | wPt-0689                    | 8.4  | 0.0 | No  |
| 6A_3 | tPt-2833 | tPt-2833                    | 8.4  | 0.0 | No  |
| 6A_3 | wPt-3524 | wPt-3524                    | 8.4  | 0.0 | Yes |
| 6A_3 | wPt-7027 | wPt-7027                    | 8.4  | 0.0 | Yes |
| 6A_3 | wPt-9679 | wPt-9679                    | 8.4  | 0.0 | No  |
| 6A_3 | wPt-6904 | wPt-6904                    | 8.4  | 0.7 | Yes |
| 6A_3 | wPt-5652 | wPt-5652                    | 9.1  | 0.2 | Yes |
| 6A_3 | wPt-7616 | wPt-7616                    | 9.3  | 0.8 | Yes |
| 6A_3 | wPt-8443 | wPt-8443                    | 10.0 | 2.6 | Yes |

|      |                          |                          |      |     |     |
|------|--------------------------|--------------------------|------|-----|-----|
| 6A_3 | 32777499                 | RAC875_c23552_811        | 12.7 | 0.6 | Yes |
| 6A_3 | 39771370                 | RAC875_s119505_143       | 13.3 |     | Yes |
| 6B   | <a href="#">wPt-3581</a> | <a href="#">wPt-3581</a> | 0.0  | 2.8 | Yes |
| 6B   | 42655436                 | Tdurum_contig31036_96    | 2.8  | 1.1 | Yes |
| 6B   | <a href="#">wPt-1730</a> | <a href="#">wPt-1730</a> | 4.0  | 0.4 | Yes |
| 6B   | 33682420                 | BobWhite_c22827_193      | 4.4  | 0.0 | Yes |
| 6B   | 49682429                 | BobWhite_c6950_269       | 4.4  | 0.0 | No  |
| 6B   | 22609391                 | BS00066253_51            | 4.4  | 0.0 | No  |
| 6B   | 18697383                 | CAP7_c5075_412           | 4.4  | 0.0 | No  |
| 6B   | 35689365                 | D_GBUVHFX02HQJ47_110     | 4.4  | 0.0 | No  |
| 6B   | 43706306                 | Excalibur_c4084_408      | 4.4  | 0.0 | No  |
| 6B   | 43616462                 | GENE-4204_311            | 4.4  | 0.0 | No  |
| 6B   | 10756454                 | Kukri_c61680_247         | 4.4  | 0.0 | No  |
| 6B   | 12612433                 | Tdurum_contig10567_644   | 4.4  | 0.0 | No  |
| 6B   | 42717496                 | Tdurum_contig44825_307   | 4.4  | 0.0 | No  |
| 6B   | 49713452                 | Tdurum_contig48727_691   | 4.4  | 0.0 | No  |
| 6B   | 43782449                 | Tdurum_contig53125_1716  | 4.4  | 0.0 | No  |
| 6B   | 60712486                 | Tdurum_contig57255_86    | 4.4  | 0.0 | No  |
| 6B   | 58719458                 | Tdurum_contig74717_297   | 4.4  | 0.0 | No  |
| 6B   | 72700385                 | Tdurum_contig74717_436   | 4.4  | 0.0 | No  |
| 6B   | 68785408                 | Tdurum_contig81463_185   | 4.4  | 0.0 | No  |
| 6B   | 34737496                 | Tdurum_contig94541_217   | 4.4  | 0.0 | No  |
| 6B   | 29622408                 | wsnp_BE490200B_Ta_2_1    | 4.4  | 0.0 | No  |
| 6B   | 63665503                 | wsnp_CAP11_c1432_806102  | 4.4  | 0.0 | No  |
| 6B   | 65740407                 | wsnp_CAP11_c2485_1280612 | 4.4  | 0.0 | No  |
| 6B   | 49639357                 | wsnp_Ex_c9750_16105678   | 4.4  | 1.4 | No  |
| 6B   | 22761316                 | RAC875_c6355_1709        | 5.8  | 0.1 | Yes |
| 6B   | 23696355                 | Tdurum_contig83473_341   | 5.8  | 0.0 | Yes |
| 6B   | 67684483                 | IACX415                  | 5.9  | 0.0 | Yes |
| 6B   | 50612308                 | Kukri_c65766_78          | 5.9  | 0.0 | No  |
| 6B   | 49697457                 | Kukri_rep_c107419_372    | 5.9  | 0.0 | No  |
| 6B   | 55634494                 | Tdurum_contig10499_1207  | 5.9  | 0.0 | No  |
| 6B   | 54635322                 | Tdurum_contig45353_547   | 5.9  | 0.0 | No  |
| 6B   | 73694315                 | Tdurum_contig47269_241   | 5.9  | 0.0 | No  |
| 6B   | 33664399                 | Tdurum_contig47269_904   | 5.9  | 0.0 | No  |
| 6B   | 48782392                 | Tdurum_contig54437_165   | 5.9  | 0.0 | No  |
| 6B   | 54775367                 | Tdurum_contig54437_377   | 5.9  | 0.0 | No  |
| 6B   | 59647454                 | Tdurum_contig55197_627   | 5.9  | 0.0 | No  |
| 6B   | 16627333                 | Tdurum_contig55197_680   | 5.9  | 0.0 | No  |
| 6B   | 67756473                 | Tdurum_contig55473_221   | 5.9  | 0.0 | No  |
| 6B   | 70642366                 | Tdurum_contig55473_381   | 5.9  | 0.0 | No  |
| 6B   | 72661306                 | Tdurum_contig55473_437   | 5.9  | 0.0 | No  |
| 6B   | 17641414                 | Tdurum_contig76550_1161  | 5.9  | 0.0 | No  |
| 6B   | 58749348                 | Tdurum_contig76550_1300  | 5.9  | 0.0 | No  |

|    |          |                          |      |     |     |
|----|----------|--------------------------|------|-----|-----|
| 6B | 34681326 | Tdurum_contig76550_1364  | 5.9  | 0.0 | No  |
| 6B | 60803379 | Tdurum_contig76550_500   | 5.9  | 0.0 | No  |
| 6B | 64712373 | Tdurum_contig76550_723   | 5.9  | 0.0 | No  |
| 6B | 26754390 | Tdurum_contig80294_434   | 5.9  | 0.0 | No  |
| 6B | 26755423 | wsnp_Ku_c16522_25425455  | 5.9  | 4.6 | No  |
| 6B | 48678460 | Excalibur_c21568_1462    | 10.5 | 0.0 | Yes |
| 6B | 37735385 | Excalibur_c21568_689     | 10.5 | 0.0 | No  |
| 6B | 23614356 | Excalibur_rep_c69660_398 | 10.5 | 1.5 | No  |
| 6B | 19633332 | Tdurum_contig29807_324   | 12.1 | 0.0 | Yes |
| 6B | 12703471 | Tdurum_contig48158_878   | 12.1 | 0.0 | No  |
| 6B | 44726410 | Tdurum_contig9531_176    | 12.1 | 1.5 | No  |
| 6B | 14782481 | BS00022192_51            | 13.6 | 0.0 | Yes |
| 6B | 62674383 | Tdurum_contig46965_1385  | 13.6 | 0.0 | No  |
| 6B | 66713326 | Tdurum_contig69600_415   | 13.6 | 1.5 | No  |
| 6B | 22798303 | Ex_c1145_552             | 15.0 | 0.0 | Yes |
| 6B | 14661506 | RAC875_c64560_111        | 15.0 | 0.0 | No  |
| 6B | 53623431 | wsnp_Ex_c1145_2198295    | 15.0 | 1.5 | No  |
| 6B | 29648476 | Tdurum_contig45370_704   | 16.6 | 0.0 | Yes |
| 6B | 49753330 | BobWhite_c27318_380      | 16.6 | 0.0 | Yes |
| 6B | 47763417 | BobWhite_c57109_169      | 16.6 | 0.0 | No  |
| 6B | 10659496 | BobWhite_c8571_699       | 16.6 | 0.0 | No  |
| 6B | 47671404 | BobWhite_rep_c63804_353  | 16.6 | 0.0 | No  |
| 6B | 27774428 | BS00010676_51            | 16.6 | 0.0 | No  |
| 6B | 37706367 | BS00049942_51            | 16.6 | 0.0 | No  |
| 6B | 67660491 | Excalibur_c30793_77      | 16.6 | 0.0 | No  |
| 6B | 50798463 | Excalibur_c6416_1712     | 16.6 | 0.0 | No  |
| 6B | 33679452 | Excalibur_c90130_313     | 16.6 | 0.0 | No  |
| 6B | 47793335 | GENE-0659_105            | 16.6 | 0.0 | No  |
| 6B | 27601454 | GENE-4048_299            | 16.6 | 0.0 | No  |
| 6B | 66675434 | GENE-4195_165            | 16.6 | 0.0 | No  |
| 6B | 58685491 | Jagger_c6357_245         | 16.6 | 0.0 | No  |
| 6B | 30780455 | Ku_c47744_1073           | 16.6 | 0.0 | No  |
| 6B | 57714443 | Kukri_c22032_619         | 16.6 | 0.0 | No  |
| 6B | 44774447 | Kukri_c63145_262         | 16.6 | 0.0 | No  |
| 6B | 74701467 | Kukri_rep_c105243_341    | 16.6 | 0.0 | No  |
| 6B | 32615498 | Ra_c26317_453            | 16.6 | 0.0 | No  |
| 6B | 33742314 | RAC875_c26887_562        | 16.6 | 0.0 | No  |
| 6B | 45653325 | RAC875_c63209_154        | 16.6 | 0.0 | No  |
| 6B | 49671400 | TA005016-0827            | 16.6 | 0.0 | No  |
| 6B | 63646369 | Tdurum_contig12089_821   | 16.6 | 0.0 | No  |
| 6B | 41685492 | Tdurum_contig29294_171   | 16.6 | 0.0 | No  |
| 6B | 61620368 | Tdurum_contig45370_324   | 16.6 | 0.0 | No  |
| 6B | 66697407 | Tdurum_contig45370_808   | 16.6 | 0.0 | No  |
| 6B | 17710453 | wsnp_Ex_c34011_42398362  | 16.6 | 0.0 | No  |

|    |          |                              |      |     |     |
|----|----------|------------------------------|------|-----|-----|
| 6B | 63653474 | wsnp_Ex_c4180_7550457        | 16.6 | 1.5 | No  |
| 6B | 65780418 | RAC875_c19649_848            | 18.1 | 0.0 | Yes |
| 6B | 45763383 | BobWhite_c23946_75           | 18.1 | 0.0 | Yes |
| 6B | 63774466 | BS00026203_51                | 18.1 | 0.0 | No  |
| 6B | 28745439 | BS00056278_51                | 18.1 | 0.0 | No  |
| 6B | 44782446 | BS00070668_51                | 18.1 | 0.0 | No  |
| 6B | 35758391 | BS00071912_51                | 18.1 | 0.0 | No  |
| 6B | 36662332 | BS00078932_51                | 18.1 | 0.0 | No  |
| 6B | 34804432 | BS00080317_51                | 18.1 | 0.0 | No  |
| 6B | 57612502 | BS00082760_51                | 18.1 | 0.0 | No  |
| 6B | 39705496 | BS00095516_51                | 18.1 | 0.0 | No  |
| 6B | 34773309 | BS00110920_51                | 18.1 | 0.0 | No  |
| 6B | 55607416 | D_GBB4FNX01BO9N8_336         | 18.1 | 0.0 | No  |
| 6B | 28758408 | Excalibur_c11726_1432        | 18.1 | 0.0 | No  |
| 6B | 32697505 | Excalibur_c15870_1331        | 18.1 | 0.0 | No  |
| 6B | 63712503 | Excalibur_c7823_397          | 18.1 | 0.0 | No  |
| 6B | 15665380 | Excalibur_rep_c84475_162     | 18.1 | 0.0 | No  |
| 6B | 36770423 | IAAV3811                     | 18.1 | 0.0 | No  |
| 6B | 63626461 | Jagger_c556_473              | 18.1 | 0.0 | No  |
| 6B | 16775430 | JD_c2691_2946                | 18.1 | 0.0 | No  |
| 6B | 32731415 | JD_c2691_2947                | 18.1 | 0.0 | No  |
| 6B | 13698358 | Ku_c1189_1439                | 18.1 | 0.0 | No  |
| 6B | 31671358 | Ku_c35629_568                | 18.1 | 0.0 | No  |
| 6B | 70703359 | Kukri_c10200_286             | 18.1 | 0.0 | No  |
| 6B | 62772378 | Kukri_c16877_142             | 18.1 | 0.0 | No  |
| 6B | 50694365 | Kukri_c31481_1478            | 18.1 | 0.0 | No  |
| 6B | 52637402 | Kukri_c55096_140             | 18.1 | 0.0 | No  |
| 6B | 40668488 | Kukri_rep_c68962_1971        | 18.1 | 0.0 | No  |
| 6B | 12692444 | Ra_c26497_381                | 18.1 | 0.0 | No  |
| 6B | 19740480 | Ra_c44817_353                | 18.1 | 0.0 | No  |
| 6B | 35672405 | RAC875_c32137_751            | 18.1 | 0.0 | No  |
| 6B | 44620312 | RAC875_c34604_142            | 18.1 | 0.0 | No  |
| 6B | 51808373 | RAC875_c7110_2706            | 18.1 | 0.0 | No  |
| 6B | 40704345 | RAC875_c90029_92             | 18.1 | 0.0 | No  |
| 6B | 42718447 | Tdurum_contig13162_61        | 18.1 | 0.0 | No  |
| 6B | 39708425 | Tdurum_contig31386_195       | 18.1 | 0.0 | No  |
| 6B | 54623422 | Tdurum_contig42194_1451      | 18.1 | 0.0 | No  |
| 6B | 37784476 | Tdurum_contig51326_364       | 18.1 | 0.0 | No  |
| 6B | 22731476 | Tdurum_contig58201_582       | 18.1 | 0.0 | No  |
| 6B | 40644462 | Tdurum_contig71266_87        | 18.1 | 0.0 | No  |
| 6B | 11666303 | Tdurum_contig92663_475       | 18.1 | 0.0 | No  |
| 6B | 67614403 | wsnp_CAP12_rep_c3885_1758057 | 18.1 | 0.0 | No  |
| 6B | 18659468 | wsnp_Ex_c1398_2676484        | 18.1 | 0.0 | No  |
| 6B | 73647470 | wsnp_Ex_c1398_2677127        | 18.1 | 0.0 | No  |



|    |          |                              |      |     |     |
|----|----------|------------------------------|------|-----|-----|
| 6B | 66734340 | wsnp_Ex_c16446_24946990      | 18.1 | 0.0 | No  |
| 6B | 31803462 | wsnp_Ex_c23122_32350412      | 18.1 | 0.0 | No  |
| 6B | 73676346 | wsnp_Ex_c3858_7011837        | 18.1 | 0.0 | No  |
| 6B | 33682316 | wsnp_Ex_c44857_50804565      | 18.1 | 0.0 | No  |
| 6B | 74699447 | wsnp_Ex_c5334_9427658        | 18.1 | 0.0 | No  |
| 6B | 44686392 | wsnp_Ex_c8843_14783989       | 18.1 | 0.0 | No  |
| 6B | 55648423 | wsnp_Ex_c9470_15701734       | 18.1 | 0.0 | No  |
| 6B | 66609348 | wsnp_Ex_rep_c101703_87021883 | 18.1 | 0.0 | No  |
| 6B | 63732369 | wsnp_Ex_rep_c103517_88455567 | 18.1 | 0.0 | No  |
| 6B | 52726500 | wsnp_JD_c2691_3617481        | 18.1 | 0.0 | No  |
| 6B | 24739488 | wsnp_JD_c5591_6743599        | 18.1 | 0.0 | No  |
| 6B | 61647369 | wsnp_JD_c681_1014454         | 18.1 | 0.0 | No  |
| 6B | 30739440 | wsnp_Ra_c11942_19247669      | 18.1 | 0.5 | No  |
| 6B | 28699343 | Ra_c1485_2726                | 18.6 | 7.6 | Yes |
| 6B | 65722506 | BS00075406_51                | 26.2 | 0.0 | Yes |
| 6B | 30721428 | BobWhite_c10614_157          | 26.2 | 0.0 | Yes |
| 6B | 36785379 | BobWhite_c5418_82            | 26.2 | 0.0 | No  |
| 6B | 25775429 | BS00028217_51                | 26.2 | 0.0 | No  |
| 6B | 12692394 | BS00065174_51                | 26.2 | 0.0 | No  |
| 6B | 59790437 | BS00088307_51                | 26.2 | 0.0 | No  |
| 6B | 61614400 | Excalibur_c17241_388         | 26.2 | 0.0 | No  |
| 6B | 59601503 | Excalibur_c22223_188         | 26.2 | 0.0 | No  |
| 6B | 52610317 | Excalibur_c33724_303         | 26.2 | 0.0 | No  |
| 6B | 18711419 | Excalibur_rep_c104880_102    | 26.2 | 0.0 | No  |
| 6B | 17752504 | GENE-3171_203                | 26.2 | 0.0 | No  |
| 6B | 53756494 | IAAV1673                     | 26.2 | 0.0 | No  |
| 6B | 67806391 | IACX11060                    | 26.2 | 0.0 | No  |
| 6B | 29680477 | JD_c5418_941                 | 26.2 | 0.0 | No  |
| 6B | 10675375 | Kukri_c21943_958             | 26.2 | 0.0 | No  |
| 6B | 20754468 | Kukri_c3044_188              | 26.2 | 0.0 | No  |
| 6B | 25657327 | Kukri_c5147_1856             | 26.2 | 0.0 | No  |
| 6B | 37655454 | Kukri_c53345_583             | 26.2 | 0.0 | No  |
| 6B | 38748455 | Kukri_c75566_265             | 26.2 | 0.0 | No  |
| 6B | 51612382 | Kukri_rep_c117390_70         | 26.2 | 0.0 | No  |
| 6B | 15710458 | RAC875_c11183_2580           | 26.2 | 0.0 | No  |
| 6B | 61808470 | RAC875_c13949_923            | 26.2 | 0.0 | No  |
| 6B | 10702442 | RAC875_c25902_594            | 26.2 | 0.0 | No  |
| 6B | 65678405 | RAC875_c27207_380            | 26.2 | 0.0 | No  |
| 6B | 26803383 | RAC875_c2730_620             | 26.2 | 0.0 | No  |
| 6B | 61810467 | RAC875_c33609_246            | 26.2 | 0.0 | No  |
| 6B | 67791394 | RAC875_c33609_381            | 26.2 | 0.0 | No  |
| 6B | 24772419 | RAC875_c47717_388            | 26.2 | 0.0 | No  |
| 6B | 71798505 | RAC875_c982_710              | 26.2 | 0.0 | No  |
| 6B | 15655394 | RAC875_rep_c104354_333       | 26.2 | 0.0 | No  |

|    |          |                              |      |     |     |
|----|----------|------------------------------|------|-----|-----|
| 6B | 37795425 | RAC875_rep_c111557_801       | 26.2 | 0.0 | No  |
| 6B | 66619465 | RAC875_rep_c71306_1026       | 26.2 | 0.0 | No  |
| 6B | 37762396 | RAC875_rep_c71306_97         | 26.2 | 0.0 | No  |
| 6B | 14714445 | RAC875_rep_c75251_505        | 26.2 | 0.0 | No  |
| 6B | 11797329 | Tdurum_contig29467_99        | 26.2 | 0.0 | No  |
| 6B | 22617493 | Tdurum_contig32619_202       | 26.2 | 0.0 | No  |
| 6B | 30750475 | Tdurum_contig42026_2552      | 26.2 | 0.0 | No  |
| 6B | 48733352 | Tdurum_contig42557_78        | 26.2 | 0.0 | No  |
| 6B | 28660480 | Tdurum_contig43119_297       | 26.2 | 0.0 | No  |
| 6B | 44780483 | Tdurum_contig45714_427       | 26.2 | 0.0 | No  |
| 6B | 49790498 | Tdurum_contig45714_546       | 26.2 | 0.0 | No  |
| 6B | 48618446 | Tdurum_contig48689_514       | 26.2 | 0.0 | No  |
| 6B | 11681389 | Tdurum_contig61970_499       | 26.2 | 0.0 | No  |
| 6B | 12658420 | Tdurum_contig61970_627       | 26.2 | 0.0 | No  |
| 6B | 43625502 | Tdurum_contig61970_835       | 26.2 | 0.0 | No  |
| 6B | 44719353 | Tdurum_contig62040_1247      | 26.2 | 0.0 | No  |
| 6B | 23654411 | Tdurum_contig62040_1487      | 26.2 | 0.0 | No  |
| 6B | 28609440 | Tdurum_contig62040_1494      | 26.2 | 0.0 | No  |
| 6B | 26780416 | Tdurum_contig62040_432       | 26.2 | 0.0 | No  |
| 6B | 53630321 | Tdurum_contig62383_259       | 26.2 | 0.0 | No  |
| 6B | 52680441 | Tdurum_contig75750_432       | 26.2 | 0.0 | No  |
| 6B | 38654375 | Tdurum_contig8740_109        | 26.2 | 0.0 | No  |
| 6B | 30770497 | Tdurum_contig98106_715       | 26.2 | 0.0 | No  |
| 6B | 23801417 | wsnp_Ex_c17435_26144201      | 26.2 | 0.0 | No  |
| 6B | 71650454 | wsnp_Ex_c19602_28584250      | 26.2 | 0.0 | No  |
| 6B | 16609435 | wsnp_Ex_c30852_39718945      | 26.2 | 0.0 | No  |
| 6B | 28663414 | wsnp_Ex_c3267_6026545        | 26.2 | 0.0 | No  |
| 6B | 39693395 | wsnp_Ex_c3267_6026676        | 26.2 | 0.0 | No  |
| 6B | 70710343 | wsnp_Ex_rep_c102159_87386822 | 26.2 | 0.0 | No  |
| 6B | 53702489 | wsnp_Ex_rep_c102159_87387134 | 26.2 | 0.0 | No  |
| 6B | 38655340 | wsnp_JD_c18284_16822042      | 26.2 | 0.0 | No  |
| 6B | 44671337 | wsnp_Ku_c13325_21275440      | 26.2 | 0.0 | No  |
| 6B | 21721502 | wsnp_Ku_c35839_44981841      | 26.2 | 0.0 | No  |
| 6B | 36722313 | wsnp_Ra_c13949_21928888      | 26.2 | 0.0 | No  |
| 6B | 26662501 | wsnp_Ra_c2730_5189836        | 26.2 | 0.0 | No  |
| 6B | 49702319 | wsnp_Ra_c2730_5190076        | 26.2 | 0.0 | No  |
| 6B | 37631382 | wsnp_Ra_c2730_5190365        | 26.2 | 1.4 | No  |
| 6B | 60669402 | Tdurum_contig13901_55        | 27.6 | 0.0 | Yes |
| 6B | 67662386 | BS00022823_51                | 27.6 | 0.0 | Yes |
| 6B | 55770342 | BS00049843_51                | 27.6 | 0.0 | No  |
| 6B | 43710386 | BS00064715_51                | 27.6 | 0.0 | No  |
| 6B | 10722403 | BS00065680_51                | 27.6 | 0.0 | No  |
| 6B | 23668481 | BS00067293_51                | 27.6 | 0.0 | No  |
| 6B | 17739327 | CAP8_c1361_367               | 27.6 | 0.0 | No  |

|      |                          |                          |      |      |     |
|------|--------------------------|--------------------------|------|------|-----|
| 6B   | 25615359                 | GENE-0221_721            | 27.6 | 0.0  | No  |
| 6B   | 30761392                 | Kukri_rep_c106450_71     | 27.6 | 0.0  | No  |
| 6B   | 62630356                 | RAC875_c23251_864        | 27.6 | 0.0  | No  |
| 6B   | 44721436                 | RAC875_c23812_187        | 27.6 | 0.0  | No  |
| 6B   | 17670496                 | RAC875_c52426_90         | 27.6 | 0.0  | No  |
| 6B   | 35715317                 | Tdurum_contig42930_481   | 27.6 | 0.0  | No  |
| 6B   | 62609370                 | Tdurum_contig43872_549   | 27.6 | 0.0  | No  |
| 6B   | 58664327                 | Tdurum_contig45478_1302  | 27.6 | 0.0  | No  |
| 6B   | 19721465                 | Tdurum_contig48939_754   | 27.6 | 0.0  | No  |
| 6B   | 61714456                 | Tdurum_contig49740_193   | 27.6 | 0.0  | No  |
| 6B   | 30753454                 | Tdurum_contig5132_1261   | 27.6 | 0.0  | No  |
| 6B   | 48623374                 | Tdurum_contig5486_1406   | 27.6 | 0.0  | No  |
| 6B   | 46705327                 | Tdurum_contig5486_177    | 27.6 | 0.0  | No  |
| 6B   | 64682350                 | Tdurum_contig56007_439   | 27.6 | 0.0  | No  |
| 6B   | 24725446                 | Tdurum_contig58200_210   | 27.6 | 0.0  | No  |
| 6B   | 57797347                 | Tdurum_contig62803_286   | 27.6 | 0.0  | No  |
| 6B   | 49691328                 | Tdurum_contig64861_211   | 27.6 | 0.0  | No  |
| 6B   | 15755437                 | Tdurum_contig9860_281    | 27.6 | 1.7  | No  |
| 6B   | <a href="#">wPt-8721</a> | <a href="#">wPt-8721</a> | 29.3 | 11.9 | Yes |
| 6B   | 30800480                 | Tdurum_contig11641_1008  | 41.2 | 1.4  | Yes |
| 6B   | <a href="#">tPt-2451</a> | <a href="#">tPt-2451</a> | 42.6 | 0.2  | Yes |
| 6B   | 40757356                 | BobWhite_c23416_168      | 42.8 | 0.0  | Yes |
| 6B   | 23690480                 | Kukri_c102760_148        | 42.8 | 0.0  | No  |
| 6B   | 13620485                 | Kukri_c54773_76          | 42.8 | 0.0  | No  |
| 6B   | 34735447                 | Kukri_c61725_199         | 42.8 | 0.0  | No  |
| 6B   | 17767380                 | Kukri_c61725_545         | 42.8 | 0.0  | No  |
| 6B   | 29726372                 | Kukri_rep_c103613_253    | 42.8 | 0.0  | No  |
| 6B   | 34692308                 | Kukri_rep_c104545_173    | 42.8 | 0.0  | No  |
| 6B   | 44710316                 | Ra_c27159_181            | 42.8 | 0.0  | No  |
| 6B   | 15764479                 | RAC875_c13920_747        | 42.8 | 0.0  | No  |
| 6B   | 47640410                 | RAC875_c13920_836        | 42.8 | 0.0  | No  |
| 6B   | 29658458                 | Tdurum_contig43092_876   | 42.8 | 0.0  | No  |
| 6B   | 67659346                 | Tdurum_contig47020_1135  | 42.8 | 0.0  | No  |
| 6B   | 43739343                 | Tdurum_contig47020_173   | 42.8 | 0.0  | No  |
| 6B   | 46809442                 | Tdurum_contig47204_301   | 42.8 | 0.1  | No  |
| 6B   | <a href="#">wPt-3606</a> | <a href="#">wPt-3606</a> | 42.9 | 0.4  | Yes |
| 6B   | <a href="#">wPt-5333</a> | <a href="#">wPt-5333</a> | 43.3 | 1.1  | Yes |
| 6B   | <a href="#">wPt-3309</a> | <a href="#">wPt-3309</a> | 44.3 |      | Yes |
| 7A_1 | 14675320                 | Ra_c12301_484            | 0.0  | 1.4  | Yes |
| 7A_1 | 37762375                 | Tdurum_contig49189_168   | 1.4  | 1.5  | Yes |
| 7A_1 | 36801417                 | Tdurum_contig41133_341   | 2.9  | 3.9  | Yes |
| 7A_1 | <a href="#">wPt-1080</a> | <a href="#">wPt-1080</a> | 6.8  | 0.9  | Yes |
| 7A_1 | <a href="#">wPt-3373</a> | <a href="#">wPt-3373</a> | 7.7  | 0.8  | Yes |
| 7A_1 | <a href="#">wPt-4345</a> | <a href="#">wPt-4345</a> | 8.5  | 0.1  | Yes |

|      |          |                         |     |     |     |
|------|----------|-------------------------|-----|-----|-----|
| 7A_1 | wPt-7076 | wPt-7076                | 8.6 | 0.6 | Yes |
| 7A_1 | wPt-0288 | wPt-0288                | 9.2 | 0.1 | Yes |
| 7A_1 | 32730507 | BobWhite_c6193_298      | 9.4 | 0.0 | Yes |
| 7A_1 | 60654318 | BS00021769_51           | 9.4 | 0.0 | No  |
| 7A_1 | 48639409 | BS00022475_51           | 9.4 | 0.0 | No  |
| 7A_1 | 23758435 | BS00047690_51           | 9.4 | 0.0 | No  |
| 7A_1 | 10750437 | BS00076461_51           | 9.4 | 0.0 | No  |
| 7A_1 | 44602419 | BS00093895_51           | 9.4 | 0.0 | No  |
| 7A_1 | 35691410 | BS00093896_51           | 9.4 | 0.0 | No  |
| 7A_1 | 47806463 | CAP12_c6260_64          | 9.4 | 0.0 | No  |
| 7A_1 | 42752500 | Ex_c44379_2197          | 9.4 | 0.0 | No  |
| 7A_1 | 51795477 | GENE-4338_512           | 9.4 | 0.0 | No  |
| 7A_1 | 66615477 | IACX481                 | 9.4 | 0.0 | No  |
| 7A_1 | 25712455 | JD_c6934_1038           | 9.4 | 0.0 | No  |
| 7A_1 | 52768373 | Ku_c62485_931           | 9.4 | 0.0 | No  |
| 7A_1 | 39606507 | Kukri_c16480_370        | 9.4 | 0.0 | No  |
| 7A_1 | 20752401 | Kukri_c2737_89          | 9.4 | 0.0 | No  |
| 7A_1 | 49707325 | Kukri_c484_1877         | 9.4 | 0.0 | No  |
| 7A_1 | 53716382 | Kukri_c63336_279        | 9.4 | 0.0 | No  |
| 7A_1 | 63610449 | Kukri_c63336_621        | 9.4 | 0.0 | No  |
| 7A_1 | 36679474 | Kukri_c6453_184         | 9.4 | 0.0 | No  |
| 7A_1 | 28604303 | Kukri_rep_c110838_253   | 9.4 | 0.0 | No  |
| 7A_1 | 63774486 | RAC875_c100339_541      | 9.4 | 0.0 | No  |
| 7A_1 | 53638362 | RAC875_c14386_600       | 9.4 | 0.0 | No  |
| 7A_1 | 70643423 | RAC875_c14386_822       | 9.4 | 0.0 | No  |
| 7A_1 | 37699473 | RAC875_c67063_703       | 9.4 | 0.0 | No  |
| 7A_1 | 41733302 | RAC875_c67063_984       | 9.4 | 0.0 | No  |
| 7A_1 | 20805300 | RAC875_rep_c111778_387  | 9.4 | 0.0 | No  |
| 7A_1 | 12609403 | RAC875_rep_c72596_466   | 9.4 | 0.0 | No  |
| 7A_1 | 35665450 | RAC875_rep_c76772_850   | 9.4 | 0.0 | No  |
| 7A_1 | 31655416 | TA001083-0602           | 9.4 | 0.0 | No  |
| 7A_1 | 10619461 | TA001398-1597           | 9.4 | 0.0 | No  |
| 7A_1 | 24708364 | TA003194-1513           | 9.4 | 0.0 | No  |
| 7A_1 | 38800353 | Tdurum_contig16839_284  | 9.4 | 0.0 | No  |
| 7A_1 | 25668505 | Tdurum_contig19352_76   | 9.4 | 0.0 | No  |
| 7A_1 | 16796404 | Tdurum_contig29796_109  | 9.4 | 0.0 | No  |
| 7A_1 | 64628339 | Tdurum_contig29796_126  | 9.4 | 0.0 | No  |
| 7A_1 | 51759330 | Tdurum_contig42661_202  | 9.4 | 0.0 | No  |
| 7A_1 | 59720455 | Tdurum_contig43052_3611 | 9.4 | 0.0 | No  |
| 7A_1 | 26611309 | Tdurum_contig43052_3851 | 9.4 | 0.0 | No  |
| 7A_1 | 34679425 | Tdurum_contig47443_361  | 9.4 | 0.0 | No  |
| 7A_1 | 34708421 | Tdurum_contig61653_126  | 9.4 | 0.0 | No  |
| 7A_1 | 58736470 | Tdurum_contig61653_358  | 9.4 | 0.0 | No  |
| 7A_1 | 63761420 | Tdurum_contig61653_802  | 9.4 | 0.0 | No  |

|      |          |                             |      |     |     |
|------|----------|-----------------------------|------|-----|-----|
| 7A_1 | 18784509 | Tdurum_contig63598_188      | 9.4  | 0.0 | No  |
| 7A_1 | 47709334 | Tdurum_contig65261_244      | 9.4  | 0.0 | No  |
| 7A_1 | 57706498 | Tdurum_contig68236_437      | 9.4  | 0.0 | No  |
| 7A_1 | 12628404 | Tdurum_contig69247_268      | 9.4  | 0.0 | No  |
| 7A_1 | 21726357 | Tdurum_contig71271_261      | 9.4  | 0.1 | No  |
| 7A_1 | 62788496 | Tdurum_contig71875_247      | 9.4  | 0.1 | Yes |
| 7A_1 | 33703487 | RAC875_c13093_86            | 9.5  | 0.7 | Yes |
| 7A_1 | 68757359 | wsnp_CAP11_c1591_881161     | 10.2 | 0.0 | Yes |
| 7A_1 | 29686501 | wsnp_JG_c227_167774         | 10.2 | 0.3 | No  |
| 7A_1 | 67713317 | BobWhite_c12159_729         | 10.5 | 0.0 | Yes |
| 7A_1 | 57676302 | BS00040657_51               | 10.5 | 0.0 | No  |
| 7A_1 | 49723304 | D_GDRF1KQ02H7HJS_109        | 10.5 | 0.0 | No  |
| 7A_1 | 17741470 | Tdurum_contig46368_742      | 10.5 | 0.0 | No  |
| 7A_1 | 72759483 | Tdurum_contig60128_346      | 10.5 | 1.0 | No  |
| 7A_1 | 44711484 | BS00040929_51               | 11.5 | 0.0 | Yes |
| 7A_1 | 73604394 | BS00079614_51               | 11.5 | 0.0 | No  |
| 7A_1 | 63691345 | Excalibur_c42993_561        | 11.5 | 0.0 | No  |
| 7A_1 | 66660352 | Excalibur_c60598_158        | 11.5 | 0.0 | No  |
| 7A_1 | 41617397 | Excalibur_c9488_702         | 11.5 | 0.0 | No  |
| 7A_1 | 55640440 | Excalibur_rep_c72139_187    | 11.5 | 0.0 | No  |
| 7A_1 | 40644306 | IACX9283                    | 11.5 | 0.0 | No  |
| 7A_1 | 22680504 | Kukri_rep_c101532_104       | 11.5 | 0.0 | No  |
| 7A_1 | 50628495 | Kukri_rep_c101532_1046      | 11.5 | 0.0 | No  |
| 7A_1 | 10720432 | Tdurum_contig99143_205      | 11.5 | 2.5 | No  |
| 7A_1 | 69780475 | IAAV3449                    | 14.0 | 0.3 | Yes |
| 7A_1 | 51661450 | BS00023831_51               | 14.3 | 0.0 | Yes |
| 7A_1 | 46732425 | BS00091101_51               | 14.3 | 0.0 | No  |
| 7A_1 | 34701435 | IAAV1069                    | 14.3 | 0.0 | No  |
| 7A_1 | 22785373 | IAAV5054                    | 14.3 | 0.0 | No  |
| 7A_1 | 42653396 | IAAV5058                    | 14.3 | 0.0 | No  |
| 7A_1 | 38643374 | Kukri_c31596_412            | 14.3 | 0.0 | No  |
| 7A_1 | 10737401 | Kukri_c31596_630            | 14.3 | 0.0 | No  |
| 7A_1 | 54603320 | Kukri_c31596_818            | 14.3 | 0.0 | No  |
| 7A_1 | 18669388 | Kukri_c31596_872            | 14.3 | 0.0 | No  |
| 7A_1 | 69768359 | Kukri_rep_c101286_390       | 14.3 | 0.0 | No  |
| 7A_1 | 46686445 | Kukri_rep_c105330_552       | 14.3 | 0.0 | No  |
| 7A_1 | 30728411 | Kukri_rep_c75743_357        | 14.3 | 0.0 | No  |
| 7A_1 | 29803430 | RAC875_c7019_754            | 14.3 | 0.0 | No  |
| 7A_1 | 18687376 | RAC875_c81356_645           | 14.3 | 0.0 | No  |
| 7A_1 | 25648333 | RAC875_c81356_688           | 14.3 | 0.0 | No  |
| 7A_1 | 16642302 | Tdurum_contig51189_574      | 14.3 | 0.0 | No  |
| 7A_1 | 67761368 | wsnp_Ku_rep_c71755_71490557 | 14.3 | 2.6 | No  |
| 7A_1 | 29612382 | Tdurum_contig98197_73       | 16.9 | 0.5 | Yes |
| 7A_1 | 29753417 | BS00022369_51               | 17.4 | 0.0 | Yes |

|      |          |                         |      |     |     |
|------|----------|-------------------------|------|-----|-----|
| 7A_1 | 74765358 | BS00049729_51           | 17.4 | 0.0 | No  |
| 7A_1 | 57617320 | Tdurum_contig24133_438  | 17.4 | 0.0 | No  |
| 7A_1 | 16768305 | Tdurum_contig51089_1066 | 17.4 | 0.0 | No  |
| 7A_1 | 65654482 | wsnp_BE498209A_Ta_2_1   | 17.4 | 0.8 | No  |
| 7A_1 | 39805473 | Tdurum_contig42011_1051 | 18.1 | 0.0 | Yes |
| 7A_1 | 71708499 | wsnp_be471272A_Ta_2_1   | 18.1 | 0.0 | No  |
| 7A_1 | 34789460 | wsnp_Ra_c250_526345     | 18.1 | 0.3 | No  |
| 7A_1 | 47657427 | BobWhite_c19875_271     | 18.4 | 0.0 | Yes |
| 7A_1 | 31606311 | BobWhite_c20374_162     | 18.4 | 0.0 | No  |
| 7A_1 | 62731319 | BobWhite_c23146_84      | 18.4 | 0.0 | No  |
| 7A_1 | 32645421 | BobWhite_c24259_117     | 18.4 | 0.0 | No  |
| 7A_1 | 48743407 | BobWhite_c47716_503     | 18.4 | 0.0 | No  |
| 7A_1 | 44755510 | BobWhite_rep_c49547_310 | 18.4 | 0.0 | No  |
| 7A_1 | 73779497 | BobWhite_rep_c66337_650 | 18.4 | 0.0 | No  |
| 7A_1 | 65763389 | BS00021936_51           | 18.4 | 0.0 | No  |
| 7A_1 | 37801450 | BS00035678_51           | 18.4 | 0.0 | No  |
| 7A_1 | 63705367 | BS00036422_51           | 18.4 | 0.0 | No  |
| 7A_1 | 49673509 | BS00040156_51           | 18.4 | 0.0 | No  |
| 7A_1 | 11778504 | BS00063383_51           | 18.4 | 0.0 | No  |
| 7A_1 | 12759466 | BS00063673_51           | 18.4 | 0.0 | No  |
| 7A_1 | 44781350 | BS00063933_51           | 18.4 | 0.0 | No  |
| 7A_1 | 42667388 | BS00064189_51           | 18.4 | 0.0 | No  |
| 7A_1 | 28615453 | BS00065127_51           | 18.4 | 0.0 | No  |
| 7A_1 | 40767474 | BS00065346_51           | 18.4 | 0.0 | No  |
| 7A_1 | 23707427 | BS00065647_51           | 18.4 | 0.0 | No  |
| 7A_1 | 44681385 | BS00066045_51           | 18.4 | 0.0 | No  |
| 7A_1 | 70669316 | BS00066536_51           | 18.4 | 0.0 | No  |
| 7A_1 | 46804303 | BS00066695_51           | 18.4 | 0.0 | No  |
| 7A_1 | 52685506 | BS00067030_51           | 18.4 | 0.0 | No  |
| 7A_1 | 61680406 | BS00067200_51           | 18.4 | 0.0 | No  |
| 7A_1 | 61749439 | BS00067759_51           | 18.4 | 0.0 | No  |
| 7A_1 | 61624378 | BS00068510_51           | 18.4 | 0.0 | No  |
| 7A_1 | 16731333 | BS00073125_51           | 18.4 | 0.0 | No  |
| 7A_1 | 36659329 | BS00077560_51           | 18.4 | 0.0 | No  |
| 7A_1 | 27673474 | BS00077955_51           | 18.4 | 0.0 | No  |
| 7A_1 | 29779351 | BS00078522_51           | 18.4 | 0.0 | No  |
| 7A_1 | 40606318 | BS00079590_51           | 18.4 | 0.0 | No  |
| 7A_1 | 37603466 | BS00079591_51           | 18.4 | 0.0 | No  |
| 7A_1 | 33781373 | Ex_c13716_356           | 18.4 | 0.0 | No  |
| 7A_1 | 18808428 | Ex_c21222_313           | 18.4 | 0.0 | No  |
| 7A_1 | 24646382 | Ex_c37521_670           | 18.4 | 0.0 | No  |
| 7A_1 | 29686364 | Ex_c38707_1039          | 18.4 | 0.0 | No  |
| 7A_1 | 32760332 | Ex_c41740_166           | 18.4 | 0.0 | No  |
| 7A_1 | 56741498 | Ex_c52578_44            | 18.4 | 0.0 | No  |

|      |          |                           |      |     |    |
|------|----------|---------------------------|------|-----|----|
| 7A_1 | 54611373 | Ex_c6348_1205             | 18.4 | 0.0 | No |
| 7A_1 | 65717455 | Ex_c68102_201             | 18.4 | 0.0 | No |
| 7A_1 | 74793397 | Ex_c7569_919              | 18.4 | 0.0 | No |
| 7A_1 | 23757355 | Excalibur_c1247_306       | 18.4 | 0.0 | No |
| 7A_1 | 19730490 | Excalibur_c15904_1331     | 18.4 | 0.0 | No |
| 7A_1 | 39691323 | Excalibur_c16401_1664     | 18.4 | 0.0 | No |
| 7A_1 | 14630466 | Excalibur_c20450_230      | 18.4 | 0.0 | No |
| 7A_1 | 45601393 | Excalibur_c26782_423      | 18.4 | 0.0 | No |
| 7A_1 | 25617395 | Excalibur_c34091_311      | 18.4 | 0.0 | No |
| 7A_1 | 28604388 | Excalibur_c37700_1016     | 18.4 | 0.0 | No |
| 7A_1 | 63783312 | Excalibur_c6806_213       | 18.4 | 0.0 | No |
| 7A_1 | 14781400 | Excalibur_c7415_148       | 18.4 | 0.0 | No |
| 7A_1 | 69712500 | Excalibur_rep_c106162_519 | 18.4 | 0.0 | No |
| 7A_1 | 61705450 | Excalibur_rep_c67182_584  | 18.4 | 0.0 | No |
| 7A_1 | 32713460 | Excalibur_rep_c67835_488  | 18.4 | 0.0 | No |
| 7A_1 | 33657481 | Excalibur_rep_c81365_214  | 18.4 | 0.0 | No |
| 7A_1 | 72699471 | GENE-4508_109             | 18.4 | 0.0 | No |
| 7A_1 | 41657342 | IAAV222                   | 18.4 | 0.0 | No |
| 7A_1 | 66767452 | IAAV4430                  | 18.4 | 0.0 | No |
| 7A_1 | 32682413 | IAAV8611                  | 18.4 | 0.0 | No |
| 7A_1 | 63681301 | Ku_c2205_1317             | 18.4 | 0.0 | No |
| 7A_1 | 49702503 | Ku_c307_1994              | 18.4 | 0.0 | No |
| 7A_1 | 63654466 | Ku_c307_653               | 18.4 | 0.0 | No |
| 7A_1 | 42650509 | Ku_c3251_1103             | 18.4 | 0.0 | No |
| 7A_1 | 43732418 | Kukri_c108278_520         | 18.4 | 0.0 | No |
| 7A_1 | 11678479 | Kukri_c14150_109          | 18.4 | 0.0 | No |
| 7A_1 | 58626412 | Kukri_c18365_943          | 18.4 | 0.0 | No |
| 7A_1 | 18699389 | Kukri_c27326_260          | 18.4 | 0.0 | No |
| 7A_1 | 28614396 | Kukri_c3407_1165          | 18.4 | 0.0 | No |
| 7A_1 | 29721334 | Kukri_c45895_132          | 18.4 | 0.0 | No |
| 7A_1 | 71748450 | Kukri_rep_c68087_688      | 18.4 | 0.0 | No |
| 7A_1 | 23659418 | Kukri_rep_c73018_94       | 18.4 | 0.0 | No |
| 7A_1 | 45680438 | Kukri_rep_c85030_287      | 18.4 | 0.0 | No |
| 7A_1 | 38703382 | Ra_c1333_616              | 18.4 | 0.0 | No |
| 7A_1 | 32748316 | Ra_c19230_1446            | 18.4 | 0.0 | No |
| 7A_1 | 64705397 | Ra_c19726_1206            | 18.4 | 0.0 | No |
| 7A_1 | 28778510 | Ra_c25852_308             | 18.4 | 0.0 | No |
| 7A_1 | 41656506 | Ra_c29645_476             | 18.4 | 0.0 | No |
| 7A_1 | 66695329 | Ra_c32338_220             | 18.4 | 0.0 | No |
| 7A_1 | 71749316 | Ra_c3705_2101             | 18.4 | 0.0 | No |
| 7A_1 | 23781368 | Ra_c40378_557             | 18.4 | 0.0 | No |
| 7A_1 | 42788455 | Ra_c40942_331             | 18.4 | 0.0 | No |
| 7A_1 | 74736348 | Ra_c44368_354             | 18.4 | 0.0 | No |
| 7A_1 | 31607384 | Ra_c5251_2533             | 18.4 | 0.0 | No |

|      |          |                        |      |     |    |
|------|----------|------------------------|------|-----|----|
| 7A_1 | 12646495 | Ra_c64159_441          | 18.4 | 0.0 | No |
| 7A_1 | 55663334 | Ra_c64159_480          | 18.4 | 0.0 | No |
| 7A_1 | 70609381 | Ra_c66215_1118         | 18.4 | 0.0 | No |
| 7A_1 | 38786347 | Ra_c6845_1501          | 18.4 | 0.0 | No |
| 7A_1 | 54627330 | Ra_c8425_1331          | 18.4 | 0.0 | No |
| 7A_1 | 32645445 | Ra_c9151_404           | 18.4 | 0.0 | No |
| 7A_1 | 63659394 | Ra_c9151_770           | 18.4 | 0.0 | No |
| 7A_1 | 72623447 | RAC875_c10054_2066     | 18.4 | 0.0 | No |
| 7A_1 | 31775408 | RAC875_c109483_523     | 18.4 | 0.0 | No |
| 7A_1 | 37657464 | RAC875_c16624_970      | 18.4 | 0.0 | No |
| 7A_1 | 55680481 | RAC875_c16641_411      | 18.4 | 0.0 | No |
| 7A_1 | 56677358 | RAC875_c1817_950       | 18.4 | 0.0 | No |
| 7A_1 | 19699408 | RAC875_c23581_105      | 18.4 | 0.0 | No |
| 7A_1 | 18742476 | RAC875_c25834_506      | 18.4 | 0.0 | No |
| 7A_1 | 48626427 | RAC875_c29533_594      | 18.4 | 0.0 | No |
| 7A_1 | 49706346 | RAC875_c37071_73       | 18.4 | 0.0 | No |
| 7A_1 | 50611398 | RAC875_c37565_396      | 18.4 | 0.0 | No |
| 7A_1 | 34677363 | RAC875_c42827_140      | 18.4 | 0.0 | No |
| 7A_1 | 13649311 | RAC875_c52232_196      | 18.4 | 0.0 | No |
| 7A_1 | 49718509 | RAC875_c53177_101      | 18.4 | 0.0 | No |
| 7A_1 | 22772386 | RAC875_c58527_91       | 18.4 | 0.0 | No |
| 7A_1 | 50785318 | RAC875_c58560_526      | 18.4 | 0.0 | No |
| 7A_1 | 26677306 | RAC875_c61210_285      | 18.4 | 0.0 | No |
| 7A_1 | 13757465 | RAC875_c62895_300      | 18.4 | 0.0 | No |
| 7A_1 | 66660413 | RAC875_c64450_145      | 18.4 | 0.0 | No |
| 7A_1 | 66789476 | RAC875_c7138_264       | 18.4 | 0.0 | No |
| 7A_1 | 59610406 | RAC875_c75858_184      | 18.4 | 0.0 | No |
| 7A_1 | 46602338 | RAC875_c7862_1205      | 18.4 | 0.0 | No |
| 7A_1 | 49669510 | RAC875_c84991_191      | 18.4 | 0.0 | No |
| 7A_1 | 72709390 | RAC875_rep_c105853_75  | 18.4 | 0.0 | No |
| 7A_1 | 17627406 | RAC875_rep_c111703_561 | 18.4 | 0.0 | No |
| 7A_1 | 20668450 | RAC875_rep_c116752_107 | 18.4 | 0.0 | No |
| 7A_1 | 13727322 | RAC875_rep_c70756_1009 | 18.4 | 0.0 | No |
| 7A_1 | 71724447 | RAC875_rep_c73101_689  | 18.4 | 0.0 | No |
| 7A_1 | 22654392 | RAC875_rep_c73101_932  | 18.4 | 0.0 | No |
| 7A_1 | 41644383 | RAC875_rep_c81362_344  | 18.4 | 0.0 | No |
| 7A_1 | 33615488 | RFL_Contig5478_741     | 18.4 | 0.0 | No |
| 7A_1 | 14803360 | TA001739-1268          | 18.4 | 0.0 | No |
| 7A_1 | 39805366 | TA002502-2086          | 18.4 | 0.0 | No |
| 7A_1 | 26697472 | TA006055-0231          | 18.4 | 0.0 | No |
| 7A_1 | 74762386 | Tdurum_contig10174_155 | 18.4 | 0.0 | No |
| 7A_1 | 19704391 | Tdurum_contig11542_452 | 18.4 | 0.0 | No |
| 7A_1 | 51691508 | Tdurum_contig11542_548 | 18.4 | 0.0 | No |
| 7A_1 | 14699327 | Tdurum_contig11862_341 | 18.4 | 0.0 | No |



|      |          |                              |      |     |    |
|------|----------|------------------------------|------|-----|----|
| 7A_1 | 49773438 | Tdurum_contig12156_160       | 18.4 | 0.0 | No |
| 7A_1 | 56698469 | Tdurum_contig28838_226       | 18.4 | 0.0 | No |
| 7A_1 | 16615451 | Tdurum_contig28843_80        | 18.4 | 0.0 | No |
| 7A_1 | 48810507 | Tdurum_contig29988_148       | 18.4 | 0.0 | No |
| 7A_1 | 73692312 | Tdurum_contig30504_205       | 18.4 | 0.0 | No |
| 7A_1 | 33672493 | Tdurum_contig31407_132       | 18.4 | 0.0 | No |
| 7A_1 | 18644452 | Tdurum_contig42547_1197      | 18.4 | 0.0 | No |
| 7A_1 | 28791430 | Tdurum_contig49723_593       | 18.4 | 0.0 | No |
| 7A_1 | 52738484 | Tdurum_contig5799_773        | 18.4 | 0.0 | No |
| 7A_1 | 57706493 | Tdurum_contig59908_400       | 18.4 | 0.0 | No |
| 7A_1 | 47730333 | Tdurum_contig62237_531       | 18.4 | 0.0 | No |
| 7A_1 | 33662342 | Tdurum_contig70105_162       | 18.4 | 0.0 | No |
| 7A_1 | 49630404 | Tdurum_contig76441_240       | 18.4 | 0.0 | No |
| 7A_1 | 36674480 | wsnp_BE405483A_Ta_1_1        | 18.4 | 0.0 | No |
| 7A_1 | 67723439 | wsnp_CAP11_c592_400447       | 18.4 | 0.0 | No |
| 7A_1 | 37603314 | wsnp_Ex_c10094_16590615      | 18.4 | 0.0 | No |
| 7A_1 | 54764493 | wsnp_Ex_c10094_16590746      | 18.4 | 0.0 | No |
| 7A_1 | 13623361 | wsnp_Ex_c10988_17836981      | 18.4 | 0.0 | No |
| 7A_1 | 12606304 | wsnp_Ex_c11228_18162713      | 18.4 | 0.0 | No |
| 7A_1 | 56609510 | wsnp_Ex_c11350_18330527      | 18.4 | 0.0 | No |
| 7A_1 | 64626417 | wsnp_Ex_c1247_2397552        | 18.4 | 0.0 | No |
| 7A_1 | 18738380 | wsnp_Ex_c14173_22107343      | 18.4 | 0.0 | No |
| 7A_1 | 74640464 | wsnp_Ex_c19198_28115812      | 18.4 | 0.0 | No |
| 7A_1 | 29683369 | wsnp_Ex_c19262_28188808      | 18.4 | 0.0 | No |
| 7A_1 | 46768335 | wsnp_Ex_c23156_32391014      | 18.4 | 0.0 | No |
| 7A_1 | 46677415 | wsnp_Ex_c25188_34454616      | 18.4 | 0.0 | No |
| 7A_1 | 61634405 | wsnp_Ex_c26560_35803210      | 18.4 | 0.0 | No |
| 7A_1 | 62699467 | wsnp_Ex_c3456_6336435        | 18.4 | 0.0 | No |
| 7A_1 | 31607307 | wsnp_Ex_c36591_44511294      | 18.4 | 0.0 | No |
| 7A_1 | 48611367 | wsnp_Ex_c398_784427          | 18.4 | 0.0 | No |
| 7A_1 | 61613481 | wsnp_Ex_c398_784645          | 18.4 | 0.0 | No |
| 7A_1 | 29754429 | wsnp_Ex_c40666_47674310      | 18.4 | 0.0 | No |
| 7A_1 | 63705395 | wsnp_Ex_c43292_49653827      | 18.4 | 0.0 | No |
| 7A_1 | 71663478 | wsnp_Ex_c461_907742          | 18.4 | 0.0 | No |
| 7A_1 | 50741339 | wsnp_Ex_c4819_8600618        | 18.4 | 0.0 | No |
| 7A_1 | 23613341 | wsnp_Ex_c5025_8932208        | 18.4 | 0.0 | No |
| 7A_1 | 30688390 | wsnp_Ex_c5330_9422106        | 18.4 | 0.0 | No |
| 7A_1 | 71672486 | wsnp_Ex_c6797_11731807       | 18.4 | 0.0 | No |
| 7A_1 | 40715305 | wsnp_Ex_c6797_11732168       | 18.4 | 0.0 | No |
| 7A_1 | 27780424 | wsnp_Ex_c8615_14454633       | 18.4 | 0.0 | No |
| 7A_1 | 42657318 | wsnp_Ex_rep_c102317_87512660 | 18.4 | 0.0 | No |
| 7A_1 | 14743344 | wsnp_Ex_rep_c105174_89674370 | 18.4 | 0.0 | No |
| 7A_1 | 61733474 | wsnp_Ex_rep_c68227_67012082  | 18.4 | 0.0 | No |
| 7A_1 | 60764426 | wsnp_Ex_rep_c69132_68043811  | 18.4 | 0.0 | No |

|      |          |                              |      |     |     |
|------|----------|------------------------------|------|-----|-----|
| 7A_1 | 21748303 | wsnp_Ex_rep_c70294_69236911  | 18.4 | 0.0 | No  |
| 7A_1 | 34628499 | wsnp_Ex_rep_c70294_69237001  | 18.4 | 0.0 | No  |
| 7A_1 | 42680387 | wsnp_Ex_rep_c70629_69539466  | 18.4 | 0.0 | No  |
| 7A_1 | 14684475 | wsnp_Ex_rep_c71217_70021470  | 18.4 | 0.0 | No  |
| 7A_1 | 43788462 | wsnp_JD_c6050_7214383        | 18.4 | 0.0 | No  |
| 7A_1 | 35713391 | wsnp_JD_c7987_9038994        | 18.4 | 0.0 | No  |
| 7A_1 | 71710504 | wsnp_Ku_c48323_54539687      | 18.4 | 0.0 | No  |
| 7A_1 | 56602455 | wsnp_Ku_rep_c70256_69818445  | 18.4 | 0.0 | No  |
| 7A_1 | 73702407 | wsnp_Ra_c109483_92428320     | 18.4 | 0.0 | No  |
| 7A_1 | 31657384 | wsnp_Ra_c12708_20281439      | 18.4 | 0.0 | No  |
| 7A_1 | 73630380 | wsnp_Ra_c13009_20690735      | 18.4 | 0.0 | No  |
| 7A_1 | 72623371 | wsnp_Ra_c20371_29633358      | 18.4 | 0.0 | No  |
| 7A_1 | 37680365 | wsnp_Ra_c25918_35485125      | 18.4 | 0.0 | No  |
| 7A_1 | 14649399 | wsnp_Ra_c428_904568          | 18.4 | 0.0 | No  |
| 7A_1 | 63682330 | wsnp_Ra_c5251_9356517        | 18.4 | 0.0 | No  |
| 7A_1 | 57630475 | wsnp_Ra_c75858_73254602      | 18.4 | 0.0 | No  |
| 7A_1 | 71672303 | wsnp_Ra_rep_c70756_68674560  | 18.4 | 0.0 | No  |
| 7A_1 | 17758334 | wsnp_Ra_rep_c70756_68675384  | 18.4 | 0.0 | No  |
| 7A_1 | 58638360 | Jagger_c7141_114             | 18.4 | 1.1 | Yes |
| 7A_1 | 23690438 | BS00015354_51                | 19.6 | 0.0 | Yes |
| 7A_1 | 40733392 | BS00080365_51                | 19.6 | 0.0 | No  |
| 7A_1 | 56678371 | IAAV6170                     | 19.6 | 0.0 | No  |
| 7A_1 | 26736427 | Kukri_c53985_59              | 19.6 | 0.0 | No  |
| 7A_1 | 71763460 | Kukri_c64283_212             | 19.6 | 0.0 | No  |
| 7A_1 | 20756442 | Ra_c41488_398                | 19.6 | 0.0 | No  |
| 7A_1 | 28810431 | Tdurum_contig42093_1170      | 19.6 | 0.0 | No  |
| 7A_1 | 11684333 | Tdurum_contig48442_645       | 19.6 | 0.0 | No  |
| 7A_1 | 46754481 | wsnp_Ex_c11417_18429357      | 19.6 | 0.0 | No  |
| 7A_1 | 15790457 | wsnp_Ex_c13721_21532196      | 19.6 | 0.0 | No  |
| 7A_1 | 74618364 | wsnp_Ex_c45495_51274052      | 19.6 | 0.0 | No  |
| 7A_1 | 52786474 | wsnp_Ex_c4996_8885500        | 19.6 | 0.0 | No  |
| 7A_1 | 74739376 | wsnp_Ku_c2958_5561339        | 19.6 | 0.0 | No  |
| 7A_1 | 43761461 | wsnp_Ra_c1303_2598907        | 19.6 | 0.0 | No  |
| 7A_1 | 19665396 | wsnp_Ra_rep_c104968_88985755 | 19.6 | 0.6 | No  |
| 7A_1 | 34662478 | BS00062829_51                | 20.2 | 0.0 | Yes |
| 7A_1 | 62741420 | BS00076743_51                | 20.2 | 0.0 | No  |
| 7A_1 | 18709483 | TA003505-0833                | 20.2 | 4.3 | No  |
| 7A_1 | 69790408 | Tdurum_contig17697_675       | 24.6 | 6.6 | Yes |
| 7A_1 | 70627418 | RAC875_c13300_139            | 31.2 | 0.0 | Yes |
| 7A_1 | 31675319 | wsnp_Ex_c2277_4267788        | 31.2 | 0.0 | No  |
| 7A_1 | 64684429 | wsnp_Ra_c7969_13600474       | 31.2 | 1.2 | No  |
| 7A_1 | 33653416 | Ra_c31466_694                | 32.4 | 0.2 | Yes |
| 7A_1 | 56630325 | Ra_c1227_2718                | 32.5 | 0.0 | Yes |
| 7A_1 | 10685326 | BobWhite_c17095_237          | 32.6 | 0.0 | Yes |

|      |          |                       |      |     |    |
|------|----------|-----------------------|------|-----|----|
| 7A_1 | 19759350 | BS00002491_51         | 32.6 | 0.0 | No |
| 7A_1 | 42712499 | BS00021659_51         | 32.6 | 0.0 | No |
| 7A_1 | 30798434 | BS00021924_51         | 32.6 | 0.0 | No |
| 7A_1 | 60703315 | BS00044260_51         | 32.6 | 0.0 | No |
| 7A_1 | 38655318 | BS00059928_51         | 32.6 | 0.0 | No |
| 7A_1 | 73650317 | BS00078324_51         | 32.6 | 0.0 | No |
| 7A_1 | 34767427 | BS00092631_51         | 32.6 | 0.0 | No |
| 7A_1 | 14648489 | BS00109319_51         | 32.6 | 0.0 | No |
| 7A_1 | 22757443 | CAP7_c1522_255        | 32.6 | 0.0 | No |
| 7A_1 | 52765333 | Ex_c7833_486          | 32.6 | 0.0 | No |
| 7A_1 | 47664380 | Excalibur_c12996_775  | 32.6 | 0.0 | No |
| 7A_1 | 69677402 | Excalibur_c1884_548   | 32.6 | 0.0 | No |
| 7A_1 | 44773413 | Excalibur_c2359_1511  | 32.6 | 0.0 | No |
| 7A_1 | 31804445 | Excalibur_c47990_159  | 32.6 | 0.0 | No |
| 7A_1 | 30751404 | Excalibur_c53632_204  | 32.6 | 0.0 | No |
| 7A_1 | 26606348 | Excalibur_c96483_102  | 32.6 | 0.0 | No |
| 7A_1 | 65681395 | Excalibur_c96483_520  | 32.6 | 0.0 | No |
| 7A_1 | 25611435 | GENE-4270_242         | 32.6 | 0.0 | No |
| 7A_1 | 14787339 | GENE-4981_53          | 32.6 | 0.0 | No |
| 7A_1 | 73725379 | IAAV3025              | 32.6 | 0.0 | No |
| 7A_1 | 49633401 | IAAV3027              | 32.6 | 0.0 | No |
| 7A_1 | 55653427 | IAAV3305              | 32.6 | 0.0 | No |
| 7A_1 | 42610408 | IAAV491               | 32.6 | 0.0 | No |
| 7A_1 | 37800425 | IAAV6180              | 32.6 | 0.0 | No |
| 7A_1 | 39776508 | IAAV6597              | 32.6 | 0.0 | No |
| 7A_1 | 16730501 | IACX2907              | 32.6 | 0.0 | No |
| 7A_1 | 48722390 | Jagger_c8331_69       | 32.6 | 0.0 | No |
| 7A_1 | 38708356 | Ku_c29856_132         | 32.6 | 0.0 | No |
| 7A_1 | 73688454 | Ku_c5901_1487         | 32.6 | 0.0 | No |
| 7A_1 | 64649477 | Kukri_c16922_106      | 32.6 | 0.0 | No |
| 7A_1 | 67749392 | Kukri_c47141_54       | 32.6 | 0.0 | No |
| 7A_1 | 47778312 | Kukri_c47141_79       | 32.6 | 0.0 | No |
| 7A_1 | 10603482 | Kukri_c58950_69       | 32.6 | 0.0 | No |
| 7A_1 | 41700442 | Kukri_c6676_172       | 32.6 | 0.0 | No |
| 7A_1 | 71625306 | Kukri_c84323_432      | 32.6 | 0.0 | No |
| 7A_1 | 47608430 | Kukri_rep_c101625_94  | 32.6 | 0.0 | No |
| 7A_1 | 12795333 | Kukri_rep_c105999_572 | 32.6 | 0.0 | No |
| 7A_1 | 15604369 | Ra_c104959_422        | 32.6 | 0.0 | No |
| 7A_1 | 28671465 | Ra_c4601_2417         | 32.6 | 0.0 | No |
| 7A_1 | 46732365 | Ra_c72413_1987        | 32.6 | 0.0 | No |
| 7A_1 | 57704330 | RAC875_c1227_1098     | 32.6 | 0.0 | No |
| 7A_1 | 19720392 | RAC875_c1227_1471     | 32.6 | 0.0 | No |
| 7A_1 | 29722339 | RAC875_c16287_699     | 32.6 | 0.0 | No |
| 7A_1 | 20636491 | RAC875_c16287_726     | 32.6 | 0.0 | No |

|      |          |                             |      |     |    |
|------|----------|-----------------------------|------|-----|----|
| 7A_1 | 37735355 | RAC875_rep_c104959_434      | 32.6 | 0.0 | No |
| 7A_1 | 62702424 | RAC875_rep_c105182_460      | 32.6 | 0.0 | No |
| 7A_1 | 31740461 | RFL_Contig1433_929          | 32.6 | 0.0 | No |
| 7A_1 | 71612422 | TA005578-0927               | 32.6 | 0.0 | No |
| 7A_1 | 49803369 | TA016532-0794               | 32.6 | 0.0 | No |
| 7A_1 | 22771317 | Tdurum_contig12326_232      | 32.6 | 0.0 | No |
| 7A_1 | 29733365 | Tdurum_contig22364_380      | 32.6 | 0.0 | No |
| 7A_1 | 38794315 | Tdurum_contig22364_523      | 32.6 | 0.0 | No |
| 7A_1 | 61712372 | Tdurum_contig22364_580      | 32.6 | 0.0 | No |
| 7A_1 | 57726445 | Tdurum_contig45680_434      | 32.6 | 0.0 | No |
| 7A_1 | 12681302 | Tdurum_contig46611_1061     | 32.6 | 0.0 | No |
| 7A_1 | 53656372 | Tdurum_contig46611_263      | 32.6 | 0.0 | No |
| 7A_1 | 66798469 | Tdurum_contig56144_277      | 32.6 | 0.0 | No |
| 7A_1 | 56662461 | Tdurum_contig56144_369      | 32.6 | 0.0 | No |
| 7A_1 | 61699353 | Tdurum_contig58312_119      | 32.6 | 0.0 | No |
| 7A_1 | 64678346 | Tdurum_contig62357_527      | 32.6 | 0.0 | No |
| 7A_1 | 54635350 | wsnp_CAP11_c1761_958064     | 32.6 | 0.0 | No |
| 7A_1 | 17710454 | wsnp_CAP11_c78_114341       | 32.6 | 0.0 | No |
| 7A_1 | 53707323 | wsnp_CAP11_c827_513472      | 32.6 | 0.0 | No |
| 7A_1 | 42695384 | wsnp_CAP12_c1461_744121     | 32.6 | 0.0 | No |
| 7A_1 | 72712390 | wsnp_CAP7_c949_486485       | 32.6 | 0.0 | No |
| 7A_1 | 62767504 | wsnp_Ex_c1146_2200823       | 32.6 | 0.0 | No |
| 7A_1 | 35798454 | wsnp_Ex_c1146_2201722       | 32.6 | 0.0 | No |
| 7A_1 | 21784398 | wsnp_Ex_c1482_2834254       | 32.6 | 0.0 | No |
| 7A_1 | 52746345 | wsnp_Ex_c15734_24087394     | 32.6 | 0.0 | No |
| 7A_1 | 23728422 | wsnp_Ex_c19005_27918129     | 32.6 | 0.0 | No |
| 7A_1 | 51718399 | wsnp_Ex_c19214_28132186     | 32.6 | 0.0 | No |
| 7A_1 | 40710498 | wsnp_Ex_c1924_3630249       | 32.6 | 0.0 | No |
| 7A_1 | 44694363 | wsnp_Ex_c1924_3630519       | 32.6 | 0.0 | No |
| 7A_1 | 44670459 | wsnp_Ex_c19582_28564743     | 32.6 | 0.0 | No |
| 7A_1 | 67741472 | wsnp_Ex_c26509_35755018     | 32.6 | 0.0 | No |
| 7A_1 | 39619309 | wsnp_Ex_c38326_45883440     | 32.6 | 0.0 | No |
| 7A_1 | 62763384 | wsnp_Ex_c451_885212         | 32.6 | 0.0 | No |
| 7A_1 | 13631349 | wsnp_Ex_c4883_8705816       | 32.6 | 0.0 | No |
| 7A_1 | 57772414 | wsnp_Ex_c49880_54354165     | 32.6 | 0.0 | No |
| 7A_1 | 13762345 | wsnp_Ex_c6059_10615895      | 32.6 | 0.0 | No |
| 7A_1 | 42605337 | wsnp_Ex_c7397_12674744      | 32.6 | 0.0 | No |
| 7A_1 | 12787450 | wsnp_Ex_c7833_13327323      | 32.6 | 0.0 | No |
| 7A_1 | 71699311 | wsnp_Ex_c8614_14453388      | 32.6 | 0.0 | No |
| 7A_1 | 20689405 | wsnp_Ex_c9982_16429661      | 32.6 | 0.0 | No |
| 7A_1 | 46689505 | wsnp_Ex_rep_c68405_67220227 | 32.6 | 0.0 | No |
| 7A_1 | 24713410 | wsnp_Ex_rep_c68405_67220388 | 32.6 | 0.0 | No |
| 7A_1 | 17625411 | wsnp_Ku_c10202_16937059     | 32.6 | 0.0 | No |
| 7A_1 | 17774356 | wsnp_Ku_c34643_43968242     | 32.6 | 0.0 | No |

|      |          |                              |      |      |     |
|------|----------|------------------------------|------|------|-----|
| 7A_1 | 40601356 | wsnp_Ra_c16287_24904962      | 32.6 | 0.0  | No  |
| 7A_1 | 32770453 | wsnp_Ra_c16287_24905062      | 32.6 | 0.0  | No  |
| 7A_1 | 55659327 | wsnp_Ra_c23285_32795964      | 32.6 | 0.0  | No  |
| 7A_1 | 53718451 | wsnp_Ra_c40910_48252997      | 32.6 | 0.0  | No  |
| 7A_1 | 29672496 | wsnp_Ra_rep_c105182_89171265 | 32.6 | 0.0  | No  |
| 7A_1 | 23725497 | wsnp_Ra_rep_c105182_89171305 | 32.6 | 0.0  | No  |
| 7A_1 | 68614361 | wsnp_RFL_Contig1510_707132   | 32.6 | 1.3  | No  |
| 7A_1 | 15603459 | Tdurum_contig27847_579       | 33.9 | 0.0  | Yes |
| 7A_1 | 33614410 | Tdurum_contig93258_281       | 33.9 | 2.4  | No  |
| 7A_1 | 33627313 | Ku_c29856_174                | 36.2 | 14.1 | Yes |
| 7A_1 | 35763461 | BS00066295_51                | 50.3 | 0.0  | Yes |
| 7A_1 | 47626370 | BS00066296_51                | 50.3 | 0.0  | No  |
| 7A_1 | 43665449 | Tdurum_contig8615_230        | 50.3 | 0.0  | No  |
| 7A_1 | 20796325 | Tdurum_contig8615_370        | 50.3 | 0.0  | No  |
| 7A_1 | 61714363 | Tdurum_contig8615_683        | 50.3 | 0.0  | No  |
| 7A_1 | 69802346 | wsnp_CAP11_c2435_1256981     | 50.3 | 4.0  | No  |
| 7A_1 | 35645352 | BS00071478_51                | 54.3 | 0.5  | Yes |
| 7A_1 | 14737379 | BobWhite_c12302_368          | 54.8 | 0.0  | Yes |
| 7A_1 | 69639443 | BobWhite_c15352_394          | 54.8 | 0.0  | No  |
| 7A_1 | 49633328 | BS00009838_51                | 54.8 | 0.0  | No  |
| 7A_1 | 55636416 | BS00009926_51                | 54.8 | 0.0  | No  |
| 7A_1 | 30715420 | BS00021261_51                | 54.8 | 0.0  | No  |
| 7A_1 | 48689415 | BS00067425_51                | 54.8 | 0.0  | No  |
| 7A_1 | 33647434 | BS00067610_51                | 54.8 | 0.0  | No  |
| 7A_1 | 55645428 | BS00068562_51                | 54.8 | 0.0  | No  |
| 7A_1 | 53792429 | BS00088825_51                | 54.8 | 0.0  | No  |
| 7A_1 | 33798311 | BS00094965_51                | 54.8 | 0.0  | No  |
| 7A_1 | 35614403 | Excalibur_c71066_78          | 54.8 | 0.0  | No  |
| 7A_1 | 16622383 | IACX2471                     | 54.8 | 0.0  | No  |
| 7A_1 | 14778505 | Kukri_c57086_133             | 54.8 | 0.0  | No  |
| 7A_1 | 72788475 | Ra_c14761_1468               | 54.8 | 0.0  | No  |
| 7A_1 | 35662343 | RAC875_c37085_317            | 54.8 | 0.0  | No  |
| 7A_1 | 52672441 | RAC875_c41659_794            | 54.8 | 0.0  | No  |
| 7A_1 | 25772445 | RAC875_c43295_135            | 54.8 | 0.0  | No  |
| 7A_1 | 34754377 | RAC875_c56692_170            | 54.8 | 0.0  | No  |
| 7A_1 | 70732301 | Tdurum_contig41918_666       | 54.8 | 0.0  | No  |
| 7A_1 | 65698391 | Tdurum_contig42954_1081      | 54.8 | 0.0  | No  |
| 7A_1 | 57691399 | Tdurum_contig42954_657       | 54.8 | 0.0  | No  |
| 7A_1 | 22660401 | Tdurum_contig69067_287       | 54.8 | 0.0  | No  |
| 7A_1 | 22696409 | Tdurum_contig69067_405       | 54.8 | 0.0  | No  |
| 7A_1 | 54761481 | wsnp_Ku_c21665_31431143      | 54.8 | 0.0  | No  |
| 7A_1 | 17632507 | wsnp_Ku_c42539_50247597      | 54.8 | 0.0  | No  |
| 7A_1 | 66692413 | wsnp_Ex_c1309_2502521        | 54.8 |      | Yes |
| 7A_2 | 60749472 | Tdurum_contig955_254         | 0.0  | 13.6 | Yes |

|      |          |                              |      |     |     |
|------|----------|------------------------------|------|-----|-----|
| 7A_2 | 13617450 | Kukri_rep_c101374_298        | 13.6 | 0.0 | Yes |
| 7A_2 | 27643398 | Tdurum_contig85217_206       | 13.6 | 0.0 | No  |
| 7A_2 | 22801377 | Tdurum_contig85217_286       | 13.6 | 1.5 | No  |
| 7A_2 | 62751412 | BS00069242_51                | 15.1 | 0.0 | Yes |
| 7A_2 | 46801361 | wsnp_CAP11_rep_c4066_1921894 | 15.1 |     | No  |
| 7A_3 | 48713451 | BS00110256_51                | 0.0  | 0.0 | Yes |
| 7A_3 | 28636390 | BS00002510_51                | 0.0  | 0.0 | Yes |
| 7A_3 | 10720428 | BS00062611_51                | 0.0  | 0.0 | No  |
| 7A_3 | 62771430 | BS00064413_51                | 0.0  | 0.0 | No  |
| 7A_3 | 10723468 | BS00076120_51                | 0.0  | 0.0 | No  |
| 7A_3 | 74635481 | Ex_c23405_470                | 0.0  | 0.0 | No  |
| 7A_3 | 56686307 | Ex_c499_767                  | 0.0  | 0.0 | No  |
| 7A_3 | 10651313 | Excalibur_c34189_122         | 0.0  | 0.0 | No  |
| 7A_3 | 26794374 | Excalibur_c46453_144         | 0.0  | 0.0 | No  |
| 7A_3 | 65724482 | IAAV2968                     | 0.0  | 0.0 | No  |
| 7A_3 | 66804507 | Ku_c10243_855                | 0.0  | 0.0 | No  |
| 7A_3 | 41687337 | Kukri_c17839_484             | 0.0  | 0.0 | No  |
| 7A_3 | 29690496 | Kukri_c33620_129             | 0.0  | 0.0 | No  |
| 7A_3 | 62740447 | Kukri_c9728_1171             | 0.0  | 0.0 | No  |
| 7A_3 | 37725373 | RAC875_c57584_240            | 0.0  | 0.0 | No  |
| 7A_3 | 60626350 | Tdurum_contig12454_585       | 0.0  | 0.0 | No  |
| 7A_3 | 44661448 | Tdurum_contig59633_56        | 0.0  | 0.0 | No  |
| 7A_3 | 27679420 | Tdurum_contig93328_869       | 0.0  | 0.0 | No  |
| 7A_3 | 48783358 | Tdurum_contig97505_172       | 0.0  | 0.0 | No  |
| 7A_3 | 45667376 | wsnp_Ex_c53387_56639949      | 0.0  | 0.0 | No  |
| 7A_3 | 54755386 | wsnp_Ex_c53387_56641291      | 0.0  | 1.5 | No  |
| 7A_3 | 70786301 | BS00065453_51                | 1.5  | 0.0 | Yes |
| 7A_3 | 22633491 | BS00065454_51                | 1.5  | 0.0 | No  |
| 7A_3 | 63737367 | CAP8_c8600_130               | 1.5  | 0.0 | No  |
| 7A_3 | 67702320 | CAP8_c8600_222               | 1.5  | 0.0 | No  |
| 7A_3 | 64724489 | Excalibur_c3286_103          | 1.5  | 0.0 | No  |
| 7A_3 | 53753429 | GENE-1996_277                | 1.5  | 0.0 | No  |
| 7A_3 | 48807457 | IAAV14                       | 1.5  | 0.0 | No  |
| 7A_3 | 66637436 | Kukri_c12384_430             | 1.5  | 0.0 | No  |
| 7A_3 | 38725372 | Kukri_c28077_282             | 1.5  | 0.0 | No  |
| 7A_3 | 49651304 | Kukri_c28968_130             | 1.5  | 0.0 | No  |
| 7A_3 | 69710398 | Kukri_c54653_270             | 1.5  | 0.0 | No  |
| 7A_3 | 22672366 | Kukri_c54653_295             | 1.5  | 0.0 | No  |
| 7A_3 | 16603424 | RAC875_c11283_379            | 1.5  | 0.0 | No  |
| 7A_3 | 60787443 | RAC875_c2532_64              | 1.5  | 0.0 | No  |
| 7A_3 | 55622432 | Tdurum_contig59467_433       | 1.5  | 0.0 | No  |
| 7A_3 | 41602427 | Tdurum_contig59467_534       | 1.5  | 0.0 | No  |
| 7A_3 | 67758453 | wsnp_Ex_c1159_2224684        | 1.5  | 0.0 | No  |
| 7A_3 | 30772403 | wsnp_Ex_c1159_2225557        | 1.5  | 0.0 | No  |

|      |          |                            |      |     |     |
|------|----------|----------------------------|------|-----|-----|
| 7A_3 | 37702356 | Ex_c1159_616               | 1.6  |     | Yes |
| 7B_1 | 35721458 | BS00067942_51              | 0.0  | 7.7 | Yes |
| 7B_1 | 22719392 | Tdurum_contig51087_573     | 7.7  | 0.0 | Yes |
| 7B_1 | 32728355 | BobWhite_c10017_644        | 7.8  | 0.0 | Yes |
| 7B_1 | 59781423 | BobWhite_c20290_226        | 7.8  | 0.0 | No  |
| 7B_1 | 40752507 | BobWhite_c20571_102        | 7.8  | 0.0 | No  |
| 7B_1 | 45677388 | BobWhite_c21181_787        | 7.8  | 0.0 | No  |
| 7B_1 | 23767477 | BS00062967_51              | 7.8  | 0.0 | No  |
| 7B_1 | 66632397 | CAP7_c122_102              | 7.8  | 0.0 | No  |
| 7B_1 | 68698337 | Ex_c68356_765              | 7.8  | 0.0 | No  |
| 7B_1 | 48629320 | Excalibur_rep_c102182_311  | 7.8  | 0.0 | No  |
| 7B_1 | 66628490 | Excalibur_rep_c71057_1199  | 7.8  | 0.0 | No  |
| 7B_1 | 12605377 | JD_c11426_334              | 7.8  | 0.0 | No  |
| 7B_1 | 70635406 | Ku_c1839_202               | 7.8  | 0.0 | No  |
| 7B_1 | 33629390 | Kukri_c1576_1469           | 7.8  | 0.0 | No  |
| 7B_1 | 11652505 | Kukri_c21302_194           | 7.8  | 0.0 | No  |
| 7B_1 | 21774400 | Kukri_c21336_512           | 7.8  | 0.0 | No  |
| 7B_1 | 22796449 | Kukri_rep_c102204_68       | 7.8  | 0.0 | No  |
| 7B_1 | 28617303 | Kukri_rep_c103332_710      | 7.8  | 0.0 | No  |
| 7B_1 | 59689333 | Ra_c11468_305              | 7.8  | 0.0 | No  |
| 7B_1 | 48646442 | Ra_c38371_1171             | 7.8  | 0.0 | No  |
| 7B_1 | 58794487 | RAC875_c1638_165           | 7.8  | 0.0 | No  |
| 7B_1 | 23763394 | RAC875_c3876_1123          | 7.8  | 0.0 | No  |
| 7B_1 | 31632483 | RAC875_c6303_529           | 7.8  | 0.0 | No  |
| 7B_1 | 49768307 | Tdurum_contig28644_281     | 7.8  | 0.0 | No  |
| 7B_1 | 69632376 | Tdurum_contig28644_90      | 7.8  | 0.0 | No  |
| 7B_1 | 12664425 | Tdurum_contig31496_79      | 7.8  | 0.0 | No  |
| 7B_1 | 27606399 | wsnp_CAP11_c32_70127       | 7.8  | 0.0 | No  |
| 7B_1 | 19653365 | wsnp_Ex_c27914_37074773    | 7.8  | 0.0 | No  |
| 7B_1 | 71670359 | wsnp_Ex_c27914_37075168    | 7.8  | 0.0 | No  |
| 7B_1 | 66782450 | wsnp_RFL_Contig1210_295012 | 7.8  | 5.5 | No  |
| 7B_1 | 24624475 | BobWhite_rep_c64768_264    | 13.3 | 0.0 | Yes |
| 7B_1 | 66771372 | BS00022841_51              | 13.3 | 0.0 | No  |
| 7B_1 | 58780454 | BS00079017_51              | 13.3 | 0.0 | No  |
| 7B_1 | 60646423 | BS00079019_51              | 13.3 | 0.0 | No  |
| 7B_1 | 24786348 | CAP7_c10566_170            | 13.3 | 0.0 | No  |
| 7B_1 | 63801383 | IAAV3391                   | 13.3 | 0.0 | No  |
| 7B_1 | 15753403 | IAAV7544                   | 13.3 | 0.0 | No  |
| 7B_1 | 53731445 | Tdurum_contig84962_256     | 13.3 | 0.0 | No  |
| 7B_1 | 53737362 | Tdurum_contig84962_266     | 13.3 | 1.4 | No  |
| 7B_1 | 64672434 | GENE-4750_46               | 14.7 | 0.0 | Yes |
| 7B_1 | 18679496 | TA001320-0384              | 14.7 | 5.6 | No  |
| 7B_1 | 27793473 | IAAV7520                   | 20.3 | 0.0 | Yes |
| 7B_1 | 52725344 | Tdurum_contig12084_1122    | 20.3 | 0.0 | No  |

|      |          |                             |      |     |     |
|------|----------|-----------------------------|------|-----|-----|
| 7B_1 | 22618374 | Tdurum_contig20094_458      | 20.3 | 0.0 | No  |
| 7B_1 | 25738509 | Tdurum_contig32954_195      | 20.3 | 0.0 | No  |
| 7B_1 | 42667467 | Tdurum_contig44261_127      | 20.3 | 0.0 | No  |
| 7B_1 | 62669310 | Tdurum_contig44261_795      | 20.3 | 0.0 | No  |
| 7B_1 | 44612434 | Tdurum_contig75644_138      | 20.3 | 0.0 | No  |
| 7B_1 | 51712302 | Tdurum_contig75644_871      | 20.3 | 8.5 | No  |
| 7B_1 | 57632410 | IACX6036                    | 28.8 | 0.0 | Yes |
| 7B_1 | 72792426 | Jagger_c9314_100            | 28.8 | 0.0 | No  |
| 7B_1 | 74725439 | Ku_c46689_1653              | 28.8 | 0.0 | No  |
| 7B_1 | 43767454 | Kukri_c15310_755            | 28.8 | 0.0 | No  |
| 7B_1 | 13651445 | Kukri_c36225_133            | 28.8 | 0.0 | No  |
| 7B_1 | 72772452 | Kukri_rep_c69164_94         | 28.8 | 0.0 | No  |
| 7B_1 | 15748471 | RAC875_c16839_188           | 28.8 | 0.0 | No  |
| 7B_1 | 72759491 | RFL_Contig492_751           | 28.8 | 0.0 | No  |
| 7B_1 | 24643306 | Tdurum_contig11028_398      | 28.8 | 0.0 | No  |
| 7B_1 | 57771371 | Tdurum_contig11028_533      | 28.8 | 0.0 | No  |
| 7B_1 | 46701469 | Tdurum_contig11557_86       | 28.8 | 0.0 | No  |
| 7B_1 | 26626333 | Tdurum_contig1969_254       | 28.8 | 0.0 | No  |
| 7B_1 | 42661433 | Tdurum_contig35652_348      | 28.8 | 0.0 | No  |
| 7B_1 | 29802360 | Tdurum_contig43523_1458     | 28.8 | 0.0 | No  |
| 7B_1 | 49633404 | Tdurum_contig43523_359      | 28.8 | 0.0 | No  |
| 7B_1 | 68686485 | Tdurum_contig46877_173      | 28.8 | 0.0 | No  |
| 7B_1 | 58647353 | Tdurum_contig46877_262      | 28.8 | 0.0 | No  |
| 7B_1 | 14668370 | Tdurum_contig46877_488      | 28.8 | 0.0 | No  |
| 7B_1 | 44687469 | Tdurum_contig46877_84       | 28.8 | 0.0 | No  |
| 7B_1 | 51700342 | Tdurum_contig48824_476      | 28.8 | 0.0 | No  |
| 7B_1 | 66663396 | Tdurum_contig49572_643      | 28.8 | 0.0 | No  |
| 7B_1 | 20617508 | Tdurum_contig51024_1234     | 28.8 | 0.0 | No  |
| 7B_1 | 28661352 | Tdurum_contig66810_100      | 28.8 | 0.0 | No  |
| 7B_1 | 34768350 | Tdurum_contig66810_334      | 28.8 | 0.0 | No  |
| 7B_1 | 61767337 | Tdurum_contig81683_217      | 28.8 | 0.0 | No  |
| 7B_1 | 26761454 | wsnp_Ex_c35742_43830556     | 28.8 | 0.0 | No  |
| 7B_1 | 38778317 | wsnp_Ex_c36325_44308589     | 28.8 | 0.0 | No  |
| 7B_1 | 21640356 | wsnp_Ex_c6590_11419735      | 28.8 | 0.0 | No  |
| 7B_1 | 19679312 | wsnp_Ex_rep_c67369_65940601 | 28.8 | 2.8 | No  |
| 7B_1 | 18682384 | Excalibur_c2389_361         | 31.6 | 0.0 | Yes |
| 7B_1 | 53630448 | RAC875_c19943_2198          | 31.6 | 0.0 | No  |
| 7B_1 | 55632354 | wsnp_CAP8_rep_c3687_1819173 | 31.6 | 0.0 | No  |
| 7B_1 | 71795373 | wsnp_Ex_c24376_33618864     | 31.6 | 0.0 | No  |
| 7B_1 | 29630411 | wsnp_Ex_c24376_33619527     | 31.6 | 2.9 | No  |
| 7B_1 | 19691476 | Excalibur_c108159_334       | 34.5 | 0.0 | Yes |
| 7B_1 | 27691304 | Excalibur_c97905_134        | 34.5 | 0.0 | No  |
| 7B_1 | 21716484 | Tdurum_contig66398_976      | 34.5 | 0.0 | No  |
| 7B_1 | 33721337 | wsnp_Ex_c2103_3947695       | 34.5 | 1.2 | No  |



|      |          |                           |      |      |     |
|------|----------|---------------------------|------|------|-----|
| 7B_1 | 43630403 | BobWhite_c44404_312       | 35.7 | 0.0  | Yes |
| 7B_1 | 21733363 | GENE-4833_102             | 35.7 | 0.0  | No  |
| 7B_1 | 25809376 | Kukri_c67849_109          | 35.7 | 0.0  | No  |
| 7B_1 | 28790343 | Ra_c39042_935             | 35.7 | 0.0  | No  |
| 7B_1 | 60662304 | Tdurum_contig46398_534    | 35.7 | 0.0  | No  |
| 7B_1 | 27744314 | Tdurum_contig99020_139    | 35.7 | 3.0  | No  |
| 7B_1 | wPt-2883 | wPt-2883                  | 38.7 | 10.8 | Yes |
| 7B_1 | 47748478 | Excalibur_c3423_1170      | 49.5 | 0.0  | Yes |
| 7B_1 | 58705312 | Tdurum_contig30677_66     | 49.5 |      | No  |
| 7B_2 | wPt-4025 | wPt-4025                  | 0.0  | 1.4  | Yes |
| 7B_2 | 39676487 | tplb0055p22_1895          | 1.4  | 0.1  | Yes |
| 7B_2 | 53720390 | BobWhite_c5961_849        | 1.5  | 0.0  | Yes |
| 7B_2 | 25600403 | BobWhite_rep_c64772_309   | 1.5  | 0.0  | No  |
| 7B_2 | 58715333 | Excalibur_c2217_68        | 1.5  | 0.0  | No  |
| 7B_2 | 65778349 | IACX1805                  | 1.5  | 0.0  | No  |
| 7B_2 | 46797467 | Ku_c6047_1228             | 1.5  | 0.0  | No  |
| 7B_2 | 21807333 | Kukri_c38676_251          | 1.5  | 0.0  | No  |
| 7B_2 | 35810382 | Kukri_c8718_193           | 1.5  | 0.0  | No  |
| 7B_2 | 44791428 | RAC875_c37751_215         | 1.5  | 0.0  | No  |
| 7B_2 | 60800370 | RAC875_c5646_969          | 1.5  | 0.0  | No  |
| 7B_2 | 62697475 | RAC875_c570_302           | 1.5  | 0.0  | No  |
| 7B_2 | 39658309 | RAC875_rep_c73821_223     | 1.5  | 0.0  | No  |
| 7B_2 | 73793401 | Tdurum_contig16482_124    | 1.5  | 0.0  | No  |
| 7B_2 | 35669424 | Tdurum_contig28174_132    | 1.5  | 0.0  | No  |
| 7B_2 | 70673320 | Tdurum_contig28174_476    | 1.5  | 0.0  | No  |
| 7B_2 | 45681454 | Tdurum_contig28174_76     | 1.5  | 0.0  | No  |
| 7B_2 | 55765462 | Tdurum_contig29317_467    | 1.5  | 0.0  | No  |
| 7B_2 | 36807361 | Tdurum_contig34357_160    | 1.5  | 0.0  | No  |
| 7B_2 | 45695495 | Tdurum_contig43966_1107   | 1.5  | 0.0  | No  |
| 7B_2 | 43657502 | wsnp_BF482403B_Ta_1_1     | 1.5  | 0.0  | No  |
| 7B_2 | 48734390 | wsnp_CAP11_c103_134545    | 1.5  | 3.2  | No  |
| 7B_2 | 52631386 | CAP7_c9776_62             | 4.6  | 0.0  | Yes |
| 7B_2 | 21713430 | Excalibur_c6738_2072      | 4.6  | 0.0  | No  |
| 7B_2 | 48637330 | Excalibur_rep_c108075_472 | 4.6  | 0.0  | No  |
| 7B_2 | 31688363 | RAC875_c1742_2710         | 4.6  | 0.0  | No  |
| 7B_2 | 27652461 | RAC875_c6020_496          | 4.6  | 0.0  | No  |
| 7B_2 | 53768466 | Tdurum_contig3914_153     | 4.6  | 0.0  | No  |
| 7B_2 | 22771389 | Tdurum_contig50574_304    | 4.6  | 0.0  | No  |
| 7B_2 | 70717323 | Tdurum_contig74753_946    | 4.6  | 0.0  | No  |
| 7B_2 | 72627443 | Tdurum_contig98926_227    | 4.6  | 0.7  | No  |
| 7B_2 | 70777505 | BS00075332_51             | 5.3  | 0.0  | Yes |
| 7B_2 | 13666384 | CAP7_c3661_99             | 5.3  | 0.0  | No  |
| 7B_2 | 26805419 | Ra_c11303_583             | 5.3  | 1.4  | No  |
| 7B_2 | 48708393 | Excalibur_c29455_428      | 6.7  | 0.1  | Yes |

|      |          |                             |      |     |     |
|------|----------|-----------------------------|------|-----|-----|
| 7B_2 | 21679482 | BobWhite_rep_c52876_72      | 6.8  | 0.0 | Yes |
| 7B_2 | 22622379 | Excalibur_c13444_235        | 6.8  | 0.0 | No  |
| 7B_2 | 67779490 | RAC875_c4834_694            | 6.8  | 0.0 | No  |
| 7B_2 | 36809318 | wsnp_BF291608B_Ta_2_1       | 6.8  | 0.0 | No  |
| 7B_2 | 30628330 | wsnp_BF291608B_Ta_2_2       | 6.8  | 2.4 | No  |
| 7B_2 | 73605324 | Kukri_rep_c70697_875        | 9.2  | 2.9 | Yes |
| 7B_2 | 36714410 | BobWhite_c12256_96          | 12.1 | 0.0 | Yes |
| 7B_2 | 74719351 | BobWhite_c34689_116         | 12.1 | 0.0 | No  |
| 7B_2 | 14617381 | BS00003350_51               | 12.1 | 0.0 | No  |
| 7B_2 | 30632447 | BS00089938_51               | 12.1 | 0.0 | No  |
| 7B_2 | 26657325 | BS00089942_51               | 12.1 | 0.0 | No  |
| 7B_2 | 16655330 | CAP7_rep_c5216_143          | 12.1 | 0.0 | No  |
| 7B_2 | 68771482 | D_contig00840_473           | 12.1 | 0.0 | No  |
| 7B_2 | 26805408 | Excalibur_c11857_1196       | 12.1 | 0.0 | No  |
| 7B_2 | 67718342 | Excalibur_c21739_688        | 12.1 | 0.0 | No  |
| 7B_2 | 65773468 | Excalibur_c32038_566        | 12.1 | 0.0 | No  |
| 7B_2 | 42657509 | GENE-4608_280               | 12.1 | 0.0 | No  |
| 7B_2 | 40630393 | GENE-4624_79                | 12.1 | 0.0 | No  |
| 7B_2 | 67652348 | IACX486                     | 12.1 | 0.0 | No  |
| 7B_2 | 40712329 | Ku_c10179_1837              | 12.1 | 0.0 | No  |
| 7B_2 | 66735315 | Kukri_c14766_484            | 12.1 | 0.0 | No  |
| 7B_2 | 69746482 | Kukri_c50071_1084           | 12.1 | 0.0 | No  |
| 7B_2 | 53611363 | Kukri_c51101_351            | 12.1 | 0.0 | No  |
| 7B_2 | 73693338 | Ra_c10804_1595              | 12.1 | 0.0 | No  |
| 7B_2 | 11735436 | RAC875_c21489_908           | 12.1 | 0.0 | No  |
| 7B_2 | 18628474 | RAC875_c27548_234           | 12.1 | 0.0 | No  |
| 7B_2 | 33681423 | RAC875_c27548_417           | 12.1 | 0.0 | No  |
| 7B_2 | 34733359 | RAC875_c4128_926            | 12.1 | 0.0 | No  |
| 7B_2 | 35624409 | RAC875_c54615_58            | 12.1 | 0.0 | No  |
| 7B_2 | 21651493 | RAC875_c9494_651            | 12.1 | 0.0 | No  |
| 7B_2 | 52722334 | Tdurum_contig41998_1213     | 12.1 | 0.0 | No  |
| 7B_2 | 20670414 | wsnp_Ex_c10550_17231294     | 12.1 | 0.0 | No  |
| 7B_2 | 50632495 | wsnp_Ex_c10550_17231658     | 12.1 | 0.0 | No  |
| 7B_2 | 71707494 | wsnp_Ex_c53019_56399917     | 12.1 | 0.0 | No  |
| 7B_2 | 23734497 | wsnp_Ex_rep_c70700_69597262 | 12.1 | 0.0 | No  |
| 7B_2 | 42714316 | wsnp_Ku_c17161_26193672     | 12.1 | 0.0 | No  |
| 7B_2 | 47623406 | wsnp_Ku_c17161_26193994     | 12.1 | 0.9 | No  |
| 7B_2 | wPt-8312 | wPt-8312                    | 13.0 | 0.0 | Yes |
| 7B_2 | wPt-9133 | wPt-9133                    | 13.0 | 3.6 | Yes |
| 7B_2 | 47791339 | Tdurum_contig97814_355      | 16.6 | 0.0 | Yes |
| 7B_2 | 62727322 | tplb0033d17_389             | 16.6 | 0.1 | No  |
| 7B_2 | wPt-3723 | wPt-3723                    | 16.7 | 1.0 | Yes |
| 7B_2 | 21635381 | BobWhite_c292_385           | 17.7 | 0.0 | Yes |
| 7B_2 | 49699505 | BS00070791_51               | 17.7 | 0.0 | No  |

|      |                          |                          |      |     |     |
|------|--------------------------|--------------------------|------|-----|-----|
| 7B_2 | 20733378                 | BS00076675_51            | 17.7 | 0.0 | No  |
| 7B_2 | 50725360                 | Excalibur_c48976_396     | 17.7 | 0.0 | No  |
| 7B_2 | 40748320                 | Kukri_c25451_119         | 17.7 | 0.0 | No  |
| 7B_2 | 20763448                 | Kukri_c29415_392         | 17.7 | 0.0 | No  |
| 7B_2 | 28725491                 | RAC875_c3361_180         | 17.7 | 0.0 | No  |
| 7B_2 | 69763476                 | RAC875_c45062_305        | 17.7 | 0.0 | No  |
| 7B_2 | 18650392                 | RFL_Contig1874_216       | 17.7 | 0.0 | No  |
| 7B_2 | 60737311                 | Tdurum_contig13930_254   | 17.7 | 0.0 | No  |
| 7B_2 | 55638485                 | Tdurum_contig5083_1164   | 17.7 | 0.0 | No  |
| 7B_2 | 47664306                 | wsnp_Ex_c10500_17163855  | 17.7 | 0.0 | No  |
| 7B_2 | 35803481                 | wsnp_Ex_c10571_17258682  | 17.7 | 0.0 | No  |
| 7B_2 | 49692305                 | wsnp_Ex_c3309_6096114    | 17.7 | 0.0 | No  |
| 7B_2 | 42805505                 | wsnp_Ku_c16295_25149034  | 17.7 | 1.5 | No  |
| 7B_2 | 22764496                 | BS00039118_51            | 19.2 | 0.0 | Yes |
| 7B_2 | 60682366                 | BS00101408_51            | 19.2 | 0.0 | No  |
| 7B_2 | 31600479                 | Excalibur_c74925_338     | 19.2 | 0.0 | No  |
| 7B_2 | 25669323                 | GENE-4996_592            | 19.2 | 0.0 | No  |
| 7B_2 | 74749308                 | Kukri_c31628_571         | 19.2 | 0.0 | No  |
| 7B_2 | 20638382                 | Tdurum_contig10677_529   | 19.2 | 0.0 | No  |
| 7B_2 | 66688474                 | Tdurum_contig14821_751   | 19.2 | 0.0 | No  |
| 7B_2 | 36667398                 | Tdurum_contig43995_370   | 19.2 | 0.0 | No  |
| 7B_2 | 37602467                 | Tdurum_contig43995_611   | 19.2 | 0.0 | No  |
| 7B_2 | 57663499                 | wsnp_BE498985A_Ta_2_1    | 19.2 | 0.0 | No  |
| 7B_2 | 72656358                 | wsnp_BE605194B_Ta_2_1    | 19.2 | 0.0 | No  |
| 7B_2 | 52803426                 | wsnp_BE605194B_Ta_2_7    | 19.2 | 5.3 | No  |
| 7B_2 | 58786403                 | BS00064871_51            | 24.4 | 0.0 | Yes |
| 7B_2 | 35754432                 | Tdurum_contig63311_285   | 24.4 | 1.1 | No  |
| 7B_2 | <a href="#">wPt-8615</a> | <a href="#">wPt-8615</a> | 25.6 | 0.8 | Yes |
| 7B_2 | 57718474                 | BobWhite_c21838_152      | 26.4 | 0.0 | Yes |
| 7B_2 | 25600474                 | BS00047083_51            | 26.4 | 0.0 | No  |
| 7B_2 | 74798311                 | BS00090785_51            | 26.4 | 0.0 | No  |
| 7B_2 | 23742370                 | BS00101087_51            | 26.4 | 0.0 | No  |
| 7B_2 | 52675418                 | Excalibur_c16856_432     | 26.4 | 0.0 | No  |
| 7B_2 | 35636419                 | IAAV6659                 | 26.4 | 0.0 | No  |
| 7B_2 | 59601354                 | IACX8294                 | 26.4 | 0.0 | No  |
| 7B_2 | 48640421                 | Kukri_c11141_203         | 26.4 | 0.0 | No  |
| 7B_2 | 18742406                 | Kukri_c292_2231          | 26.4 | 0.0 | No  |
| 7B_2 | 30635376                 | Kukri_c345_644           | 26.4 | 0.0 | No  |
| 7B_2 | 35774391                 | RAC875_c22172_454        | 26.4 | 0.0 | No  |
| 7B_2 | 38722344                 | RAC875_c37638_233        | 26.4 | 0.0 | No  |
| 7B_2 | 35717459                 | RAC875_c89312_61         | 26.4 | 0.0 | No  |
| 7B_2 | 39695387                 | RFL_Contig4842_579       | 26.4 | 0.0 | No  |
| 7B_2 | 20792420                 | RFL_Contig5701_783       | 26.4 | 0.0 | No  |
| 7B_2 | 56804441                 | Tdurum_contig4658_106    | 26.4 | 0.0 | No  |

|      |          |                       |      |     |     |
|------|----------|-----------------------|------|-----|-----|
| 7B_2 | 55804337 | Tdurum_contig5360_182 | 26.4 | 0.0 | No  |
| 7B_2 | 61717319 | Tdurum_contig5360_329 | 26.4 | 0.0 | No  |
| 7B_2 | 43606499 | Tdurum_contig5360_379 | 26.4 | 0.0 | No  |
| 7B_2 | 21705415 | Tdurum_contig5360_95  | 26.4 | 0.0 | No  |
| 7B_2 | 41767403 | TA006300-0258         | 26.5 | 0.0 | Yes |
| 7B_2 | 25669458 | D_F5XZDLF01DRADL_134  | 26.5 | 0.9 | Yes |
| 7B_2 | 53749327 | RAC875_c37638_174     | 27.4 | 1.2 | Yes |
| 7B_2 | wPt-5343 | wPt-5343              | 28.6 | 1.9 | Yes |
| 7B_2 | 52724354 | BS00068305_51         | 30.5 | 0.0 | Yes |
| 7B_2 | 18641394 | BS00068309_51         | 30.5 | 0.0 | No  |
| 7B_2 | 44764324 | Excalibur_c41736_124  | 30.5 | 0.0 | No  |
| 7B_2 | 24625311 | RAC875_c41903_122     | 30.5 | 0.0 | No  |
| 7B_2 | 46755300 | TA002394-1002         | 30.5 | 1.6 | No  |
| 7B_2 | 63671448 | BS00067433_51         | 32.1 | 0.0 | Yes |
| 7B_2 | 50807352 | D_contig05029_98      | 32.1 | 0.0 | No  |
| 7B_2 | 48658323 | Excalibur_c2062_383   | 32.1 | 0.0 | No  |
| 7B_2 | 27720504 | Kukri_c28239_224      | 32.1 | 0.0 | No  |
| 7B_2 | 73716402 | RAC875_c15057_1050    | 32.1 | 0.0 | No  |
| 7B_2 | 41703336 | Tdurum_contig49613_61 | 32.1 |     | No  |

---

SNP: single nucleotide polymorphism; DArT: diversity array technology; QTL: quantitative trait loci; cM: centi Morgan; DArT markers are shown in blue colour
